# Supplementary material for: An approach for the systematic profiling of drug-induced remodeling of RNA–RBP (RNA-binding protein) interactions
Source: Royal Society of Chemistry journal article supplement (doi:10.1039/d6ra00871b), 2026-05-19
Supplement: d6ra00871b1.pdf [file d6ra00871b1.pdf]

## Supplementary Information

### **An approach for systematic profiling of drug-induced remodeling of RNA-RBP (RNA-binding protein) interactions**

**Yajie Jiao,<sup>a</sup> Jinguo Zhao,<sup>a</sup> Bin Fu,<sup>a</sup> Peiyong Dong,<sup>a</sup> Xiaohong Qian,<sup>a</sup>  
Tong Liu<sup>\*ab</sup> and Weijie Qin<sup>\*ac</sup>**

<sup>a</sup>State Key Laboratory of Medical Proteomics, National Center for Protein Sciences Beijing, Academy of Military Medical Sciences, Beijing 102206, China.

<sup>b</sup>Key Laboratory of Engineering Biology for Low-Carbon Manufacturing, Systems Biology Centre, Technical Support Core Facilities, Tianjin Institute of Industrial Biotechnology, Chinese Academy of Sciences, Tianjin 300308, China.

<sup>c</sup>Beijing Proteome Research Center, Beijing 102206, China.

\*Correspondence: liutong19920918@163.com (Tong Liu), aunp\_dna@126.com (Weijie Qin)

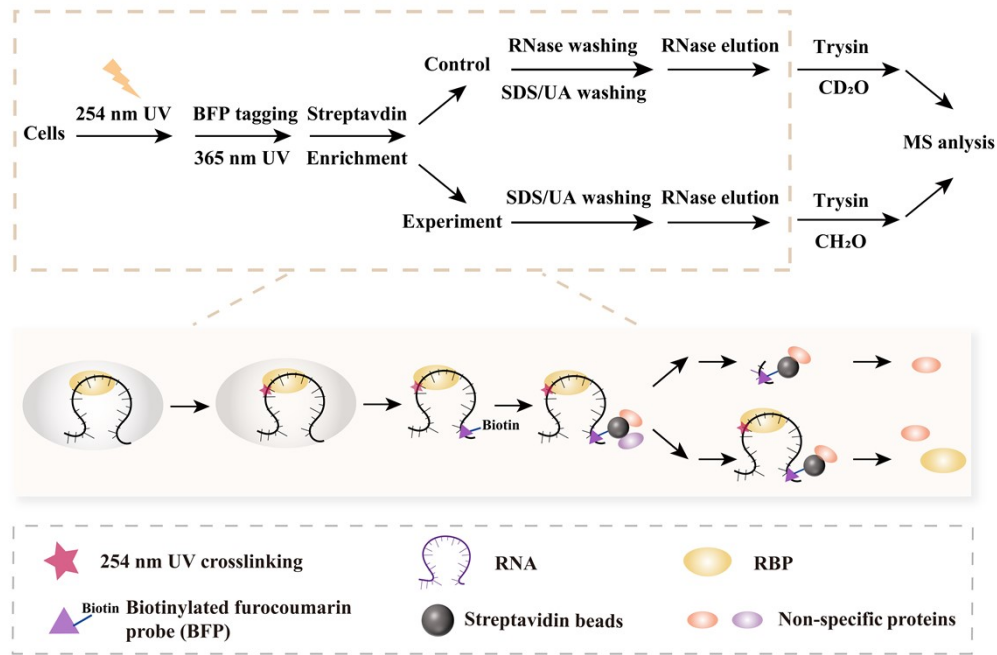

**Figure S1.** Schematic diagram of the experimental design for quantitative differential proteomic comparison between the experimental group and the control group (RNase washing).

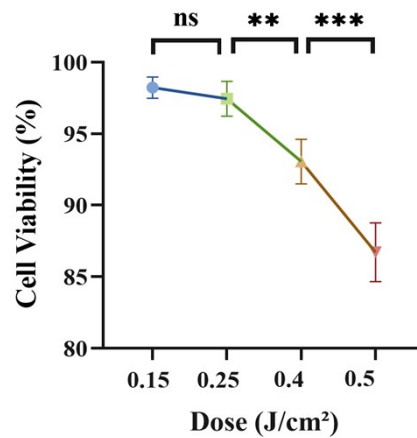

**Figure S2.** UV dose-response analysis of cell viability. Data are presented as mean  $\pm$  SD (n = 4). ns, not significant; \*\*P < 0.01; \*\*\*P < 0.001.

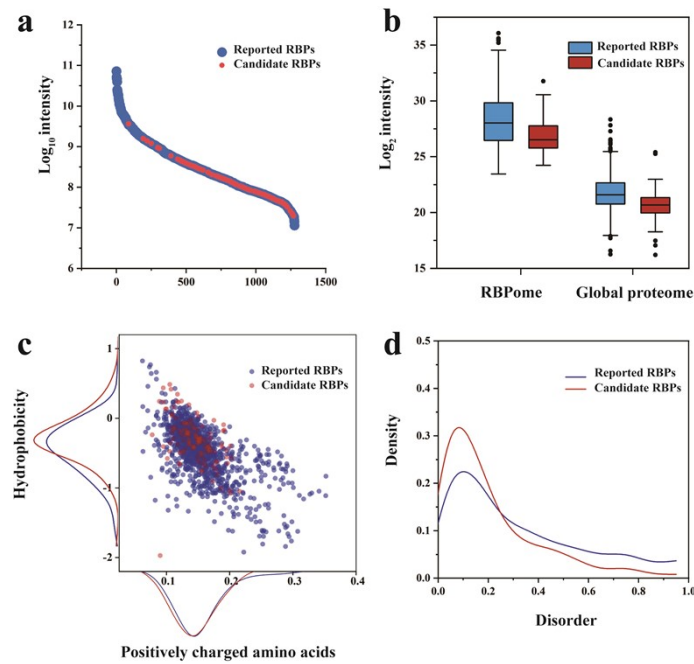

**Figure S3.** Comparison of the candidate RBPs with the overlapping RBPs identified in previously reported human RBPome datasets. (a) Scatter plot of abundance ranking of the overlapping RBPs and candidate RBPs. (b) Box plot of abundance of the overlapping RBPs and candidate RBPs in the RBPome and global proteome. (c) Scatter plot showing hydrophobicity and percentage of positively charged amino acids of the overlapping RBPs and candidate RBPs, with density distribution of each feature outside the coordinate axis. (d) Density distribution pattern of disorder for the overlapping RBPs and candidate RBPs.

**Table S3** Technical comparison of BFP-based method with established RBP enrichment methods

| Method   | Cellular perturbation | Specificity | Identified RBPs | Time of enrichment procedure | Throughput | Reference |
|----------|-----------------------|-------------|-----------------|------------------------------|------------|-----------|
| ChIRP-MS | Without               | Low         | 81              | 27-28 h                      | Low        | [53]      |
| RAP-MS   | Without               | High        | 10              | 18-19 h                      | Low        | [54]      |
| CARIC    | With                  | High        | 597             | 19-20 h                      | Medium     | [55]      |
| OOPS     | Without               | High        | 1838            | 15-16 h                      | Medium     | [56]      |

|                         |         |      |      |       |      |              |
|-------------------------|---------|------|------|-------|------|--------------|
| <b>BFP-based method</b> | Without | High | 1369 | 5-6 h | High | Present work |
|-------------------------|---------|------|------|-------|------|--------------|

---
