# Supplementary material for: An approach for the systematic profiling of drug-induced remodeling of RNA–RBP (RNA-binding protein) interactions
Source: Royal Society of Chemistry journal article supplement (doi:10.1039/d6ra00871b), 2026-05-19
Supplement: d6ra00871b2.xlsx [file d6ra00871b2.xlsx]

## Sheet: Cover
Table S1. List of identified RBPs from MS-444-treated and untreated HCT116 cells
Table S1a. All identified RBPs from MS-444-treated and untreated HCT116 cells
Table S1b. Identified RBPs from MS-444-treated HCT116 cells
Table S1c. Identified RBPs from untreated HCT116 cells

## Sheet: Table S1a
Table S1a. All identified RBPs from MS-444-treated and untreated HCT116 cells
Uniprot accession	Gene Symbol	Drug treatment	Non treatment
Q9UQE7	SMC3	√	√
Q8WVV9	HNRNPLL	√	√
Q9NZ01	TECR	√	√
Q6PKG0	LARP1	√	√
Q13596	SNX1	√	√
Q02818	NUCB1	√	√
O43760	SYNGR2	√	√
P46109	CRKL	√	√
P40937	RFC5	√	√
Q86UE4	MTDH	√	√
O75937	DNAJC8	√	√
Q13308	PTK7	√	√
Q8NBF2	NHLRC2	√	√
Q9BXW7	HDHD5	√	√
Q9Y6M1	IGF2BP2	√	√
Q92615	LARP4B	√	√
Q9P2R7	SUCLA2	√	√
P35250	RFC2	√	√
Q9H223	EHD4	√	√
Q9NX40	OCIAD1	√	√
P36873	PPP1CC	√	√
Q9BQ67	GRWD1	√	√
P11908	PRPS2	√	√
P07686	HEXB	√	√
Q5T8P6	RBM26	√	√
Q13601	KRR1	√	√
Q9UKF6	CPSF3	√	√
Q02978	SLC25A11	√	√
Q9BVJ6	UTP14A	√	√
P05165	PCCA	√	√
P52434	POLR2H	√	√
Q9H7Z7	PTGES2	√	√
P31350	RRM2	√	√
P54578	USP14	√	√
P00918	CA2	√	√
P11172	UMPS	√	√
P28290	ITPRID2	√	√
Q8TDN6	BRIX1	√	√
Q8WWM7	ATXN2L	√	√
P82650	MRPS22	√	√
P30566	ADSL	√	√
Q9UGI8	TES	√	√
P83916	CBX1	√	√
P30837	ALDH1B1	√	√
O75348	ATP6V1G1	√	√
P07305	H1-0	√	√
Q00169	PITPNA	√	√
Q9UDW1	UQCR10	√	√
O95336	PGLS	√	√
O00422	SAP18	√	√
P12532	CKMT1A	√	√
O76031	CLPX	√	√
P19623	SRM	√	√
Q14116	IL18	√	√
Q9NZ45	CISD1	√	√
Q15363	TMED2	√	√
Q15427	SF3B4	√	√
Q99733	NAP1L4	√	√
P62273	RPS29	√	√
P10620	MGST1	√	√
P04350	TUBB4A	√	√
Q96CT7	CCDC124	√	√
P55769	SNU13	√	√
Q92734	TFG	√	√
P68366	TUBA4A	√	√
P43307	SSR1	√	√
P28072	PSMB6	√	√
P48556	PSMD8	√	√
P28070	PSMB4	√	√
Q9Y333	LSM2	√	√
Q9NX55	HYPK	√	√
Q96HS1	PGAM5	√	√
Q9Y3B4	SF3B6	√	√
P06703	S100A6	√	√
P05161	ISG15	√	√
Q07666	KHDRBS1	√	√
P09234	SNRPC	√	√
Q12907	LMAN2	√	√
P55010	EIF5	√	√
P62314	SNRPD1	√	√
Q15843	NEDD8	√	√
Q9NR31	SAR1A	√	√
P60866	RPS20	√	√
P30049	ATP5F1D	√	√
P58546	MTPN	√	√
P56385	ATP5ME	√	√
O75531	BANF1	√	√
Q15847	ADIRF	√	√
P62857	RPS28	√	√
P84103	SRSF3	√	√
P62942	FKBP1A	√	√
P62847	RPS24	√	√
P60903	S100A10	√	√
P49207	RPL34	√	√
Q01130	SRSF2	√	√
P61224	RAP1B	√	√
P05386	RPLP1	√	√
Q3ZCM7	TUBB8	√	√
P62304	SNRPE	√	√
P61254	RPL26	√	√
Q99880	H2BC13	√	√
Q14692	BMS1	√	√
P18031	PTPN1	√	√
Q9H444	CHMP4B	√	√
Q8NI36	WDR36	√	√
Q16851	UGP2	√	√
Q9BTE6	AARSD1	√	√
P51610	HCFC1	√	√
O95453	PARN	√	√
O15258	RER1	√	√
Q92520	FAM3C	√	√
P15170	GSPT1	√	√
Q13011	ECH1	√	√
Q6DKJ4	NXN	√	√
Q99720	SIGMAR1	√	√
Q16822	PCK2	√	√
Q14683	SMC1A	√	√
Q96E11	MRRF	√	√
Q9Y512	SAMM50	√	√
P21283	ATP6V1C1	√	√
Q9NY33	DPP3	√	√
P80303	NUCB2	√	√
P26358	DNMT1	√	√
P84085	ARF5	√	√
O60749	SNX2	√	√
Q99459	CDC5L	√	√
P27144	AK4	√	√
P63151	PPP2R2A	√	√
Q13620	CUL4B	√	√
O76094	SRP72	√	√
P18859	ATP5PF	√	√
Q92890	UFD1	√	√
P37198	NUP62	√	√
Q96I25	RBM17	√	√
Q9Y3Y2	CHTOP	√	√
O95793	STAU1	√	√
P35080	PFN2	√	√
O76003	GLRX3	√	√
Q9Y4Z0	LSM4	√	√
P00568	AK1	√	√
P61011	SRP54	√	√
O95232	LUC7L3	√	√
P55145	MANF	√	√
P61160	ACTR2	√	√
Q9P0J1	PDP1	√	√
Q06203	PPAT	√	√
Q1KMD3	HNRNPUL2	√	√
P82979	SARNP	√	√
P62995	TRA2B	√	√
P53582	METAP1	√	√
P61006	RAB8A	√	√
Q96HE7	ERO1A	√	√
P46926	GNPDA1	√	√
P56134	ATP5MF	√	√
P60983	GMFB	√	√
P08754	GNAI3	√	√
P35244	RPA3	√	√
P53597	SUCLG1	√	√
Q15370	ELOB	√	√
P25685	DNAJB1	√	√
Q16698	DECR1	√	√
Q8TAT6	NPLOC4	√	√
O43488	AKR7A2	√	√
Q9Y295	DRG1	√	√
Q9P035	HACD3	√	√
P11279	LAMP1	√	√
Q15050	RRS1	√	√
Q7Z4W1	DCXR	√	√
Q9H3N1	TMX1	√	√
Q9BRA2	TXNDC17	√	√
P55795	HNRNPH2	√	√
Q99584	S100A13	√	√
P21912	SDHB	√	√
P61081	UBE2M	√	√
Q9Y383	LUC7L2	√	√
Q04837	SSBP1	√	√
Q9NX63	CHCHD3	√	√
O43670	ZNF207	√	√
O14929	HAT1	√	√
Q9HAV7	GRPEL1	√	√
Q92522	H1-10	√	√
P67870	CSNK2B	√	√
Q9H2U2	PPA2	√	√
Q8NCW5	NAXE	√	√
P49458	SRP9	√	√
P36957	DLST	√	√
Q15758	SLC1A5	√	√
P62854	RPS26	√	√
Q9H9B4	SFXN1	√	√
O00487	PSMD14	√	√
P25786	PSMA1	√	√
P52815	MRPL12	√	√
P61970	NUTF2	√	√
Q99439	CNN2	√	√
P12236	SLC25A6	√	√
Q9UK76	JPT1	√	√
P51858	HDGF	√	√
P49720	PSMB3	√	√
P10606	COX5B	√	√
Q9H0U4	RAB1B	√	√
P53999	SUB1	√	√
Q13404	UBE2V1	√	√
P43487	RANBP1	√	√
P35637	FUS	√	√
P62244	RPS15A	√	√
P35268	RPL22	√	√
P07437	TUBB	√	√
P61513	RPL37A	√	√
P42766	RPL35	√	√
P17096	HMGA1	√	√
Q86V81	ALYREF	√	√
P84077	ARF1	√	√
Q09028	RBBP4	√	√
P67809	YBX1	√	√
Q16629	SRSF7	√	√
P26447	S100A4	√	√
P62879	GNB2	√	√
Q9BYT8	NLN	√	√
O00116	AGPS	√	√
Q96TA1	NIBAN2	√	√
O60762	DPM1	√	√
Q9BZE1	MRPL37	√	√
P78344	EIF4G2	√	√
O60884	DNAJA2	√	√
Q9UBB4	ATXN10	√	√
P62633	CNBP	√	√
Q6L8Q7	PDE12	√	√
Q8NE71	ABCF1	√	√
Q9Y5X3	SNX5	√	√
P26006	ITGA3	√	√
A0MZ66	SHTN1	√	√
O15145	ARPC3	√	√
Q10713	PMPCA	√	√
Q96I99	SUCLG2	√	√
P61026	RAB10	√	√
Q9H0S4	DDX47	√	√
O95299	NDUFA10	√	√
Q12849	GRSF1	√	√
P51398	DAP3	√	√
Q9Y5K5	UCHL5	√	√
Q14166	TTLL12	√	√
Q9Y2R9	MRPS7	√	√
Q96FQ6	S100A16	√	√
P62140	PPP1CB	√	√
Q9Y285	FARSA	√	√
Q96DI7	SNRNP40	√	√
P17858	PFKL	√	√
Q9UNZ2	NSFL1C	√	√
P49756	RBM25	√	√
O43765	SGTA	√	√
P33240	CSTF2	√	√
P08559	PDHA1	√	√
P35222	CTNNB1	√	√
P13797	PLS3	√	√
P11310	ACADM	√	√
Q9UEW8	STK39	√	√
Q92896	GLG1	√	√
P06730	EIF4E	√	√
O43684	BUB3	√	√
P57088	TMEM33	√	√
P51114	FXR1	√	√
P31150	GDI1	√	√
Q16630	CPSF6	√	√
Q14019	COTL1	√	√
Q9UK22	FBXO2	√	√
P30043	BLVRB	√	√
P67775	PPP2CA	√	√
O75477	ERLIN1	√	√
Q9NR56	MBNL1	√	√
P00491	PNP	√	√
P68402	PAFAH1B2	√	√
Q15459	SF3A1	√	√
O15347	HMGB3	√	√
Q13442	PDAP1	√	√
Q15637	SF1	√	√
Q15287	RNPS1	√	√
Q15102	PAFAH1B3	√	√
P09455	RBP1	√	√
Q8IYB3	SRRM1	√	√
P30046	DDT	√	√
P22061	PCMT1	√	√
O14561	NDUFAB1	√	√
Q9NZL9	MAT2B	√	√
P10644	PRKAR1A	√	√
P60953	CDC42	√	√
Q9UHD1	CHORDC1	√	√
Q8WXF1	PSPC1	√	√
Q9Y5S9	RBM8A	√	√
P55327	TPD52	√	√
Q14444	CAPRIN1	√	√
O15144	ARPC2	√	√
P16422	EPCAM	√	√
P63220	RPS21	√	√
Q15691	MAPRE1	√	√
Q9BUF5	TUBB6	√	√
P31942	HNRNPH3	√	√
P51571	SSR4	√	√
P18085	ARF4	√	√
P49755	TMED10	√	√
Q13509	TUBB3	√	√
P20340	RAB6A	√	√
P23588	EIF4B	√	√
Q9NQC3	RTN4	√	√
O15479	MAGEB2	√	√
P63208	SKP1	√	√
P68036	UBE2L3	√	√
Q14011	CIRBP	√	√
P15531	NME1	√	√
P17931	LGALS3	√	√
P54819	AK2	√	√
Q03135	CAV1	√	√
P20290	BTF3	√	√
P52907	CAPZA1	√	√
P62136	PPP1CA	√	√
P46783	RPS10	√	√
P09012	SNRPA	√	√
P62266	RPS23	√	√
P84090	ERH	√	√
P22392	NME2	√	√
P06753	TPM3	√	√
P00403	MT-CO2	√	√
P62913	RPL11	√	√
P62263	RPS14	√	√
Q9Y3U8	RPL36	√	√
E9PAV3	NACA	√	√
P62899	RPL31	√	√
P50914	RPL14	√	√
Q13838	DDX39B	√	√
Q9Y446	PKP3	√	√
O15355	PPM1G	√	√
Q9UNX4	WDR3	√	√
Q9Y5M8	SRPRB	√	√
P28482	MAPK1	√	√
P49792	RANBP2	√	√
O00541	PES1	√	√
Q99848	EBNA1BP2	√	√
Q96G03	PGM2	√	√
P60981	DSTN	√	√
Q9NVA2	SEPTIN11	√	√
P30419	NMT1	√	√
Q9H0D6	XRN2	√	√
P29218	IMPA1	√	√
Q9BSJ8	ESYT1	√	√
Q9H4A4	RNPEP	√	√
Q9NQW7	XPNPEP1	√	√
Q8IWX8	CHERP	√	√
O43615	TIMM44	√	√
Q96P70	IPO9	√	√
Q01970	PLCB3	√	√
Q9UHB9	SRP68	√	√
P10599	TXN	√	√
Q9NUQ9	CYRIB	√	√
P84095	RHOG	√	√
Q13630	GFUS	√	√
Q92552	MRPS27	√	√
P49189	ALDH9A1	√	√
P62495	ETF1	√	√
Q9UBT2	UBA2	√	√
Q12788	TBL3	√	√
O43324	EEF1E1	√	√
Q8TCT9	HM13	√	√
P61019	RAB2A	√	√
Q96A33	CCDC47	√	√
Q13310	PABPC4	√	√
Q13148	TARDBP	√	√
O95573	ACSL3	√	√
Q96I24	FUBP3	√	√
Q12904	AIMP1	√	√
Q9Y2W1	THRAP3	√	√
P29373	CRABP2	√	√
Q9HC38	GLOD4	√	√
Q9BXJ9	NAA15	√	√
Q99436	PSMB7	√	√
Q92973	TNPO1	√	√
P13995	MTHFD2	√	√
P05091	ALDH2	√	√
Q14258	TRIM25	√	√
Q01650	SLC7A5	√	√
P05141	SLC25A5	√	√
P53618	COPB1	√	√
P04632	CAPNS1	√	√
Q13162	PRDX4	√	√
O60832	DKC1	√	√
P48444	ARCN1	√	√
Q53GQ0	HSD17B12	√	√
P13804	ETFA	√	√
P51665	PSMD7	√	√
O14737	PDCD5	√	√
Q13561	DCTN2	√	√
Q01105	SET	√	√
P61086	UBE2K	√	√
O75964	ATP5MG	√	√
Q15366	PCBP2	√	√
P31689	DNAJA1	√	√
O75821	EIF3G	√	√
P50454	SERPINH1	√	√
Q71DI3	H3C13	√	√
Q9BZZ5	API5	√	√
Q9BTT0	ANP32E	√	√
P06493	CDK1	√	√
P42126	ECI1	√	√
P63162	SNRPN	√	√
P25788	PSMA3	√	√
P63173	RPL38	√	√
P27695	APEX1	√	√
P10768	ESD	√	√
P04899	GNAI2	√	√
P20618	PSMB1	√	√
P25787	PSMA2	√	√
Q04917	YWHAH	√	√
O43399	TPD52L2	√	√
Q15185	PTGES3	√	√
P15559	NQO1	√	√
P26368	U2AF2	√	√
P19105	MYL12A	√	√
Q15056	EIF4H	√	√
Q05639	EEF1A2	√	√
O00303	EIF3F	√	√
P63000	RAC1	√	√
P62318	SNRPD3	√	√
P61981	YWHAG	√	√
P30044	PRDX5	√	√
P31946	YWHAB	√	√
P13693	TPT1	√	√
P13073	COX4I1	√	√
O43169	CYB5B	√	√
Q13185	CBX3	√	√
P08708	RPS17	√	√
P46776	RPL27A	√	√
P62888	RPL30	√	√
P62851	RPS25	√	√
P25398	RPS12	√	√
P06454	PTMA	√	√
Q16401	PSMD5	√	√
Q13155	AIMP2	√	√
Q7L0Y3	TRMT10C	√	√
Q15269	PWP2	√	√
Q9P258	RCC2	√	√
O60763	USO1	√	√
P42285	MTREX	√	√
Q14498	RBM39	√	√
P38606	ATP6V1A	√	√
O15371	EIF3D	√	√
P31040	SDHA	√	√
O43491	EPB41L2	√	√
O14745	NHERF1	√	√
O95202	LETM1	√	√
Q15008	PSMD6	√	√
P55084	HADHB	√	√
P27694	RPA1	√	√
O75475	PSIP1	√	√
Q06210	GFPT1	√	√
Q6NZI2	CAVIN1	√	√
O15427	SLC16A3	√	√
O60716	CTNND1	√	√
Q16555	DPYSL2	√	√
P62191	PSMC1	√	√
Q13451	FKBP5	√	√
Q08752	PPID	√	√
P40121	CAPG	√	√
Q6IBS0	TWF2	√	√
P07741	APRT	√	√
P08237	PFKM	√	√
Q9Y6E2	BZW2	√	√
P10515	DLAT	√	√
P30050	RPL12	√	√
O75396	SEC22B	√	√
O00571	DDX3X	√	√
O43252	PAPSS1	√	√
P51572	BCAP31	√	√
P04844	RPN2	√	√
Q9UKM9	RALY	√	√
Q12874	SF3A3	√	√
P05556	ITGB1	√	√
Q9UKK9	NUDT5	√	√
P09661	SNRPA1	√	√
Q9Y6C9	MTCH2	√	√
Q14978	NOLC1	√	√
Q9NS69	TOMM22	√	√
Q96AE4	FUBP1	√	√
P56537	EIF6	√	√
Q9NTK5	OLA1	√	√
P13489	RNH1	√	√
Q9NYF8	BCLAF1	√	√
Q96C36	PYCR2	√	√
P11177	PDHB	√	√
Q15717	ELAVL1	√	√
P16070	CD44	√	√
P37802	TAGLN2	√	√
O95433	AHSA1	√	√
P51148	RAB5C	√	√
P14550	AKR1A1	√	√
P99999	CYCS	√	√
P25789	PSMA4	√	√
Q15084	PDIA6	√	√
Q9UMX0	UBQLN1	√	√
P26583	HMGB2	√	√
P54709	ATP1B3	√	√
P42166	TMPO	√	√
P39748	FEN1	√	√
P67936	TPM4	√	√
P40429	RPL13A	√	√
P36542	ATP5F1C	√	√
P30048	PRDX3	√	√
P28066	PSMA5	√	√
Q92688	ANP32B	√	√
P09429	HMGB1	√	√
P09972	ALDOC	√	√
P61353	RPL27	√	√
P38159	RBMX	√	√
P48047	ATP5PO	√	√
P50502	ST13	√	√
P16949	STMN1	√	√
P63241	EIF5A	√	√
P62753	RPS6	√	√
P83731	RPL24	√	√
Q8WUH6	TMEM263	√	√
P39019	RPS19	√	√
P09211	GSTP1	√	√
P24534	EEF1B2	√	√
P09382	LGALS1	√	√
P31943	HNRNPH1	√	√
P49748	ACADVL	√	√
P62979	RPS27A	√	√
O00154	ACOT7	√	√
P62917	RPL8	√	√
Q16181	SEPTIN7	√	√
P31947	SFN	√	√
Q13618	CUL3	√	√
P19367	HK1	√	√
P35606	COPB2	√	√
Q96HC4	PDLIM5	√	√
P11766	ADH5	√	√
Q9UN86	G3BP2	√	√
Q9NPH2	ISYNA1	√	√
P16144	ITGB4	√	√
O43818	RRP9	√	√
Q16795	NDUFA9	√	√
O75534	CSDE1	√	√
P55265	ADAR	√	√
O94826	TOMM70	√	√
P13798	APEH	√	√
Q14157	UBAP2L	√	√
P60228	EIF3E	√	√
P23921	RRM1	√	√
P47897	QARS1	√	√
Q9NSE4	IARS2	√	√
P38117	ETFB	√	√
O43396	TXNL1	√	√
P00492	HPRT1	√	√
Q14247	CTTN	√	√
P11216	PYGB	√	√
Q13347	EIF3I	√	√
Q8IY81	FTSJ3	√	√
P12081	HARS1	√	√
P35659	DEK	√	√
O75083	WDR1	√	√
Q8NEV1	CSNK2A3	√	√
P49915	GMPS	√	√
P45974	USP5	√	√
P26196	DDX6	√	√
P20042	EIF2S2	√	√
O00232	PSMD12	√	√
P61289	PSME3	√	√
P62249	RPS16	√	√
P55036	PSMD4	√	√
P23381	WARS1	√	√
P62333	PSMC6	√	√
P31153	MAT2A	√	√
O75874	IDH1	√	√
Q9UHD8	SEPTIN9	√	√
O75947	ATP5PD	√	√
O15372	EIF3H	√	√
P47895	ALDH1A3	√	√
P00387	CYB5R3	√	√
Q7L1Q6	BZW1	√	√
P32322	PYCR1	√	√
P14923	JUP	√	√
P23528	CFL1	√	√
P18754	RCC1	√	√
Q8NBS9	TXNDC5	√	√
P49321	NASP	√	√
Q16543	CDC37	√	√
P63010	AP2B1	√	√
P84098	RPL19	√	√
P46782	RPS5	√	√
P62316	SNRPD2	√	√
P50395	GDI2	√	√
P52597	HNRNPF	√	√
P32119	PRDX2	√	√
P61088	UBE2N	√	√
P39687	ANP32A	√	√
P32969	RPL9	√	√
P62280	RPS11	√	√
P52565	ARHGDIA	√	√
P62906	RPL10A	√	√
Q01469	FABP5	√	√
P62750	RPL23A	√	√
P62829	RPL23	√	√
P26373	RPL13	√	√
Q07020	RPL18	√	√
Q07021	C1QBP	√	√
P61604	HSPE1	√	√
P05387	RPLP2	√	√
P04040	CAT	√	√
P30086	PEBP1	√	√
Q15019	SEPTIN2	√	√
Q14690	PDCD11	√	√
P33176	KIF5B	√	√
Q9NVP1	DDX18	√	√
Q9Y678	COPG1	√	√
P14735	IDE	√	√
Q9BXP5	SRRT	√	√
P27635	RPL10	√	√
Q6ZMU5	TRIM72	√	√
Q9UHX1	PUF60	√	√
Q96KP4	CNDP2	√	√
P17655	CAPN2	√	√
P05455	SSB	√	√
Q9UBQ7	GRHPR	√	√
Q9UMS4	PRPF19	√	√
Q92598	HSPH1	√	√
O43809	NUDT21	√	√
P52292	KPNA2	√	√
Q9UJZ1	STOML2	√	√
P60660	MYL6	√	√
Q02543	RPL18A	√	√
P27348	YWHAQ	√	√
O43852	CALU	√	√
P78417	GSTO1	√	√
P46779	RPL28	√	√
Q9HB71	CACYBP	√	√
P54886	ALDH18A1	√	√
P28074	PSMB5	√	√
Q07955	SRSF1	√	√
P05198	EIF2S1	√	√
P39656	DDOST	√	√
Q04760	GLO1	√	√
P54727	RAD23B	√	√
O75367	MACROH2A1	√	√
O75131	CPNE3	√	√
Q00325	SLC25A3	√	√
P60900	PSMA6	√	√
Q9Y266	NUDC	√	√
P62081	RPS7	√	√
Q15365	PCBP1	√	√
Q13283	G3BP1	√	√
Q13151	HNRNPA0	√	√
Q14103	HNRNPD	√	√
O14818	PSMA7	√	√
P00505	GOT2	√	√
P30041	PRDX6	√	√
Q99497	PARK7	√	√
P0DP25	CALM3	√	√
P62826	RAN	√	√
P15924	DSP	√	√
P55209	NAP1L1	√	√
Q9BQG0	MYBBP1A	√	√
P09525	ANXA4	√	√
Q9UQ35	SRRM2	√	√
Q9P2E9	RRBP1	√	√
P78347	GTF2I	√	√
P49591	SARS1	√	√
Q7L014	DDX46	√	√
O95373	IPO7	√	√
P46013	MKI67	√	√
O60841	EIF5B	√	√
P61158	ACTR3	√	√
P24752	ACAT1	√	√
P69849	NOMO3	√	√
O60701	UGDH	√	√
P15880	RPS2	√	√
P28331	NDUFS1	√	√
Q99714	HSD17B10	√	√
Q8N163	CCAR2	√	√
Q16643	DBN1	√	√
O43143	DHX15	√	√
Q9UNM6	PSMD13	√	√
P43686	PSMC4	√	√
P51149	RAB7A	√	√
P47756	CAPZB	√	√
Q99536	VAT1	√	√
P52209	PGD	√	√
P31930	UQCRC1	√	√
Q96AG4	LRRC59	√	√
P22695	UQCRC2	√	√
Q08945	SSRP1	√	√
P41250	GARS1	√	√
Q92945	KHSRP	√	√
P62269	RPS18	√	√
Q15181	PPA1	√	√
O96008	TOMM40	√	√
Q9Y277	VDAC3	√	√
P61313	RPL15	√	√
P29692	EEF1D	√	√
P23284	PPIB	√	√
Q02878	RPL6	√	√
P18124	RPL7	√	√
P18669	PGAM1	√	√
P62277	RPS13	√	√
Q07065	CKAP4	√	√
Q06830	PRDX1	√	√
P62910	RPL32	√	√
P07737	PFN1	√	√
P04792	HSPB1	√	√
Q8N1F7	NUP93	√	√
Q6UB35	MTHFD1L	√	√
Q96QK1	VPS35	√	√
P49419	ALDH7A1	√	√
P46060	RANGAP1	√	√
P36776	LONP1	√	√
Q15046	KARS1	√	√
Q9Y3I0	RTCB	√	√
Q14566	MCM6	√	√
P26038	MSN	√	√
Q00796	SORD	√	√
P33993	MCM7	√	√
O76021	RSL1D1	√	√
P62937	PPIA	√	√
Q9Y4L1	HYOU1	√	√
Q01518	CAP1	√	√
O43776	NARS1	√	√
P09960	LTA4H	√	√
O60664	PLIN3	√	√
P51991	HNRNPA3	√	√
Q06323	PSME1	√	√
P04181	OAT	√	√
Q13126	MTAP	√	√
P37837	TALDO1	√	√
Q9NUJ1	ABHD10	√	√
O75390	CS	√	√
P35232	PHB1	√	√
P05388	RPLP0	√	√
P62241	RPS8	√	√
P62805	H4C1	√	√
Q01082	SPTBN1	√	√
P46459	NSF	√	√
P68104	EEF1A1	√	√
P17980	PSMC3	√	√
P30153	PPP2R1A	√	√
Q13435	SF3B2	√	√
P14314	PRKCSH	√	√
Q15393	SF3B3	√	√
Q5SSJ5	HP1BP3	√	√
P41091	EIF2S3	√	√
P22087	FBL	√	√
P26599	PTBP1	√	√
Q16531	DDB1	√	√
O43390	HNRNPR	√	√
P23526	AHCY	√	√
P17844	DDX5	√	√
Q92841	DDX17	√	√
P12429	ANXA3	√	√
P40925	MDH1	√	√
P63104	YWHAZ	√	√
P45880	VDAC2	√	√
P46781	RPS9	√	√
P12277	CKB	√	√
P12004	PCNA	√	√
P07910	HNRNPC	√	√
Q14980	NUMA1	√	√
Q86XP3	DDX42	√	√
Q9NZM1	MYOF	√	√
P48147	PREP	√	√
Q99623	PHB2	√	√
P63244	RACK1	√	√
P56192	MARS1	√	√
O43242	PSMD3	√	√
P16615	ATP2A2	√	√
Q9Y262	EIF3L	√	√
P36551	CPOX	√	√
P12270	TPR	√	√
P33991	MCM4	√	√
Q9Y3F4	STRAP	√	√
Q02790	FKBP4	√	√
P06748	NPM1	√	√
P61221	ABCE1	√	√
O00231	PSMD11	√	√
P17174	GOT1	√	√
Q8NC51	SERBP1	√	√
P62195	PSMC5	√	√
Q12931	TRAP1	√	√
Q9Y5B9	SUPT16H	√	√
P08865	RPSA	√	√
Q12905	ILF2	√	√
P27797	CALR	√	√
O00299	CLIC1	√	√
Q9P2J5	LARS1	√	√
P08195	SLC3A2	√	√
Q99613	EIF3C	√	√
P53621	COPA	√	√
Q6P2Q9	PRPF8	√	√
Q8WUM4	PDCD6IP	√	√
P08133	ANXA6	√	√
Q14126	DSG2	√	√
P12814	ACTN1	√	√
Q16891	IMMT	√	√
Q99460	PSMD1	√	√
P62701	RPS4X	√	√
Q15029	EFTUD2	√	√
P25205	MCM3	√	√
P07384	CAPN1	√	√
P54577	YARS1	√	√
P43490	NAMPT	√	√
P50995	ANXA11	√	√
P33992	MCM5	√	√
P46777	RPL5	√	√
P23246	SFPQ	√	√
P09651	HNRNPA1	√	√
P40926	MDH2	√	√
P27824	CANX	√	√
P04843	RPN1	√	√
Q7KZF4	SND1	√	√
P00338	LDHA	√	√
P46087	NOP2	√	√
P04083	ANXA1	√	√
P00367	GLUD1	√	√
Q13200	PSMD2	√	√
Q01813	PFKP	√	√
P22234	PAICS	√	√
P40939	HADHA	√	√
P11387	TOP1	√	√
P41252	IARS1	√	√
Q9Y230	RUVBL2	√	√
Q9Y617	PSAT1	√	√
P36578	RPL4	√	√
P43243	MATR3	√	√
Q9Y265	RUVBL1	√	√
P62424	RPL7A	√	√
O60506	SYNCRIP	√	√
P61247	RPS3A	√	√
P05783	KRT18	√	√
P22626	HNRNPA2B1	√	√
Q16658	FSCN1	√	√
Q03252	LMNB2	√	√
P07195	LDHB	√	√
Q00839	HNRNPU	√	√
P55884	EIF3B	√	√
P11413	G6PD	√	√
P28838	LAP3	√	√
P35221	CTNNA1	√	√
P61978	HNRNPK	√	√
O43175	PHGDH	√	√
P14866	HNRNPL	√	√
Q04637	EIF4G1	√	√
P35998	PSMC2	√	√
P38919	EIF4A3	√	√
Q15233	NONO	√	√
P12268	IMPDH2	√	√
Q14974	KPNB1	√	√
P39023	RPL3	√	√
P34897	SHMT2	√	√
P11940	PABPC1	√	√
P08758	ANXA5	√	√
P21796	VDAC1	√	√
P49411	TUFM	√	√
P20700	LMNB1	√	√
Q13813	SPTAN1	√	√
O00410	IPO5	√	√
O00567	NOP56	√	√
P40227	CCT6A	√	√
Q99873	PRMT1	√	√
P60842	EIF4A1	√	√
P23396	RPS3	√	√
P26641	EEF1G	√	√
O14980	XPO1	√	√
P27816	MAP4	√	√
P14868	DARS1	√	√
Q86VP6	CAND1	√	√
P62258	YWHAE	√	√
P04075	ALDOA	√	√
Q9UQ80	PA2G4	√	√
P06744	GPI	√	√
P52272	HNRNPM	√	√
P60174	TPI1	√	√
P29401	TKT	√	√
P08243	ASNS	√	√
P27708	CAD	√	√
P04406	GAPDH	√	√
P15311	EZR	√	√
P06576	ATP5F1B	√	√
P31939	ATIC	√	√
Q14697	GANAB	√	√
O75533	SF3B1	√	√
P26639	TARS1	√	√
O75369	FLNB	√	√
P53396	ACLY	√	√
P55786	NPEPPS	√	√
P02786	TFRC	√	√
P13010	XRCC5	√	√
P07237	P4HB	√	√
P22102	GART	√	√
P49588	AARS1	√	√
P26640	VARS1	√	√
P25705	ATP5F1A	√	√
P31948	STIP1	√	√
P49368	CCT3	√	√
P00558	PGK1	√	√
Q9NR30	DDX21	√	√
Q9Y490	TLN1	√	√
P13667	PDIA4	√	√
P54136	RARS1	√	√
P07814	EPRS1	√	√
Q08211	DHX9	√	√
P48643	CCT5	√	√
Q13263	TRIM28	√	√
Q12906	ILF3	√	√
P50991	CCT4	√	√
P06733	ENO1	√	√
P17987	TCP1	√	√
Q14152	EIF3A	√	√
P11586	MTHFD1	√	√
P30101	PDIA3	√	√
P11142	HSPA8	√	√
Q99832	CCT7	√	√
P18206	VCL	√	√
P07900	HSP90AA1	√	√
P09874	PARP1	√	√
P78371	CCT2	√	√
Q14204	DYNC1H1	√	√
Q92616	GCN1	√	√
P34932	HSPA4	√	√
P07355	ANXA2	√	√
P19338	NCL	√	√
P08238	HSP90AB1	√	√
P05023	ATP1A1	√	√
P55072	VCP	√	√
P38646	HSPA9	√	√
P22314	UBA1	√	√
P50990	CCT8	√	√
Q02952	AKAP12	√	√
O75643	SNRNP200	√	√
P46940	IQGAP1	√	√
P12956	XRCC6	√	√
O43707	ACTN4	√	√
P11021	HSPA5	√	√
P14618	PKM	√	√
P10809	HSPD1	√	√
P14625	HSP90B1	√	√
P02545	LMNA	√	√
Q00610	CLTC	√	√
P13639	EEF2	√	√
P42704	LRPPRC	√	√
P21333	FLNA	√	√
P35579	MYH9	√	√
P78527	PRKDC	√	√
P49327	FASN	√	√
Q15149	PLEC	√	√
Q09666	AHNAK	√	√
P28288	ABCD3		√
Q9NQG5	RPRD1B		√
P52306	RAP1GDS1		√
Q9H8Y8	GORASP2		√
Q92797	SYMPK		√
Q9P0M6	MACROH2A2		√
P49770	EIF2B2		√
O95292	VAPB		√
Q14008	CKAP5		√
Q8WW12	PCNP		√
Q8TED0	UTP15		√
P29966	MARCKS		√
Q13045	FLII		√
Q9UNH7	SNX6		√
P09497	CLTB		√
Q5VTR2	RNF20		√
P17301	ITGA2		√
Q8WX93	PALLD		√
P48729	CSNK1A1		√
Q6RFH5	WDR74		√
Q96EE3	SEH1L		√
Q7Z6Z7	HUWE1		√
O94973	AP2A2		√
O00148	DDX39A		√
Q9BXY0	MAK16		√
Q13895	BYSL		√
P55735	SEC13		√
Q9Y2P8	RCL1		√
Q16186	ADRM1		√
O94905	ERLIN2		√
Q7Z2W9	MRPL21		√
Q13418	ILK		√
Q9BWJ5	SF3B5		√
Q07866	KLC1		√
O43678	NDUFA2		√
Q6DKI1	RPL7L1		√
Q96FV2	SCRN2		√
Q96CS3	FAF2		√
Q9C005	DPY30		√
P09110	ACAA1		√
P17812	CTPS1		√
Q9NY93	DDX56		√
P51570	GALK1		√
P24928	POLR2A		√
Q9NVS9	PNPO		√
P15374	UCHL3		√
Q9UIG0	BAZ1B		√
Q9UN37	VPS4A		√
P49903	SEPHS1		√
Q13740	ALCAM		√
Q9BUH6	PAXX		√
Q9UKX7	NUP50		√
O15116	LSM1		√
Q96CW1	AP2M1		√
P57740	NUP107		√
Q14677	CLINT1		√
Q9Y244	POMP		√
P07948	LYN		√
Q9UBS4	DNAJB11		√
Q96A35	MRPL24		√
Q9Y5L4	TIMM13		√
Q8WWH5	TRUB1		√
Q93009	USP7		√
P48163	ME1		√
Q8NI27	THOC2		√
O96019	ACTL6A		√
Q9H3K2	GHITM		√
P49247	RPIA		√
Q15061	WDR43		√
O94919	ENDOD1		√
P53985	SLC16A1		√
Q9HD42	CHMP1A		√
Q9H1K4	SLC25A18		√
Q14651	PLS1		√
Q9NXG2	THUMPD1		√
Q9H074	PAIP1		√
P62306	SNRPF		√
P46379	BAG6		√
Q92621	NUP205		√
P05026	ATP1B1		√
P23229	ITGA6		√
O00743	PPP6C		√
Q13564	NAE1		√
Q8NFV4	ABHD11		√
Q8IV08	PLD3		√
Q09161	NCBP1		√
Q9UKV3	ACIN1		√
O60869	EDF1		√
Q9ULA0	DNPEP		√
Q9BTV4	TMEM43		√
P30740	SERPINB1		√
Q02218	OGDH		√
P14406	COX7A2		√
O60493	SNX3		√
P40616	ARL1		√
P04179	SOD2		√
Q16718	NDUFA5		√
Q9H4M9	EHD1		√
P48637	GSS		√
Q14137	BOP1		√
P30536	TSPO		√
Q99829	CPNE1		√
P12955	PEPD		√
Q92979	EMG1		√
P24539	ATP5PB		√
Q8TB61	SLC35B2		√
O14579	COPE		√
P19404	NDUFV2		√
Q15417	CNN3		√
Q92530	PSMF1		√
Q52LJ0	FAM98B		√
Q9Y6M9	NDUFB9		√
O60502	OGA		√
Q6YN16	HSDL2		√
Q9BTE3	MCMBP		√
Q9NP97	DYNLRB1		√
Q9BZF1	OSBPL8		√
Q96IX5	ATP5MK		√
P54725	RAD23A		√
Q96S97	MYADM		√
Q9Y3B9	RRP15		√
P17480	UBTF		√
E9PRG8	C11orf98		√
Q96A26	FAM162A		√
Q01081	U2AF1		√
P61106	RAB14		√
Q92572	AP3S1		√
P56545	CTBP2		√
P63098	PPP3R1		√
Q9UBQ5	EIF3K		√
Q16576	RBBP7		√
O75438	NDUFB1		√
O75940	SMNDC1		√
P47813	EIF1AX		√
Q05519	SRSF11		√
O15173	PGRMC2		√
Q96FJ2	DYNLL2		√
P63279	UBE2I		√
P47985	UQCRFS1		√
O15212	PFDN6		√
P47914	RPL29		√
Q15836	VAMP3		√
Q01844	EWSR1		√
P08574	CYC1		√
P00441	SOD1		√
P62328	TMSB4X		√
Q9BQE3	TUBA1C		√
Q16878	CDO1		√
P20674	COX5A		√
P46778	RPL21		√
P42677	RPS27		√
Q16778	H2BC21		√
P16403	H1-2		√
Q15437	SEC23B		√
Q8WVM8	SCFD1		√
Q9BYN0	SRXN1		√
P30876	POLR2B		√
P37235	HPCAL1		√
P10155	RO60		√
Q86YP4	GATAD2A		√
Q9NQT4	EXOSC5		√
Q5JTH9	RRP12		√
P52788	SMS		√
O43837	IDH3B		√
Q15125	EBP		√
Q6NXG1	ESRP1		√
P78406	RAE1		√
Q9H845	ACAD9		√
Q9Y4W6	AFG3L2		√
Q8IX12	CCAR1		√
P51648	ALDH3A2		√
Q15397	PUM3		√
P07858	CTSB		√
Q13242	SRSF9		√
P35237	SERPINB6		√
Q9NUU7	DDX19A		√
Q99627	COPS8		√
O60684	KPNA6		√
Q99598	TSNAX		√
Q9Y3B3	TMED7		√
Q9BQA1	WDR77		√
P30084	ECHS1		√
P30085	CMPK1		√
P01116	KRAS		√
Q8N684	CPSF7		√
Q16762	TST		√
Q12792	TWF1		√
P22570	FDXR		√
Q13428	TCOF1		√
Q07960	ARHGAP1		√
Q13247	SRSF6		√
P63096	GNAI1		√
Q9NY12	GAR1		√
Q96DB5	RMDN1		√
O95456	PSMG1		√
P29317	EPHA2		√
Q15005	SPCS2		√
P21399	ACO1		√
Q9NP72	RAB18		√
Q9Y224	RTRAF		√
Q13557	CAMK2D		√
Q99986	VRK1		√
O75607	NPM3		√
O95782	AP2A1		√
Q86U42	PABPN1		√
P36405	ARL3		√
Q14257	RCN2		√
O14949	UQCRQ		√
P45973	CBX5		√
P48739	PITPNB		√
Q969H8	MYDGF		√
O14617	AP3D1		√
P23193	TCEA1		√
Q5JTV8	TOR1AIP1		√
O60925	PFDN1		√
Q9GZL7	WDR12		√
P07602	PSAP		√
O95831	AIFM1		√
P30520	ADSS2		√
Q9HDC9	APMAP		√
Q99471	PFDN5		√
P61619	SEC61A1		√
Q9HB07	MYG1		√
Q6P5R6	RPL22L1		√
Q9BVK6	TMED9		√
P61803	DAD1		√
P21926	CD9		√
Q9GZT3	SLIRP		√
Q96T76	MMS19		√
Q9P0L0	VAPA		√
P37108	SRP14		√
P07108	DBI		√
P30040	ERP29		√
Q9NW13	RBM28		√
Q14203	DCTN1		√
P23368	ME2		√
Q9UKY7	CDV3		√
P14927	UQCRB		√
Q96GQ7	DDX27		√
P61201	COPS2		√
Q99798	ACO2		√
Q13177	PAK2		√
P52888	THOP1		√
Q9BZK7	TBL1XR1		√
Q14694	USP10		√
P50851	LRBA		√
O43747	AP1G1		√
Q05682	CALD1		√
Q9H307	PNN		√
Q8TEX9	IPO4		√
Q14558	PRPSAP1		√
Q9Y3D9	MRPS23		√
Q9Y221	NIP7		√
O75306	NDUFS2		√
Q92900	UPF1		√
O43681	GET3		√
O00203	AP3B1		√
Q92769	HDAC2		√
Q9Y281	CFL2		√
Q9NX58	LYAR		√
Q9NR12	PDLIM7		√
Q99615	DNAJC7		√
Q9NUQ2	AGPAT5		√
Q99961	SH3GL1		√
Q9BVP2	GNL3		√
P61758	VBP1		√
P59998	ARPC4		√
O14744	PRMT5		√
P22307	SCP2		√
Q16881	TXNRD1		√
P26885	FKBP2		√
P14324	FDPS		√
P24666	ACP1		√
P17612	PRKACA		√
P46977	STT3A		√
Q96A72	MAGOHB		√
P07954	FH		√
P11233	RALA		√
P60891	PRPS1		√
P04080	CSTB		√
Q15631	TSN		√
P33316	DUT		√
Q9UHV9	PFDN2		√
O43847	NRDC		√
Q2TAY7	SMU1		√
Q9UIJ7	AK3		√
Q06124	PTPN11		√
Q9H0C8	ILKAP		√
Q00059	TFAM		√
Q8WXX5	DNAJC9		√
Q9C0C9	UBE2O		√
Q15785	TOMM34		√
P19525	EIF2AK2		√
Q96PK6	RBM14		√
Q92499	DDX1		√
P35241	RDX		√
Q9BUL8	PDCD10		√
P20810	CAST		√
P49257	LMAN1		√
P48735	IDH2		√
O15143	ARPC1B		√
P49589	CARS1		√
P00390	GSR		√
P61586	RHOA		√
Q99729	HNRNPAB		√
P50570	DNM2		√
P41227	NAA10		√
Q9NTZ6	RBM12		√
Q8TEM1	NUP210		√
Q00341	HDLBP		√
Q9NSD9	FARSB		√
Q9H583	HEATR1		√
O14776	TCERG1		√
Q15293	RCN1		√
Q9Y2X3	NOP58		√
P08621	SNRNP70		√
Q9P287	BCCIP		√
P36871	PGM1		√
Q9BUJ2	HNRNPUL1		√
P35613	BSG		√
P18621	RPL17		√
Q15907	RAB11B		√
Q9H0A0	NAT10		√
Q9NVI7	ATAD3A		√
P51659	HSD17B4		√
P43304	GPD2		√
Q8N392	ARHGAP18		√
P0DMV9	HSPA1B		√
O75494	SRSF10	√
P14174	MIF	√
Q8IUD2	ERC1	√
Q9NV06	DCAF13	√
P82673	MRPS35	√
Q8NBJ5	COLGALT1	√
Q14669	TRIP12	√
Q9NTJ3	SMC4	√
Q9UQB8	BAIAP2	√
Q96RP9	GFM1	√
Q9H7B2	RPF2	√
P01111	NRAS	√
O94979	SEC31A	√
Q8TCS8	PNPT1	√
Q86X55	CARM1	√
Q9Y6E0	STK24	√
Q9H9J2	MRPL44	√
Q8WWY3	PRPF31	√
Q9Y3T9	NOC2L	√
Q92600	CNOT9	√
Q9H1E3	NUCKS1	√
Q86UP2	KTN1	√
P34896	SHMT1	√
P61916	NPC2	√
Q9BYG3	NIFK	√
O00592	PODXL	√
P55809	OXCT1	√
P61225	RAP2B	√
O00505	KPNA3	√
Q6P2E9	EDC4	√
Q9H6F5	CCDC86	√
Q53H82	LACTB2	√
Q13405	MRPL49	√
P07339	CTSD	√
Q96FW1	OTUB1	√
O95394	PGM3	√
Q9NWH9	SLTM	√
Q9UHB6	LIMA1	√
P82933	MRPS9	√
Q9Y314	NOSIP	√
P55263	ADK	√
Q9H3U1	UNC45A	√
Q9BWD1	ACAT2	√
Q9Y3B7	MRPL11	√
P13533	MYH6	√
O95168	NDUFB4	√
P49406	MRPL19	√
P06737	PYGL	√
P61960	UFM1	√
O95881	TXNDC12	√
Q9UBX3	SLC25A10	√
P41567	EIF1	√
Q71UI9	H2AZ2	√
O00264	PGRMC1	√
P49721	PSMB2	√
Q8TEQ6	GEMIN5	√
Q9UHY7	ENOPH1	√
Q9UJS0	SLC25A13	√
O00151	PDLIM1	√
Q9Y6Y8	SEC23IP	√
P18583	SON	√
Q7L576	CYFIP1	√
O75400	PRPF40A	√
P19388	POLR2E	√
Q8TAQ2	SMARCC2	√
Q9H936	SLC25A22	√
Q9H8H0	NOL11	√
O75489	NDUFS3	√
P35249	RFC4	√
Q9Y2Z0	SUGT1	√
Q9NYL9	TMOD3	√
Q9NPJ3	ACOT13	√
Q9UMR2	DDX19B	√
Q15020	SART3	√
Q9BZE4	GTPBP4	√
Q9Y2L1	DIS3	√
Q9ULC5	ACSL5	√
O75694	NUP155	√
Q8WTT2	NOC3L	√
P62491	RAB11A	√
P50213	IDH3A	√
P20073	ANXA7	√
P08134	RHOC	√
Q15369	ELOC	√
Q14847	LASP1	√
P42167	TMPO	√
Q8N1G4	LRRC47	√
P09622	DLD	√
O14979	HNRNPDL	√
O60264	SMARCA5	√
P55060	CSE1L	√
P49736	MCM2	√

## Sheet: Table S1b
Table S1b. Identified RBPs from MS-444-treated HCT116 cells
Uniprot accession	Gene Symbol	-Log(BH-ajusted P-value）	Log2(Difference)	Unique peptides	Log2(Intensity.L.S1)	Log2(Intensity.L.S2)	Log2(Intensity.L.S3)	Log2(Intensity.H.S1)	Log2(Intensity.H.S2)	Log2(Intensity.H.S3)
Q8WVV9	HNRNPLL	4.89674	1.44344	2	23.8968	23.7596	23.9434	22.4232	22.4232	22.4232
Q9UQE7	SMC3	2.66749	1.55072	2	23.7535	23.7535	24.4147	22.4232	22.4232	22.4232
P62879	GNB2	3.70047	1.57404	2	29.1474	29.1573	28.823	27.5685	27.4185	27.4185
P31350	RRM2	2.94095	1.65464	2	24.4761	23.8787	23.8787	22.4232	22.4232	22.4232
O75494	SRSF10	3.27855	1.81126	2	24.3661	23.8819	24.4552	22.4232	22.4232	22.4232
O76094	SRP72	2.26234	1.86486	2	23.6078	24.575	24.6813	22.4232	22.4232	22.4232
P14174	MIF	3.9085	1.86638	2	31.045	31.4762	31.2657	29.397	29.355	29.4358
Q8IUD2	ERC1	7.98325	2.01325	2	24.4234	24.4234	24.4624	22.4232	22.4232	22.4232
P11172	UMPS	3.91942	2.01515	2	24.3024	24.3024	24.7101	22.4232	22.4232	22.4232
Q9NV06	DCAF13	3.26955	2.03273	2	24.8578	24.2549	24.2549	22.4232	22.4232	22.4232
Q99720	SIGMAR1	2.85427	2.04516	2	24.9871	24.209	24.209	22.4232	22.4232	22.4232
Q6DKJ4	NXN	3.89772	2.07525	2	24.3567	24.7819	24.3567	22.4232	22.4232	22.4232
P82673	MRPS35	2.884	2.09174	2	24.2544	24.2544	25.036	22.4232	22.4232	22.4232
Q8NBJ5	COLGALT1	3.85861	2.09908	2	24.3756	24.3756	24.8156	22.4232	22.4232	22.4232
Q96TA1	NIBAN2	3.18451	2.27277	2	25.1686	24.4596	24.4596	22.4232	22.4232	22.4232
Q9Y3Y2	CHTOP	2.10377	2.30935	2	25.2034	25.1986	23.7956	22.4232	22.4232	22.4232
Q02818	NUCB1	3.96189	2.31603	2	24.5045	24.6882	25.0248	22.4232	22.4232	22.4232
Q9BTE6	AARSD1	3.80316	2.34167	2	24.9883	24.8727	24.4335	22.4232	22.4232	22.4232
O15258	RER1	7.74835	2.37439	2	24.78	24.78	24.8326	22.4232	22.4232	22.4232
Q14669	TRIP12	2.72263	2.38612	2	24.4814	24.4814	25.465	22.4232	22.4232	22.4232
Q9NTJ3	SMC4	6.40348	2.41319	2	24.7977	24.7977	24.9137	22.4232	22.4232	22.4232
O15371	EIF3D	3.3969	2.41853	2	25.0103	25.1125	24.4022	22.4232	22.4232	22.4232
Q92615	LARP4B	2.66994	2.42473	2	25.5361	24.5038	24.5038	22.4232	22.4232	22.4232
P84085	ARF5	2.10974	2.42594	2	24.3589	24.3589	25.8295	22.4232	22.4232	22.4232
Q9UQB8	BAIAP2	2.36976	2.51197	2	25.7944	24.5055	24.5055	22.4232	22.4232	22.4232
Q96RP9	GFM1	4.48188	2.54826	2	24.8476	25.2191	24.8476	22.4232	22.4232	22.4232
Q9H7B2	RPF2	2.76476	2.60106	2	25.5905	25.0925	24.3897	22.4232	22.4232	22.4232
Q8NE71	ABCF1	10.9279	2.60187	2	25.022	25.022	25.0312	22.4232	22.4232	22.4232
P01111	NRAS	6.87328	2.61687	2	25.008	25.104	25.008	22.4232	22.4232	22.4232
Q13618	CUL3	2.85353	2.64648	2	25.7403	24.7647	24.7039	22.4232	22.4232	22.4232
O94979	SEC31A	7.72538	2.65063	2	25.054	25.054	25.1135	22.4232	22.4232	22.4232
Q8TCS8	PNPT1	2.41911	2.69033	2	26.0056	24.6674	24.6674	22.4232	22.4232	22.4232
Q13596	SNX1	3.89468	2.70549	2	24.9436	24.9436	25.4988	22.4232	22.4232	22.4232
P31150	GDI1	4.12622	2.70893	2	24.8202	25.3635	25.2126	22.4232	22.4232	22.4232
Q86X55	CARM1	5.90407	2.72481	2	25.2644	25.0897	25.0897	22.4232	22.4232	22.4232
Q9Y6E0	STK24	2.99428	2.77247	2	24.8725	24.8725	25.8419	22.4232	22.4232	22.4232
O60884	DNAJA2	4.18441	2.7986	2	25.0601	25.0601	25.5452	22.4232	22.4232	22.4232
Q96DI7	SNRNP40	4.42274	2.84302	2	25.5522	25.1232	25.1232	22.4232	22.4232	22.4232
Q86UE4	MTDH	8.81035	2.87161	2	25.2833	25.3178	25.2833	22.4232	22.4232	22.4232
Q9H9J2	MRPL44	3.64435	2.89016	2	24.9221	25.7151	25.3028	22.4232	22.4232	22.4232
Q9NZ45	CISD1	4.97977	2.89035	2	25.2082	25.2082	25.5241	22.4232	22.4232	22.4232
Q8WWY3	PRPF31	17.439	2.89329	2	25.3166	25.3164	25.3164	22.4232	22.4232	22.4232
Q9UNZ2	NSFL1C	2.17347	2.89747	2	24.6112	26.4298	24.9209	22.4232	22.4232	22.4232
Q6L8Q7	PDE12	3.09999	2.91981	2	25.0236	25.0236	25.9817	22.4232	22.4232	22.4232
P54578	USP14	2.36481	2.93153	2	24.8517	26.3606	24.8517	22.4232	22.4232	22.4232
Q9Y3T9	NOC2L	3.52775	2.93448	2	25.1087	25.8556	25.1087	22.4232	22.4232	22.4232
Q92600	CNOT9	2.40392	2.93939	2	25.1413	26.3036	24.6428	22.4232	22.4232	22.4232
Q9H1E3	NUCKS1	3.31457	2.93995	2	25.0801	25.0801	25.9291	22.4232	22.4232	22.4232
Q86UP2	KTN1	3.39645	2.95619	2	25.9215	25.1083	25.1083	22.4232	22.4232	22.4232
Q5T8P6	RBM26	3.40679	2.95779	2	25.9201	25.1114	25.1114	22.4232	22.4232	22.4232
Q1KMD3	HNRNPUL2	3.13376	2.97264	2	25.0772	25.0772	26.0331	22.4232	22.4232	22.4232
P37198	NUP62	5.37217	2.98831	2	25.3739	25.577	25.2836	22.4232	22.4232	22.4232
P34896	SHMT1	2.97734	2.9929	2	24.96	26.1094	25.1788	22.4232	22.4232	22.4232
P61916	NPC2	2.90174	2.99366	2	24.893	26.1287	25.2287	22.4232	22.4232	22.4232
O95232	LUC7L3	2.84457	3.0099	2	25.0491	25.0491	26.201	22.4232	22.4232	22.4232
P36873	PPP1CC	5.58498	3.01504	2	25.5545	25.2915	25.4686	22.4232	22.4232	22.4232
Q9P0J1	PDP1	4.66396	3.08384	2	25.3721	25.7768	25.3721	22.4232	22.4232	22.4232
Q9BYG3	NIFK	2.67684	3.09318	2	26.3873	25.0153	25.1464	22.4232	22.4232	22.4232
Q9H223	EHD4	3.52636	3.09418	2	25.2546	25.2546	26.0429	22.4232	22.4232	22.4232
Q96I25	RBM17	3.15694	3.0945	2	25.1409	25.2428	26.1693	22.4232	22.4232	22.4232
O75937	DNAJC8	4.35885	3.11328	2	25.3739	25.3739	25.8615	22.4232	22.4232	22.4232
O00592	PODXL	4.99406	3.12165	2	25.432	25.7704	25.432	22.4232	22.4232	22.4232
P55809	OXCT1	6.43313	3.12269	2	25.487	25.507	25.6436	22.4232	22.4232	22.4232
Q9BQ67	GRWD1	2.49484	3.15209	2	24.6951	25.6098	26.4209	22.4232	22.4232	22.4232
P61225	RAP2B	6.47405	3.16346	2	25.5379	25.5379	25.684	22.4232	22.4232	22.4232
P51398	DAP3	4.66503	3.16986	2	25.8701	25.4545	25.4545	22.4232	22.4232	22.4232
O00422	SAP18	3.27788	3.18507	2	25.692	26.0089	26.0087	22.4232	22.4232	23.3081
O00505	KPNA3	7.7283	3.21055	2	25.6097	25.6097	25.6817	22.4232	22.4232	22.4232
P07686	HEXB	3.44687	3.21103	2	25.3484	26.2058	25.3484	22.4232	22.4232	22.4232
Q10713	PMPCA	5.16406	3.23982	2	25.7825	25.755	25.4514	22.4232	22.4232	22.4232
Q9BZE1	MRPL37	4.57428	3.25581	2	25.8763	25.3846	25.776	22.4232	22.4232	22.4232
Q9P2R7	SUCLA2	2.4268	3.27025	2	25.1538	26.7727	25.1538	22.4232	22.4232	22.4232
Q6P2E9	EDC4	2.20352	3.27286	2	26.3767	24.4533	26.2581	22.4232	22.4232	22.4232
Q9BVJ6	UTP14A	2.71638	3.2941	2	25.0569	25.5068	26.5881	22.4232	22.4232	22.4232
O43488	AKR7A2	4.35206	3.29521	2	25.4812	26.0544	25.6195	22.4232	22.4232	22.4232
O75348	ATP6V1G1	7.51662	3.30346	2	25.7824	25.6988	25.6988	22.4232	22.4232	22.4232
Q9H6F5	CCDC86	3.81242	3.31061	2	26.2091	25.4979	25.4943	22.4232	22.4232	22.4232
P10620	MGST1	3.57729	3.31219	2	26.2813	25.4624	25.4624	22.4232	22.4232	22.4232
Q15102	PAFAH1B3	3.35197	3.31464	2	26.3619	25.4258	25.4258	22.4232	22.4232	22.4232
P80303	NUCB2	3.60627	3.3327	2	25.5388	25.4362	26.2926	22.4232	22.4232	22.4232
O43760	SYNGR2	9.21912	3.35325	2	25.7658	25.7658	25.7977	22.4232	22.4232	22.4232
P08754	GNAI3	5.46571	3.35641	2	25.7514	25.9518	25.6356	22.4232	22.4232	22.4232
Q53H82	LACTB2	6.65894	3.36862	2	25.885	25.7452	25.7452	22.4232	22.4232	22.4232
Q13405	MRPL49	2.35211	3.38828	2	25.2254	25.2254	26.9835	22.4232	22.4232	22.4232
Q14166	TTLL12	8.85274	3.3974	2	25.8073	25.8073	25.8471	22.4232	22.4232	22.4232
Q9UKF6	CPSF3	3.19674	3.40055	2	26.1007	26.244	25.1265	22.4232	22.4232	22.4232
P67775	PPP2CA	3.15905	3.4274	2	25.6451	26.5543	25.3523	22.4232	22.4232	22.4232
P07339	CTSD	5.11062	3.45071	2	26.0853	25.8533	25.6831	22.4232	22.4232	22.4232
Q14116	IL18	4.71123	3.48829	2	26.1978	25.7004	25.8361	22.4232	22.4232	22.4232
Q02978	SLC25A11	2.01403	3.49128	2	24.5144	26.1422	27.0868	22.4232	22.4232	22.4232
P30837	ALDH1B1	3.51579	3.50676	2	25.6303	25.6303	26.5293	22.4232	22.4232	22.4232
Q9H4A4	RNPEP	3.94324	3.50904	2	25.6989	25.6989	26.3989	22.4232	22.4232	22.4232
P42285	MTREX	4.99144	3.51847	2	26.1963	25.8143	25.8143	22.4232	22.4232	22.4232
Q96FW1	OTUB1	3.36724	3.52234	2	25.6169	25.6169	26.6027	22.4232	22.4232	22.4232
P29373	CRABP2	3.71661	3.54883	2	26.5105	25.7223	25.6832	22.4232	22.4232	22.4232
Q8WWM7	ATXN2L	3.07133	3.57825	2	26.7977	25.6033	25.6033	22.4232	22.4232	22.4232
P04350	TUBB4A	3.43908	3.58826	2	26.5645	25.4531	26.0167	22.4232	22.4232	22.4232
Q99439	CNN2	2.70589	3.62237	2	25.5427	27.0512	25.5427	22.4232	22.4232	22.4232
Q13620	CUL4B	3.09247	3.64287	2	26.4108	25.268	26.5193	22.4232	22.4232	22.4232
Q9BYT8	NLN	4.4702	3.64902	2	26.4293	25.8936	25.8936	22.4232	22.4232	22.4232
P30566	ADSL	2.55449	3.66087	2	27.1998	25.5262	25.5262	22.4232	22.4232	22.4232
O95394	PGM3	3.24451	3.66189	2	25.7176	26.8199	25.7176	22.4232	22.4232	22.4232
Q9NWH9	SLTM	4.47883	3.68319	2	26.465	25.927	25.927	22.4232	22.4232	22.4232
Q9NUQ9	CYRIB	2.60824	3.68404	2	25.5642	25.5642	27.1933	22.4232	22.4232	22.4232
Q13308	PTK7	2.54853	3.68565	2	27.1851	25.2799	25.8615	22.4232	22.4232	22.4232
Q9NX40	OCIAD1	4.68615	3.68655	2	26.4281	25.9505	25.9505	22.4232	22.4232	22.4232
P13798	APEH	5.73013	3.69837	2	26.0342	26.0342	26.2963	22.4232	22.4232	22.4232
Q9UDW1	UQCR10	5.54462	3.70176	2	26.0276	26.3196	26.0276	22.4232	22.4232	22.4232
Q9UHB6	LIMA1	2.89135	3.72068	2	25.8027	27.0569	25.5719	22.4232	22.4232	22.4232
P82933	MRPS9	4.92655	3.72252	2	26.101	26.4071	25.9289	22.4232	22.4232	22.4232
Q9Y5M8	SRPRB	5.01816	3.72445	2	26.2815	25.8822	26.2791	22.4232	22.4232	22.4232
Q9Y512	SAMM50	3.73731	3.76419	2	26.6987	25.724	26.1394	22.4232	22.4232	22.4232
P63151	PPP2R2A	5.0698	3.76473	2	26.0577	26.0577	26.4483	22.4232	22.4232	22.4232
Q16698	DECR1	5.64224	3.78107	2	26.39	26.1362	26.0865	22.4232	22.4232	22.4232
Q9Y314	NOSIP	3.0641	3.80845	2	25.806	27.0828	25.806	22.4232	22.4232	22.4232
P55263	ADK	5.23152	3.81078	2	26.474	26.1139	26.1139	22.4232	22.4232	22.4232
P30419	NMT1	3.55016	3.81872	2	25.7135	26.8181	26.1941	22.4232	22.4232	22.4232
Q15370	ELOB	2.11015	3.82163	2	26.6393	24.7548	27.3403	22.4232	22.4232	22.4232
Q14692	BMS1	3.61792	3.84881	2	26.8192	26.2496	25.7471	22.4232	22.4232	22.4232
Q9H3U1	UNC45A	4.65947	3.86335	2	26.6253	26.1171	26.1171	22.4232	22.4232	22.4232
Q9BWD1	ACAT2	11.0308	3.86461	2	26.2964	26.2835	26.2835	22.4232	22.4232	22.4232
Q12907	LMAN2	3.78857	3.8732	2	25.851	26.2195	26.8186	22.4232	22.4232	22.4232
Q9NX55	HYPK	2.43584	3.87783	2	25.0312	26.8631	27.0086	22.4232	22.4232	22.4232
P18859	ATP5PF	3.92272	3.89648	2	26.0891	26.027	26.8429	22.4232	22.4232	22.4232
Q9Y2W1	THRAP3	3.2299	3.90141	2	25.9297	25.9297	27.1144	22.4232	22.4232	22.4232
Q96CT7	CCDC124	3.49532	3.90386	2	26.8809	26.3847	25.7155	22.4232	22.4232	22.4232
Q8TDN6	BRIX1	3.24681	3.90973	2	25.9411	27.1164	25.9411	22.4232	22.4232	22.4232
P49189	ALDH9A1	7.21461	3.9101	2	26.4118	26.2923	26.2958	22.4232	22.4232	22.4232
P20340	RAB6A	4.46555	3.94755	2	26.177	26.7581	26.177	22.4232	22.4232	22.4232
P62273	RPS29	4.18583	3.9552	2	26.6551	25.9254	26.5546	22.4232	22.4232	22.4232
Q9Y3B7	MRPL11	5.71792	3.9715	2	26.3002	26.3002	26.5836	22.4232	22.4232	22.4232
Q13561	DCTN2	3.86946	3.97811	2	26.5013	25.8808	26.8218	22.4232	22.4232	22.4232
P13533	MYH6	4.96326	3.98253	2	30.4086	30.4086	30.8299	26.6499	26.5248	26.5248
P51114	FXR1	6.01113	3.98966	2	26.3469	26.5723	26.3193	22.4232	22.4232	22.4232
P46109	CRKL	2.62771	3.99079	2	26.6971	27.2488	25.296	22.4232	22.4232	22.4232
Q16181	SEPTIN7	4.07903	4.00479	2	26.1819	26.1819	26.92	22.4232	22.4232	22.4232
Q9NPH2	ISYNA1	4.30461	4.01386	2	26.5153	26.7662	26.0295	22.4232	22.4232	22.4232
O95168	NDUFB4	4.99664	4.01749	2	26.2241	26.3821	26.7158	22.4232	22.4232	22.4232
P49406	MRPL19	3.96009	4.02595	2	26.9602	26.0715	26.3156	22.4232	22.4232	22.4232
P62140	PPP1CB	4.31181	4.03364	2	26.05	26.7882	26.5323	22.4232	22.4232	22.4232
P52434	POLR2H	6.54567	4.03415	2	26.3977	26.5764	26.3977	22.4232	22.4232	22.4232
P06737	PYGL	4.12234	4.04195	2	26.9494	26.223	26.223	22.4232	22.4232	22.4232
Q15050	RRS1	4.45034	4.04912	2	26.7703	26.5556	26.091	22.4232	22.4232	22.4232
P48556	PSMD8	3.61874	4.07208	2	27.1502	26.1677	26.1677	22.4232	22.4232	22.4232
O60749	SNX2	7.33429	4.08886	2	26.5825	26.4506	26.503	22.4232	22.4232	22.4232
Q9Y4Z0	LSM4	4.79436	4.10061	2	26.3575	26.3575	26.8564	22.4232	22.4232	22.4232
Q15427	SF3B4	4.70231	4.11092	2	26.8854	26.3446	26.3723	22.4232	22.4232	22.4232
Q9H3N1	TMX1	3.48716	4.14474	2	27.2883	26.2077	26.2077	22.4232	22.4232	22.4232
P12532	CKMT1A	7.96444	4.18647	2	26.6642	26.5823	26.5823	22.4232	22.4232	22.4232
Q07666	KHDRBS1	3.35947	4.20477	2	27.4161	26.2339	26.2339	22.4232	22.4232	22.4232
P53597	SUCLG1	3.6447	4.2236	2	25.9964	27.108	26.8359	22.4232	22.4232	22.4232
Q15363	TMED2	4.22424	4.26463	2	26.4971	27.166	26.4002	22.4232	22.4232	22.4232
O95336	PGLS	5.61854	4.27309	2	26.6617	26.8976	26.5295	22.4232	22.4232	22.4232
Q96HE7	ERO1A	3.82354	4.27706	2	26.0907	26.983	27.027	22.4232	22.4232	22.4232
P61960	UFM1	3.20686	4.30354	2	25.8517	27.0602	27.2682	22.4232	22.4232	22.4232
O95299	NDUFA10	3.74473	4.30496	2	26.9447	27.1442	26.0954	22.4232	22.4232	22.4232
P08237	PFKM	3.52234	4.3605	2	27.2652	27.0322	26.0536	22.4232	22.4232	22.4232
P82979	SARNP	3.46595	4.36983	2	27.2335	26.0267	27.1187	22.4232	22.4232	22.4232
O95881	TXNDC12	5.59108	4.39557	2	26.7062	27.0437	26.7062	22.4232	22.4232	22.4232
Q99733	NAP1L4	5.4347	4.4165	2	27.0871	26.7159	26.7159	22.4232	22.4232	22.4232
P55010	EIF5	8.28011	4.41798	2	26.7943	26.8554	26.8737	22.4232	22.4232	22.4232
Q9UBX3	SLC25A10	6.19313	4.4183	2	27.0013	26.7615	26.7615	22.4232	22.4232	22.4232
Q8IYB3	SRRM1	3.27598	4.41936	2	26.3531	27.7106	26.4639	22.4232	22.4232	22.4232
P19623	SRM	3.77359	4.44734	2	27.1564	26.2189	27.2362	22.4232	22.4232	22.4232
Q15637	SF1	7.2993	4.47432	2	26.8119	26.9397	26.9409	22.4232	22.4232	22.4232
P41567	EIF1	4.93339	4.50565	2	26.682	27.2512	26.8532	22.4232	22.4232	22.4232
Q06203	PPAT	5.12757	4.53839	2	27.2031	27	26.6815	22.4232	22.4232	22.4232
Q00169	PITPNA	6.39273	4.63174	2	27.066	27.1784	26.9204	22.4232	22.4232	22.4232
Q9NR31	SAR1A	3.53179	4.64869	2	26.6826	27.8589	26.6741	22.4232	22.4232	22.4232
Q9HAV7	GRPEL1	5.2831	4.72966	2	27.2374	27.3501	26.871	22.4232	22.4232	22.4232
O14929	HAT1	4.0875	4.73048	2	26.5771	27.4823	27.4015	22.4232	22.4232	22.4232
O15144	ARPC2	5.29264	4.73058	2	27.0598	27.4362	26.9652	22.4232	22.4232	22.4232
P12236	SLC25A6	5.24117	4.79062	2	32.1897	32.1683	32.126	27.1802	27.2678	27.6642
P55327	TPD52	3.61751	4.83092	2	27.9971	26.6839	27.0812	22.4232	22.4232	22.4232
P83916	CBX1	4.35781	4.83392	2	27.7598	26.9638	27.0477	22.4232	22.4232	22.4232
P50454	SERPINH1	5.16055	4.8733	2	27.1365	27.6163	27.1365	22.4232	22.4232	22.4232
P55795	HNRNPH2	2.40491	4.89981	2	28.962	26.534	26.4729	22.4232	22.4232	22.4232
Q9H7Z7	PTGES2	5.01572	4.90752	2	27.1556	27.1556	27.6809	22.4232	22.4232	22.4232
Q96HS1	PGAM5	6.8862	4.92037	2	27.2838	27.2838	27.4629	22.4232	22.4232	22.4232
Q12904	AIMP1	3.84413	4.93142	2	28.0432	27.0915	26.929	22.4232	22.4232	22.4232
Q71UI9	H2AZ2	6.34433	4.93378	2	33.4209	33.3436	33.3303	28.3544	28.3544	28.5847
Q04837	SSBP1	6.23855	4.94874	2	27.2675	27.3031	27.5451	22.4232	22.4232	22.4232
Q9UK76	JPT1	7.26823	5.00363	2	27.3781	27.3781	27.5242	22.4232	22.4232	22.4232
Q9UK22	FBXO2	6.33324	5.0182	2	27.4254	27.5937	27.305	22.4232	22.4232	22.4232
P26368	U2AF2	5.41788	5.15152	2	27.3916	27.4698	27.8626	22.4232	22.4232	22.4232
P62633	CNBP	3.87265	5.17717	2	27.2415	27.2415	28.3179	22.4232	22.4232	22.4232
P61970	NUTF2	3.68898	5.20471	2	28.1129	26.8307	27.94	22.4232	22.4232	22.4232
Q9NR56	MBNL1	5.26736	5.21989	2	27.8321	27.3227	27.7744	22.4232	22.4232	22.4232
Q9Y333	LSM2	5.63862	5.23629	2	27.6937	27.8663	27.4184	22.4232	22.4232	22.4232
P09234	SNRPC	3.64239	5.2698	2	27.8376	28.3337	26.9076	22.4232	22.4232	22.4232
Q13509	TUBB3	4.73554	5.29142	2	27.8599	28.0053	27.2785	22.4232	22.4232	22.4232
Q15843	NEDD8	3.77591	5.34078	2	27.0238	28.3563	27.9118	22.4232	22.4232	22.4232
Q9Y3B4	SF3B6	3.76545	5.35176	2	28.0224	28.3008	27.0016	22.4232	22.4232	22.4232
O00264	PGRMC1	7.53216	5.3718	2	27.7238	27.7831	27.8781	22.4232	22.4232	22.4232
P99999	CYCS	6.54152	5.42864	2	27.8347	27.722	27.9987	22.4232	22.4232	22.4232
P13804	ETFA	5.44348	5.46979	2	27.6506	27.8539	28.1744	22.4232	22.4232	22.4232
P42126	ECI1	3.31578	5.69067	2	28.8257	27.0377	28.4782	22.4232	22.4232	22.4232
P49721	PSMB2	3.51311	5.69425	2	27.1445	28.6556	28.5522	22.4232	22.4232	22.4232
P62857	RPS28	3.89114	5.70087	2	28.8868	27.8907	27.5946	22.4232	22.4232	22.4232
P58546	MTPN	8.13855	5.72561	2	28.1106	28.1196	28.2161	22.4232	22.4232	22.4232
P30046	DDT	4.3616	5.75367	2	27.6195	28.2635	28.6475	22.4232	22.4232	22.4232
P56385	ATP5ME	5.56603	5.81664	2	28.4377	27.9432	28.3385	22.4232	22.4232	22.4232
P09012	SNRPA	3.36822	5.87836	2	28.9596	28.7317	27.2133	22.4232	22.4232	22.4232
Q15847	ADIRF	6.34962	5.8847	2	28.5015	28.1948	28.2273	22.4232	22.4232	22.4232
P62314	SNRPD1	3.97431	6.06949	2	28.9901	27.7094	28.7785	22.4232	22.4232	22.4232
P51858	HDGF	5.63291	6.07857	2	28.6532	28.198	28.654	22.4232	22.4232	22.4232
Q3ZCM7	TUBB8	3.17899	6.10173	2	29.7981	27.8883	27.8883	22.4232	22.4232	22.4232
P61513	RPL37A	5.96239	6.11962	2	28.795	28.4328	28.4005	22.4232	22.4232	22.4232
P30049	ATP5F1D	4.27849	6.12377	2	28.8339	28.9278	27.8792	22.4232	22.4232	22.4232
P22392	NME2	6.51409	6.23952	2	28.5523	28.5865	28.8493	22.4232	22.4232	22.4232
P60903	S100A10	3.71628	6.31738	2	28.92	27.8344	29.4672	22.4232	22.4232	22.4232
P84103	SRSF3	6.15323	6.35196	2	28.6876	29.0079	28.6299	22.4232	22.4232	22.4232
P60866	RPS20	2.34114	6.49864	2	29.8002	30.0392	30.2944	22.4232	22.4232	25.7915
P62942	FKBP1A	9.71482	6.66835	2	29.1206	29.0881	29.0659	22.4232	22.4232	22.4232
P62304	SNRPE	6.13017	6.96966	2	29.1764	29.6281	29.374	22.4232	22.4232	22.4232
O75531	BANF1	6.71279	7.04537	2	29.334	29.6507	29.4209	22.4232	22.4232	22.4232
P61088	UBE2N	9.59166	7.13568	2	29.5693	29.5234	29.5839	22.4232	22.4232	22.4232
P17096	HMGA1	7.88919	7.13822	2	29.6279	29.5895	29.4667	22.4232	22.4232	22.4232
P61254	RPL26	4.79096	7.34305	2	30.1393	29.983	29.1763	22.4232	22.4232	22.4232
P05386	RPLP1	3.14921	7.40498	2	30.4219	30.7927	28.2699	22.4232	22.4232	22.4232
Q13838	DDX39B	4.62935	8.65251	2	31.3675	31.5978	31.3997	22.4232	23.5612	22.4232
Q99880	H2BC13	6.13841	9.92722	2	34.13	33.9763	33.9677	23.9198	23.9198	24.4528
O60762	DPM1	6.66345	1.00865	3	23.4179	23.4596	23.4179	22.4232	22.4232	22.4232
O95453	PARN	2.99299	1.74868	3	24.5798	23.9679	23.9679	22.4232	22.4232	22.4232
Q8TEQ6	GEMIN5	4.05785	1.80554	3	24.4533	24.1164	24.1164	22.4232	22.4232	22.4232
Q9Y5X3	SNX5	3.34625	1.84764	3	24.0963	24.0963	24.6199	22.4232	22.4232	22.4232
Q9UHY7	ENOPH1	5.0582	2.24459	3	24.8241	24.5896	24.5896	22.4232	22.4232	22.4232
Q9NZ01	TECR	2.75701	2.2864	3	24.3351	24.474	25.3196	22.4232	22.4232	22.4232
O00541	PES1	4.92542	2.4163	3	24.7486	24.7486	25.0211	22.4232	22.4232	22.4232
Q7L0Y3	TRMT10C	4.54712	2.49487	3	24.8819	24.7363	25.1359	22.4232	22.4232	22.4232
O43818	RRP9	5.31302	2.51437	3	24.862	25.0887	24.862	22.4232	22.4232	22.4232
Q9UJS0	SLC25A13	2.00046	2.62582	3	24.4788	24.4788	26.1893	22.4232	22.4232	22.4232
Q92890	UFD1	2.9666	2.74793	3	24.961	25.81	24.7423	22.4232	22.4232	22.4232
P51610	HCFC1	2.5842	2.79244	3	26.0511	24.7978	24.7978	22.4232	22.4232	22.4232
P15170	GSPT1	5.41144	2.82817	3	25.4119	25.171	25.171	22.4232	22.4232	22.4232
O00151	PDLIM1	6.78795	2.88307	3	25.2692	25.2692	25.3803	22.4232	22.4232	22.4232
Q6PKG0	LARP1	3.55873	2.89891	3	25.0805	25.0805	25.8051	22.4232	22.4232	22.4232
Q9Y6Y8	SEC23IP	2.1273	2.90872	3	24.7508	26.494	24.7508	22.4232	22.4232	22.4232
Q9Y2R9	MRPS7	3.17306	2.9172	3	25.2914	24.8375	25.8922	22.4232	22.4232	22.4232
P21283	ATP6V1C1	2.61351	2.95726	3	24.54	25.9919	25.6094	22.4232	22.4232	22.4232
Q96E11	MRRF	2.50872	2.96555	3	26.3183	24.9433	24.9045	22.4232	22.4232	22.4232
Q96G03	PGM2	4.14202	3.02197	3	25.2662	25.2662	25.8031	22.4232	22.4232	22.4232
P07305	H1-0	4.98794	3.07722	3	25.3888	25.7235	25.3888	22.4232	22.4232	22.4232
Q99459	CDC5L	2.6024	3.09052	3	24.7074	26.2904	25.5433	22.4232	22.4232	22.4232
P05161	ISG15	3.24043	3.12175	3	25.1462	26.1645	25.324	22.4232	22.4232	22.4232
P18583	SON	2.99658	3.12792	3	25.3279	25.0625	26.2628	22.4232	22.4232	22.4232
O95793	STAU1	2.83178	3.1314	3	26.3597	25.152	25.152	22.4232	22.4232	22.4232
Q7L576	CYFIP1	5.3262	3.14006	3	25.7505	25.4696	25.4696	22.4232	22.4232	22.4232
Q13601	KRR1	3.8666	3.14635	3	25.9753	25.2246	25.5087	22.4232	22.4232	22.4232
P82650	MRPS22	4.91509	3.18219	3	25.3737	25.6645	25.7778	22.4232	22.4232	22.4232
P26358	DNMT1	2.93029	3.19516	3	25.0508	25.4462	26.3579	22.4232	22.4232	22.4232
O75400	PRPF40A	4.42614	3.2374	3	25.4912	25.9855	25.505	22.4232	22.4232	22.4232
P49792	RANBP2	2.81239	3.2398	3	24.9823	25.5727	26.4339	22.4232	22.4232	22.4232
Q96P70	IPO9	2.07064	3.24086	3	26.349	24.3205	26.3226	22.4232	22.4232	22.4232
P19388	POLR2E	2.32446	3.24228	3	24.8887	26.7781	25.3295	22.4232	22.4232	22.4232
Q96A33	CCDC47	6.07652	3.266	3	25.5688	25.7827	25.716	22.4232	22.4232	22.4232
P40937	RFC5	2.51198	3.31157	3	26.7693	25.1655	25.2694	22.4232	22.4232	22.4232
P28070	PSMB4	2.13583	3.39684	3	25.7942	24.6643	27.0015	22.4232	22.4232	22.4232
P84095	RHOG	2.63049	3.39784	3	24.8389	26.2183	26.4059	22.4232	22.4232	22.4232
P61026	RAB10	8.61319	3.40671	3	25.8605	25.8146	25.8146	22.4232	22.4232	22.4232
P46926	GNPDA1	3.21235	3.43843	3	25.5099	26.565	25.5099	22.4232	22.4232	22.4232
Q8TAQ2	SMARCC2	7.01274	3.46882	3	25.964	25.8825	25.8295	22.4232	22.4232	22.4232
O76003	GLRX3	3.45152	3.48844	3	26.0098	26.392	25.333	22.4232	22.4232	22.4232
Q9UGI8	TES	3.01916	3.4888	3	25.5114	25.5114	26.7131	22.4232	22.4232	22.4232
Q9H444	CHMP4B	2.51344	3.49356	3	25.0625	25.7544	26.9333	22.4232	22.4232	22.4232
P28290	ITPRID2	2.43798	3.50038	3	25.6289	25.1107	27.031	22.4232	22.4232	22.4232
P21912	SDHB	4.59483	3.50371	3	25.7674	25.7674	26.2459	22.4232	22.4232	22.4232
P11216	PYGB	5.34336	3.51244	3	25.7283	26.0456	26.033	22.4232	22.4232	22.4232
P00568	AK1	3.61606	3.52164	3	26.5122	25.6611	25.6611	22.4232	22.4232	22.4232
Q9H936	SLC25A22	2.93134	3.55582	3	25.1272	26.5124	26.2974	22.4232	22.4232	22.4232
P30043	BLVRB	5.05738	3.56813	3	25.8677	25.8663	26.2399	22.4232	22.4232	22.4232
Q9H8H0	NOL11	6.24549	3.58073	3	25.9411	25.9411	26.1296	22.4232	22.4232	22.4232
P00918	CA2	4.64303	3.61192	3	25.8752	25.8752	26.3549	22.4232	22.4232	22.4232
Q6ZMU5	TRIM72	3.58079	3.61496	3	25.6085	25.897	26.6089	22.4232	22.4232	22.4232
O76031	CLPX	5.9431	3.62745	3	26.2022	25.9748	25.9748	22.4232	22.4232	22.4232
O75489	NDUFS3	5.32937	3.66176	3	25.9759	25.9759	26.3029	22.4232	22.4232	22.4232
P35249	RFC4	2.96474	3.66977	3	26.4099	26.6367	25.2321	22.4232	22.4232	22.4232
Q9Y2Z0	SUGT1	4.05788	3.67086	3	26.5507	25.8657	25.8657	22.4232	22.4232	22.4232
Q9H0U4	RAB1B	3.88249	3.6994	3	30.574	30.8608	30.1827	26.5175	26.9671	27.0347
Q16822	PCK2	2.71381	3.72452	3	27.114	25.9711	25.358	22.4232	22.4232	22.4232
P60983	GMFB	3.86755	3.73046	3	26.6722	25.8943	25.8943	22.4232	22.4232	22.4232
Q9NYL9	TMOD3	2.90438	3.75102	3	25.5549	25.8911	27.0765	22.4232	22.4232	22.4232
Q96FQ6	S100A16	5.43496	3.7834	3	26.3702	26.2414	26.0081	22.4232	22.4232	22.4232
Q8WXF1	PSPC1	3.24655	3.82188	3	26.0768	26.9764	25.6819	22.4232	22.4232	22.4232
P61011	SRP54	2.40883	3.84105	3	25.4391	27.5265	25.8271	22.4232	22.4232	22.4232
P62995	TRA2B	3.55563	3.84624	3	26.8925	25.8236	26.0921	22.4232	22.4232	22.4232
P16144	ITGB4	4.26829	3.84822	3	26.6902	26.0075	26.1165	22.4232	22.4232	22.4232
Q92520	FAM3C	4.56931	3.85907	3	25.9303	26.4085	26.5079	22.4232	22.4232	22.4232
P29218	IMPA1	2.9011	3.86713	3	27.0704	26.375	25.4255	22.4232	22.4232	22.4232
P35244	RPA3	3.04539	3.88794	3	26.023	27.1742	25.7362	22.4232	22.4232	22.4232
O15427	SLC16A3	4.65041	3.92249	3	26.2726	26.6749	26.0895	22.4232	22.4232	22.4232
Q9NPJ3	ACOT13	8.03858	3.95713	3	26.3556	26.4298	26.3556	22.4232	22.4232	22.4232
Q13630	GFUS	5.46879	3.95797	3	26.5408	26.1735	26.4291	22.4232	22.4232	22.4232
Q8TCT9	HM13	2.28763	3.97233	3	24.9688	27.2096	27.0081	22.4232	22.4232	22.4232
P35606	COPB2	2.64475	4.00583	3	25.2749	26.973	27.039	22.4232	22.4232	22.4232
P06730	EIF4E	3.19212	4.01054	3	25.9216	27.2558	26.1236	22.4232	22.4232	22.4232
P55145	MANF	5.6412	4.02024	3	26.6433	26.3434	26.3434	22.4232	22.4232	22.4232
P68402	PAFAH1B2	8.85228	4.04299	3	26.4978	26.4503	26.4503	22.4232	22.4232	22.4232
Q9BRA2	TXNDC17	2.81694	4.0475	3	27.5208	25.9456	25.9456	22.4232	22.4232	22.4232
Q9UMR2	DDX19B	3.1077	4.04782	3	26.7067	25.6176	27.0886	22.4232	22.4232	22.4232
Q13011	ECH1	2.53037	4.08091	3	27.7349	26.1319	25.6454	22.4232	22.4232	22.4232
Q9Y6M1	IGF2BP2	3.77249	4.12574	3	26.2457	26.2457	27.1553	22.4232	22.4232	22.4232
P38117	ETFB	3.57926	4.12929	3	27.0782	25.9163	26.6629	22.4232	22.4232	22.4232
P35080	PFN2	5.069	4.13567	3	26.3976	26.8442	26.4347	22.4232	22.4232	22.4232
Q9P035	HACD3	2.99027	4.16747	3	25.6193	27.0175	27.1351	22.4232	22.4232	22.4232
Q99584	S100A13	3.16354	4.17419	3	26.9957	27.0768	25.7195	22.4232	22.4232	22.4232
P56134	ATP5MF	4.20492	4.17761	3	27.0773	26.3803	26.3446	22.4232	22.4232	22.4232
Q8IWX8	CHERP	3.72942	4.18002	3	26.8406	25.979	26.9899	22.4232	22.4232	22.4232
Q15691	MAPRE1	7.31646	4.20929	3	26.7049	26.6251	26.5674	22.4232	22.4232	22.4232
P33176	KIF5B	2.9745	4.22657	3	27.1042	27.1909	25.6541	22.4232	22.4232	22.4232
O43765	SGTA	2.23098	4.25495	3	27.3982	27.8038	27.1471	22.4232	22.4232	24.7378
Q15020	SART3	3.93031	4.27047	3	27.0002	26.9588	26.1218	22.4232	22.4232	22.4232
P61081	UBE2M	3.47957	4.27616	3	26.1165	26.5866	27.3949	22.4232	22.4232	22.4232
Q9H0D6	XRN2	2.39963	4.279	3	27.8158	26.9311	25.3596	22.4232	22.4232	22.4232
Q9BZE4	GTPBP4	2.88118	4.31868	3	27.5759	26.9159	25.7338	22.4232	22.4232	22.4232
O15145	ARPC3	2.49012	4.31965	3	26.9786	25.456	27.7939	22.4232	22.4232	22.4232
P06493	CDK1	3.26404	4.33468	3	26.9215	25.945	27.4071	22.4232	22.4232	22.4232
P61006	RAB8A	5.07615	4.35146	3	26.5084	27.0273	26.7882	22.4232	22.4232	22.4232
Q12849	GRSF1	3.44442	4.37198	3	27.5745	26.4055	26.4055	22.4232	22.4232	22.4232
P31689	DNAJA1	2.5187	4.38815	3	26.1276	26.1276	28.1787	22.4232	22.4232	22.4232
P17858	PFKL	4.60603	4.41651	3	27.2344	26.6955	26.5891	22.4232	22.4232	22.4232
P67870	CSNK2B	2.64983	4.47442	3	27.0466	27.9291	25.7171	22.4232	22.4232	22.4232
Q16630	CPSF6	3.71337	4.49682	3	26.6483	27.5997	26.512	22.4232	22.4232	22.4232
Q9NZL9	MAT2B	3.97681	4.54341	3	26.5899	26.7587	27.5511	22.4232	22.4232	22.4232
Q9Y2L1	DIS3	4.91484	4.58251	3	27.0833	27.2594	26.6743	22.4232	22.4232	22.4232
P56537	EIF6	5.08783	4.5849	3	26.8512	26.8512	27.3219	22.4232	22.4232	22.4232
O14561	NDUFAB1	2.27736	4.71977	3	27.3301	28.5231	25.5756	22.4232	22.4232	22.4232
Q14498	RBM39	6.42666	4.72087	3	26.9947	27.2189	27.2185	22.4232	22.4232	22.4232
Q9NTK5	OLA1	4.38173	4.72623	3	26.7862	27.0501	27.6119	22.4232	22.4232	22.4232
P61158	ACTR3	2.86397	4.73322	3	26.5596	26.5596	28.3499	22.4232	22.4232	22.4232
Q01650	SLC7A5	3.36803	4.74622	3	27.3699	26.3225	27.8157	22.4232	22.4232	22.4232
P11908	PRPS2	6.69656	4.78801	3	27.3408	27.1464	27.1464	22.4232	22.4232	22.4232
P51665	PSMD7	5.62535	4.80862	3	27.1682	27.062	27.4652	22.4232	22.4232	22.4232
O15347	HMGB3	3.4802	4.85277	3	27.7219	27.6765	26.4294	22.4232	22.4232	22.4232
Q05639	EEF1A2	4.27668	4.86158	3	30.1506	30.6678	30.6157	25.8226	25.1977	25.8291
P06703	S100A6	3.09629	4.88374	3	31.295	30.9097	31.708	26.3412	25.626	27.2942
Q13442	PDAP1	4.38689	4.88845	3	26.8248	27.6617	27.4483	22.4232	22.4232	22.4232
Q9UHD1	CHORDC1	5.50098	4.8994	3	27.0584	27.455	27.4544	22.4232	22.4232	22.4232
P27694	RPA1	6.90585	4.93578	3	27.4774	27.2997	27.2997	22.4232	22.4232	22.4232
P22061	PCMT1	2.91158	4.95998	3	28.0365	27.9438	26.1691	22.4232	22.4232	22.4232
P68366	TUBA4A	5.83245	5.02089	3	27.6481	27.2628	27.4213	22.4232	22.4232	22.4232
P54709	ATP1B3	3.29701	5.04989	3	28.1723	26.5259	27.721	22.4232	22.4232	22.4232
P00491	PNP	8.66826	5.097	3	27.5557	27.4795	27.5253	22.4232	22.4232	22.4232
P52292	KPNA2	5.30925	5.09995	3	27.5157	27.7928	27.2609	22.4232	22.4232	22.4232
Q92734	TFG	5.39977	5.17193	3	27.4473	27.4473	27.8908	22.4232	22.4232	22.4232
Q14019	COTL1	3.24931	5.17369	3	28.2084	26.5676	28.0145	22.4232	22.4232	22.4232
O43252	PAPSS1	8.5881	5.21134	3	27.6108	27.682	27.6108	22.4232	22.4232	22.4232
Q8NCW5	NAXE	4.85406	5.28038	3	27.6704	28.0773	27.3629	22.4232	22.4232	22.4232
Q15287	RNPS1	4.96288	5.29578	3	27.3405	27.828	27.9884	22.4232	22.4232	22.4232
P49458	SRP9	3.58433	5.32346	3	28.6042	27.463	27.1727	22.4232	22.4232	22.4232
O95433	AHSA1	4.77522	5.32479	3	27.391	27.7085	28.1443	22.4232	22.4232	22.4232
Q15758	SLC1A5	4.70364	5.34498	3	27.3117	27.9777	28.015	22.4232	22.4232	22.4232
P48444	ARCN1	4.56388	5.36188	3	27.7739	28.2209	27.3603	22.4232	22.4232	22.4232
Q92522	H1-10	5.22011	5.39264	3	27.9928	27.9807	27.4739	22.4232	22.4232	22.4232
O43670	ZNF207	6.26196	5.41159	3	27.986	27.856	27.6622	22.4232	22.4232	22.4232
O95573	ACSL3	7.6795	5.50501	3	28.0107	27.9032	27.8707	22.4232	22.4232	22.4232
O75821	EIF3G	5.89297	5.50844	3	27.8737	28.1595	27.7616	22.4232	22.4232	22.4232
P61289	PSME3	3.98235	5.61616	3	27.5109	28.7398	27.8673	22.4232	22.4232	22.4232
P28072	PSMB6	5.98211	5.64798	3	28.3019	27.9558	27.9558	22.4232	22.4232	22.4232
P35637	FUS	7.65938	5.69566	3	28.0334	28.1817	28.1414	22.4232	22.4232	22.4232
Q9H9B4	SFXN1	5.60854	5.71403	3	28.2217	28.3348	27.8551	22.4232	22.4232	22.4232
O15479	MAGEB2	5.58131	5.73587	3	27.9355	28.4379	28.1037	22.4232	22.4232	22.4232
Q14444	CAPRIN1	6.15631	5.75101	3	28.0083	28.142	28.3722	22.4232	22.4232	22.4232
P43307	SSR1	6.18949	5.76731	3	28.1187	28.3964	28.0563	22.4232	22.4232	22.4232
P63220	RPS21	3.91327	5.86834	3	29.083	27.838	27.9535	22.4232	22.4232	22.4232
P36957	DLST	5.70468	5.89043	3	28.4978	28.4068	28.0361	22.4232	22.4232	22.4232
Q9Y5S9	RBM8A	5.99212	5.90818	3	28.2211	28.5711	28.2019	22.4232	22.4232	22.4232
P49207	RPL34	3.0169	5.96016	3	29.0148	29.1059	29.0832	22.4232	22.4232	24.4772
P23588	EIF4B	5.29539	6.05307	3	28.1884	28.8181	28.4223	22.4232	22.4232	22.4232
Q15185	PTGES3	6.58166	6.06684	3	28.4023	28.6655	28.4023	22.4232	22.4232	22.4232
P62136	PPP1CA	4.51946	6.14682	3	28.6233	29.0476	28.0391	22.4232	22.4232	22.4232
P61224	RAP1B	6.60872	6.14832	3	28.5812	28.4153	28.718	22.4232	22.4232	22.4232
P10606	COX5B	3.13469	6.21614	3	27.3724	28.917	29.6286	22.4232	22.4232	22.4232
P53999	SUB1	4.00282	6.22204	3	29.1762	27.8624	28.8971	22.4232	22.4232	22.4232
P04899	GNAI2	5.79069	6.27017	3	28.492	28.6179	28.97	22.4232	22.4232	22.4232
Q04760	GLO1	4.16531	6.30948	3	28.9888	28.0059	29.2033	22.4232	22.4232	22.4232
P35268	RPL22	5.21839	6.45117	3	29.2757	28.6033	28.744	22.4232	22.4232	22.4232
P61353	RPL27	3.20368	6.4661	3	28.7688	30.0962	27.8028	22.4232	22.4232	22.4232
P20290	BTF3	5.31053	6.49789	3	29.3111	28.7509	28.7012	22.4232	22.4232	22.4232
Q01130	SRSF2	4.79992	6.73668	3	29.4114	28.6157	29.4524	22.4232	22.4232	22.4232
Q16629	SRSF7	3.05569	6.75046	3	29.7408	27.6721	30.108	22.4232	22.4232	22.4232
P84098	RPL19	4.90408	6.94582	3	29.5331	28.8516	29.7222	22.4232	22.4232	22.4232
P09429	HMGB1	5.39056	6.94605	3	29.3193	29.0512	29.7372	22.4232	22.4232	22.4232
Q15056	EIF4H	8.67706	7.0709	3	29.5143	29.4339	29.5339	22.4232	22.4232	22.4232
P62244	RPS15A	3.20321	7.16018	3	28.127	30.1221	30.5009	22.4232	22.4232	22.4232
P62263	RPS14	5.523	7.2004	3	29.7801	29.8483	29.2422	22.4232	22.4232	22.4232
Q9Y3U8	RPL36	3.99208	7.53556	3	28.9921	30.3382	30.5459	22.4232	22.4232	22.4232
P26447	S100A4	4.40241	7.56474	3	29.2178	30.3744	30.3715	22.4232	22.4232	22.4232
P84077	ARF1	6.54769	7.90842	3	30.235	30.196	30.5637	22.4232	22.4232	22.4232
P42766	RPL35	6.44428	8.00928	3	30.2422	30.3862	30.669	22.4232	22.4232	22.4232
P62854	RPS26	8.84655	8.36859	3	30.7307	30.8013	30.8433	22.4232	22.4232	22.4232
Q9UHX1	PUF60	2.25456	1.23569	4	26.8984	27.5796	26.8984	25.8776	25.9141	25.8776
Q9ULC5	ACSL5	4.73944	2.19702	4	24.5282	24.5282	24.8041	22.4232	22.4232	22.4232
P19367	HK1	4.06682	2.38289	4	25.1009	24.6586	24.6586	22.4232	22.4232	22.4232
Q9NY33	DPP3	2.43646	2.50358	4	24.1228	25.1834	25.474	22.4232	22.4232	22.4232
O75694	NUP155	5.97337	2.62136	4	24.9907	25.1522	24.9907	22.4232	22.4232	22.4232
O15355	PPM1G	3.36772	2.65847	4	25.5775	24.8337	24.8337	22.4232	22.4232	22.4232
Q9UN86	G3BP2	3.65498	3.05902	4	25.2952	25.9601	25.1912	22.4232	22.4232	22.4232
P57088	TMEM33	6.98453	3.09283	4	25.4805	25.5869	25.4805	22.4232	22.4232	22.4232
P33240	CSTF2	2.18173	3.1305	4	24.95	24.95	26.761	22.4232	22.4232	22.4232
Q8NI36	WDR36	4.05012	3.31065	4	25.4743	25.5846	26.1426	22.4232	22.4232	22.4232
Q13155	AIMP2	3.23298	3.31254	4	25.0999	25.8724	26.2348	22.4232	22.4232	22.4232
P78344	EIF4G2	3.29492	3.32959	4	25.9692	25.1151	26.1739	22.4232	22.4232	22.4232
P04040	CAT	2.82994	3.37039	4	25.703	25.0916	26.5861	22.4232	22.4232	22.4232
Q9UBB4	ATXN10	3.31028	3.40788	4	26.1847	25.174	26.1344	22.4232	22.4232	22.4232
Q8WTT2	NOC3L	3.04496	3.41543	4	26.2103	25.0666	26.2389	22.4232	22.4232	22.4232
Q13310	PABPC4	2.81751	3.44025	4	25.0847	26.6301	25.8755	22.4232	22.4232	22.4232
Q9NVA2	SEPTIN11	2.34474	3.44784	4	26.2363	24.7001	26.6767	22.4232	22.4232	22.4232
Q8NBF2	NHLRC2	2.59271	3.54136	4	25.4375	25.4375	27.0186	22.4232	22.4232	22.4232
P05141	SLC25A5	3.28051	3.59038	4	30.6551	29.911	29.9571	27.0874	26.2365	26.4282
O00116	AGPS	11.7806	3.59041	4	26.011	26.0188	26.011	22.4232	22.4232	22.4232
P28482	MAPK1	3.71284	3.59203	4	26.0587	26.4654	25.5215	22.4232	22.4232	22.4232
P27144	AK4	3.11539	3.60691	4	26.5116	25.2559	26.3227	22.4232	22.4232	22.4232
Q92973	TNPO1	2.86933	3.6235	4	25.7101	25.482	26.9478	22.4232	22.4232	22.4232
Q9Y295	DRG1	6.00722	3.62768	4	26.0159	26.1912	25.9455	22.4232	22.4232	22.4232
Q6NZI2	CAVIN1	4.03449	3.63843	4	26.5203	25.8219	25.8426	22.4232	22.4232	22.4232
Q9UHB9	SRP68	3.20342	3.64548	4	25.9909	26.7533	25.4617	22.4232	22.4232	22.4232
P25685	DNAJB1	3.46307	3.66132	4	26.7054	25.6213	25.9268	22.4232	22.4232	22.4232
P26006	ITGA3	4.11088	3.73476	4	26.6084	25.9327	25.9327	22.4232	22.4232	22.4232
P55209	NAP1L1	2.84695	3.7704	4	30.8245	30.6808	30.8356	26.0659	27.6092	27.3546
P35222	CTNNB1	2.80287	3.78467	4	27.1973	25.6766	25.7496	22.4232	22.4232	22.4232
O94826	TOMM70	4.03776	3.82322	4	26.09	25.9305	26.7187	22.4232	22.4232	22.4232
P62491	RAB11A	2.31419	3.9111	4	27.6692	25.989	25.3446	22.4232	22.4232	22.4232
Q16851	UGP2	4.93777	3.95401	4	26.6724	26.2296	26.2296	22.4232	22.4232	22.4232
Q96QK1	VPS35	5.11458	3.96233	4	26.143	26.4097	26.6037	22.4232	22.4232	22.4232
P32322	PYCR1	4.88817	3.96358	4	26.6913	26.2345	26.2345	22.4232	22.4232	22.4232
P42166	TMPO	2.66943	3.98972	4	27.5456	25.8465	25.8465	22.4232	22.4232	22.4232
P05556	ITGB1	3.11419	3.99752	4	27.2362	25.7578	26.2681	22.4232	22.4232	22.4232
O95202	LETM1	5.42017	4.00965	4	26.3195	26.6593	26.3195	22.4232	22.4232	22.4232
P24752	ACAT1	3.12683	4.04527	4	27.0136	26.7839	25.6077	22.4232	22.4232	22.4232
A0MZ66	SHTN1	3.04107	4.06146	4	27.25	26.5447	25.6592	22.4232	22.4232	22.4232
Q9BXJ9	NAA15	2.43598	4.06796	4	27.6765	25.367	26.4298	22.4232	22.4232	22.4232
Q9Y5K5	UCHL5	4.73595	4.08997	4	26.6033	26.7548	26.1813	22.4232	22.4232	22.4232
Q14157	UBAP2L	4.11559	4.12482	4	26.9564	26.0998	26.5878	22.4232	22.4232	22.4232
Q08752	PPID	4.18667	4.17256	4	26.6464	26.1557	26.9851	22.4232	22.4232	22.4232
P11766	ADH5	5.81563	4.18939	4	26.5122	26.8008	26.5247	22.4232	22.4232	22.4232
Q01970	PLCB3	2.67719	4.19854	4	25.9765	27.8065	26.0821	22.4232	22.4232	22.4232
Q9BSJ8	ESYT1	3.32494	4.25947	4	27.4043	25.994	26.6497	22.4232	22.4232	22.4232
P46776	RPL27A	4.08587	4.28423	4	29.7039	28.9864	29.7199	25.388	25.0848	25.0848
Q9Y383	LUC7L2	5.26408	4.3235	4	26.631	27.0132	26.5958	22.4232	22.4232	22.4232
Q9NX63	CHCHD3	2.24271	4.34276	4	26.8728	25.3208	28.1042	22.4232	22.4232	22.4232
P55265	ADAR	3.20654	4.35571	4	27.3865	25.907	27.0431	22.4232	22.4232	22.4232
Q9P258	RCC2	4.23362	4.36811	4	27.1562	26.3249	26.8927	22.4232	22.4232	22.4232
P09455	RBP1	3.31945	4.37114	4	27.1126	25.9628	27.3075	22.4232	22.4232	22.4232
P14735	IDE	3.45253	4.37818	4	26.9955	26.053	27.3556	22.4232	22.4232	22.4232
P18085	ARF4	4.85404	4.41353	4	26.4972	27.0634	26.9495	22.4232	22.4232	22.4232
O75475	PSIP1	4.06815	4.41369	4	26.6791	27.3682	26.4633	22.4232	22.4232	22.4232
P11177	PDHB	3.62868	4.42656	4	26.3621	26.6491	27.5379	22.4232	22.4232	22.4232
O43684	BUB3	3.65691	4.47559	4	26.4378	26.6684	27.59	22.4232	22.4232	22.4232
P50213	IDH3A	2.35854	4.48316	4	27.2788	25.422	28.0182	22.4232	22.4232	22.4232
O75477	ERLIN1	2.69974	4.49551	4	27.8322	25.7194	27.2043	22.4232	22.4232	22.4232
Q7Z4W1	DCXR	3.81202	4.51635	4	26.296	27.1915	27.3311	22.4232	22.4232	22.4232
Q15019	SEPTIN2	2.58334	4.52684	4	27.4419	27.7977	25.6104	22.4232	22.4232	22.4232
O43615	TIMM44	5.26261	4.57962	4	27.012	26.7529	27.2434	22.4232	22.4232	22.4232
Q9NVP1	DDX18	5.25469	4.59224	4	27.3009	26.8727	26.8727	22.4232	22.4232	22.4232
Q06210	GFPT1	3.64457	4.59441	4	26.9466	26.4257	27.6804	22.4232	22.4232	22.4232
P67936	TPM4	4.29847	4.59831	4	27.0259	26.5886	27.4499	22.4232	22.4232	22.4232
P61019	RAB2A	2.42728	4.63615	4	28.0861	25.5641	27.5277	22.4232	22.4232	22.4232
Q15008	PSMD6	4.61815	4.64867	4	27.4894	26.8582	26.868	22.4232	22.4232	22.4232
Q9UBT2	UBA2	4.38637	4.65738	4	27.5568	26.8021	26.8827	22.4232	22.4232	22.4232
Q14683	SMC1A	2.1481	4.67637	4	27.7749	28.2471	25.2765	22.4232	22.4232	22.4232
P09525	ANXA4	4.18462	4.68008	4	27.3269	26.5651	27.4178	22.4232	22.4232	22.4232
Q9UEW8	STK39	2.95539	4.69138	4	27.9191	27.3863	26.0383	22.4232	22.4232	22.4232
P08559	PDHA1	3.24365	4.69645	4	26.188	27.7117	27.4591	22.4232	22.4232	22.4232
P20073	ANXA7	2.68383	4.69662	4	27.7799	27.3427	28.1053	24.2917	22.4232	22.4232
P61160	ACTR2	3.13568	4.72999	4	26.359	28.0947	27.0058	22.4232	22.4232	22.4232
Q9H2U2	PPA2	5.73048	4.75109	4	27.301	27.2712	26.9505	22.4232	22.4232	22.4232
O75083	WDR1	2.67162	4.75868	4	25.881	27.522	28.1425	22.4232	22.4232	22.4232
Q9Y6E2	BZW2	4.52075	4.77474	4	26.8617	27.102	27.63	22.4232	22.4232	22.4232
O43324	EEF1E1	7.53146	4.78794	4	27.2731	27.2241	27.1361	22.4232	22.4232	22.4232
O00487	PSMD14	3.0512	4.78874	4	26.9664	28.2443	26.425	22.4232	22.4232	22.4232
P09661	SNRPA1	3.55543	4.78914	4	28.0077	26.7437	26.8855	22.4232	22.4232	22.4232
P60953	CDC42	6.03998	4.83183	4	27.1595	27.4459	27.1595	22.4232	22.4232	22.4232
O14737	PDCD5	4.82773	4.8364	4	27.2099	26.9539	27.6148	22.4232	22.4232	22.4232
Q9HC38	GLOD4	5.42015	4.87318	4	27.1355	27.5703	27.1832	22.4232	22.4232	22.4232
Q92552	MRPS27	4.82234	4.87618	4	27.0993	27.1103	27.6885	22.4232	22.4232	22.4232
O43809	NUDT21	4.05067	4.89321	4	27.9271	26.9882	27.0339	22.4232	22.4232	22.4232
P62495	ETF1	4.96593	4.89791	4	27.5336	26.9635	27.4661	22.4232	22.4232	22.4232
P51571	SSR4	2.85595	4.90807	4	28.3865	26.2337	27.3735	22.4232	22.4232	22.4232
P38606	ATP6V1A	5.00674	4.91308	4	26.9838	27.5144	27.5105	22.4232	22.4232	22.4232
P00492	HPRT1	2.9573	4.91787	4	27.9915	27.8602	26.1714	22.4232	22.4232	22.4232
Q99848	EBNA1BP2	5.9362	4.93394	4	27.2187	27.293	27.5596	22.4232	22.4232	22.4232
Q9BXP5	SRRT	4.68707	4.94761	4	27.1551	27.1594	27.7978	22.4232	22.4232	22.4232
P10644	PRKAR1A	6.53775	4.95562	4	27.2662	27.5169	27.3533	22.4232	22.4232	22.4232
P11310	ACADM	5.18627	5.00065	4	27.1224	27.4731	27.6759	22.4232	22.4232	22.4232
P61086	UBE2K	4.49336	5.00846	4	26.9499	27.7102	27.6348	22.4232	22.4232	22.4232
Q9BZZ5	API5	4.5671	5.01185	4	27.5977	26.9776	27.7297	22.4232	22.4232	22.4232
P13995	MTHFD2	2.90003	5.02749	4	26.2106	28.0464	28.095	22.4232	22.4232	22.4232
P11279	LAMP1	6.04212	5.03953	4	27.4183	27.6528	27.317	22.4232	22.4232	22.4232
Q96I24	FUBP3	5.93913	5.0924	4	27.4089	27.7288	27.4089	22.4232	22.4232	22.4232
P49419	ALDH7A1	4.22262	5.14404	4	27.0382	27.6229	28.0405	22.4232	22.4232	22.4232
Q6IBS0	TWF2	5.73553	5.1544	4	27.7998	27.5511	27.3818	22.4232	22.4232	22.4232
P55084	HADHB	5.92994	5.21474	4	27.5349	27.8573	27.5215	22.4232	22.4232	22.4232
P16422	EPCAM	3.89595	5.24608	4	26.9563	27.9578	28.0937	22.4232	22.4232	22.4232
Q9UMX0	UBQLN1	4.2217	5.2812	4	27.9352	28.0659	27.112	22.4232	22.4232	22.4232
P15531	NME1	4.22091	5.33963	4	33.2042	33.0519	33.0179	28.1472	27.9368	27.1712
P10515	DLAT	4.5874	5.36132	4	27.9838	28.0728	27.2969	22.4232	22.4232	22.4232
Q9NS69	TOMM22	8.24717	5.43114	4	27.9145	27.8242	27.8242	22.4232	22.4232	22.4232
O15372	EIF3H	3.59998	5.45014	4	28.7266	27.2389	27.6544	22.4232	22.4232	22.4232
O75964	ATP5MG	5.71998	5.4825	4	27.917	28.1254	27.6746	22.4232	22.4232	22.4232
P31942	HNRNPH3	5.11542	5.48903	4	27.8657	27.6177	28.2531	22.4232	22.4232	22.4232
P54819	AK2	3.18993	5.5351	4	29.0992	27.2816	27.494	22.4232	22.4232	22.4232
P27695	APEX1	4.59183	5.56973	4	27.7646	28.5001	27.714	22.4232	22.4232	22.4232
P04632	CAPNS1	4.18929	5.57617	4	27.5228	27.8643	28.6109	22.4232	22.4232	22.4232
P45974	USP5	7.35703	5.5843	4	27.9329	27.9828	28.1067	22.4232	22.4232	22.4232
P49755	TMED10	4.35047	5.60815	4	28.1027	27.4898	28.5015	22.4232	22.4232	22.4232
Q9BTT0	ANP32E	5.37584	5.63778	4	28.3776	27.8328	27.9724	22.4232	22.4232	22.4232
P53582	METAP1	5.634	5.68273	4	27.964	28.3897	27.964	22.4232	22.4232	22.4232
P12081	HARS1	6.91489	5.70018	4	28.2448	28.1157	28.0095	22.4232	22.4232	22.4232
P08134	RHOC	4.72783	5.70197	4	28.2571	28.4594	27.6589	22.4232	22.4232	22.4232
P63173	RPL38	3.32007	5.7518	4	27.2798	28.0636	29.1816	22.4232	22.4232	22.4232
P07437	TUBB	5.31559	5.77219	4	33.108	32.8195	33.2897	27.1265	27.4927	27.2814
P49720	PSMB3	6.09375	5.80174	4	28.4379	28.1735	28.0634	22.4232	22.4232	22.4232
Q13162	PRDX4	4.58511	5.87821	4	28.5069	28.6294	27.7678	22.4232	22.4232	22.4232
P17931	LGALS3	2.73653	5.92022	4	29.5735	28.632	26.8246	22.4232	22.4232	22.4232
Q9NQC3	RTN4	4.28933	5.94771	4	28.6586	28.7284	27.7255	22.4232	22.4232	22.4232
P62851	RPS25	3.71541	5.994	4	30.9434	30.9992	31.0995	24.5443	24.5898	25.926
P10768	ESD	4.84645	6.03186	4	28.5191	28.8304	28.0156	22.4232	22.4232	22.4232
P55769	SNU13	6.42118	6.11616	4	28.3522	28.5885	28.6773	22.4232	22.4232	22.4232
P63208	SKP1	3.88925	6.13115	4	29.391	28.0575	28.2144	22.4232	22.4232	22.4232
P62847	RPS24	3.44721	6.13726	4	27.4958	28.8815	29.304	22.4232	22.4232	22.4232
P62266	RPS23	3.75239	6.22573	4	29.004	29.2119	27.7309	22.4232	22.4232	22.4232
P25786	PSMA1	6.26571	6.25335	4	28.7255	28.469	28.8351	22.4232	22.4232	22.4232
Q13404	UBE2V1	4.32451	6.28182	4	28.3311	28.4113	29.3725	22.4232	22.4232	22.4232
P25787	PSMA2	4.93813	6.31717	4	28.2936	28.8331	29.0943	22.4232	22.4232	22.4232
Q9BUF5	TUBB6	5.39758	6.33745	4	28.4452	29.0735	28.7631	22.4232	22.4232	22.4232
P15559	NQO1	4.47824	6.34321	4	28.4574	28.4574	29.3843	22.4232	22.4232	22.4232
P00403	MT-CO2	3.0737	6.44553	4	27.4487	29.416	29.7414	22.4232	22.4232	22.4232
P63000	RAC1	7.31351	6.45332	4	28.9097	28.7578	28.9619	22.4232	22.4232	22.4232
P13693	TPT1	3.29027	6.53966	4	29.559	29.9618	29.1496	22.4232	24.2052	22.4232
P52907	CAPZA1	3.99943	6.73325	4	29.5068	29.6677	28.2948	22.4232	22.4232	22.4232
Q14011	CIRBP	6.15171	6.75809	4	29.0061	29.1139	29.4238	22.4232	22.4232	22.4232
Q86V81	ALYREF	4.10637	6.82719	4	29.6152	29.7093	28.4265	22.4232	22.4232	22.4232
P43487	RANBP1	4.60084	6.83992	4	28.7484	29.8207	29.2201	22.4232	22.4232	22.4232
P13073	COX4I1	4.03551	6.95348	4	29.7219	29.9015	28.5065	22.4232	22.4232	22.4232
P84090	ERH	7.45099	7.09247	4	29.6003	29.3944	29.5522	22.4232	22.4232	22.4232
Q13185	CBX3	5.00215	7.1465	4	30.0666	29.2075	29.4349	22.4232	22.4232	22.4232
P62829	RPL23	3.20152	7.32463	4	30.3088	30.4714	30.6996	22.4232	22.4232	24.6595
Q09028	RBBP4	5.55266	7.44287	4	29.9698	30.1393	29.489	22.4232	22.4232	22.4232
P06753	TPM3	5.39142	7.45773	4	29.4715	30.1947	29.9765	22.4232	22.4232	22.4232
P62913	RPL11	4.2654	7.46379	4	30.1303	30.6843	30.4633	22.5836	23.7193	22.5836
P62318	SNRPD3	8.45684	7.54852	4	29.9083	29.9701	30.0367	22.4232	22.4232	22.4232
P50502	ST13	5.84833	7.62767	4	30.0217	30.3558	29.775	22.4232	22.4232	22.4232
Q03135	CAV1	6.89768	7.72361	4	30.3206	30.002	30.1178	22.4232	22.4232	22.4232
O43169	CYB5B	6.09976	7.91462	4	30.0371	30.4624	30.5139	22.4232	22.4232	22.4232
E9PAV3	NACA	7.94839	7.9314	4	30.316	30.2898	30.4579	22.4232	22.4232	22.4232
Q15366	PCBP2	6.83584	8.05942	4	30.6707	30.5389	30.4956	22.4232	22.6806	22.4232
P62750	RPL23A	4.76074	8.07088	4	31.09	30.4565	29.9356	22.4232	22.4232	22.4232
P62899	RPL31	5.04907	8.12522	4	30.9366	30.7142	29.9943	22.4232	22.4232	22.4232
P50914	RPL14	6.64204	8.22104	4	30.8715	30.5588	30.5023	22.4232	22.4232	22.4232
Q01105	SET	7.32321	8.67185	4	30.9539	31.0938	31.2373	22.4232	22.4232	22.4232
P62979	RPS27A	2.44244	2.17022	5	31.7565	32.1787	32.0846	29.1768	30.2092	30.1231
Q15269	PWP2	2.11108	3.07838	5	26.7268	25.0703	24.7076	22.4232	22.4232	22.4232
Q9BXW7	HDHD5	4.10626	3.24552	5	25.4724	25.4724	26.0612	22.4232	22.4232	22.4232
P60981	DSTN	4.56079	3.32177	5	28.7243	28.791	28.7237	25.5968	25.1202	25.5567
P07741	APRT	2.83968	3.40535	5	28.8171	27.3132	28.1755	24.6923	24.6923	24.705
P48147	PREP	5.95293	3.40776	5	25.9704	25.7401	25.7823	22.4232	22.4232	22.4232
P10599	TXN	5.3449	3.45409	5	30.94	31.0966	31.2348	27.5795	27.7483	27.5813
O14745	NHERF1	2.05109	3.54664	5	26.7291	26.6999	24.4804	22.4232	22.4232	22.4232
P78347	GTF2I	3.8606	3.56591	5	26.2735	25.4931	26.2007	22.4232	22.4232	22.4232
Q13451	FKBP5	2.47696	3.57273	5	27.0328	25.0616	25.8933	22.4232	22.4232	22.4232
Q9Y285	FARSA	2.69628	3.59981	5	25.4383	25.607	27.0236	22.4232	22.4232	22.4232
O43491	EPB41L2	2.42262	3.65691	5	26.648	24.8708	26.7214	22.4232	22.4232	22.4232
P13797	PLS3	2.32557	3.66653	5	26.7487	24.8	26.7204	22.4232	22.4232	22.4232
P35250	RFC2	2.5066	3.76724	5	25.0326	26.5601	26.9786	22.4232	22.4232	22.4232
O60763	USO1	2.33741	3.77466	5	25.7519	27.4948	25.3468	22.4232	22.4232	22.4232
Q16401	PSMD5	5.2775	3.79063	5	26.1342	26.0644	26.4428	22.4232	22.4232	22.4232
Q99436	PSMB7	2.39121	3.86823	5	26.633	27.2118	25.0294	22.4232	22.4232	22.4232
Q9UBQ7	GRHPR	2.20377	3.8975	5	26.7797	27.3115	24.8708	22.4232	22.4232	22.4232
Q8TAT6	NPLOC4	2.37324	3.92111	5	26.762	27.2365	25.0342	22.4232	22.4232	22.4232
Q96I99	SUCLG2	2.4613	3.93861	5	25.7258	25.7258	27.6338	22.4232	22.4232	22.4232
Q16555	DPYSL2	2.61644	4.03294	5	27.5647	25.5444	26.2592	22.4232	22.4232	22.4232
P18031	PTPN1	4.39617	4.04097	5	26.7132	26.0544	26.6248	22.4232	22.4232	22.4232
O43396	TXNL1	2.92127	4.06504	5	25.9931	25.9931	27.4783	22.4232	22.4232	22.4232
P49756	RBM25	2.43692	4.14831	5	27.803	26.4561	25.4553	22.4232	22.4232	22.4232
Q96HC4	PDLIM5	2.71728	4.27755	5	26.1608	27.8787	26.0627	22.4232	22.4232	22.4232
Q9H0S4	DDX47	3.50144	4.37406	5	27.3047	26.0606	27.0263	22.4232	22.4232	22.4232
Q9Y678	COPG1	4.21371	4.412	5	27.284	26.8039	26.4176	22.4232	22.4232	22.4232
Q12874	SF3A3	2.98295	4.4678	5	27.8142	26.8597	25.999	22.4232	22.4232	22.4232
P32119	PRDX2	4.9078	4.48094	5	30.6427	31.0921	31.0522	26.2696	26.5039	26.5707
Q16643	DBN1	2.87686	4.65684	5	28.211	26.7571	26.272	22.4232	22.4232	22.4232
O75396	SEC22B	2.4474	4.66081	5	27.7431	28.0122	27.7592	22.4232	22.4232	24.6858
Q15717	ELAVL1	3.48462	4.66669	5	26.6084	27.8972	26.764	22.4232	22.4232	22.4232
Q92896	GLG1	3.32684	4.77412	5	26.3163	27.4323	27.8433	22.4232	22.4232	22.4232
P23381	WARS1	2.75364	4.80258	5	27.8463	27.8998	25.9311	22.4232	22.4232	22.4232
Q9NSE4	IARS2	6.58137	4.85962	5	27.2801	27.4058	27.1624	22.4232	22.4232	22.4232
Q53GQ0	HSD17B12	5.28173	4.86937	5	27.1752	27.114	27.5884	22.4232	22.4232	22.4232
P13489	RNH1	5.25873	4.88258	5	27.1612	27.6084	27.1476	22.4232	22.4232	22.4232
P53621	COPA	3.5861	4.95444	5	27.9107	26.5802	27.6419	22.4232	22.4232	22.4232
P37802	TAGLN2	3.25019	5.03536	5	27.5002	26.5663	28.3091	22.4232	22.4232	22.4232
Q14247	CTTN	6.05654	5.04989	5	27.6644	27.4204	27.3344	22.4232	22.4232	22.4232
Q96AE4	FUBP1	3.06902	5.06955	5	28.1137	27.9995	26.3649	22.4232	22.4232	22.4232
P40121	CAPG	2.97806	5.1426	5	26.4565	28.5399	27.7009	22.4232	22.4232	22.4232
Q15369	ELOC	2.54129	5.14774	5	27.9786	28.6906	26.0435	22.4232	22.4232	22.4232
P35659	DEK	4.90973	5.21176	5	27.6959	27.9428	27.2661	22.4232	22.4232	22.4232
Q86XP3	DDX42	4.6939	5.32376	5	27.6999	28.1647	27.3762	22.4232	22.4232	22.4232
Q14978	NOLC1	4.69876	5.32919	5	28.2051	27.4731	27.5788	22.4232	22.4232	22.4232
Q13347	EIF3I	5.10032	5.36407	5	28.1448	27.6698	27.5471	22.4232	22.4232	22.4232
Q9UKM9	RALY	4.68047	5.45258	5	27.5033	27.8104	28.3136	22.4232	22.4232	22.4232
Q14847	LASP1	4.77323	5.51153	5	28.0167	28.2791	27.5082	22.4232	22.4232	22.4232
P25788	PSMA3	3.34233	5.51641	5	27.472	27.3644	28.9823	22.4232	22.4232	22.4232
P14550	AKR1A1	4.30442	5.52132	5	28.5395	27.647	27.647	22.4232	22.4232	22.4232
Q9UMS4	PRPF19	3.50376	5.5641	5	28.4583	27.0296	28.4739	22.4232	22.4232	22.4232
P43686	PSMC4	4.57538	5.58653	5	27.5259	28.1002	28.403	22.4232	22.4232	22.4232
Q96KP4	CNDP2	5.13217	5.6405	5	28.1846	28.3119	27.6946	22.4232	22.4232	22.4232
O43852	CALU	6.85296	5.65891	5	28.1985	27.9565	28.0912	22.4232	22.4232	22.4232
P11413	G6PD	4.72017	5.69757	5	27.6384	28.3519	28.3718	22.4232	22.4232	22.4232
O60832	DKC1	6.13334	5.70309	5	27.9191	28.2748	28.1848	22.4232	22.4232	22.4232
P39748	FEN1	2.82211	5.73829	5	29.1687	28.6018	26.7139	22.4232	22.4232	22.4232
P55036	PSMD4	5.5313	5.81107	5	28.4783	28.2748	27.9496	22.4232	22.4232	22.4232
P31947	SFN	2.35498	5.82186	5	29.2683	28.4976	29.7721	22.4232	25.226	22.4232
Q7L1Q6	BZW1	7.06291	5.91802	5	28.2785	28.2742	28.4709	22.4232	22.4232	22.4232
P62333	PSMC6	9.79648	6.01608	5	28.4655	28.4328	28.4195	22.4232	22.4232	22.4232
Q9Y6C9	MTCH2	7.31746	6.0594	5	28.4181	28.4326	28.597	22.4232	22.4232	22.4232
P28074	PSMB5	5.6347	6.10787	5	28.6547	28.2278	28.7106	22.4232	22.4232	22.4232
Q15365	PCBP1	6.2893	6.12565	5	31.0791	31.0113	31.1424	25.1471	24.8432	24.8656
P30044	PRDX5	2.66024	6.19854	5	28.6184	29.8463	29.7721	22.4232	22.4232	24.795
P22087	FBL	5.95871	6.22899	5	28.8477	28.7001	28.4087	22.4232	22.4232	22.4232
P60228	EIF3E	7.03616	6.25311	5	28.5416	28.7133	28.774	22.4232	22.4232	22.4232
O43399	TPD52L2	3.9467	6.25414	5	27.8494	29.0392	29.1434	22.4232	22.4232	22.4232
P68036	UBE2L3	6.9289	6.2689	5	28.667	28.5779	28.8313	22.4232	22.4232	22.4232
Q04917	YWHAH	5.86037	6.29125	5	28.9645	28.69	28.4888	22.4232	22.4232	22.4232
P16070	CD44	6.82928	6.31766	5	28.762	28.5943	28.8662	22.4232	22.4232	22.4232
P63162	SNRPN	4.31919	6.34895	5	29.2962	28.8831	28.1371	22.4232	22.4232	22.4232
Q02543	RPL18A	3.1596	6.44327	5	29.7444	29.8033	28.8894	24.2611	22.4232	22.4232
P49321	NASP	7.75964	6.5228	5	28.9468	29.0285	28.8627	22.4232	22.4232	22.4232
Q92688	ANP32B	5.7403	6.5872	5	28.7412	29.0128	29.2771	22.4232	22.4232	22.4232
P62910	RPL32	4.69382	6.59492	5	29.1972	29.3944	28.4626	22.4232	22.4232	22.4232
P54727	RAD23B	5.18568	6.6466	5	28.7108	29.4542	29.0442	22.4232	22.4232	22.4232
P42167	TMPO	3.92467	6.69671	5	29.7755	28.2576	29.3266	22.4232	22.4232	22.4232
P63241	EIF5A	4.05021	6.8287	5	29.9557	29.3176	28.4822	22.4232	22.4232	22.4232
P46783	RPS10	5.63971	6.92626	5	29.4706	29.5684	29.0093	22.4232	22.4232	22.4232
O75367	MACROH2A1	4.99513	7.06011	5	29.437	29.9461	29.0667	22.4232	22.4232	22.4232
P61981	YWHAG	6.29796	7.1422	5	29.3466	29.5828	29.7668	22.4232	22.4232	22.4232
P52815	MRPL12	6.19662	7.21513	5	29.3873	29.8242	29.7034	22.4232	22.4232	22.4232
P26583	HMGB2	8.11004	7.23872	5	29.6686	29.5836	29.7335	22.4232	22.4232	22.4232
P19105	MYL12A	4.01849	7.24503	5	30.2177	28.7521	30.0349	22.4232	22.4232	22.4232
P62753	RPS6	4.82973	7.41406	5	30.3875	29.7444	29.3798	22.4232	22.4232	22.4232
P67809	YBX1	5.20224	7.42992	5	30.0734	30.1084	29.3774	22.4232	22.4232	22.4232
P31946	YWHAB	6.57856	7.60586	5	29.8456	30.2265	30.0149	22.4232	22.4232	22.4232
P00505	GOT2	8.87208	7.80897	5	30.2745	30.2482	30.1737	22.4232	22.4232	22.4232
P83731	RPL24	6.09059	7.85933	5	30.1632	30.1023	30.5821	22.4232	22.4232	22.4232
P62888	RPL30	10.1238	7.87992	5	30.2996	30.2793	30.3303	22.4232	22.4232	22.4232
Q01469	FABP5	7.23475	8.15627	5	30.7392	30.4768	30.5222	22.4232	22.4232	22.4232
P25398	RPS12	7.62887	8.30845	5	30.8534	30.7136	30.6278	22.4232	22.4232	22.4232
P08708	RPS17	12.1274	8.45188	5	30.865	30.8793	30.8807	22.4232	22.4232	22.4232
P24534	EEF1B2	5.05483	8.51531	5	30.4134	30.9604	31.4417	22.4232	22.4232	22.4232
Q07020	RPL18	5.91445	8.63189	5	31.276	30.6911	31.1981	22.4232	22.4232	22.4232
Q8WUH6	TMEM263	5.16618	8.95535	5	31.78	31.5473	30.8082	22.4232	22.4232	22.4232
P26373	RPL13	6.89001	8.98684	5	31.2669	31.3396	31.6235	22.4232	22.4232	22.4232
Q71DI3	H3C13	7.49598	11.5293	5	34.099	33.7653	33.9933	22.4232	22.4232	22.4232
P62917	RPL8	2.14221	2.03625	6	30.0329	30.6905	29.3561	28.2022	27.795	27.9736
P38159	RBMX	5.20349	2.46202	6	30.0021	29.8364	29.7915	27.3687	27.3687	27.5066
P15924	DSP	8.98827	2.56758	6	24.9815	24.9815	25.0093	22.4232	22.4232	22.4232
P62191	PSMC1	2.84974	3.20917	6	28.9321	27.7902	28.2434	24.6514	25.4404	25.2463
Q01082	SPTBN1	3.53426	3.38716	6	26.0272	25.2429	26.1608	22.4232	22.4232	22.4232
Q16795	NDUFA9	2.75796	3.61745	6	26.4	26.6439	25.078	22.4232	22.4232	22.4232
Q9Y446	PKP3	3.01975	3.81362	6	25.8335	25.7656	27.1113	22.4232	22.4232	22.4232
P20042	EIF2S2	2.78986	3.86244	6	25.934	25.6333	27.2895	22.4232	22.4232	22.4232
P30086	PEBP1	3.39976	3.89198	6	30.457	30.6125	31.0017	26.377	26.5985	27.4198
Q14690	PDCD11	5.01453	4.17036	6	26.8521	26.3363	26.5922	22.4232	22.4232	22.4232
Q8N1G4	LRRC47	3.11082	4.2085	6	25.7692	26.799	27.3268	22.4232	22.4232	22.4232
O75947	ATP5PD	4.32499	4.51751	6	27.0169	26.4912	27.3139	22.4232	22.4232	22.4232
P46459	NSF	2.86959	4.53358	6	25.9926	26.9132	27.9644	22.4232	22.4232	22.4232
Q9UKK9	NUDT5	3.09495	4.60577	6	26.29	26.8013	27.9955	22.4232	22.4232	22.4232
Q14103	HNRNPD	2.34237	4.63727	6	30.9122	31.2275	31.1816	25.6688	25.6688	28.0718
P49591	SARS1	3.19569	4.78222	6	26.2752	27.3819	27.959	22.4232	22.4232	22.4232
Q9UNX4	WDR3	4.9707	4.78225	6	27.0434	27.5554	27.0174	22.4232	22.4232	22.4232
Q9NQW7	XPNPEP1	3.72075	4.79853	6	26.4972	27.6355	27.5325	22.4232	22.4232	22.4232
Q12788	TBL3	4.02583	4.81281	6	27.1539	27.8005	26.7535	22.4232	22.4232	22.4232
P47897	QARS1	3.10487	4.83228	6	28.1101	26.2939	27.3624	22.4232	22.4232	22.4232
P00367	GLUD1	2.39051	4.87059	6	27.5669	25.7528	28.5615	22.4232	22.4232	22.4232
Q9NYF8	BCLAF1	4.01882	4.90519	6	27.9311	27.1678	26.8862	22.4232	22.4232	22.4232
Q14258	TRIM25	5.35125	4.91395	6	27.5673	27.0708	27.3733	22.4232	22.4232	22.4232
O60701	UGDH	3.65922	4.94922	6	26.8516	27.1329	28.1326	22.4232	22.4232	22.4232
P69849	NOMO3	4.33308	5.01686	6	27.745	26.9103	27.6648	22.4232	22.4232	22.4232
P17655	CAPN2	3.81438	5.07808	6	27.1371	28.2295	27.1371	22.4232	22.4232	22.4232
P47895	ALDH1A3	5.20337	5.11792	6	27.8519	27.4755	27.2958	22.4232	22.4232	22.4232
P06454	PTMA	2.10078	5.18194	6	31.5153	31.7899	28.6696	25.2163	25.0657	26.1468
Q15459	SF3A1	7.08577	5.25937	6	27.7948	27.6105	27.6423	22.4232	22.4232	22.4232
Q13148	TARDBP	4.68995	5.3742	6	27.818	28.1877	27.3864	22.4232	22.4232	22.4232
P31040	SDHA	4.27984	5.47404	6	28.4379	27.4049	27.8488	22.4232	22.4232	22.4232
Q92598	HSPH1	3.58312	5.4995	6	28.5571	28.1624	27.0485	22.4232	22.4232	22.4232
Q8NEV1	CSNK2A3	4.62653	5.59591	6	28.1793	27.5286	28.3494	22.4232	22.4232	22.4232
P30050	RPL12	3.52888	5.62101	6	30.3944	31.2227	31.3469	25.9645	24.6866	25.4498
O43242	PSMD3	4.29789	5.63495	6	28.0388	28.5954	27.5402	22.4232	22.4232	22.4232
P23284	PPIB	3.93835	5.68463	6	30.9749	31.3982	30.2392	25.0156	25.5272	25.0156
Q9HB71	CACYBP	3.56166	5.72019	6	28.7084	28.5238	27.1978	22.4232	22.4232	22.4232
P51572	BCAP31	5.67526	5.73324	6	28.2047	28.3707	27.8938	22.4232	22.4232	22.4232
Q16543	CDC37	4.77192	5.74852	6	27.7085	28.3232	28.4834	22.4232	22.4232	22.4232
Q8N163	CCAR2	6.69243	5.75236	6	28.2055	28.0279	28.2932	22.4232	22.4232	22.4232
P00387	CYB5R3	5.01618	5.80314	6	28.2545	28.5699	27.8545	22.4232	22.4232	22.4232
Q96C36	PYCR2	2.90879	5.87254	6	28.2206	29.2318	29.3199	24.3084	22.4232	22.4232
Q99714	HSD17B10	4.15492	5.9628	6	27.7064	28.8745	28.5771	22.4232	22.4232	22.4232
P28331	NDUFS1	6.97087	6.00893	6	28.5225	28.2956	28.4783	22.4232	22.4232	22.4232
Q15084	PDIA6	4.20269	6.11923	6	29.2058	28.4032	28.0182	22.4232	22.4232	22.4232
P18754	RCC1	6.40715	6.17636	6	28.7462	28.6408	28.4116	22.4232	22.4232	22.4232
P51148	RAB5C	5.90353	6.30331	6	28.5278	28.9835	28.6681	22.4232	22.4232	22.4232
P05091	ALDH2	7.32022	6.33513	6	28.6385	28.8182	28.8181	22.4232	22.4232	22.4232
P41250	GARS1	6.88409	6.34107	6	28.8022	28.6159	28.8746	22.4232	22.4232	22.4232
P09622	DLD	5.62937	6.43784	6	28.545	29.0741	28.9639	22.4232	22.4232	22.4232
O43776	NARS1	5.44314	6.49617	6	29.267	28.6576	28.8335	22.4232	22.4232	22.4232
O00154	ACOT7	5.57503	6.5146	6	28.9499	28.6404	29.223	22.4232	22.4232	22.4232
P48047	ATP5PO	2.25659	6.56816	6	30.4897	30.378	29.6377	25.9546	22.4232	22.4232
P20618	PSMB1	4.71257	6.58285	6	28.5546	28.9449	29.5185	22.4232	22.4232	22.4232
P62316	SNRPD2	5.02587	6.77764	6	29.2242	28.7732	29.605	22.4232	22.4232	22.4232
P25789	PSMA4	8.13237	6.83197	6	29.175	29.2855	29.3049	22.4232	22.4232	22.4232
O00303	EIF3F	6.14946	6.97661	6	29.6584	29.2795	29.2614	22.4232	22.4232	22.4232
P09972	ALDOC	3.49576	7.02055	6	29.9894	28.2316	30.1101	22.4232	22.4232	22.4232
P28066	PSMA5	7.06262	7.02385	6	29.5933	29.4154	29.3323	22.4232	22.4232	22.4232
P36542	ATP5F1C	4.66077	7.04529	6	30.0847	29.1278	29.1928	22.4232	22.4232	22.4232
P39687	ANP32A	4.55005	7.09471	6	30.0303	29.626	28.8973	22.4232	22.4232	22.4232
O14979	HNRNPDL	6.6727	7.21661	6	29.5352	29.5464	29.8377	22.4232	22.4232	22.4232
Q92945	KHSRP	9.56198	7.28415	6	29.715	29.7356	29.6714	22.4232	22.4232	22.4232
P62081	RPS7	4.54123	7.52629	6	30.6458	29.496	29.7066	22.4232	22.4232	22.4232
Q13151	HNRNPA0	3.14488	7.55235	6	30.0655	28.5398	31.3212	22.4232	22.4232	22.4232
P32969	RPL9	6.04963	7.83524	6	30.2516	30.5284	29.9952	22.4232	22.4232	22.4232
P16949	STMN1	7.10624	7.87145	6	30.4598	30.2398	30.1842	22.4232	22.4232	22.4232
P30048	PRDX3	7.83832	8.06857	6	30.4032	30.4749	30.5971	22.4232	22.4232	22.4232
P39019	RPS19	4.51297	8.12169	6	30.8669	30.9093	31.0141	22.4232	23.5789	22.4232
P29692	EEF1D	7.67824	8.32435	6	30.6419	30.863	30.7377	22.4232	22.4232	22.4232
P62277	RPS13	6.00687	8.8294	6	31.5744	31.2226	30.9607	22.4232	22.4232	22.4232
P09382	LGALS1	6.33345	8.95444	6	31.6104	31.4234	31.099	22.4232	22.4232	22.4232
P0DP25	CALM3	7.37103	9.22347	6	31.5099	31.8015	31.6285	22.4232	22.4232	22.4232
P09211	GSTP1	6.08411	9.7297	6	32.22	31.7999	32.4386	22.4232	22.4232	22.4232
P61604	HSPE1	8.27229	9.97692	6	32.368	32.5063	32.3259	22.4232	22.4232	22.4232
Q00325	SLC25A3	4.28532	3.44779	7	30.3757	30.6945	30.393	27.3535	26.8832	26.8832
Q9NZM1	MYOF	3.6695	3.66199	7	26.6043	25.6181	26.033	22.4232	22.4232	22.4232
Q9UQ35	SRRM2	4.35395	4.2754	7	26.4922	27.1458	26.4577	22.4232	22.4232	22.4232
O75534	CSDE1	4.66688	4.47983	7	26.8035	26.6251	27.2804	22.4232	22.4232	22.4232
Q14126	DSG2	2.8094	4.58904	7	28.1167	26.8575	26.0624	22.4232	22.4232	22.4232
P46013	MKI67	3.18044	4.76709	7	28.0947	27.0949	26.3812	22.4232	22.4232	22.4232
P27635	RPL10	4.05719	4.81832	7	30.473	30.4681	30.7533	26.2168	25.789	25.2337
P05198	EIF2S1	2.5747	4.86483	7	28.2155	25.843	27.8054	22.4232	22.4232	22.4232
O60716	CTNND1	3.63983	4.8692	7	26.5394	27.8226	27.515	22.4232	22.4232	22.4232
Q15046	KARS1	5.37616	4.96746	7	27.1096	27.5851	27.4772	22.4232	22.4232	22.4232
O95373	IPO7	2.77871	4.98619	7	26.0978	28.2227	27.9077	22.4232	22.4232	22.4232
Q7L014	DDX46	5.28094	5.01111	7	27.7027	27.1714	27.4287	22.4232	22.4232	22.4232
P60660	MYL6	4.16013	5.09758	7	30.4761	30.4753	30.4465	25.9415	25.2269	24.9367
P23921	RRM1	5.68536	5.10351	7	27.5747	27.2925	27.7129	22.4232	22.4232	22.4232
Q9Y262	EIF3L	6.92128	5.12162	7	27.5456	27.6499	27.4389	22.4232	22.4232	22.4232
O43143	DHX15	3.46208	5.21653	7	28.1052	28.0944	26.7195	22.4232	22.4232	22.4232
P62249	RPS16	3.15968	5.23483	7	31.5748	31.5183	31.5089	26.5913	27.0753	25.2309
P78417	GSTO1	4.12739	5.32955	7	28.3871	27.4815	27.3895	22.4232	22.4232	22.4232
Q8IY81	FTSJ3	4.02796	5.35499	7	28.2319	27.1151	27.9874	22.4232	22.4232	22.4232
Q9Y3I0	RTCB	5.18078	5.43403	7	28.0714	27.9925	27.5076	22.4232	22.4232	22.4232
P52597	HNRNPF	4.88659	5.44102	7	30.767	30.8831	30.2145	25.2507	25.1454	25.1454
P04844	RPN2	2.21407	5.50489	7	28.9336	29.1767	28.7729	25.5222	22.4232	22.4232
Q99613	EIF3C	4.37069	5.53585	7	28.4945	27.5121	27.8705	22.4232	22.4232	22.4232
Q5SSJ5	HP1BP3	3.64479	5.64164	7	28.328	28.6728	27.1936	22.4232	22.4232	22.4232
Q9UNM6	PSMD13	8.13287	5.73327	7	28.0903	28.2027	28.1764	22.4232	22.4232	22.4232
O00232	PSMD12	6.44351	5.77017	7	28.3186	28.0179	28.2434	22.4232	22.4232	22.4232
P05455	SSB	5.31029	5.8151	7	28.2678	28.5256	27.9215	22.4232	22.4232	22.4232
P31153	MAT2A	3.46801	6.03961	7	28.9291	29.1715	28.8542	23.9896	22.4232	22.4232
P12814	ACTN1	5.52913	6.06381	7	28.7553	28.5064	28.1991	22.4232	22.4232	22.4232
P26196	DDX6	5.02948	6.06472	7	28.0642	28.7598	28.6397	22.4232	22.4232	22.4232
P23528	CFL1	3.46586	6.1676	7	32.7223	32.6531	32.4772	27.5249	25.9477	25.8773
Q00796	SORD	5.4613	6.19287	7	28.9067	28.3151	28.6263	22.4232	22.4232	22.4232
P62826	RAN	4.48319	6.22504	7	32.2449	31.5527	31.9278	26.1368	25.4567	25.4567
Q99536	VAT1	5.13569	6.3149	7	28.5294	28.5262	29.1585	22.4232	22.4232	22.4232
Q9UJZ1	STOML2	6.75178	6.42853	7	29.0201	28.7614	28.7735	22.4232	22.4232	22.4232
Q96AG4	LRRC59	5.52033	6.58707	7	31.2795	30.8178	31.2881	24.7052	24.4595	24.4595
P31930	UQCRC1	5.6382	6.66464	7	29.2886	28.7584	29.2164	22.4232	22.4232	22.4232
Q13283	G3BP1	4.3374	6.69999	7	28.5371	29.7607	29.0718	22.4232	22.4232	22.4232
P54886	ALDH18A1	6.50564	6.72135	7	29.209	28.9455	29.279	22.4232	22.4232	22.4232
P46779	RPL28	4.00932	6.72629	7	29.7999	28.336	29.3124	22.4232	22.4232	22.4232
P17174	GOT1	6.8084	6.84386	7	29.3916	29.0999	29.3095	22.4232	22.4232	22.4232
P31943	HNRNPH1	5.15689	7.18931	7	31.8896	31.8808	31.8115	24.4362	24.4362	25.1416
P52209	PGD	6.05907	7.19182	7	29.5689	29.3979	29.8782	22.4232	22.4232	22.4232
P51149	RAB7A	5.04572	7.3029	7	29.8932	29.2232	30.0617	22.4232	22.4232	22.4232
P04181	OAT	5.91215	7.34587	7	29.4569	29.9117	29.9385	22.4232	22.4232	22.4232
P37837	TALDO1	7.64367	7.37364	7	29.7511	29.9117	29.7277	22.4232	22.4232	22.4232
P50395	GDI2	9.8203	7.40175	7	29.858	29.8105	29.8063	22.4232	22.4232	22.4232
Q99497	PARK7	4.54102	7.46097	7	30.197	29.1846	30.2709	22.4232	22.4232	22.4232
Q07021	C1QBP	6.19936	7.49066	7	31.9218	31.5885	31.9327	24.3393	24.4433	24.1885
P40429	RPL13A	3.97513	7.63131	7	30.3983	29.0728	30.6924	22.4232	22.4232	22.4232
P62280	RPS11	6.17521	7.73537	7	30.2686	30.329	29.8779	22.4232	22.4232	22.4232
Q9NUJ1	ABHD10	6.4775	7.84027	7	30.4526	30.2979	30.0398	22.4232	22.4232	22.4232
P62906	RPL10A	7.56513	7.92973	7	30.228	30.3835	30.4472	22.4232	22.4232	22.4232
Q15181	PPA1	8.73913	8.04617	7	30.4032	30.4919	30.5129	22.4232	22.4232	22.4232
Q02878	RPL6	4.31929	8.37995	7	31.6842	30.5004	30.2248	22.4232	22.4232	22.4232
P05387	RPLP2	5.74643	10.1469	7	32.8767	32.7308	32.1027	22.4232	22.4232	22.4232
Q9BQG0	MYBBP1A	2.3013	2.24711	8	27.3524	28.3928	28.2049	25.2855	26.115	25.8082
Q06830	PRDX1	2.57454	2.98254	8	33.9505	33.2478	34.3236	30.8296	30.3196	31.4251
P46782	RPS5	2.93006	3.63601	8	29.9248	31.1137	31.121	27.4632	26.8941	26.8941
O60264	SMARCA5	2.90028	4.4917	8	26.0533	26.7423	27.949	22.4232	22.4232	22.4232
Q9Y3F4	STRAP	5.91986	4.90346	8	27.4572	27.4012	27.1215	22.4232	22.4232	22.4232
Q8N1F7	NUP93	4.07472	5.03941	8	26.9951	28.05	27.3427	22.4232	22.4232	22.4232
P53618	COPB1	3.22082	5.0771	8	26.4681	28.0591	27.9736	22.4232	22.4232	22.4232
P16615	ATP2A2	3.88331	5.10494	8	27.8041	27.9502	26.83	22.4232	22.4232	22.4232
P30153	PPP2R1A	8.01225	5.18524	8	27.6316	27.6501	27.5435	22.4232	22.4232	22.4232
P62937	PPIA	5.79358	5.29415	8	33.3698	33.3568	33.5754	28.0966	27.9967	28.3263
P07384	CAPN1	4.5836	5.29913	8	27.2385	27.9281	28.0004	22.4232	22.4232	22.4232
Q13200	PSMD2	2.66115	5.34047	8	27.8075	29.1455	28.3006	22.4232	24.3858	22.4232
Q6UB35	MTHFD1L	4.20682	5.42862	8	27.8964	28.3643	27.2947	22.4232	22.4232	22.4232
P47756	CAPZB	4.55021	5.69123	8	28.8373	29.018	28.9836	22.995	23.7752	22.995
P22695	UQCRC2	4.83053	5.71941	8	28.3789	28.3604	27.6884	22.4232	22.4232	22.4232
P33992	MCM5	3.72616	5.76924	8	28.7548	28.4875	27.3349	22.4232	22.4232	22.4232
P26038	MSN	3.10761	5.78327	8	28.7455	28.3005	29.2666	22.4232	22.4232	24.1164
P36776	LONP1	3.58331	5.80696	8	29.0529	28.2365	27.401	22.4232	22.4232	22.4232
P39656	DDOST	5.22405	5.84933	8	28.4511	28.4639	27.9025	22.4232	22.4232	22.4232
P46060	RANGAP1	4.18004	5.87343	8	28.977	27.9569	27.9559	22.4232	22.4232	22.4232
O75874	IDH1	5.60871	5.89734	8	28.3666	28.0418	28.5532	22.4232	22.4232	22.4232
P49915	GMPS	3.54569	5.91096	8	28.8277	28.8331	27.3416	22.4232	22.4232	22.4232
P61221	ABCE1	5.60503	5.92047	8	28.6031	28.3454	28.0824	22.4232	22.4232	22.4232
P07737	PFN1	2.64155	5.98729	8	32.8704	32.8724	33.0033	28.5354	26.6714	25.5774
P41091	EIF2S3	3.48703	5.9919	8	28.719	29.1258	27.4003	22.4232	22.4232	22.4232
P09960	LTA4H	3.35044	6.29027	8	27.5283	29.3304	29.2816	22.4232	22.4232	22.4232
P60900	PSMA6	3.45031	6.29187	8	29.5399	28.9557	27.6495	22.4232	22.4232	22.4232
Q07955	SRSF1	4.08592	6.53719	8	29.3127	28.1622	29.4062	22.4232	22.4232	22.4232
Q8NBS9	TXNDC5	4.21748	6.59748	8	29.6971	28.9586	28.4062	22.4232	22.4232	22.4232
P27348	YWHAQ	2.86681	6.84451	8	29.8498	30.3713	30.1264	24.9677	22.4232	22.4232
P11387	TOP1	6.941	6.94283	8	29.2578	29.3143	29.526	22.4232	22.4232	22.4232
O75131	CPNE3	4.98878	6.97545	8	28.8933	29.6362	29.6664	22.4232	22.4232	22.4232
Q9Y266	NUDC	5.77356	7.0141	8	29.6805	29.5	29.1313	22.4232	22.4232	22.4232
Q13126	MTAP	4.93771	7.13907	8	29.6476	30.1227	29.4166	22.4232	22.4232	22.9235
O75390	CS	3.43845	7.14546	8	30.1456	30.3899	30.0652	22.4232	24.318	22.4232
P62269	RPS18	4.57606	7.46302	8	30.0037	29.2413	30.4136	22.4232	22.4232	22.4232
P12268	IMPDH2	5.45919	7.58186	8	30.077	30.3264	29.6117	22.4232	22.4232	22.4232
P18124	RPL7	3.23449	7.60908	8	30.8361	30.6017	30.9432	22.4232	24.7075	22.4232
O14818	PSMA7	8.44208	7.80784	8	30.2769	30.1541	30.262	22.4232	22.4232	22.4232
P52565	ARHGDIA	6.46494	8.00068	8	30.2359	30.6573	30.3783	22.4232	22.4232	22.4232
P23246	SFPQ	6.4114	8.1326	8	30.3088	30.7481	30.6104	22.4232	22.4232	22.4232
Q9Y277	VDAC3	6.30783	8.14309	8	30.3006	30.7632	30.6349	22.4232	22.4232	22.4232
O96008	TOMM40	7.32998	8.19498	8	30.6125	30.7543	30.4877	22.4232	22.4232	22.4232
P46781	RPS9	4.55214	8.37068	8	31.2533	31.1114	30.0169	22.4232	22.4232	22.4232
P35232	PHB1	4.51871	8.71838	8	31.5584	31.5707	31.5396	22.4232	22.4232	23.6673
P62241	RPS8	8.05001	9.34158	8	31.849	31.6536	31.7917	22.4232	22.4232	22.4232
O60664	PLIN3	4.15964	3.59114	9	29.8285	29.2028	29.2376	25.7763	25.943	25.7763
O00571	DDX3X	2.91203	4.11019	9	27.1936	28.6711	28.7341	24.0846	24.099	24.0846
P27708	CAD	2.86332	4.23576	9	25.6266	26.9363	27.4139	22.4232	22.4232	22.4232
P17844	DDX5	4.46075	4.68581	9	30.1289	30.095	29.5094	24.9998	25.3453	25.3308
Q07065	CKAP4	2.42698	4.74205	9	27.5543	27.9781	28.2339	22.4232	22.4232	24.6938
Q8WUM4	PDCD6IP	3.1249	5.08829	9	28.0194	26.4158	28.0992	22.4232	22.4232	22.4232
P04792	HSPB1	5.20725	5.22339	9	31.0335	30.5706	30.8011	25.4857	25.4713	25.7781
P63010	AP2B1	2.69303	5.42044	9	28.9047	28.6625	28.1339	22.4232	22.4232	24.5936
P15880	RPS2	4.68052	5.43393	9	30.7032	30.7965	30.9364	25.017	25.3247	25.7925
O60841	EIF5B	6.41991	5.63077	9	28.185	28.0936	27.8831	22.4232	22.4232	22.4232
Q08945	SSRP1	4.36087	5.72175	9	27.651	28.6818	28.102	22.4232	22.4232	22.4232
Q86VP6	CAND1	4.74255	5.94526	9	28.8006	28.3647	27.9399	22.4232	22.4232	22.4232
Q01518	CAP1	3.43879	6.05534	9	28.0327	29.5562	27.8467	22.4232	22.4232	22.4232
P17980	PSMC3	5.52114	6.10497	9	28.3738	28.3572	28.8534	22.4232	22.4232	22.4232
Q9UHD8	SEPTIN9	4.94637	6.22227	9	29.0886	28.5376	28.3101	22.4232	22.4232	22.4232
Q13435	SF3B2	4.57487	6.22612	9	29.0451	28.092	28.8107	22.4232	22.4232	22.4232
Q99460	PSMD1	4.5887	6.39514	9	28.2367	29.0604	29.1578	22.4232	22.4232	22.4232
P33993	MCM7	6.14839	6.44279	9	28.9319	29.0321	28.6339	22.4232	22.4232	22.4232
Q16891	IMMT	4.46562	6.45196	9	29.0793	29.2921	28.254	22.4232	22.4232	22.4232
O76021	RSL1D1	8.48827	6.5035	9	28.885	28.9069	28.9881	22.4232	22.4232	22.4232
Q06323	PSME1	4.24352	6.6513	9	28.4345	29.0682	29.7207	22.4232	22.4232	22.4232
O00231	PSMD11	6.83003	6.65951	9	29.2437	28.964	29.0403	22.4232	22.4232	22.4232
Q02790	FKBP4	5.48886	6.88907	9	29.6513	29.0058	29.2795	22.4232	22.4232	22.4232
P18669	PGAM1	2.04172	7.05787	9	30.8268	31.0528	31.032	22.4232	26.8916	22.4232
Q9Y617	PSAT1	6.11224	7.13623	9	29.7733	29.309	29.5959	22.4232	22.4232	22.4232
O43390	HNRNPR	6.04669	7.1665	9	29.6307	29.3274	29.8108	22.4232	22.4232	22.4232
P14314	PRKCSH	7.22912	7.33225	9	29.8688	29.7785	29.619	22.4232	22.4232	22.4232
Q8NC51	SERBP1	6.187	7.81408	9	30.3661	29.9539	30.3917	22.4232	22.4232	22.4232
Q12905	ILF2	5.96345	8.29061	9	30.8769	30.3715	30.8929	22.4232	22.4232	22.4232
Q99623	PHB2	7.4328	8.55653	9	30.8436	30.99	31.1055	22.4232	22.4232	22.4232
P45880	VDAC2	2.50674	8.86231	9	32.7084	32.7068	32.6136	22.4232	22.4232	26.5955
P00338	LDHA	3.71932	4.41636	10	32.4178	32.4352	32.5095	27.3721	28.3311	28.4102
Q14204	DYNC1H1	4.01493	4.86173	10	26.8567	27.1105	27.8875	22.4232	22.4232	22.4232
P51991	HNRNPA3	4.8833	5.12998	10	30.815	30.6458	30.2455	25.5293	25.234	25.5531
Q9P2E9	RRBP1	4.10333	5.29388	10	27.0835	27.9473	28.1203	22.4232	22.4232	22.4232
P56192	MARS1	3.44052	5.46221	10	27.9697	27.0012	28.6852	22.4232	22.4232	22.4232
P49748	ACADVL	5.36358	5.49445	10	27.8944	27.6522	28.2063	22.4232	22.4232	22.4232
Q9Y4L1	HYOU1	2.44469	5.74106	10	28.6435	29.2023	29.3776	22.4232	22.4232	25.1539
Q15393	SF3B3	3.91149	5.79556	10	27.4355	28.6598	28.5608	22.4232	22.4232	22.4232
P46087	NOP2	4.13615	6.10162	10	28.71	27.825	29.0394	22.4232	22.4232	22.4232
O75533	SF3B1	6.3694	6.1502	10	28.4011	28.7492	28.5699	22.4232	22.4232	22.4232
P46777	RPL5	5.31544	6.16639	10	30.7849	31.2019	30.8265	25.0295	24.6423	24.6423
P62424	RPL7A	5.23693	6.45995	10	30.8647	30.7449	30.8227	24.7504	24.1511	24.1511
P35221	CTNNA1	4.12819	6.52737	10	28.3173	28.8736	29.6607	22.4232	22.4232	22.4232
P61247	RPS3A	4.71631	6.54527	10	31.35	31.6757	31.7699	24.7684	25.545	24.8465
P14923	JUP	4.75781	6.59788	10	28.5763	29.5187	28.9682	22.4232	22.4232	22.4232
P26599	PTBP1	3.92651	6.64771	10	31.5639	31.3262	31.2537	25.4614	24.787	23.9522
Q01813	PFKP	5.67542	6.68719	10	28.8097	29.3699	29.1515	22.4232	22.4232	22.4232
Q92841	DDX17	2.76691	6.84199	10	30.2976	30.196	30.0376	22.4232	25.1589	22.4232
P30041	PRDX6	2.68068	6.96471	10	30.3381	30.2368	30.5236	22.4232	22.4232	25.358
P39023	RPL3	3.11566	7.09939	10	30.729	30.8618	30.4051	22.8087	22.8087	25.0803
P05388	RPLP0	4.09464	7.40896	10	32.2913	32.0968	31.7232	24.2808	25.4625	24.1412
P61313	RPL15	5.39795	7.81872	10	29.955	30.6827	30.0879	22.4232	22.4232	22.4232
P06748	NPM1	3.50281	8.15294	10	32.497	32.8062	32.8958	23.7621	24.0231	25.955
Q9UQ80	PA2G4	7.39804	8.23609	10	30.7456	30.7211	30.5111	22.4232	22.4232	22.4232
P63104	YWHAZ	5.50159	8.47798	10	32.5657	32.8304	32.7276	24.6522	24.09	23.9475
P12004	PCNA	5.61323	9.07831	10	31.0929	31.8866	31.525	22.4232	22.4232	22.4232
P12277	CKB	8.4812	9.35765	10	31.7152	31.7594	31.8678	22.4232	22.4232	22.4232
P08865	RPSA	7.0987	9.79148	10	32.3338	32.005	32.3051	22.4232	22.4232	22.4232
P62805	H4C1	10.3574	13.1743	10	35.6088	35.628	35.5556	22.4232	22.4232	22.4232
P55060	CSE1L	4.33942	3.58281	11	29.6918	29.7236	30.271	26.2915	26.355	26.2915
P55884	EIF3B	4.41012	3.91495	11	28.8372	29.1573	29.3059	25.0429	25.4697	25.0429
P68104	EEF1A1	3.59982	4.28975	11	35.3067	35.3236	35.0142	31.3727	31.131	30.2716
Q13813	SPTAN1	3.32361	4.66899	11	26.9753	27.9182	26.383	22.4232	22.4232	22.4232
P62701	RPS4X	3.01511	5.13125	11	31.9955	31.7423	31.4615	26.5407	27.6184	25.6465
P33991	MCM4	2.77792	5.90372	11	26.8575	28.5864	29.5368	22.4232	22.4232	22.4232
P28838	LAP3	6.64731	6.195	11	28.5544	28.5112	28.7889	22.4232	22.4232	22.4232
P43490	NAMPT	8.23745	6.52519	11	28.8818	28.9562	29.007	22.4232	22.4232	22.4232
P14868	DARS1	6.14378	6.64862	11	29.028	28.8828	29.3046	22.4232	22.4232	22.4232
P55786	NPEPPS	6.52435	6.92104	11	29.1971	29.5437	29.2918	22.4232	22.4232	22.4232
P40939	HADHA	6.18208	6.94223	11	29.6018	29.1697	29.3248	22.4232	22.4232	22.4232
Q9Y230	RUVBL2	6.19315	7.10653	11	29.3532	29.4561	29.7798	22.4232	22.4232	22.4232
Q14974	KPNB1	6.88788	7.33914	11	29.7018	29.6476	29.9375	22.4232	22.4232	22.4232
P62195	PSMC5	8.91255	7.35044	11	29.7251	29.8214	29.7743	22.4232	22.4232	22.4232
Q9Y265	RUVBL1	5.58344	7.75487	11	30.3276	30.4233	29.7831	22.4232	22.4232	22.4232
P12429	ANXA3	5.90677	7.9827	11	30.5067	30.6372	30.0737	22.4232	22.4232	22.4232
P06744	GPI	6.02214	8.37165	11	30.8221	30.4927	31.0696	22.4232	22.4232	22.4232
P40925	MDH1	7.29552	8.39597	11	30.8637	30.9308	30.6629	22.4232	22.4232	22.4232
P27797	CALR	5.99219	8.51762	11	31.1297	31.0973	30.5953	22.4232	22.4232	22.4232
P27824	CANX	7.68522	8.54129	11	30.8675	31.089	30.9368	22.4232	22.4232	22.4232
P11940	PABPC1	7.10713	8.7808	11	31.3196	31.2741	31.0182	22.4232	22.4232	22.4232
P07910	HNRNPC	6.264	9.7011	11	32.2629	32.3209	31.789	22.4232	22.4232	22.4232
P04843	RPN1	7.70952	4.3973	12	30.3701	30.4036	30.4686	26.0005	26.0496	26.0005
Q14980	NUMA1	2.6865	5.16708	12	26.9099	29.041	26.8198	22.4232	22.4232	22.4232
Q14566	MCM6	9.71132	5.21437	12	27.618	27.6339	27.6606	22.4232	22.4232	22.4232
Q6P2Q9	PRPF8	3.5604	5.47528	12	28.3557	28.3526	26.987	22.4232	22.4232	22.4232
P54577	YARS1	2.14225	5.50252	12	29.1628	28.6911	29.1552	22.4232	22.4232	25.6552
P12270	TPR	6.0322	5.69916	12	27.898	28.2598	28.2092	22.4232	22.4232	22.4232
P05165	PCCA	2.29168	5.79583	12	29.0301	29.0897	29.6123	22.4232	22.4232	25.4983
Q9Y490	TLN1	6.5192	5.90606	12	28.1746	28.3317	28.4813	22.4232	22.4232	22.4232
P08133	ANXA6	3.21486	5.99696	12	27.2147	28.834	29.2116	22.4232	22.4232	22.4232
P26639	TARS1	5.45217	6.0921	12	28.7026	28.6651	28.1781	22.4232	22.4232	22.4232
Q16531	DDB1	4.38134	6.29614	12	28.1303	28.7782	29.2495	22.4232	22.4232	22.4232
O00410	IPO5	6.45279	6.68709	12	29.224	29.2045	28.9022	22.4232	22.4232	22.4232
P53396	ACLY	5.52138	6.78856	12	29.5625	28.9596	29.113	22.4232	22.4232	22.4232
Q9Y5B9	SUPT16H	4.98658	6.82882	12	29.0217	29.7472	28.9871	22.4232	22.4232	22.4232
Q04637	EIF4G1	5.53494	6.83388	12	28.9524	29.5777	29.241	22.4232	22.4232	22.4232
P27816	MAP4	6.42131	6.889	12	29.0972	29.3853	29.4539	22.4232	22.4232	22.4232
P14866	HNRNPL	8.53435	7.03887	12	29.4037	29.4641	29.5182	22.4232	22.4232	22.4232
P18206	VCL	5.93358	7.06468	12	29.5957	29.6734	29.1944	22.4232	22.4232	22.4232
P50995	ANXA11	6.93842	7.3995	12	29.995	29.714	29.759	22.4232	22.4232	22.4232
P38919	EIF4A3	4.78242	7.48091	12	29.6539	29.5464	30.5119	22.4232	22.4232	22.4232
P23526	AHCY	4.51745	7.59608	12	30.2451	29.3112	30.5014	22.4232	22.4232	22.4232
Q16658	FSCN1	4.6018	7.67051	12	29.4188	30.285	30.5771	22.4232	22.4232	22.4232
P63244	RACK1	6.41836	7.90389	12	30.5258	30.3607	30.0947	22.4232	22.4232	22.4232
Q12931	TRAP1	6.77764	8.45962	12	30.9799	31.0038	30.6647	22.4232	22.4232	22.4232
P34897	SHMT2	6.34803	8.56533	12	30.7281	31.0218	31.2156	22.4232	22.4232	22.4232
P36551	CPOX	6.19366	8.8565	12	31.0145	31.2566	31.5679	22.4232	22.4232	22.4232
O00299	CLIC1	6.68658	8.86318	12	31.13	31.2053	31.5237	22.4232	22.4232	22.4232
P22234	PAICS	7.64926	8.87569	12	31.1642	31.3371	31.3953	22.4232	22.4232	22.4232
P22626	HNRNPA2B1	6.94294	9.65056	12	31.8725	32.2647	32.084	22.4232	22.4232	22.4232
P36578	RPL4	4.98971	6.12712	13	32.1975	31.6158	32.0377	25.9916	25.5488	25.9293
O75369	FLNB	5.22655	6.51255	13	28.6047	28.8896	29.3129	22.4232	22.4232	22.4232
Q14697	GANAB	5.32275	6.69558	13	29.1854	28.7437	29.4271	22.4232	22.4232	22.4232
P40227	CCT6A	4.00018	6.75988	13	31.838	31.914	32.3409	24.9515	24.785	26.0768
P25205	MCM3	7.83795	6.85527	13	29.3434	29.3073	29.1845	22.4232	22.4232	22.4232
O43175	PHGDH	3.7314	7.21479	13	29.269	30.5664	30.2193	22.4232	22.4232	23.5639
P35998	PSMC2	4.16867	7.21735	13	28.8389	30.2635	29.8192	22.4232	22.4232	22.4232
P09651	HNRNPA1	3.02535	7.69475	13	32.3526	32.3522	32.1122	25.1818	25.7006	22.8504
Q99873	PRMT1	6.01629	7.84873	13	29.966	30.362	30.4877	22.4232	22.4232	22.4232
P08195	SLC3A2	7.62509	8.0518	13	30.5555	30.3489	30.5205	22.4232	22.4232	22.4232
P08758	ANXA5	7.74691	8.83004	13	31.1341	31.2666	31.359	22.4232	22.4232	22.4232
P21796	VDAC1	7.82162	10.6531	13	32.9631	33.0464	33.2193	22.4232	22.4232	22.4232
P40926	MDH2	4.27483	3.2807	14	32.6102	32.5655	32.2473	29.3645	28.9185	29.2979
P07195	LDHB	5.43978	4.95804	14	33.8608	33.8328	33.7653	28.7414	28.7112	29.1321
Q9P2J5	LARS1	2.26724	5.18719	14	28.7788	28.3716	28.4982	25.2407	22.4232	22.4232
P61978	HNRNPK	4.3566	5.54309	14	33.0753	32.9306	32.8077	27.9516	27.0784	27.1544
O14980	XPO1	4.30207	6.17039	14	28.5447	29.1931	28.0429	22.4232	22.4232	22.4232
P54136	RARS1	4.80673	6.17705	14	28.1035	28.8249	28.8722	22.4232	22.4232	22.4232
P07814	EPRS1	6.96968	6.53393	14	28.8831	28.88	29.1082	22.4232	22.4232	22.4232
P41252	IARS1	5.17572	6.66658	14	29.2201	28.6663	29.3829	22.4232	22.4232	22.4232
P26641	EEF1G	10.011	9.03337	14	31.4266	31.4892	31.4538	22.4232	22.4232	22.4232
P04083	ANXA1	4.01491	9.17148	14	32.3022	31.9444	32.2591	24.145	22.4232	22.4232
O60506	SYNCRIP	10.2328	9.18481	14	31.6055	31.6372	31.5812	22.4232	22.4232	22.4232
P60842	EIF4A1	8.25332	9.55157	14	31.8721	32.0471	32.005	22.4232	22.4232	22.4232
Q00839	HNRNPU	4.58968	5.3271	15	32.2667	32.3434	32.3473	26.7502	26.7502	27.4757
Q13263	TRIM28	5.45014	5.56879	15	30.9106	30.7517	30.9333	25.3012	25.5428	25.0451
P04406	GAPDH	5.42038	5.64588	15	35.1566	35.0471	35.2931	29.3281	29.7987	29.4323
Q15029	EFTUD2	5.21	6.55745	15	28.9937	28.612	29.3361	22.4232	22.4232	22.4232
P13667	PDIA4	5.3162	6.57125	15	30.321	29.9669	30.6127	23.6658	23.6658	23.8553
Q7KZF4	SND1	7.97889	6.64379	15	29.1052	28.9812	29.1145	22.4232	22.4232	22.4232
P22102	GART	4.3685	7.02295	15	29.87	29.748	28.7203	22.4232	22.4232	22.4232
Q03252	LMNB2	3.61458	7.3518	15	30.547	30.2131	30.3182	22.4232	24.1766	22.4232
P49736	MCM2	7.04935	7.56634	15	30.0625	30.0832	29.8228	22.4232	22.4232	22.4232
P23396	RPS3	4.71213	7.86513	15	31.4864	32.0117	32.1899	23.7714	23.7714	24.5498
P49411	TUFM	4.23884	8.45009	15	31.3995	31.1893	31.4315	23.8238	22.4232	22.4232
Q12906	ILF3	7.77117	9.05407	15	31.4037	31.4191	31.6089	22.4232	22.4232	22.4232
P62258	YWHAE	2.89492	9.71473	15	33.0993	33.4943	33.4083	22.4232	22.4232	26.0114
P07237	P4HB	4.17821	4.09982	16	32.4521	32.1701	32.3936	28.6527	27.8943	28.1694
Q92616	GCN1	4.22156	5.6051	16	27.6917	27.7314	28.6617	22.4232	22.4232	22.4232
P25705	ATP5F1A	3.91097	6.6279	16	33.0761	32.9396	32.6489	25.4317	26.8812	26.468
P49588	AARS1	5.75034	7.22529	16	29.3805	29.6048	29.96	22.4232	22.4232	22.4232
P04075	ALDOA	3.37238	7.47305	16	32.7423	33.0186	32.9562	26.0061	24.0589	26.233
O00567	NOP56	4.92375	7.49556	16	30.2299	29.3556	30.1707	22.4232	22.4232	22.4232
P43243	MATR3	6.76533	7.91955	16	30.5374	30.1869	30.3038	22.4232	22.4232	22.4232
P08243	ASNS	6.05493	8.20082	16	30.3545	30.9102	30.6073	22.4232	22.4232	22.4232
Q15233	NONO	6.4535	8.46096	16	30.9623	30.6272	31.0629	22.4232	22.4232	22.4232
P52272	HNRNPM	3.69372	8.89681	16	31.939	31.8273	32.2179	22.4232	22.4232	24.4475
P60174	TPI1	7.08874	10.6666	16	33.0098	33.3169	32.9427	22.4232	22.4232	22.4232
P15311	EZR	4.5657	7.29472	17	32.6199	32.4149	32.7211	25.9416	24.9651	24.9651
P34932	HSPA4	5.83363	8.3981	17	31.0928	30.463	30.9079	22.4232	22.4232	22.4232
P50991	CCT4	3.85203	2.07631	18	31.8987	31.8993	31.4963	29.763	29.5776	29.7249
P49368	CCT3	7.47143	5.59911	18	31.6437	31.5336	31.55	26.0453	25.9424	25.9424
Q99832	CCT7	6.33301	6.86579	18	31.4044	31.4754	31.3339	24.7529	24.4317	24.4317
P02786	TFRC	5.56422	7.45974	18	29.5508	29.8756	30.2224	22.4232	22.4232	22.4232
P31939	ATIC	5.54343	7.57905	18	29.6556	30.3464	30.0046	22.4232	22.4232	22.4232
P09874	PARP1	8.28426	7.81702	18	30.1575	30.2979	30.2652	22.4232	22.4232	22.4232
P06733	ENO1	4.46267	7.84016	18	34.7553	34.8746	34.9848	26.7816	26.5355	27.7772
P11586	MTHFD1	7.22432	8.01382	18	30.2771	30.5105	30.5234	22.4232	22.4232	22.4232
Q9NR30	DDX21	4.79342	8.08069	18	30.3596	30.022	31.13	22.4232	22.4232	22.4232
Q08211	DHX9	6.50571	8.37761	18	30.9185	30.5478	30.936	22.4232	22.4232	22.4232
P31948	STIP1	6.1041	8.82316	18	31.1716	30.9999	31.5674	22.4232	22.4232	22.4232
P00558	PGK1	3.753	9.52749	18	32.0457	32.923	32.8359	24.3758	22.4232	22.4232
P06576	ATP5F1B	8.53784	11.0929	18	33.4581	33.4702	33.6198	22.4232	22.4232	22.4232
P20700	LMNB1	3.88089	4.79835	19	30.8234	30.3342	30.3772	26.2913	25.3567	25.4917
O75643	SNRNP200	5.37269	6.96429	19	29.7341	29.3944	29.0338	22.4232	22.4232	22.4232
P26640	VARS1	4.61699	7.33418	19	29.1131	30.2006	29.9584	22.4232	22.4232	22.4232
P13010	XRCC5	3.12243	7.80942	19	31.212	30.94	31.0631	24.9405	22.4232	22.4232
Q02952	AKAP12	7.15428	8.06012	19	30.3275	30.6148	30.5075	22.4232	22.4232	22.4232
P22314	UBA1	3.76049	8.61361	19	31.7293	31.6514	31.6401	24.3337	22.4232	22.4232
P07900	HSP90AA1	5.02054	6.81745	20	33.0827	32.9158	32.662	26.4187	25.6943	26.0951
P30101	PDIA3	3.56275	8.72194	20	31.8853	31.695	32.0123	24.5804	22.4232	22.4232
P29401	TKT	6.75834	4.54675	21	31.7566	31.7906	31.6241	27.2033	27.1156	27.2121
P11142	HSPA8	5.50128	6.84038	21	33.8974	34.0673	33.9677	27.2772	26.7842	27.3498
P48643	CCT5	3.85955	8.24364	21	31.1539	31.0804	31.4581	24.1151	22.4232	22.4232
P05783	KRT18	7.923	10.4468	21	32.9898	32.7481	32.8719	22.4232	22.4232	22.4232
P78371	CCT2	3.52348	6.71962	22	32.3643	32.2833	32.3235	26.3793	25.943	24.4899
P46940	IQGAP1	5.39925	7.26478	22	29.4652	30.103	29.4957	22.4232	22.4232	22.4232
Q14152	EIF3A	7.60455	7.36661	22	29.8989	29.6959	29.7745	22.4232	22.4232	22.4232
P05023	ATP1A1	7.27227	7.88378	22	30.1954	30.2718	30.4537	22.4232	22.4232	22.4232
P55072	VCP	6.68669	8.63266	22	31.2757	31.0178	30.874	22.4232	22.4232	22.4232
P38646	HSPA9	5.7125	9.90925	22	32.524	32.639	32.5352	23.1241	22.4232	22.4232
P19338	NCL	6.1117	11.0291	22	33.7454	33.5641	33.0474	22.4232	22.4232	22.4232
P12956	XRCC6	4.058	6.10934	23	31.7287	31.6904	31.8422	26.3988	25.2672	25.2672
P17987	TCP1	4.7644	7.71864	23	31.445	31.5879	31.7849	23.5844	23.5844	24.4931
P07355	ANXA2	7.37806	9.40439	23	34.4083	34.1146	34.2193	24.8412	24.8412	24.8465
P50990	CCT8	5.42726	2.75988	24	32.4335	32.2398	32.2794	29.6553	29.4873	29.5305
O43707	ACTN4	6.52455	5.46497	24	31.6953	31.8524	31.9321	26.4473	26.3188	26.3188
P08238	HSP90AB1	5.31959	6.70044	24	35.0266	34.9063	34.6469	28.3555	28.2944	27.8286
P14625	HSP90B1	5.32521	7.59722	24	32.1835	32.3552	31.8434	24.53	24.824	24.2364
P02545	LMNA	3.40066	8.70209	24	31.8151	32.0504	31.889	22.4232	24.8019	22.4232
P42704	LRPPRC	2.12738	6.68895	25	30.505	30.3434	30.4933	22.4232	22.4232	26.4286
P14618	PKM	6.87799	5.20238	26	34.01	34.1753	34.1901	28.8703	28.9521	28.9459
P11021	HSPA5	7.61891	10.8044	29	33.1754	33.3956	33.1118	22.4232	22.4232	22.4232
P10809	HSPD1	3.78005	7.5935	30	34.2965	34.0348	34.2619	27.0482	27.2529	25.5117
P13639	EEF2	5.05166	5.45558	33	33.8042	33.9677	33.9241	28.3898	28.154	28.7857
Q00610	CLTC	5.98951	7.08462	34	31.8857	31.669	31.6732	24.5329	24.9082	24.5329
P21333	FLNA	9.05646	8.56695	39	30.9503	30.9716	31.0484	22.4232	22.4232	22.4232
P35579	MYH9	4.09106	9.22334	47	32.2336	32.4198	31.9153	22.4232	22.4232	24.0523
P78527	PRKDC	5.15004	5.6691	50	31.0303	31.4352	31.268	25.8372	25.3336	25.5555
P49327	FASN	3.64178	7.32571	51	32.8364	32.7001	32.9643	24.7973	25.0774	26.649
Q09666	AHNAK	4.61814	5.92521	60	31.9086	31.9378	31.8717	25.8487	26.4922	25.6016
Q15149	PLEC	7.3401	8.65663	65	31.223	30.943	31.0734	22.4232	22.4232	22.4232

## Sheet: Table S1c
Table S1c. Identified RBPs from untreated HCT116 cells
Uniprot accession	Gene Symbol	-Log(BH-ajusted P-value）	Log2(Difference)	Unique peptides	Log2(Intensity.L.S1)	Log2(Intensity.L.S2)	Log2(Intensity.L.S3)	Log2(Intensity.H.S1)	Log2(Intensity.H.S2)	Log2(Intensity.H.S3)
P28288	ABCD3	2.72581	1.10573	2	23.2968	23.7518	23.2968	22.3427	22.3427	22.3427
Q9NQG5	RPRD1B	2.63548	1.39303	2	24.1396	23.5339	23.5339	22.3427	22.3427	22.3427
P52306	RAP1GDS1	2.31913	1.54122	2	24.4283	23.6118	23.6118	22.3427	22.3427	22.3427
Q9H8Y8	GORASP2	2.27761	1.82689	2	24.8322	23.8384	23.8384	22.3427	22.3427	22.3427
Q92797	SYMPK	3.06461	1.84521	2	24.6003	23.9818	23.9818	22.3427	22.3427	22.3427
Q9UQE7	SMC3	2.34796	1.8647	2	23.6813	24.7962	24.1448	22.3427	22.3427	22.3427
Q9P0M6	MACROH2A2	2.72045	1.8855	2	24.1829	23.8033	24.6985	22.3427	22.3427	22.3427
P49770	EIF2B2	2.55836	1.9088	2	24.8319	23.9614	23.9614	22.3427	22.3427	22.3427
O95292	VAPB	5.29586	1.91198	2	24.1967	24.1967	24.3708	22.3427	22.3427	22.3427
Q8WVV9	HNRNPLL	6.26468	1.92781	2	24.2371	24.3375	24.2371	22.3427	22.3427	22.3427
Q14008	CKAP5	3.99599	1.99524	2	24.2093	24.2093	24.5953	22.3427	22.3427	22.3427
Q8WW12	PCNP	2.91195	1.99671	2	24.4644	23.8675	24.6865	22.3427	22.3427	22.3427
Q8TED0	UTP15	9.25314	2.07773	2	24.4334	24.414	24.414	22.3427	22.3427	22.3427
P29966	MARCKS	3.60642	2.12532	2	24.3612	24.805	24.238	22.3427	22.3427	22.3427
Q13045	FLII	8.57367	2.14395	2	24.4769	24.4769	24.5064	22.3427	22.3427	22.3427
Q9UNH7	SNX6	2.56655	2.15305	2	25.067	23.9392	24.4812	22.3427	22.3427	22.3427
P09497	CLTB	2.01376	2.17304	2	24.0481	25.4512	24.0481	22.3427	22.3427	22.3427
Q5VTR2	RNF20	2.9035	2.1911	2	25.0733	24.2641	24.2641	22.3427	22.3427	22.3427
P17301	ITGA2	4.8481	2.21738	2	24.473	24.7345	24.473	22.3427	22.3427	22.3427
Q8WX93	PALLD	2.48355	2.22739	2	25.2796	24.2154	24.2154	22.3427	22.3427	22.3427
P48729	CSNK1A1	4.27259	2.26183	2	24.6885	24.3603	24.765	22.3427	22.3427	22.3427
Q6RFH5	WDR74	3.04799	2.30263	2	24.3855	25.165	24.3855	22.3427	22.3427	22.3427
Q96EE3	SEH1L	3.70507	2.30326	2	24.4699	24.9982	24.4699	22.3427	22.3427	22.3427
Q7Z6Z7	HUWE1	6.05482	2.31933	2	24.7528	24.6124	24.621	22.3427	22.3427	22.3427
O94973	AP2A2	5.5563	2.32402	2	24.6061	24.7882	24.6061	22.3427	22.3427	22.3427
Q9NZ01	TECR	4.72261	2.35188	2	24.7015	24.8634	24.5191	22.3427	22.3427	22.3427
O00148	DDX39A	8.41899	2.36453	2	24.6954	24.6954	24.731	22.3427	22.3427	22.3427
Q9BXY0	MAK16	4.14889	2.37287	2	24.5756	24.5756	24.9956	22.3427	22.3427	22.3427
Q13895	BYSL	2.94334	2.4117	2	24.4646	24.4646	25.3341	22.3427	22.3427	22.3427
P55735	SEC13	6.86194	2.43243	2	24.835	24.7452	24.7452	22.3427	22.3427	22.3427
Q6PKG0	LARP1	2.20428	2.4702	2	24.3435	24.3435	25.7519	22.3427	22.3427	22.3427
Q9Y2P8	RCL1	3.58267	2.47432	2	24.6138	25.2236	24.6138	22.3427	22.3427	22.3427
Q16186	ADRM1	3.02472	2.55999	2	24.6098	25.4886	24.6098	22.3427	22.3427	22.3427
O94905	ERLIN2	4.45083	2.62985	2	24.8424	24.8424	25.2329	22.3427	22.3427	22.3427
Q13596	SNX1	4.0199	2.63068	2	24.6409	25.1714	25.1081	22.3427	22.3427	22.3427
Q7Z2W9	MRPL21	2.67691	2.67269	2	24.6378	24.6378	25.7708	22.3427	22.3427	22.3427
Q13418	ILK	3.33994	2.68707	2	24.7751	24.7751	25.5394	22.3427	22.3427	22.3427
Q02818	NUCB1	4.34389	2.69494	2	25.293	24.8026	25.0175	22.3427	22.3427	22.3427
Q9BWJ5	SF3B5	2.28704	2.72162	2	26.0455	24.5738	24.5738	22.3427	22.3427	22.3427
Q07866	KLC1	4.28137	2.7445	2	24.9374	25.387	24.9374	22.3427	22.3427	22.3427
O43678	NDUFA2	4.45817	2.75668	2	24.9636	24.9636	25.3711	22.3427	22.3427	22.3427
O43760	SYNGR2	2.6683	2.77499	2	25.9061	24.7235	24.7235	22.3427	22.3427	22.3427
Q6DKI1	RPL7L1	3.09832	2.79678	2	25.7479	24.7745	24.8962	22.3427	22.3427	22.3427
P46109	CRKL	3.09141	2.81936	2	24.8522	24.8522	25.782	22.3427	22.3427	22.3427
P40937	RFC5	6.75016	2.83141	2	25.137	25.2485	25.137	22.3427	22.3427	22.3427
Q96FV2	SCRN2	6.08496	2.83319	2	25.285	25.1214	25.1214	22.3427	22.3427	22.3427
Q96CS3	FAF2	3.58342	2.83771	2	24.8372	25.6251	25.0791	22.3427	22.3427	22.3427
Q9C005	DPY30	8.58404	2.84142	2	25.1712	25.1712	25.2101	22.3427	22.3427	22.3427
Q86UE4	MTDH	3.37352	2.8563	2	24.8252	25.7125	25.0594	22.3427	22.3427	22.3427
P09110	ACAA1	2.31842	2.87695	2	26.2312	24.802	24.6258	22.3427	22.3427	22.3427
O75937	DNAJC8	4.72509	2.88761	2	25.3425	25.3618	24.9868	22.3427	22.3427	22.3427
P17812	CTPS1	4.22495	2.89	2	25.4147	24.9073	25.3762	22.3427	22.3427	22.3427
Q9NY93	DDX56	7.40184	2.893	2	25.2097	25.2879	25.2097	22.3427	22.3427	22.3427
P51570	GALK1	6.08271	2.9096	2	25.1576	25.3517	25.2477	22.3427	22.3427	22.3427
Q13308	PTK7	4.16424	2.92076	2	24.9473	25.3101	25.5332	22.3427	22.3427	22.3427
P24928	POLR2A	3.60828	2.94707	2	24.8636	25.6883	25.3176	22.3427	22.3427	22.3427
Q9NVS9	PNPO	6.71966	2.94861	2	25.252	25.3701	25.252	22.3427	22.3427	22.3427
Q8NBF2	NHLRC2	2.15498	2.94978	2	26.4501	24.7138	24.7138	22.3427	22.3427	22.3427
Q9BXW7	HDHD5	2.70006	2.96219	2	26.1303	24.8923	24.8923	22.3427	22.3427	22.3427
P15374	UCHL3	2.30213	3.00835	2	26.4118	24.9673	24.6742	22.3427	22.3427	22.3427
Q9UIG0	BAZ1B	2.03203	3.0164	2	24.7177	24.7177	26.642	22.3427	22.3427	22.3427
Q9UN37	VPS4A	10.7217	3.02571	2	25.3644	25.3644	25.3765	22.3427	22.3427	22.3427
Q9Y6M1	IGF2BP2	6.32202	3.0266	2	25.3185	25.471	25.3185	22.3427	22.3427	22.3427
Q92615	LARP4B	4.80251	3.02746	2	25.248	25.248	25.6146	22.3427	22.3427	22.3427
Q9P2R7	SUCLA2	3.4604	3.0279	2	25.9036	25.0669	25.1414	22.3427	22.3427	22.3427
P49903	SEPHS1	2.81931	3.02873	2	24.6795	26.0379	25.3971	22.3427	22.3427	22.3427
Q13740	ALCAM	3.3854	3.05008	2	25.1113	25.1113	25.9558	22.3427	22.3427	22.3427
Q9BUH6	PAXX	3.29453	3.0525	2	25.9899	25.1017	25.0941	22.3427	22.3427	22.3427
Q9UKX7	NUP50	2.50073	3.06522	2	25.4912	24.533	26.1998	22.3427	22.3427	22.3427
O15116	LSM1	4.49882	3.06854	2	25.2636	25.2636	25.7067	22.3427	22.3427	22.3427
Q96CW1	AP2M1	10.2182	3.06976	2	25.4234	25.407	25.407	22.3427	22.3427	22.3427
P57740	NUP107	2.66821	3.07833	2	24.9838	24.9838	26.2957	22.3427	22.3427	22.3427
Q14677	CLINT1	6.1295	3.08646	2	25.545	25.3713	25.3713	22.3427	22.3427	22.3427
Q9Y244	POMP	3.71964	3.08685	2	25.8976	25.1956	25.1956	22.3427	22.3427	22.3427
P35250	RFC2	7.86316	3.09668	2	25.418	25.418	25.4823	22.3427	22.3427	22.3427
P07948	LYN	3.67859	3.0971	2	25.0512	25.3888	25.8796	22.3427	22.3427	22.3427
Q9UBS4	DNAJB11	2.13569	3.09882	2	24.8259	26.6729	24.8259	22.3427	22.3427	22.3427
Q96A35	MRPL24	4.32497	3.12222	2	25.2987	25.7974	25.2987	22.3427	22.3427	22.3427
Q9Y5L4	TIMM13	5.09509	3.13692	2	25.3727	25.3727	25.6935	22.3427	22.3427	22.3427
Q8WWH5	TRUB1	4.39769	3.1474	2	25.3295	25.8115	25.3295	22.3427	22.3427	22.3427
Q9H223	EHD4	3.9741	3.15628	2	25.2929	25.2929	25.9113	22.3427	22.3427	22.3427
Q93009	USP7	7.05055	3.15906	2	25.4669	25.5715	25.4669	22.3427	22.3427	22.3427
Q9NX40	OCIAD1	4.14496	3.16227	2	25.3181	25.8789	25.3181	22.3427	22.3427	22.3427
P48163	ME1	2.00536	3.16237	2	24.8207	24.8207	26.874	22.3427	22.3427	22.3427
Q8NI27	THOC2	3.30523	3.16483	2	25.3016	25.1109	26.1102	22.3427	22.3427	22.3427
O96019	ACTL6A	2.82318	3.21889	2	24.8348	25.5744	26.2757	22.3427	22.3427	22.3427
P36873	PPP1CC	2.08216	3.22051	2	24.9007	24.9007	26.8884	22.3427	22.3427	22.3427
Q9H3K2	GHITM	7.12227	3.23866	2	25.65	25.5471	25.5471	22.3427	22.3427	22.3427
P49247	RPIA	3.14377	3.2541	2	25.2278	25.273	26.2898	22.3427	22.3427	22.3427
Q15061	WDR43	3.68035	3.25441	2	25.3447	25.3447	26.102	22.3427	22.3427	22.3427
O94919	ENDOD1	2.79967	3.25945	2	25.1749	26.4568	25.1749	22.3427	22.3427	22.3427
P53985	SLC16A1	2.41912	3.26672	2	25.2143	24.9336	26.6806	22.3427	22.3427	22.3427
Q9HD42	CHMP1A	2.01923	3.28193	2	26.7866	24.3556	25.7319	22.3427	22.3427	22.3427
Q9BQ67	GRWD1	3.42854	3.28282	2	25.3176	26.2161	25.343	22.3427	22.3427	22.3427
Q9H1K4	SLC25A18	8.15081	3.29174	2	25.6152	25.6152	25.6731	22.3427	22.3427	22.3427
Q14651	PLS1	3.02761	3.30083	2	26.3572	25.0757	25.4978	22.3427	22.3427	22.3427
Q9NXG2	THUMPD1	4.9942	3.32695	2	25.4626	25.879	25.6675	22.3427	22.3427	22.3427
Q9H074	PAIP1	3.46706	3.33298	2	26.2592	25.3348	25.4331	22.3427	22.3427	22.3427
P62306	SNRPF	4.21957	3.33635	2	25.3595	26.0133	25.6645	22.3427	22.3427	22.3427
P11908	PRPS2	4.82469	3.33637	2	25.945	25.5462	25.5462	22.3427	22.3427	22.3427
P46379	BAG6	2.55151	3.35323	2	26.5427	25.771	24.7741	22.3427	22.3427	22.3427
Q92621	NUP205	4.80485	3.38148	2	25.4918	25.7171	25.9638	22.3427	22.3427	22.3427
P05026	ATP1B1	3.49767	3.38956	2	25.3903	26.3149	25.4918	22.3427	22.3427	22.3427
P23229	ITGA6	6.70284	3.39935	2	25.8338	25.6962	25.6962	22.3427	22.3427	22.3427
O00743	PPP6C	4.19131	3.39967	2	26.1337	25.5468	25.5468	22.3427	22.3427	22.3427
Q13564	NAE1	2.8592	3.42832	2	25.8932	24.9667	26.4533	22.3427	22.3427	22.3427
Q8NFV4	ABHD11	2.84177	3.43361	2	25.3376	26.6539	25.3376	22.3427	22.3427	22.3427
P07686	HEXB	3.84572	3.44527	2	25.315	26.1177	25.9314	22.3427	22.3427	22.3427
Q8IV08	PLD3	6.01171	3.44577	2	25.7193	25.9269	25.7193	22.3427	22.3427	22.3427
Q5T8P6	RBM26	3.49629	3.45429	2	26.2729	25.8716	25.2466	22.3427	22.3427	22.3427
Q09161	NCBP1	2.47922	3.4641	2	24.7005	26.3678	26.3522	22.3427	22.3427	22.3427
Q9UKV3	ACIN1	2.66292	3.47658	2	25.1292	26.7803	25.5484	22.3427	22.3427	22.3427
Q13601	KRR1	2.74614	3.48032	2	26.7659	25.3517	25.3517	22.3427	22.3427	22.3427
Q9UKF6	CPSF3	3.17679	3.4964	2	25.6133	25.3504	26.5538	22.3427	22.3427	22.3427
Q02978	SLC25A11	2.3922	3.52083	2	24.8095	25.917	26.8642	22.3427	22.3427	22.3427
Q9BVJ6	UTP14A	5.03475	3.52614	2	26.0755	25.6454	25.8858	22.3427	22.3427	22.3427
O60869	EDF1	2.89023	3.53067	2	26.7242	25.2663	25.6297	22.3427	22.3427	22.3427
P05165	PCCA	4.33045	3.53374	2	26.0862	25.5023	26.0409	22.3427	22.3427	22.3427
P52434	POLR2H	3.86811	3.54198	2	25.6271	25.6503	26.3768	22.3427	22.3427	22.3427
Q9ULA0	DNPEP	5.26113	3.54635	2	26.1087	25.7793	25.7793	22.3427	22.3427	22.3427
Q9H7Z7	PTGES2	3.62949	3.57847	2	25.6352	25.6352	26.4932	22.3427	22.3427	22.3427
P31350	RRM2	4.70764	3.58243	2	25.7724	26.2307	25.7724	22.3427	22.3427	22.3427
Q9BTV4	TMEM43	6.1556	3.58795	2	25.9473	25.8084	26.0364	22.3427	22.3427	22.3427
P30740	SERPINB1	2.82147	3.59005	2	25.1593	26.765	25.8742	22.3427	22.3427	22.3427
Q02218	OGDH	3.2855	3.59369	2	26.4303	25.2552	26.1239	22.3427	22.3427	22.3427
P14406	COX7A2	6.14438	3.6141	2	29.2119	29.2254	29.0185	25.5304	25.5304	25.5526
O60493	SNX3	3.25745	3.63496	2	26.7016	25.6158	25.6158	22.3427	22.3427	22.3427
P40616	ARL1	9.7259	3.64426	2	26.0042	25.9784	25.9784	22.3427	22.3427	22.3427
P54578	USP14	4.57413	3.64599	2	26.3247	25.8208	25.8208	22.3427	22.3427	22.3427
P00918	CA2	2.97571	3.64971	2	25.9183	26.7718	25.2874	22.3427	22.3427	22.3427
P04179	SOD2	2.90127	3.65196	2	25.5336	25.5556	26.8949	22.3427	22.3427	22.3427
Q16718	NDUFA5	2.3556	3.66865	2	27.2776	25.3783	25.3783	22.3427	22.3427	22.3427
Q9H4M9	EHD1	4.49288	3.67886	2	26.3704	25.9061	25.7883	22.3427	22.3427	22.3427
P11172	UMPS	3.14472	3.68908	2	25.7421	26.8092	25.5442	22.3427	22.3427	22.3427
P48637	GSS	4.33067	3.69164	2	26.4262	25.8385	25.8385	22.3427	22.3427	22.3427
P28290	ITPRID2	4.04402	3.70173	2	26.4987	25.7342	25.9005	22.3427	22.3427	22.3427
Q14137	BOP1	4.80234	3.70329	2	26.3451	25.8966	25.8966	22.3427	22.3427	22.3427
Q8TDN6	BRIX1	2.34346	3.74461	2	27.3898	25.4362	25.4362	22.3427	22.3427	22.3427
Q8WWM7	ATXN2L	2.81855	3.75388	2	26.7231	26.4281	25.1386	22.3427	22.3427	22.3427
P30536	TSPO	2.97331	3.75718	2	26.747	25.2512	26.3016	22.3427	22.3427	22.3427
Q99829	CPNE1	4.93797	3.7857	2	26.2892	26.2494	25.8468	22.3427	22.3427	22.3427
P82650	MRPS22	2.84018	3.80307	2	26.4462	25.1942	26.797	22.3427	22.3427	22.3427
P12955	PEPD	5.1202	3.81801	2	26.011	26.416	26.0554	22.3427	22.3427	22.3427
P30566	ADSL	3.76765	3.81983	2	25.8811	25.8811	26.7256	22.3427	22.3427	22.3427
Q9UGI8	TES	4.21643	3.82881	2	26.6058	25.9544	25.9544	22.3427	22.3427	22.3427
Q92979	EMG1	6.34436	3.83517	2	26.3051	26.1143	26.1143	22.3427	22.3427	22.3427
P83916	CBX1	2.02428	3.83749	2	26.8601	24.5475	27.1332	22.3427	22.3427	22.3427
P24539	ATP5PB	3.95745	3.85588	2	26.1802	26.648	25.7677	22.3427	22.3427	22.3427
Q8TB61	SLC35B2	5.34945	3.87986	2	26.1261	26.0916	26.4501	22.3427	22.3427	22.3427
O14579	COPE	3.35514	3.88857	2	25.5007	26.5841	26.6092	22.3427	22.3427	22.3427
P19404	NDUFV2	2.79789	3.90523	2	25.7355	25.7355	27.273	22.3427	22.3427	22.3427
Q15417	CNN3	3.20997	3.91472	2	26.5968	26.7171	25.4585	22.3427	22.3427	22.3427
P30837	ALDH1B1	2.99512	3.92863	2	25.8923	27.1823	25.7395	22.3427	22.3427	22.3427
O75348	ATP6V1G1	3.80104	3.9367	2	25.7119	26.598	26.5284	22.3427	22.3427	22.3427
Q92530	PSMF1	2.94743	3.93941	2	27.1968	26.029	25.6208	22.3427	22.3427	22.3427
Q52LJ0	FAM98B	2.99683	3.9528	2	25.3807	26.8366	26.6693	22.3427	22.3427	22.3427
P07305	H1-0	2.8354	3.96992	2	25.9036	25.7094	27.325	22.3427	22.3427	22.3427
Q9Y6M9	NDUFB9	6.11004	3.98397	2	26.1804	26.4328	26.3669	22.3427	22.3427	22.3427
O60502	OGA	2.78456	3.98835	2	25.8034	27.3865	25.8034	22.3427	22.3427	22.3427
Q6YN16	HSDL2	4.05222	4.00805	2	26.2898	25.9513	26.8113	22.3427	22.3427	22.3427
Q9BTE3	MCMBP	4.18812	4.02389	2	26.8306	26.1347	26.1347	22.3427	22.3427	22.3427
Q9NP97	DYNLRB1	5.48072	4.04491	2	26.2187	26.5951	26.3493	22.3427	22.3427	22.3427
Q00169	PITPNA	3.95517	4.05104	2	26.1827	26.0736	26.9251	22.3427	22.3427	22.3427
Q9BZF1	OSBPL8	7.2803	4.05342	2	26.4601	26.4034	26.3249	22.3427	22.3427	22.3427
Q96IX5	ATP5MK	4.12434	4.05703	2	26.8158	26.4085	25.975	22.3427	22.3427	22.3427
Q9UDW1	UQCR10	3.1066	4.06472	2	25.526	26.7735	26.9229	22.3427	22.3427	22.3427
O95336	PGLS	4.0206	4.08039	2	26.3295	26.9118	26.0281	22.3427	22.3427	22.3427
P54725	RAD23A	8.49464	4.09415	2	26.4172	26.4763	26.4172	22.3427	22.3427	22.3427
Q96S97	MYADM	6.69202	4.10313	2	26.369	26.5541	26.4145	22.3427	22.3427	22.3427
Q9Y3B9	RRP15	2.70064	4.11418	2	25.884	25.884	27.6029	22.3427	22.3427	22.3427
P17480	UBTF	5.74665	4.13032	2	26.3303	26.4316	26.6573	22.3427	22.3427	22.3427
O00422	SAP18	3.443	4.14991	2	27.203	26.3182	25.9568	22.3427	22.3427	22.3427
P12532	CKMT1A	5.56128	4.15808	2	26.3926	26.3926	26.7174	22.3427	22.3427	22.3427
E9PRG8	C11orf98	6.10359	4.16108	2	26.6623	26.4246	26.4246	22.3427	22.3427	22.3427
Q96A26	FAM162A	3.11242	4.1738	2	27.3656	26.3665	25.8176	22.3427	22.3427	22.3427
Q01081	U2AF1	5.00309	4.19004	2	26.3822	26.834	26.3822	22.3427	22.3427	22.3427
O76031	CLPX	3.58252	4.20294	2	25.9518	26.5373	27.1479	22.3427	22.3427	22.3427
P61106	RAB14	5.05182	4.26055	2	26.3395	26.8548	26.6155	22.3427	22.3427	22.3427
P19623	SRM	3.56389	4.27831	2	26.0853	26.4844	27.2934	22.3427	22.3427	22.3427
Q14116	IL18	4.48781	4.28159	2	27.0379	26.4453	26.3898	22.3427	22.3427	22.3427
Q92572	AP3S1	4.99084	4.29563	2	26.4829	26.9494	26.4829	22.3427	22.3427	22.3427
Q9NZ45	CISD1	4.19228	4.30425	2	26.3366	26.4682	27.1362	22.3427	22.3427	22.3427
P56545	CTBP2	4.1164	4.30722	2	26.5706	26.2465	27.1328	22.3427	22.3427	22.3427
Q15363	TMED2	5.39627	4.32028	2	26.7038	26.4312	26.854	22.3427	22.3427	22.3427
P63098	PPP3R1	4.76092	4.32053	2	26.3472	26.9657	26.6769	22.3427	22.3427	22.3427
Q15427	SF3B4	5.28759	4.32821	2	26.4078	26.8201	26.7851	22.3427	22.3427	22.3427
Q9UBQ5	EIF3K	3.99318	4.34182	2	27.2455	26.4041	26.4041	22.3427	22.3427	22.3427
Q99733	NAP1L4	2.80573	4.35138	2	25.7454	27.7107	26.6263	22.3427	22.3427	22.3427
Q16576	RBBP7	7.08676	4.40219	2	26.8201	26.6568	26.758	22.3427	22.3427	22.3427
P62273	RPS29	7.75467	4.40345	2	26.7208	26.7073	26.8105	22.3427	22.3427	22.3427
P10620	MGST1	4.81937	4.44278	2	26.9351	26.9898	26.4318	22.3427	22.3427	22.3427
P04350	TUBB4A	4.83362	4.52236	2	26.6506	27.2212	26.7235	22.3427	22.3427	22.3427
Q96CT7	CCDC124	4.06449	4.55509	2	26.3908	27.3661	26.9366	22.3427	22.3427	22.3427
O75438	NDUFB1	4.52541	4.55518	2	26.682	26.682	27.3297	22.3427	22.3427	22.3427
O75940	SMNDC1	9.75556	4.56892	2	26.901	26.9329	26.901	22.3427	22.3427	22.3427
P47813	EIF1AX	5.08177	4.59671	2	27.1721	27.0081	26.6382	22.3427	22.3427	22.3427
Q05519	SRSF11	3.75963	4.6075	2	27.3152	27.2671	26.2685	22.3427	22.3427	22.3427
O15173	PGRMC2	9.12245	4.67604	2	27.0501	27.0024	27.0039	22.3427	22.3427	22.3427
Q96FJ2	DYNLL2	3.96929	4.73227	2	27.3822	26.4551	27.3877	22.3427	22.3427	22.3427
P55769	SNU13	3.42662	4.75017	2	26.5774	27.9422	26.7591	22.3427	22.3427	22.3427
Q92734	TFG	5.83443	4.75849	2	26.9954	26.9954	27.3129	22.3427	22.3427	22.3427
P68366	TUBA4A	3.83628	4.76498	2	27.5461	27.3326	26.4444	22.3427	22.3427	22.3427
P43307	SSR1	2.26545	4.77493	2	25.3813	28.1376	27.8342	22.3427	22.3427	22.3427
P28072	PSMB6	5.63322	4.77979	2	27.3613	26.9978	27.0086	22.3427	22.3427	22.3427
P48556	PSMD8	3.71197	4.85546	2	27.7855	27.2936	26.5155	22.3427	22.3427	22.3427
P63279	UBE2I	5.37261	4.86476	2	27.4779	27.1431	27.0015	22.3427	22.3427	22.3427
P28070	PSMB4	4.53646	4.89298	2	27.3454	27.5686	26.7933	22.3427	22.3427	22.3427
Q9Y333	LSM2	4.21691	4.91706	2	26.9678	26.9944	27.8171	22.3427	22.3427	22.3427
Q9NX55	HYPK	3.67648	4.9272	2	26.7154	27.0894	28.005	22.3427	22.3427	22.3427
Q96HS1	PGAM5	5.11738	4.95623	2	27.6325	27.1322	27.1322	22.3427	22.3427	22.3427
Q9Y3B4	SF3B6	4.84604	4.96301	2	27.1354	27.0865	27.6954	22.3427	22.3427	22.3427
P47985	UQCRFS1	3.5702	4.96365	2	28.1279	26.8956	26.8956	22.3427	22.3427	22.3427
P06703	S100A6	2.73308	4.97705	2	29.2287	31.0927	31.3593	25.4711	25.4711	25.8072
P05161	ISG15	3.92026	4.9832	2	27.5865	27.7319	26.6595	22.3427	22.3427	22.3427
O15212	PFDN6	6.3551	5.09106	2	27.3499	27.3499	27.6016	22.3427	22.3427	22.3427
P47914	RPL29	4.20329	5.10122	2	26.8623	27.7694	27.7002	22.3427	22.3427	22.3427
Q15836	VAMP3	9.57938	5.11826	2	27.4443	27.487	27.4518	22.3427	22.3427	22.3427
Q07666	KHDRBS1	3.65874	5.14799	2	27.8929	27.8974	26.6819	22.3427	22.3427	22.3427
P09234	SNRPC	3.45444	5.25278	2	27.8653	28.2322	26.6891	22.3427	22.3427	22.3427
Q12907	LMAN2	5.985	5.30795	2	27.8672	27.5424	27.5424	22.3427	22.3427	22.3427
Q01844	EWSR1	5.4474	5.31764	2	27.4649	27.9503	27.5659	22.3427	22.3427	22.3427
P55010	EIF5	5.13524	5.34178	2	27.8241	27.8982	27.3313	22.3427	22.3427	22.3427
P08574	CYC1	2.82096	5.42411	2	29.0004	27.7307	26.5696	22.3427	22.3427	22.3427
P62314	SNRPD1	3.18285	5.66043	2	29.1773	27.329	27.5032	22.3427	22.3427	22.3427
Q15843	NEDD8	5.56977	5.67823	2	27.9442	28.3054	27.8134	22.3427	22.3427	22.3427
P00441	SOD1	3.869	5.70713	2	27.9631	27.4109	28.7756	22.3427	22.3427	22.3427
Q9NR31	SAR1A	5.76652	5.77519	2	27.8681	28.325	28.1607	22.3427	22.3427	22.3427
P60866	RPS20	3.57017	5.78602	2	30.8115	30.6617	30.5229	24.4078	24.4078	25.8224
P62328	TMSB4X	6.03927	5.92108	2	28.2674	28.0594	28.4647	22.3427	22.3427	22.3427
Q9BQE3	TUBA1C	4.65088	6.01008	2	28.8596	27.9659	28.233	22.3427	22.3427	22.3427
P30049	ATP5F1D	3.2091	6.02831	2	28.8938	27.1401	29.0792	22.3427	22.3427	22.3427
P58546	MTPN	5.18653	6.15072	2	28.6118	28.1055	28.7631	22.3427	22.3427	22.3427
P56385	ATP5ME	7.67993	6.20253	2	28.4976	28.4976	28.6406	22.3427	22.3427	22.3427
O75531	BANF1	2.40713	6.222	2	29.6001	29.6083	26.4858	22.3427	22.3427	22.3427
Q15847	ADIRF	3.8416	6.25353	2	28.5099	27.8788	29.4002	22.3427	22.3427	22.3427
P62857	RPS28	5.63198	6.32706	2	28.6691	28.3962	28.9441	22.3427	22.3427	22.3427
Q16878	CDO1	5.02739	6.33884	2	29.1309	28.4569	28.4569	22.3427	22.3427	22.3427
P20674	COX5A	6.58119	6.43498	2	28.6352	28.9527	28.7453	22.3427	22.3427	22.3427
P84103	SRSF3	6.81421	6.49301	2	28.7373	28.7711	28.9988	22.3427	22.3427	22.3427
P62942	FKBP1A	5.39635	6.60282	2	29.1572	28.5683	29.1112	22.3427	22.3427	22.3427
P62847	RPS24	4.05095	6.67902	2	28.1902	29.4951	29.3799	22.3427	22.3427	22.3427
P60903	S100A10	3.8948	6.7615	2	29.6475	29.4812	28.1841	22.3427	22.3427	22.3427
P49207	RPL34	11.5651	6.95969	2	29.3139	29.2967	29.2967	22.3427	22.3427	22.3427
Q01130	SRSF2	7.75445	7.08757	2	29.5183	29.435	29.3377	22.3427	22.3427	22.3427
P61224	RAP1B	5.47453	7.13461	2	29.8568	29.2072	29.368	22.3427	22.3427	22.3427
P05386	RPLP1	2.59564	7.18914	2	30.512	30.6854	27.3983	22.3427	22.3427	22.3427
P46778	RPL21	5.25702	7.20845	2	29.2072	29.4754	29.971	22.3427	22.3427	22.3427
P42677	RPS27	7.19572	7.45838	2	29.7576	29.6973	29.9485	22.3427	22.3427	22.3427
Q3ZCM7	TUBB8	6.15634	7.48647	2	29.59	29.8284	30.0692	22.3427	22.3427	22.3427
P62304	SNRPE	7.99259	7.5221	2	29.7705	29.8945	29.9296	22.3427	22.3427	22.3427
P61254	RPL26	5.00991	7.69759	2	30.3448	30.286	29.4902	22.3427	22.3427	22.3427
Q99880	H2BC13	2.49295	9.24987	2	33.9591	33.4458	35.0471	23.5145	23.5145	27.6734
Q16778	H2BC21	12.8816	9.70513	2	32.0543	32.0414	32.0479	22.3427	22.3427	22.3427
P16403	H1-2	5.16659	10.7414	2	32.8487	32.6286	33.7751	22.3427	22.3427	22.3427
Q15437	SEC23B	4.36327	1.65916	3	23.9155	23.9155	24.1747	22.3427	22.3427	22.3427
Q8WVM8	SCFD1	3.12037	1.95957	3	23.9756	24.2324	24.699	22.3427	22.3427	22.3427
Q9BYN0	SRXN1	4.75492	1.99158	3	24.2517	24.4996	24.2517	22.3427	22.3427	22.3427
P30876	POLR2B	3.89673	2.04376	3	24.1468	24.3822	24.6305	22.3427	22.3427	22.3427
P37235	HPCAL1	3.6114	2.09496	3	24.7762	24.2685	24.2685	22.3427	22.3427	22.3427
Q14692	BMS1	2.36352	2.20233	3	24.1669	24.1669	25.3014	22.3427	22.3427	22.3427
P10155	RO60	3.18534	2.27976	3	24.3855	25.0964	24.3855	22.3427	22.3427	22.3427
Q86YP4	GATAD2A	2.35469	2.3008	3	24.0266	25.3856	24.5185	22.3427	22.3427	22.3427
P18031	PTPN1	4.98287	2.40473	3	24.66	24.9224	24.66	22.3427	22.3427	22.3427
Q9NQT4	EXOSC5	4.94851	2.53033	3	25.0608	24.7792	24.7792	22.3427	22.3427	22.3427
Q9H444	CHMP4B	2.43437	2.5928	3	25.7793	24.4135	24.6139	22.3427	22.3427	22.3427
Q5JTH9	RRP12	3.5564	2.62569	3	24.894	25.3796	24.6317	22.3427	22.3427	22.3427
Q8NI36	WDR36	3.10675	2.67972	3	25.6063	24.7306	24.7306	22.3427	22.3427	22.3427
Q16851	UGP2	3.4609	2.82619	3	25.6679	24.9195	24.9195	22.3427	22.3427	22.3427
Q9BTE6	AARSD1	3.29279	2.8266	3	24.8331	24.9592	25.7157	22.3427	22.3427	22.3427
P52788	SMS	5.12349	2.8635	3	25.3983	25.1102	25.1102	22.3427	22.3427	22.3427
P51610	HCFC1	5.13733	2.89639	3	25.4313	25.1554	25.1307	22.3427	22.3427	22.3427
O43837	IDH3B	2.16361	2.91437	3	26.3927	24.7432	24.6354	22.3427	22.3427	22.3427
O95453	PARN	2.45656	2.9729	3	24.9289	24.7452	26.2728	22.3427	22.3427	22.3427
Q15125	EBP	5.82692	2.9798	3	25.4557	25.256	25.256	22.3427	22.3427	22.3427
Q6NXG1	ESRP1	3.91025	3.03341	3	25.1705	25.7875	25.1705	22.3427	22.3427	22.3427
O15258	RER1	3.74958	3.07064	3	25.1847	25.1847	25.8708	22.3427	22.3427	22.3427
Q92520	FAM3C	2.61852	3.07745	3	26.0583	24.5496	25.6526	22.3427	22.3427	22.3427
P78406	RAE1	3.46626	3.08108	3	25.0075	25.3312	25.9328	22.3427	22.3427	22.3427
Q9H845	ACAD9	3.54852	3.108	3	25.1902	25.9718	25.1902	22.3427	22.3427	22.3427
Q9Y4W6	AFG3L2	3.09692	3.11593	3	25.7051	24.7839	25.887	22.3427	22.3427	22.3427
P15170	GSPT1	2.31176	3.13451	3	25.0358	26.5822	24.8138	22.3427	22.3427	22.3427
Q8IX12	CCAR1	3.43215	3.13702	3	26.043	25.1981	25.1981	22.3427	22.3427	22.3427
P51648	ALDH3A2	2.79375	3.168	3	25.0939	26.3444	25.0939	22.3427	22.3427	22.3427
Q13011	ECH1	3.24579	3.17761	3	25.3092	25.1053	26.1466	22.3427	22.3427	22.3427
Q15397	PUM3	3.8752	3.17775	3	25.9451	25.2091	25.4073	22.3427	22.3427	22.3427
P07858	CTSB	3.52699	3.19406	3	25.4147	25.1403	26.0554	22.3427	22.3427	22.3427
Q13242	SRSF9	4.10471	3.20316	3	25.9336	25.352	25.352	22.3427	22.3427	22.3427
Q6DKJ4	NXN	4.51022	3.21966	3	25.8703	25.4085	25.4085	22.3427	22.3427	22.3427
P35237	SERPINB6	5.7518	3.22539	3	25.4929	25.4929	25.7186	22.3427	22.3427	22.3427
Q9NUU7	DDX19A	3.54996	3.30657	3	25.433	26.199	25.3159	22.3427	22.3427	22.3427
Q99720	SIGMAR1	3.36845	3.30818	3	25.3425	25.3425	26.2677	22.3427	22.3427	22.3427
Q99627	COPS8	5.30218	3.35284	3	25.5942	25.5942	25.8984	22.3427	22.3427	22.3427
O60684	KPNA6	3.71053	3.36147	3	26.2166	25.4481	25.4481	22.3427	22.3427	22.3427
Q16822	PCK2	3.5926	3.36502	3	25.2916	25.6049	26.2268	22.3427	22.3427	22.3427
Q14683	SMC1A	5.84037	3.36909	3	25.6372	25.8612	25.6372	22.3427	22.3427	22.3427
Q99598	TSNAX	3.1665	3.36984	3	26.4198	25.3221	25.3959	22.3427	22.3427	22.3427
Q96E11	MRRF	2.57896	3.39261	3	25.2262	25.2262	26.7538	22.3427	22.3427	22.3427
Q9Y3B3	TMED7	3.19188	3.4456	3	26.5019	25.4316	25.4316	22.3427	22.3427	22.3427
Q9BQA1	WDR77	2.39708	3.46051	3	25.0554	25.4052	26.9492	22.3427	22.3427	22.3427
Q9Y512	SAMM50	2.66835	3.47197	3	26.6269	25.8935	24.9238	22.3427	22.3427	22.3427
P30084	ECHS1	8.08819	3.49467	3	25.8799	25.8162	25.8162	22.3427	22.3427	22.3427
P30085	CMPK1	3.08147	3.53004	3	25.4824	26.6536	25.4824	22.3427	22.3427	22.3427
P01116	KRAS	2.56672	3.54153	3	25.3487	26.9555	25.3487	22.3427	22.3427	22.3427
P21283	ATP6V1C1	4.89813	3.55048	3	26.1146	25.9182	25.6469	22.3427	22.3427	22.3427
Q8N684	CPSF7	4.06565	3.56081	3	25.6831	25.6831	26.3445	22.3427	22.3427	22.3427
Q9NY33	DPP3	3.54627	3.61147	3	26.5605	25.6511	25.6511	22.3427	22.3427	22.3427
P80303	NUCB2	2.89675	3.63138	3	25.3115	25.781	26.8299	22.3427	22.3427	22.3427
P26358	DNMT1	3.12722	3.63803	3	25.8125	26.7272	25.4027	22.3427	22.3427	22.3427
P84085	ARF5	6.11625	3.65175	3	25.9255	26.1326	25.9255	22.3427	22.3427	22.3427
O60749	SNX2	2.04642	3.65648	3	26.3237	24.533	27.141	22.3427	22.3427	22.3427
Q99459	CDC5L	2.90167	3.6767	3	26.3279	26.6031	25.1273	22.3427	22.3427	22.3427
Q16762	TST	6.67407	3.69922	3	26.1224	25.9482	26.0552	22.3427	22.3427	22.3427
Q12792	TWF1	5.20826	3.70177	3	26.0057	25.862	26.2658	22.3427	22.3427	22.3427
P22570	FDXR	2.95792	3.70291	3	25.5581	25.6528	26.9261	22.3427	22.3427	22.3427
Q13428	TCOF1	2.53044	3.72907	3	27.0731	26.0674	25.075	22.3427	22.3427	22.3427
Q07960	ARHGAP1	4.18242	3.73186	3	26.3963	26.1631	25.6644	22.3427	22.3427	22.3427
Q13247	SRSF6	2.50359	3.73729	3	25.2697	25.7477	27.2228	22.3427	22.3427	22.3427
P27144	AK4	3.52916	3.74448	3	25.6566	26.7066	25.8984	22.3427	22.3427	22.3427
P63151	PPP2R2A	6.82753	3.74571	3	26.1825	26.0415	26.0415	22.3427	22.3427	22.3427
Q13620	CUL4B	3.44544	3.75296	3	25.509	26.1115	26.6667	22.3427	22.3427	22.3427
O76094	SRP72	3.06534	3.75729	3	25.6805	25.6805	26.9392	22.3427	22.3427	22.3427
P18859	ATP5PF	2.64248	3.78456	3	27.2197	25.5811	25.5811	22.3427	22.3427	22.3427
Q92890	UFD1	3.09044	3.7982	3	26.4432	25.3151	26.6645	22.3427	22.3427	22.3427
P37198	NUP62	2.5654	3.81096	3	25.5436	27.3067	25.6108	22.3427	22.3427	22.3427
P63096	GNAI1	8.54279	3.83619	3	26.2148	26.161	26.161	22.3427	22.3427	22.3427
Q9NY12	GAR1	3.19577	3.83864	3	25.7849	25.7849	26.9744	22.3427	22.3427	22.3427
Q96DB5	RMDN1	2.75581	3.8485	3	26.6938	25.155	26.7249	22.3427	22.3427	22.3427
O95456	PSMG1	2.41287	3.85363	3	26.0792	26.1323	27.5953	23.5603	22.3427	22.3427
Q96I25	RBM17	5.39938	3.85492	3	26.0875	26.0875	26.4181	22.3427	22.3427	22.3427
P29317	EPHA2	7.29814	3.8838	3	26.1894	26.1894	26.3009	22.3427	22.3427	22.3427
Q15005	SPCS2	7.15109	3.89803	3	26.2002	26.2002	26.322	22.3427	22.3427	22.3427
P21399	ACO1	4.50056	3.90134	3	25.8842	26.3322	26.5158	22.3427	22.3427	22.3427
Q9NP72	RAB18	4.12135	3.90574	3	26.5556	25.7889	26.4011	22.3427	22.3427	22.3427
Q9Y224	RTRAF	3.33729	3.924	3	25.6191	26.9099	26.2713	22.3427	22.3427	22.3427
Q9Y3Y2	CHTOP	2.72242	3.92566	3	25.5808	25.8922	27.3323	22.3427	22.3427	22.3427
O95793	STAU1	3.0551	3.95388	3	27.1828	25.7978	25.9093	22.3427	22.3427	22.3427
Q13557	CAMK2D	7.06935	3.95576	3	26.2553	26.2553	26.3849	22.3427	22.3427	22.3427
P35080	PFN2	4.93552	3.96471	3	26.3558	26.5365	26.0301	22.3427	22.3427	22.3427
Q99986	VRK1	4.16827	3.96542	3	25.8586	26.4388	26.6272	22.3427	22.3427	22.3427
O75607	NPM3	2.61046	3.9719	3	25.1929	26.5896	27.1614	22.3427	22.3427	22.3427
O95782	AP2A1	3.07319	3.99255	3	26.3494	25.5597	27.0968	22.3427	22.3427	22.3427
Q86U42	PABPN1	5.57153	3.99655	3	26.5462	26.2358	26.2358	22.3427	22.3427	22.3427
O76003	GLRX3	3.35579	4.00058	3	25.9676	25.9676	27.0949	22.3427	22.3427	22.3427
P36405	ARL3	5.8691	4.00645	3	26.5239	26.2618	26.2618	22.3427	22.3427	22.3427
Q14257	RCN2	3.26435	4.07533	3	25.8687	26.1793	27.2062	22.3427	22.3427	22.3427
Q9Y4Z0	LSM4	3.06052	4.10338	3	25.8315	27.3453	26.1616	22.3427	22.3427	22.3427
P00568	AK1	3.74598	4.11616	3	27.0701	26.0986	26.208	22.3427	22.3427	22.3427
O14949	UQCRQ	4.83428	4.14851	3	26.6814	26.1639	26.6285	22.3427	22.3427	22.3427
P45973	CBX5	3.32321	4.18861	3	26.1303	26.1303	27.3336	22.3427	22.3427	22.3427
P48739	PITPNB	3.80185	4.20172	3	27.1317	26.3838	26.1178	22.3427	22.3427	22.3427
P61011	SRP54	2.35224	4.21349	3	27.5371	25.1323	26.9993	22.3427	22.3427	22.3427
O95232	LUC7L3	8.77757	4.25437	3	26.5798	26.5798	26.6319	22.3427	22.3427	22.3427
Q969H8	MYDGF	4.47026	4.26202	3	26.3962	26.3962	27.0219	22.3427	22.3427	22.3427
P55145	MANF	3.21568	4.26933	3	25.8686	27.3778	26.5898	22.3427	22.3427	22.3427
O14617	AP3D1	6.90621	4.27124	3	26.5628	26.5628	26.7165	22.3427	22.3427	22.3427
P23193	TCEA1	3.30913	4.27141	3	27.2494	26.7523	25.8408	22.3427	22.3427	22.3427
P61160	ACTR2	4.4135	4.27324	3	26.3999	26.3999	27.0482	22.3427	22.3427	22.3427
Q9P0J1	PDP1	4.27233	4.2737	3	27.0857	26.3818	26.3818	22.3427	22.3427	22.3427
Q06203	PPAT	3.6251	4.29389	3	26.741	27.1735	25.9954	22.3427	22.3427	22.3427
Q5JTV8	TOR1AIP1	3.22958	4.31395	3	26.8182	25.8325	27.3193	22.3427	22.3427	22.3427
Q1KMD3	HNRNPUL2	2.84495	4.31508	3	26.7651	27.5529	25.6555	22.3427	22.3427	22.3427
P82979	SARNP	3.11539	4.33241	3	27.5688	25.9784	26.4783	22.3427	22.3427	22.3427
P62995	TRA2B	2.70883	4.35185	3	25.5097	27.0922	27.4819	22.3427	22.3427	22.3427
P53582	METAP1	8.19754	4.35485	3	26.6728	26.6728	26.7473	22.3427	22.3427	22.3427
P61006	RAB8A	4.38185	4.36276	3	26.5052	26.4572	27.1541	22.3427	22.3427	22.3427
Q96HE7	ERO1A	3.7326	4.45477	3	26.1297	27.1803	27.0826	22.3427	22.3427	22.3427
O60925	PFDN1	6.23661	4.46928	3	26.9686	26.7176	26.7498	22.3427	22.3427	22.3427
Q9GZL7	WDR12	5.26371	4.47909	3	26.5473	26.9906	26.9276	22.3427	22.3427	22.3427
P46926	GNPDA1	3.08737	4.49573	3	27.0561	25.8925	27.5669	22.3427	22.3427	22.3427
P56134	ATP5MF	3.49187	4.49667	3	26.3107	26.6078	27.5997	22.3427	22.3427	22.3427
P07602	PSAP	3.89297	4.53993	3	26.9798	27.366	26.3022	22.3427	22.3427	22.3427
O95831	AIFM1	3.64319	4.56717	3	26.5478	27.6341	26.5478	22.3427	22.3427	22.3427
P60983	GMFB	2.62552	4.58974	3	27.6115	27.6292	27.564	24.35	22.3427	22.3427
P08754	GNAI3	8.35868	4.59453	3	26.9329	26.8983	26.9807	22.3427	22.3427	22.3427
P35244	RPA3	3.62131	4.59891	3	26.3443	27.6166	26.8641	22.3427	22.3427	22.3427
P30520	ADSS2	3.48628	4.60035	3	27.048	26.2038	27.5775	22.3427	22.3427	22.3427
Q9HDC9	APMAP	4.45377	4.60984	3	27.4058	26.7652	26.6867	22.3427	22.3427	22.3427
P53597	SUCLG1	4.68067	4.68121	3	27.1594	27.2873	26.6252	22.3427	22.3427	22.3427
Q99471	PFDN5	4.576	4.68665	3	27.4576	26.8604	26.7701	22.3427	22.3427	22.3427
Q15370	ELOB	3.57014	4.70572	3	27.1785	26.3184	27.6486	22.3427	22.3427	22.3427
P25685	DNAJB1	3.93188	4.74264	3	27.6466	26.5475	27.0621	22.3427	22.3427	22.3427
Q16698	DECR1	4.40822	4.74592	3	27.3422	27.3164	26.6074	22.3427	22.3427	22.3427
Q8TAT6	NPLOC4	6.19644	4.76905	3	27.0257	27.0257	27.284	22.3427	22.3427	22.3427
O43488	AKR7A2	3.48786	4.77596	3	26.314	27.3459	27.6963	22.3427	22.3427	22.3427
Q9Y295	DRG1	4.38734	4.79783	3	26.6486	27.3639	27.4093	22.3427	22.3427	22.3427
Q9P035	HACD3	5.31254	4.87646	3	27.4994	27.0045	27.1536	22.3427	22.3427	22.3427
P11279	LAMP1	5.19247	4.88154	3	27.0073	27.53	27.1355	22.3427	22.3427	22.3427
Q15050	RRS1	5.24514	4.90879	3	27.3158	27.4792	26.9596	22.3427	22.3427	22.3427
Q7Z4W1	DCXR	6.81235	4.93757	3	27.4054	27.2178	27.2178	22.3427	22.3427	22.3427
P61619	SEC61A1	5.63274	4.95909	3	27.1857	27.5495	27.1703	22.3427	22.3427	22.3427
Q9HB07	MYG1	5.21811	4.97885	3	27.3503	27.0346	27.5799	22.3427	22.3427	22.3427
Q9H3N1	TMX1	3.46719	4.97987	3	28.1307	27.2111	26.626	22.3427	22.3427	22.3427
Q9BRA2	TXNDC17	2.27492	4.98778	3	28.1722	28.2994	25.52	22.3427	22.3427	22.3427
P55795	HNRNPH2	3.07823	5.03113	3	28.0827	27.7649	26.274	22.3427	22.3427	22.3427
Q6P5R6	RPL22L1	3.02985	5.03658	3	26.2649	28.1792	27.6939	22.3427	22.3427	22.3427
Q99584	S100A13	3.37602	5.05354	3	26.9273	26.9273	28.3343	22.3427	22.3427	22.3427
P21912	SDHB	3.15445	5.10935	3	28.0301	27.9552	26.3711	22.3427	22.3427	22.3427
P61081	UBE2M	4.82684	5.12335	3	27.5706	27.0724	27.7553	22.3427	22.3427	22.3427
Q9BVK6	TMED9	5.70937	5.1323	3	27.7004	27.4465	27.2783	22.3427	22.3427	22.3427
P61803	DAD1	8.67209	5.13899	3	27.4594	27.4594	27.5263	22.3427	22.3427	22.3427
P21926	CD9	3.46933	5.1506	3	27.652	28.1854	26.6426	22.3427	22.3427	22.3427
Q9Y383	LUC7L2	3.44366	5.17913	3	26.6118	28.1133	27.8406	22.3427	22.3427	22.3427
Q04837	SSBP1	4.91435	5.22283	3	27.763	27.7634	27.1703	22.3427	22.3427	22.3427
Q9NX63	CHCHD3	6.77278	5.24547	3	27.6739	27.454	27.6367	22.3427	22.3427	22.3427
O43670	ZNF207	4.31592	5.25501	3	27.0438	27.7897	27.9597	22.3427	22.3427	22.3427
O14929	HAT1	5.76393	5.26379	3	27.808	27.3867	27.6249	22.3427	22.3427	22.3427
Q9HAV7	GRPEL1	4.83334	5.30613	3	27.9163	27.2338	27.7966	22.3427	22.3427	22.3427
Q92522	H1-10	4.93894	5.32555	3	27.2794	27.7923	27.9332	22.3427	22.3427	22.3427
Q9GZT3	SLIRP	5.29088	5.3294	3	27.8473	27.8211	27.3481	22.3427	22.3427	22.3427
P67870	CSNK2B	4.05864	5.32981	3	28.3208	27.2291	27.4678	22.3427	22.3427	22.3427
Q9H2U2	PPA2	7.18568	5.33497	3	27.6232	27.6232	27.7867	22.3427	22.3427	22.3427
Q8NCW5	NAXE	5.00515	5.39896	3	27.6177	28.1218	27.4856	22.3427	22.3427	22.3427
P49458	SRP9	3.77958	5.47899	3	27.4208	27.4208	28.6237	22.3427	22.3427	22.3427
P36957	DLST	4.11256	5.53351	3	28.5329	27.6482	27.4477	22.3427	22.3427	22.3427
Q15758	SLC1A5	5.79419	5.57073	3	28.1268	27.688	27.9256	22.3427	22.3427	22.3427
P62854	RPS26	4.18317	5.64981	3	30.6076	30.7982	30.7562	24.5366	25.0282	25.6479
Q9H9B4	SFXN1	4.81698	5.75725	3	27.9713	27.7811	28.5476	22.3427	22.3427	22.3427
O00487	PSMD14	5.45527	5.81384	3	28.4746	27.9547	28.0404	22.3427	22.3427	22.3427
Q96T76	MMS19	7.61135	5.93274	3	28.2281	28.2281	28.3703	22.3427	22.3427	22.3427
Q9P0L0	VAPA	5.0189	5.96075	3	28.7051	27.9834	28.222	22.3427	22.3427	22.3427
P25786	PSMA1	4.6383	6.01436	3	27.8953	28.3559	28.8202	22.3427	22.3427	22.3427
P52815	MRPL12	3.83402	6.015	3	28.7006	28.8625	27.5101	22.3427	22.3427	22.3427
P61970	NUTF2	4.93787	6.01586	3	28.0976	28.1727	28.8056	22.3427	22.3427	22.3427
Q99439	CNN2	4.24875	6.09684	3	28.9284	27.7875	28.6029	22.3427	22.3427	22.3427
P12236	SLC25A6	5.81605	6.11327	3	32.4939	32.3248	32.2746	26.3787	26.0106	26.3643
Q9UK76	JPT1	4.1632	6.12309	3	28.393	29.1194	27.8851	22.3427	22.3427	22.3427
P51858	HDGF	3.40266	6.15511	3	29.5552	28.301	27.6373	22.3427	22.3427	22.3427
P37108	SRP14	5.01896	6.16227	3	28.2856	28.944	28.2856	22.3427	22.3427	22.3427
P49720	PSMB3	5.81787	6.23386	3	28.8558	28.4188	28.4552	22.3427	22.3427	22.3427
P10606	COX5B	4.15917	6.23698	3	28.7433	29.1153	27.8806	22.3427	22.3427	22.3427
P07108	DBI	4.75268	6.26586	3	28.3736	29.1285	28.3238	22.3427	22.3427	22.3427
P30040	ERP29	5.19933	6.268	3	28.9961	28.3181	28.518	22.3427	22.3427	22.3427
Q9H0U4	RAB1B	3.39683	6.35436	3	30.4234	30.8986	30.6959	23.7523	23.7523	25.4503
P53999	SUB1	4.02921	6.45826	3	28.7983	28.0949	29.5099	22.3427	22.3427	22.3427
Q13404	UBE2V1	5.43182	6.59128	3	28.7315	28.7672	29.3033	22.3427	22.3427	22.3427
P43487	RANBP1	5.19112	6.61343	3	29.1284	28.5322	29.2079	22.3427	22.3427	22.3427
P35637	FUS	3.96507	6.62194	3	28.4013	28.6728	29.82	22.3427	22.3427	22.3427
P62244	RPS15A	5.96532	6.9259	3	29.349	28.991	29.4659	22.3427	22.3427	22.3427
P35268	RPL22	9.92452	6.94879	3	29.314	29.2966	29.264	22.3427	22.3427	22.3427
P07437	TUBB	5.67054	6.97578	3	33.2478	33.0697	33.2759	26.3896	25.9065	26.37
P61513	RPL37A	4.89675	7.01151	3	29.763	29.4502	28.8496	22.3427	22.3427	22.3427
P42766	RPL35	6.27853	7.73654	3	30.1907	30.2332	29.814	22.3427	22.3427	22.3427
P17096	HMGA1	6.38031	7.76618	3	30.352	30.0456	29.9292	22.3427	22.3427	22.3427
Q86V81	ALYREF	6.40601	7.7681	3	30.3072	30.1448	29.8806	22.3427	22.3427	22.3427
P84077	ARF1	4.60029	7.82279	3	30.7644	30.1965	29.5358	22.3427	22.3427	22.3427
Q09028	RBBP4	5.32387	7.88066	3	30.6805	29.8976	30.0921	22.3427	22.3427	22.3427
P67809	YBX1	6.0421	7.96171	3	30.5057	29.9948	30.4129	22.3427	22.3427	22.3427
Q16629	SRSF7	5.56049	7.98364	3	30.3434	30.6778	29.958	22.3427	22.3427	22.3427
P26447	S100A4	6.6393	8.21053	3	30.4336	30.7829	30.4433	22.3427	22.3427	22.3427
Q9NW13	RBM28	3.13929	1.81145	4	23.9607	24.5413	23.9607	22.3427	22.3427	22.3427
Q14203	DCTN1	2.38998	2.36898	4	24.3117	24.3117	25.5118	22.3427	22.3427	22.3427
P23368	ME2	2.16205	2.42062	4	24.2906	24.2906	25.7089	22.3427	22.3427	22.3427
P62879	GNB2	3.27596	2.58174	4	25.433	24.6702	24.6702	22.3427	22.3427	22.3427
Q9UKY7	CDV3	2.32223	2.59313	4	24.744	25.8058	24.2578	22.3427	22.3427	22.3427
P14927	UQCRB	5.03142	2.60838	4	24.8589	25.1356	24.8589	22.3427	22.3427	22.3427
Q9BYT8	NLN	2.48242	2.78618	4	24.6442	26.0157	24.7269	22.3427	22.3427	22.3427
Q96GQ7	DDX27	2.10293	2.8155	4	24.5868	26.3011	24.5868	22.3427	22.3427	22.3427
P61201	COPS2	2.28518	2.91555	4	24.7322	26.3106	24.7322	22.3427	22.3427	22.3427
Q99798	ACO2	2.30825	2.977	4	26.106	24.3125	25.5407	22.3427	22.3427	22.3427
Q13177	PAK2	2.7801	3.07683	4	25.1209	24.9109	26.2269	22.3427	22.3427	22.3427
P52888	THOP1	2.96619	3.08775	4	26.1625	25.0645	25.0645	22.3427	22.3427	22.3427
O00116	AGPS	2.91036	3.28185	4	26.3788	25.0047	25.4903	22.3427	22.3427	22.3427
Q9BZK7	TBL1XR1	3.78548	3.28246	4	25.1549	25.7829	25.9379	22.3427	22.3427	22.3427
Q14694	USP10	3.00186	3.30154	4	26.3331	25.0096	25.5902	22.3427	22.3427	22.3427
Q96TA1	NIBAN2	4.88223	3.31756	4	25.5324	25.5324	25.9161	22.3427	22.3427	22.3427
O60762	DPM1	2.55087	3.3298	4	25.164	25.164	26.6897	22.3427	22.3427	22.3427
Q9BZE1	MRPL37	3.51803	3.36116	4	25.4235	25.4107	26.2776	22.3427	22.3427	22.3427
P50851	LRBA	2.57131	3.36704	4	25.202	25.202	26.7253	22.3427	22.3427	22.3427
P78344	EIF4G2	2.41334	3.47687	4	25.0031	25.5178	26.938	22.3427	22.3427	22.3427
O60884	DNAJA2	2.09074	3.47798	4	25.1136	25.1047	27.2438	22.3427	22.3427	22.3427
Q9UBB4	ATXN10	3.05809	3.49376	4	25.8697	25.1418	26.498	22.3427	22.3427	22.3427
O43747	AP1G1	2.06704	3.50381	4	24.4352	26.2421	26.8624	22.3427	22.3427	22.3427
Q05682	CALD1	3.86045	3.50667	4	25.4588	26.3002	25.7892	22.3427	22.3427	22.3427
Q9H307	PNN	3.50586	3.52199	4	26.4702	25.562	25.562	22.3427	22.3427	22.3427
P62633	CNBP	2.07626	3.52668	4	28.3283	28.3757	27.5044	25.8852	23.8715	23.8715
Q6L8Q7	PDE12	3.29842	3.53634	4	25.5354	25.5354	26.5664	22.3427	22.3427	22.3427
Q8TEX9	IPO4	2.30584	3.5715	4	26.6031	26.4961	24.6436	22.3427	22.3427	22.3427
Q8NE71	ABCF1	4.29429	3.62141	4	25.6289	25.9549	26.3087	22.3427	22.3427	22.3427
Q9Y5X3	SNX5	5.18712	3.64475	4	26.2231	25.8697	25.8697	22.3427	22.3427	22.3427
P26006	ITGA3	2.00114	3.66608	4	27.5316	25.3222	26.5904	23.7604	22.3427	22.3427
Q14558	PRPSAP1	3.43284	3.6661	4	26.3605	26.3147	25.3514	22.3427	22.3427	22.3427
Q9Y3D9	MRPS23	2.83549	3.68925	4	25.6406	25.4814	26.974	22.3427	22.3427	22.3427
Q9Y221	NIP7	3.58584	3.73723	4	25.5312	26.1179	26.5908	22.3427	22.3427	22.3427
A0MZ66	SHTN1	3.12186	3.74311	4	26.5265	25.2788	26.4523	22.3427	22.3427	22.3427
O75306	NDUFS2	3.34623	3.77702	4	26.2296	25.4542	26.6755	22.3427	22.3427	22.3427
O15145	ARPC3	2.75957	3.80543	4	26.0691	25.3049	27.0705	22.3427	22.3427	22.3427
Q10713	PMPCA	5.12405	3.8106	4	26.3852	26.1303	25.9446	22.3427	22.3427	22.3427
Q96I99	SUCLG2	3.37965	3.81757	4	26.865	25.8583	25.7577	22.3427	22.3427	22.3427
Q92900	UPF1	7.88441	3.8801	4	26.1963	26.1963	26.2758	22.3427	22.3427	22.3427
O43681	GET3	3.21826	3.88775	4	26.9842	25.6416	26.0656	22.3427	22.3427	22.3427
O00203	AP3B1	3.0895	3.89944	4	25.813	27.1006	25.813	22.3427	22.3427	22.3427
Q92769	HDAC2	2.48459	3.9195	4	26.8875	25.0146	26.8846	22.3427	22.3427	22.3427
Q9Y281	CFL2	2.00487	3.92386	4	26.6389	26.8718	27.6622	22.3427	22.3427	24.7159
P61026	RAB10	5.49135	3.94662	4	26.1642	26.2017	26.5023	22.3427	22.3427	22.3427
Q9H0S4	DDX47	2.89248	3.96438	4	25.7091	25.931	27.2813	22.3427	22.3427	22.3427
Q9NX58	LYAR	7.87701	3.97066	4	26.2862	26.3679	26.2862	22.3427	22.3427	22.3427
Q9NR12	PDLIM7	2.90291	3.97483	4	27.203	26.2364	25.5133	22.3427	22.3427	22.3427
Q99615	DNAJC7	5.91546	3.98129	4	26.2395	26.4931	26.2395	22.3427	22.3427	22.3427
Q9NUQ2	AGPAT5	6.35789	3.99635	4	26.2734	26.4706	26.2734	22.3427	22.3427	22.3427
O95299	NDUFA10	7.37418	3.99669	4	26.3229	26.2859	26.4095	22.3427	22.3427	22.3427
Q12849	GRSF1	3.36191	4.03373	4	25.7023	27.008	26.4191	22.3427	22.3427	22.3427
P51398	DAP3	7.0995	4.04746	4	26.4086	26.4546	26.3075	22.3427	22.3427	22.3427
Q9Y5K5	UCHL5	4.19796	4.05967	4	26.1697	26.1697	26.8679	22.3427	22.3427	22.3427
Q14166	TTLL12	2.67489	4.11816	4	25.871	27.6262	25.8856	22.3427	22.3427	22.3427
Q9Y2R9	MRPS7	2.21346	4.13638	4	26.5662	27.7871	25.0841	22.3427	22.3427	22.3427
Q99961	SH3GL1	4.97449	4.15202	4	26.7982	26.3431	26.3431	22.3427	22.3427	22.3427
Q96FQ6	S100A16	7.82349	4.16972	4	26.569	26.4697	26.4987	22.3427	22.3427	22.3427
P62140	PPP1CB	3.55009	4.16986	4	25.817	26.8065	26.9143	22.3427	22.3427	22.3427
Q9Y285	FARSA	3.72864	4.19779	4	27.1725	26.192	26.2572	22.3427	22.3427	22.3427
Q9BVP2	GNL3	5.69545	4.26115	4	26.4141	26.6309	26.7667	22.3427	22.3427	22.3427
Q96DI7	SNRNP40	3.18493	4.28376	4	27.4524	25.9246	26.5026	22.3427	22.3427	22.3427
P17858	PFKL	2.85105	4.36499	4	27.606	25.6949	26.8223	22.3427	22.3427	22.3427
Q9UNZ2	NSFL1C	4.00814	4.40438	4	26.2516	26.7615	27.2282	22.3427	22.3427	22.3427
P49756	RBM25	4.98033	4.42723	4	27.079	26.5356	26.6954	22.3427	22.3427	22.3427
O43765	SGTA	3.01257	4.46281	4	25.8571	27.625	26.9346	22.3427	22.3427	22.3427
P33240	CSTF2	4.27984	4.50376	4	27.3299	26.5239	26.6858	22.3427	22.3427	22.3427
P08559	PDHA1	3.9034	4.50923	4	27.4658	26.5481	26.542	22.3427	22.3427	22.3427
P35222	CTNNB1	2.42909	4.51248	4	27.7321	25.3767	27.4569	22.3427	22.3427	22.3427
P13797	PLS3	2.91113	4.65418	4	27.6053	25.8572	27.5282	22.3427	22.3427	22.3427
P11310	ACADM	2.78775	4.65979	4	27.3394	25.809	27.8592	22.3427	22.3427	22.3427
Q9UEW8	STK39	2.41411	4.70568	4	25.5079	27.578	28.0594	22.3427	22.3427	22.3427
P61758	VBP1	2.19224	4.71777	4	28.2206	27.4302	28.1354	24.9474	22.3427	22.3427
P59998	ARPC4	5.02126	4.73281	4	27.278	27.2073	26.7414	22.3427	22.3427	22.3427
O14744	PRMT5	4.2867	4.81344	4	27.3807	26.6338	27.454	22.3427	22.3427	22.3427
Q92896	GLG1	3.10502	4.87763	4	27.4905	26.1942	27.9764	22.3427	22.3427	22.3427
P22307	SCP2	2.91852	4.8913	4	27.4396	26.1133	28.1493	22.3427	22.3427	22.3427
Q16881	TXNRD1	3.94939	4.90054	4	27.4904	26.5996	27.6398	22.3427	22.3427	22.3427
P06730	EIF4E	2.98898	4.90682	4	26.7218	26.6312	28.3957	22.3427	22.3427	22.3427
P26885	FKBP2	5.69837	4.91988	4	27.0271	27.4009	27.3599	22.3427	22.3427	22.3427
P14324	FDPS	2.1392	4.95449	4	25.5496	27.3945	28.9476	22.3427	22.3427	22.3427
O43684	BUB3	7.64358	4.97431	4	27.2767	27.3951	27.2793	22.3427	22.3427	22.3427
P57088	TMEM33	3.10685	4.97964	4	26.2616	28.0496	27.656	22.3427	22.3427	22.3427
P51114	FXR1	3.22022	4.98023	4	28.0623	26.3523	27.5543	22.3427	22.3427	22.3427
P31150	GDI1	4.5304	4.9843	4	27.1123	27.0713	27.7976	22.3427	22.3427	22.3427
Q16630	CPSF6	3.784	5.00794	4	27.7336	27.6986	26.6199	22.3427	22.3427	22.3427
P24666	ACP1	2.62259	5.0562	4	28.4124	27.8233	25.9611	22.3427	22.3427	22.3427
Q14019	COTL1	4.4886	5.06524	4	27.8743	27.3067	27.043	22.3427	22.3427	22.3427
Q9UK22	FBXO2	4.00363	5.07046	4	27.8975	26.7943	27.5479	22.3427	22.3427	22.3427
P17612	PRKACA	4.73741	5.07908	4	26.9965	27.618	27.651	22.3427	22.3427	22.3427
P30043	BLVRB	3.6278	5.13307	4	28.0099	26.6684	27.7491	22.3427	22.3427	22.3427
P67775	PPP2CA	4.36891	5.15826	4	27.9698	27.4906	27.0426	22.3427	22.3427	22.3427
O75477	ERLIN1	4.54555	5.16237	4	27.7462	27.7477	27.0215	22.3427	22.3427	22.3427
Q9NR56	MBNL1	6.24977	5.17274	4	27.5462	27.6547	27.3455	22.3427	22.3427	22.3427
P00491	PNP	4.23163	5.20632	4	28.0182	27.6177	27.0114	22.3427	22.3427	22.3427
P68402	PAFAH1B2	4.41072	5.22683	4	27.2505	28.0951	27.3631	22.3427	22.3427	22.3427
Q15459	SF3A1	3.38198	5.23261	4	27.7234	26.673	28.3297	22.3427	22.3427	22.3427
O15347	HMGB3	3.81815	5.26909	4	26.8582	28.007	27.9703	22.3427	22.3427	22.3427
Q13442	PDAP1	2.98418	5.30583	4	28.4642	26.427	28.0545	22.3427	22.3427	22.3427
Q15637	SF1	4.08144	5.3084	4	27.2304	28.2921	27.4309	22.3427	22.3427	22.3427
Q15287	RNPS1	3.63098	5.35842	4	28.4794	27.0038	27.6204	22.3427	22.3427	22.3427
Q15102	PAFAH1B3	3.71504	5.3609	4	27.6415	27.0311	28.4384	22.3427	22.3427	22.3427
P46977	STT3A	5.09379	5.38642	4	27.428	27.6975	28.062	22.3427	22.3427	22.3427
Q96A72	MAGOHB	4.32436	5.43888	4	27.2028	28.0485	28.0935	22.3427	22.3427	22.3427
P09455	RBP1	4.87863	5.46644	4	28.2136	27.5017	27.7123	22.3427	22.3427	22.3427
P07954	FH	4.86996	5.50036	4	28.2683	27.596	27.6651	22.3427	22.3427	22.3427
Q8IYB3	SRRM1	4.73852	5.59707	4	28.3542	27.5426	27.9226	22.3427	22.3427	22.3427
P30046	DDT	2.13923	5.60163	4	29.048	25.7237	29.0615	22.3427	22.3427	22.3427
P22061	PCMT1	5.58631	5.61024	4	27.8531	27.769	28.2369	22.3427	22.3427	22.3427
P11233	RALA	5.83868	5.62765	4	28.2177	27.8769	27.8166	22.3427	22.3427	22.3427
O14561	NDUFAB1	5.93791	5.63706	4	28.1822	27.9841	27.7731	22.3427	22.3427	22.3427
P60891	PRPS1	3.99964	5.6572	4	28.709	27.7884	27.5024	22.3427	22.3427	22.3427
Q9NZL9	MAT2B	4.98897	5.65983	4	28.2244	27.5928	28.1905	22.3427	22.3427	22.3427
P10644	PRKAR1A	3.64405	5.66397	4	27.9476	28.8119	27.2606	22.3427	22.3427	22.3427
P60953	CDC42	4.24119	5.71245	4	28.1995	28.5219	27.4443	22.3427	22.3427	22.3427
Q9UHD1	CHORDC1	4.2911	5.75864	4	28.3793	28.4476	27.4772	22.3427	22.3427	22.3427
Q8WXF1	PSPC1	5.40837	5.79736	4	28.1045	28.4418	27.874	22.3427	22.3427	22.3427
Q9Y5S9	RBM8A	3.47413	5.8186	4	29.0225	28.2028	27.2587	22.3427	22.3427	22.3427
P55327	TPD52	7.0844	5.84763	4	28.1976	28.2962	28.0773	22.3427	22.3427	22.3427
P04080	CSTB	5.16239	5.85896	4	28.5773	28.0839	27.944	22.3427	22.3427	22.3427
Q15631	TSN	4.43476	5.88167	4	28.7238	28.243	27.7065	22.3427	22.3427	22.3427
Q14444	CAPRIN1	3.9793	5.92669	4	28.7799	27.5128	28.5156	22.3427	22.3427	22.3427
O15144	ARPC2	4.90682	5.94727	4	28.3215	28.6648	27.8838	22.3427	22.3427	22.3427
P16422	EPCAM	6.59386	6.01849	4	28.4476	28.4477	28.1884	22.3427	22.3427	22.3427
P63220	RPS21	4.60129	6.02696	4	28.3316	27.9164	28.8611	22.3427	22.3427	22.3427
Q15691	MAPRE1	4.08612	6.04037	4	28.2723	29.0714	27.8057	22.3427	22.3427	22.3427
Q9BUF5	TUBB6	3.91709	6.05487	4	29.2035	28.1146	27.8748	22.3427	22.3427	22.3427
P33316	DUT	7.27162	6.05588	4	28.3398	28.3398	28.5163	22.3427	22.3427	22.3427
P31942	HNRNPH3	6.37704	6.09877	4	28.5953	28.256	28.4733	22.3427	22.3427	22.3427
P51571	SSR4	5.35306	6.12643	4	28.7481	28.5265	28.1329	22.3427	22.3427	22.3427
P18085	ARF4	5.39082	6.12979	4	28.4655	28.781	28.1711	22.3427	22.3427	22.3427
Q9UHV9	PFDN2	5.24438	6.13972	4	28.1553	28.8201	28.472	22.3427	22.3427	22.3427
P49755	TMED10	6.98269	6.1448	4	28.3479	28.5744	28.5404	22.3427	22.3427	22.3427
Q13509	TUBB3	5.98995	6.1811	4	28.7335	28.5391	28.2989	22.3427	22.3427	22.3427
P20340	RAB6A	3.61139	6.22955	4	29.0557	29.095	27.5662	22.3427	22.3427	22.3427
P23588	EIF4B	5.91108	6.24011	4	28.6618	28.763	28.3238	22.3427	22.3427	22.3427
Q9NQC3	RTN4	5.54288	6.26984	4	28.8154	28.7366	28.2857	22.3427	22.3427	22.3427
O15479	MAGEB2	5.06378	6.3037	4	28.4444	29.0836	28.4114	22.3427	22.3427	22.3427
P63208	SKP1	4.58605	6.36027	4	28.6078	28.2533	29.2479	22.3427	22.3427	22.3427
P68036	UBE2L3	5.30746	6.4485	4	29.056	28.4123	28.9054	22.3427	22.3427	22.3427
Q14011	CIRBP	4.84239	6.45137	4	28.8795	28.3169	29.1859	22.3427	22.3427	22.3427
P15531	NME1	5.56815	6.45699	4	33.6307	33.6522	33.6629	26.9332	27.1371	27.5046
P17931	LGALS3	4.35478	6.53493	4	28.7473	28.3614	29.5243	22.3427	22.3427	22.3427
P54819	AK2	5.4457	6.64347	4	29.1308	29.2087	28.6191	22.3427	22.3427	22.3427
Q03135	CAV1	3.68898	6.66296	4	27.9774	29.504	29.5357	22.3427	22.3427	22.3427
P20290	BTF3	5.58555	6.6727	4	28.8357	28.8527	29.358	22.3427	22.3427	22.3427
P52907	CAPZA1	4.24771	6.74791	4	29.7858	28.9906	28.4956	22.3427	22.3427	22.3427
P62136	PPP1CA	7.35286	6.79338	4	29.2619	29.0672	29.0793	22.3427	22.3427	22.3427
P46783	RPS10	5.32137	6.83298	4	28.9471	28.9967	29.5834	22.3427	22.3427	22.3427
P09012	SNRPA	7.75092	7.0155	4	29.2601	29.4357	29.379	22.3427	22.3427	22.3427
P62266	RPS23	7.74989	7.08887	4	29.5255	29.3447	29.4246	22.3427	22.3427	22.3427
P84090	ERH	6.73003	7.18486	4	29.3916	29.4797	29.7115	22.3427	22.3427	22.3427
P22392	NME2	4.84093	7.37443	4	29.6518	29.2488	30.2509	22.3427	22.3427	22.3427
P06753	TPM3	6.76188	7.48267	4	29.6882	30.0141	29.7739	22.3427	22.3427	22.3427
P00403	MT-CO2	6.69182	7.89229	4	30.347	30.3372	30.0209	22.3427	22.3427	22.3427
P62913	RPL11	5.96691	7.92466	4	29.9862	30.5519	30.2642	22.3427	22.3427	22.3427
P62263	RPS14	6.36846	8.25151	4	30.8636	30.4743	30.4449	22.3427	22.3427	22.3427
Q9Y3U8	RPL36	6.44493	8.27304	4	30.6998	30.3617	30.7858	22.3427	22.3427	22.3427
E9PAV3	NACA	7.3852	8.40365	4	30.8357	30.8094	30.5941	22.3427	22.3427	22.3427
P62899	RPL31	8.63937	8.66539	4	30.9944	31.0803	30.9497	22.3427	22.3427	22.3427
P50914	RPL14	7.51446	8.78499	4	31.2719	31.0864	31.0249	22.3427	22.3427	22.3427
Q13838	DDX39B	6.78844	9.32562	4	31.4537	31.6839	31.8675	22.3427	22.3427	22.3427
O43847	NRDC	3.33725	2.03308	5	24.762	24.1828	24.1828	22.3427	22.3427	22.3427
Q2TAY7	SMU1	2.05181	2.50625	5	25.4454	25.3014	23.8002	22.3427	22.3427	22.3427
Q9UIJ7	AK3	4.04699	3.00816	5	25.7275	25.1626	25.1626	22.3427	22.3427	22.3427
Q9Y446	PKP3	4.18133	3.01932	5	25.3471	25.0671	25.672	22.3427	22.3427	22.3427
Q06124	PTPN11	4.29441	3.12692	5	25.1547	25.7355	25.5188	22.3427	22.3427	22.3427
Q9H0C8	ILKAP	4.20555	3.14853	5	25.8107	25.4742	25.1889	22.3427	22.3427	22.3427
O15355	PPM1G	2.47112	3.18388	5	26.1706	25.892	24.5174	22.3427	22.3427	22.3427
Q9UNX4	WDR3	2.00267	3.19177	5	24.1534	26.3035	26.1466	22.3427	22.3427	22.3427
Q9Y5M8	SRPRB	2.78874	3.197	5	24.7337	26.159	25.7265	22.3427	22.3427	22.3427
Q00059	TFAM	2.66024	3.62075	5	26.3626	26.5253	26.5437	23.8838	22.3427	22.3427
P28482	MAPK1	2.05793	3.64059	5	25.6071	24.8942	27.4487	22.3427	22.3427	22.3427
P49792	RANBP2	2.82915	3.64236	5	26.1113	26.727	25.117	22.3427	22.3427	22.3427
Q8WXX5	DNAJC9	2.46	3.69377	5	25.0575	27.1178	25.9343	22.3427	22.3427	22.3427
O00541	PES1	2.98563	3.73687	5	25.6419	26.9552	25.6419	22.3427	22.3427	22.3427
Q99848	EBNA1BP2	2.29353	3.78242	5	25.4186	27.4827	25.4742	22.3427	22.3427	22.3427
Q9C0C9	UBE2O	2.11963	3.7969	5	24.6796	27.2497	26.4896	22.3427	22.3427	22.3427
Q96G03	PGM2	3.40177	3.86455	5	26.726	26.3634	25.5326	22.3427	22.3427	22.3427
P60981	DSTN	5.36397	3.89683	5	29.3176	29.1865	28.9525	25.2162	25.2162	25.3337
Q15785	TOMM34	2.36612	3.92821	5	27.3434	26.4403	25.0291	22.3427	22.3427	22.3427
Q9NVA2	SEPTIN11	2.97283	3.94413	5	25.3587	26.6855	26.8164	22.3427	22.3427	22.3427
P30419	NMT1	3.13196	3.98166	5	25.7198	26.1038	27.1497	22.3427	22.3427	22.3427
Q9H0D6	XRN2	3.26601	4.05104	5	27.0771	25.6875	26.4168	22.3427	22.3427	22.3427
P19525	EIF2AK2	4.24434	4.1382	5	26.2429	26.9427	26.2572	22.3427	22.3427	22.3427
P29218	IMPA1	3.44369	4.14802	5	26.9121	26.8067	25.7535	22.3427	22.3427	22.3427
Q96PK6	RBM14	2.93379	4.18537	5	27.533	25.9242	26.1272	22.3427	22.3427	22.3427
Q9BSJ8	ESYT1	2.97051	4.25333	5	27.4378	26.6518	25.6986	22.3427	22.3427	22.3427
Q9H4A4	RNPEP	7.36433	4.27717	5	26.5433	26.6424	26.6741	22.3427	22.3427	22.3427
Q9NQW7	XPNPEP1	2.44391	4.30466	5	27.2075	26.7791	27.8471	22.3427	24.2342	22.3427
Q92499	DDX1	4.98998	4.3164	5	26.9718	26.5028	26.5028	22.3427	22.3427	22.3427
Q8IWX8	CHERP	2.51933	4.32127	5	25.3313	27.1666	27.4941	22.3427	22.3427	22.3427
P35241	RDX	2.68626	4.33542	5	26.2873	25.8743	27.8728	22.3427	22.3427	22.3427
O43615	TIMM44	4.47716	4.41317	5	26.7877	26.3685	27.1116	22.3427	22.3427	22.3427
Q9BUL8	PDCD10	2.6703	4.41974	5	28.0166	26.1354	26.1354	22.3427	22.3427	22.3427
Q96P70	IPO9	5.12021	4.43967	5	26.7264	27.0642	26.5567	22.3427	22.3427	22.3427
Q01970	PLCB3	4.03136	4.50268	5	26.9095	27.3029	26.3239	22.3427	22.3427	22.3427
Q9UHB9	SRP68	4.38348	4.58734	5	26.4828	27.2847	27.0227	22.3427	22.3427	22.3427
P10599	TXN	3.73885	4.60801	5	30.8494	31.1857	31.3504	25.9021	26.9059	26.7535
Q9NUQ9	CYRIB	2.83761	4.61522	5	27.0365	27.9405	25.8969	22.3427	22.3427	22.3427
P84095	RHOG	4.44682	4.63759	5	27.3874	26.5911	26.9626	22.3427	22.3427	22.3427
Q13630	GFUS	3.21289	4.70459	5	27.9953	26.4311	26.7157	22.3427	22.3427	22.3427
P20810	CAST	4.11165	4.74013	5	26.9684	26.6553	27.625	22.3427	22.3427	22.3427
Q92552	MRPS27	3.49485	4.7564	5	26.4091	27.0557	27.8326	22.3427	22.3427	22.3427
P49257	LMAN1	9.5793	4.7652	5	27.1013	27.1317	27.0908	22.3427	22.3427	22.3427
P49189	ALDH9A1	3.58833	4.78967	5	26.4327	27.7892	27.1754	22.3427	22.3427	22.3427
P62495	ETF1	2.85953	4.7908	5	27.9578	27.4901	25.9527	22.3427	22.3427	22.3427
Q9UBT2	UBA2	3.14215	4.82575	5	26.1837	27.4012	27.9205	22.3427	22.3427	22.3427
Q12788	TBL3	4.90455	4.85325	5	27.1221	27.5464	26.9196	22.3427	22.3427	22.3427
O43324	EEF1E1	3.04242	4.88355	5	27.8704	26.1258	27.6827	22.3427	22.3427	22.3427
Q8TCT9	HM13	2.98351	4.89765	5	28.1788	27.3454	26.197	22.3427	22.3427	22.3427
P61019	RAB2A	3.89036	4.90049	5	27.8448	27.2024	26.6826	22.3427	22.3427	22.3427
P48735	IDH2	3.31832	4.90429	5	26.6795	28.1819	26.8797	22.3427	22.3427	22.3427
Q96A33	CCDC47	4.3595	4.97959	5	27.4587	26.8198	27.6885	22.3427	22.3427	22.3427
Q13310	PABPC4	3.85917	4.98505	5	27.5361	26.6482	27.7992	22.3427	22.3427	22.3427
O15143	ARPC1B	5.27539	5.17954	5	27.7902	27.537	27.2397	22.3427	22.3427	22.3427
Q13148	TARDBP	4.62602	5.19609	5	27.9226	27.5738	27.1201	22.3427	22.3427	22.3427
P49589	CARS1	3.90865	5.19747	5	26.946	27.5081	28.1665	22.3427	22.3427	22.3427
O95573	ACSL3	3.11205	5.2012	5	26.4152	28.0695	28.1471	22.3427	22.3427	22.3427
Q96I24	FUBP3	4.63858	5.20484	5	27.0893	27.8277	27.7257	22.3427	22.3427	22.3427
Q12904	AIMP1	4.40207	5.25456	5	27.7133	27.9917	27.087	22.3427	22.3427	22.3427
Q9Y2W1	THRAP3	5.04844	5.27293	5	27.9816	27.4757	27.3898	22.3427	22.3427	22.3427
P29373	CRABP2	3.14266	5.27431	5	26.5859	27.7436	28.5216	22.3427	22.3427	22.3427
Q9HC38	GLOD4	6.27272	5.27507	5	27.7066	27.4355	27.7113	22.3427	22.3427	22.3427
Q9BXJ9	NAA15	6.46159	5.31342	5	27.7474	27.7293	27.4918	22.3427	22.3427	22.3427
Q99436	PSMB7	4.57352	5.35598	5	27.2335	27.7881	28.0745	22.3427	22.3427	22.3427
Q92973	TNPO1	5.95078	5.3564	5	27.6197	27.9192	27.5586	22.3427	22.3427	22.3427
P13995	MTHFD2	3.16561	5.37131	5	28.4287	28.1146	26.5989	22.3427	22.3427	22.3427
P05091	ALDH2	5.40946	5.37924	5	27.4167	27.8894	27.8599	22.3427	22.3427	22.3427
Q14258	TRIM25	5.11007	5.49666	5	28.0358	27.4682	28.0143	22.3427	22.3427	22.3427
Q01650	SLC7A5	3.95721	5.51408	5	28.0742	27.147	28.3493	22.3427	22.3427	22.3427
P05141	SLC25A5	3.81495	5.54049	5	29.9877	30.9098	30.1178	24.3275	24.7921	25.2742
P53618	COPB1	5.50133	5.5467	5	27.6045	27.9534	28.1104	22.3427	22.3427	22.3427
P04632	CAPNS1	2.6785	5.54785	5	28.4192	28.3887	29.106	22.3427	22.3427	24.5848
Q13162	PRDX4	4.36678	5.60268	5	27.9621	27.433	28.4411	22.3427	22.3427	22.3427
O60832	DKC1	5.13195	5.61149	5	27.5853	28.083	28.1943	22.3427	22.3427	22.3427
P48444	ARCN1	8.56501	5.62467	5	28.0176	27.9308	27.9539	22.3427	22.3427	22.3427
Q53GQ0	HSD17B12	9.09921	5.66367	5	28.0314	27.9686	28.0192	22.3427	22.3427	22.3427
P13804	ETFA	5.573	5.67612	5	28.3119	27.8558	27.889	22.3427	22.3427	22.3427
P51665	PSMD7	3.95512	5.73671	5	27.8808	28.812	27.5455	22.3427	22.3427	22.3427
O14737	PDCD5	5.36621	5.75409	5	28.4275	27.8828	27.9803	22.3427	22.3427	22.3427
Q13561	DCTN2	4.3702	5.78252	5	28.7067	27.962	27.7071	22.3427	22.3427	22.3427
P00390	GSR	3.2857	5.81908	5	28.3631	29.0326	27.0898	22.3427	22.3427	22.3427
Q01105	SET	6.65041	5.88264	5	31.4313	31.2531	31.4628	25.4505	25.5982	25.4505
P61086	UBE2K	6.60557	5.94079	5	28.1273	28.3048	28.4185	22.3427	22.3427	22.3427
O75964	ATP5MG	9.01535	5.94968	5	28.2576	28.2889	28.3308	22.3427	22.3427	22.3427
Q15366	PCBP2	6.24303	5.96379	5	30.7713	30.6897	31.0023	24.8102	24.9517	24.8102
P31689	DNAJA1	7.04319	6.08698	5	28.3166	28.55	28.4226	22.3427	22.3427	22.3427
O75821	EIF3G	5.04827	6.15436	5	28.7138	28.7115	28.0661	22.3427	22.3427	22.3427
P50454	SERPINH1	6.35319	6.21884	5	28.4327	28.7643	28.4878	22.3427	22.3427	22.3427
Q71DI3	H3C13	2.57182	6.22695	5	34.4581	34.5754	34.6088	29.2452	29.2711	26.4453
Q9BZZ5	API5	5.88865	6.25819	5	28.8682	28.4353	28.4993	22.3427	22.3427	22.3427
Q9BTT0	ANP32E	4.48065	6.28037	5	28.0197	28.8418	29.0079	22.3427	22.3427	22.3427
P06493	CDK1	4.70509	6.2824	5	28.937	28.8474	28.091	22.3427	22.3427	22.3427
P42126	ECI1	9.03944	6.30461	5	28.6883	28.6415	28.6122	22.3427	22.3427	22.3427
P63162	SNRPN	4.69028	6.34568	5	29.0564	28.8545	28.1543	22.3427	22.3427	22.3427
P25788	PSMA3	5.30491	6.35233	5	29.0745	28.5542	28.4565	22.3427	22.3427	22.3427
P63173	RPL38	3.13897	6.4085	5	27.3953	29.2619	29.5965	22.3427	22.3427	22.3427
P61586	RHOA	5.22001	6.45977	5	28.4518	29.1612	28.7946	22.3427	22.3427	22.3427
P27695	APEX1	5.86621	6.5334	5	28.7649	29.1594	28.7042	22.3427	22.3427	22.3427
P10768	ESD	9.51924	6.69321	5	29.0487	29.0584	29.0007	22.3427	22.3427	22.3427
P04899	GNAI2	6.69683	6.79617	5	28.978	29.2966	29.1422	22.3427	22.3427	22.3427
P20618	PSMB1	5.56634	6.81825	5	29.4808	29.1328	28.8695	22.3427	22.3427	22.3427
P25787	PSMA2	4.04172	6.89954	5	28.7053	28.9219	30.0996	22.3427	22.3427	22.3427
Q99729	HNRNPAB	7.35938	6.91519	5	29.3854	29.1859	29.2026	22.3427	22.3427	22.3427
Q04917	YWHAH	6.77347	6.92165	5	29.3205	29.3838	29.0889	22.3427	22.3427	22.3427
O43399	TPD52L2	6.06503	6.9593	5	29.5692	29.2084	29.1286	22.3427	22.3427	22.3427
Q15185	PTGES3	3.2371	6.99246	5	27.9258	30.0321	30.0478	22.3427	22.3427	22.3427
P15559	NQO1	4.11864	7.04056	5	29.5712	30.0032	28.5756	22.3427	22.3427	22.3427
P26368	U2AF2	6.59977	7.08008	5	29.2664	29.3895	29.6126	22.3427	22.3427	22.3427
P19105	MYL12A	5.48602	7.15052	5	29.1267	29.5641	29.789	22.3427	22.3427	22.3427
Q15056	EIF4H	5.85141	7.26557	5	29.2979	29.6958	29.8312	22.3427	22.3427	22.3427
Q05639	EEF1A2	2.68329	7.332	5	30.6419	30.7255	30.7513	22.3427	25.4372	22.3427
O00303	EIF3F	7.507	7.3369	5	29.744	29.7398	29.5551	22.3427	22.3427	22.3427
P63000	RAC1	5.04644	7.35791	5	30.1239	29.7445	29.2336	22.3427	22.3427	22.3427
P62318	SNRPD3	4.03828	7.38679	5	30.3858	29.9715	28.8314	22.3427	22.3427	22.3427
P61981	YWHAG	7.26536	7.50434	5	29.7392	29.8154	29.9867	22.3427	22.3427	22.3427
P30044	PRDX5	5.06193	7.5447	5	29.6816	29.5729	30.4079	22.3427	22.3427	22.3427
P31946	YWHAB	5.19791	7.68002	5	30.1571	30.1239	30.456	22.3427	22.3427	23.0115
P13693	TPT1	6.70968	7.71951	5	30.2416	30.0628	29.8824	22.3427	22.3427	22.3427
P13073	COX4I1	6.57863	7.82045	5	30.3437	29.9544	30.1915	22.3427	22.3427	22.3427
O43169	CYB5B	5.45652	8.00767	5	30.7923	30.1574	30.1016	22.3427	22.3427	22.3427
Q13185	CBX3	7.01509	8.32477	5	30.7744	30.4806	30.7476	22.3427	22.3427	22.3427
P08708	RPS17	4.79778	8.35012	5	31.0652	31.1333	30.8648	23.3274	22.3427	22.3427
P46776	RPL27A	7.19832	8.40081	5	30.6112	30.7169	30.9026	22.3427	22.3427	22.3427
P62888	RPL30	7.00408	8.45056	5	30.8162	30.9466	30.6171	22.3427	22.3427	22.3427
P62851	RPS25	4.26515	8.51495	5	29.919	31.3374	31.3167	22.3427	22.3427	22.3427
P25398	RPS12	8.98566	8.58822	5	30.9712	30.8697	30.9519	22.3427	22.3427	22.3427
P06454	PTMA	6.75522	9.42052	5	31.8945	31.5169	31.8784	22.3427	22.3427	22.3427
Q16401	PSMD5	3.13234	3.66534	6	25.7372	25.5041	26.7829	22.3427	22.3427	22.3427
Q13155	AIMP2	2.70601	3.67887	6	26.8119	26.1868	25.0662	22.3427	22.3427	22.3427
P50570	DNM2	3.8947	3.85455	6	25.9546	26.7242	25.9132	22.3427	22.3427	22.3427
Q7L0Y3	TRMT10C	3.26298	3.87757	6	25.4756	26.7609	26.4245	22.3427	22.3427	22.3427
Q15269	PWP2	2.31808	3.90056	6	26.7364	24.8818	27.1118	22.3427	22.3427	22.3427
P41227	NAA10	2.63224	3.99917	6	26.0006	25.551	27.4742	22.3427	22.3427	22.3427
Q9NTZ6	RBM12	2.43778	4.00174	6	27.0922	25.0374	26.9038	22.3427	22.3427	22.3427
Q8TEM1	NUP210	3.68221	4.00797	6	26.9514	25.9135	26.1873	22.3427	22.3427	22.3427
Q9P258	RCC2	3.03873	4.06269	6	26.5197	27.1406	25.556	22.3427	22.3427	22.3427
O60763	USO1	2.46049	4.12783	6	27.1719	27.1025	25.1374	22.3427	22.3427	22.3427
P42285	MTREX	2.23963	4.23191	6	28.1435	25.6969	25.8837	22.3427	22.3427	22.3427
Q14498	RBM39	2.50566	4.34557	6	26.9544	25.3957	27.7149	22.3427	22.3427	22.3427
Q00341	HDLBP	3.46724	4.35508	6	26.5918	26.0939	27.4078	22.3427	22.3427	22.3427
P38606	ATP6V1A	3.1873	4.43056	6	26.9871	25.8915	27.4413	22.3427	22.3427	22.3427
O15371	EIF3D	3.13664	4.44755	6	27.326	27.2038	25.8411	22.3427	22.3427	22.3427
P31040	SDHA	3.97109	4.45543	6	27.3647	26.3956	26.6342	22.3427	22.3427	22.3427
O43491	EPB41L2	6.26966	4.48977	6	26.9879	26.7538	26.7558	22.3427	22.3427	22.3427
O14745	NHERF1	3.30117	4.543	6	26.4839	27.7662	26.4072	22.3427	22.3427	22.3427
O95202	LETM1	3.26306	4.63719	6	26.8975	26.2273	27.8151	22.3427	22.3427	22.3427
Q15008	PSMD6	4.57362	4.72875	6	26.6542	27.1712	27.3891	22.3427	22.3427	22.3427
P55084	HADHB	3.0546	4.83285	6	26.2161	27.2142	28.0965	22.3427	22.3427	22.3427
P27694	RPA1	2.98239	4.85364	6	26.1692	28.137	27.283	22.3427	22.3427	22.3427
O75475	PSIP1	4.03235	4.88842	6	27.8465	26.8817	26.9653	22.3427	22.3427	22.3427
Q06210	GFPT1	3.19413	5.00348	6	26.3323	27.6747	28.0317	22.3427	22.3427	22.3427
Q9NSD9	FARSB	4.16313	5.01548	6	27.6959	27.605	26.7738	22.3427	22.3427	22.3427
Q9H583	HEATR1	3.84152	5.01555	6	26.6894	27.8935	27.492	22.3427	22.3427	22.3427
Q6NZI2	CAVIN1	3.02964	5.07511	6	28.3908	27.4754	26.3875	22.3427	22.3427	22.3427
O15427	SLC16A3	7.37253	5.11733	6	27.3746	27.5364	27.4692	22.3427	22.3427	22.3427
O60716	CTNND1	4.47249	5.11889	6	27.253	27.9598	27.1722	22.3427	22.3427	22.3427
Q16555	DPYSL2	4.47222	5.13278	6	27.3612	27.1096	27.9558	22.3427	22.3427	22.3427
P62191	PSMC1	3.75292	5.14704	6	29.3955	28.8869	29.3377	24.4488	23.3671	24.3631
Q13451	FKBP5	3.86328	5.1693	6	27.0996	27.2068	28.2298	22.3427	22.3427	22.3427
Q08752	PPID	4.86518	5.1752	6	27.1465	27.8388	27.5686	22.3427	22.3427	22.3427
O14776	TCERG1	9.09504	5.24335	6	27.5683	27.6218	27.5683	22.3427	22.3427	22.3427
P40121	CAPG	2.58393	5.40136	6	28.1364	26.1899	28.906	22.3427	22.3427	22.3427
Q6IBS0	TWF2	3.19684	5.46766	6	28.4878	26.6897	28.2537	22.3427	22.3427	22.3427
P07741	APRT	3.26923	5.50929	6	27.5099	27.1273	28.9189	22.3427	22.3427	22.3427
P08237	PFKM	3.71548	5.51433	6	27.9992	27.0708	28.5013	22.3427	22.3427	22.3427
Q9Y6E2	BZW2	6.06056	5.52172	6	28.0547	27.8573	27.6814	22.3427	22.3427	22.3427
P10515	DLAT	4.12626	5.53773	6	27.843	27.3269	28.4716	22.3427	22.3427	22.3427
P30050	RPL12	3.04296	5.57435	6	30.9861	30.8004	29.0477	24.5744	24.5744	24.9622
O75396	SEC22B	6.70242	5.64132	6	28.1356	27.8964	27.9201	22.3427	22.3427	22.3427
Q15293	RCN1	3.57978	5.64266	6	28.4468	27.0567	28.4527	22.3427	22.3427	22.3427
O00571	DDX3X	8.14479	5.6502	6	27.9417	27.982	28.0552	22.3427	22.3427	22.3427
O43252	PAPSS1	4.66698	5.65045	6	28.4587	27.9021	27.6188	22.3427	22.3427	22.3427
P51572	BCAP31	6.02901	5.66397	6	27.8132	28.0037	28.2033	22.3427	22.3427	22.3427
P04844	RPN2	2.00394	5.71801	6	29.31	29.4211	29.1603	22.3427	26.0519	22.3427
Q9UKM9	RALY	5.4332	5.74568	6	28.1962	27.7716	28.2975	22.3427	22.3427	22.3427
Q12874	SF3A3	4.3703	5.75905	6	27.6091	28.0557	28.6406	22.3427	22.3427	22.3427
P05556	ITGB1	3.52173	5.77451	6	27.1359	28.5532	28.6627	22.3427	22.3427	22.3427
Q9UKK9	NUDT5	5.50714	5.83391	6	28.387	28.2728	27.8702	22.3427	22.3427	22.3427
P09661	SNRPA1	6.26376	5.84527	6	28.3634	28.0117	28.189	22.3427	22.3427	22.3427
Q9Y6C9	MTCH2	8.27125	5.90091	6	28.2646	28.1804	28.286	22.3427	22.3427	22.3427
Q9Y2X3	NOP58	8.6987	5.95055	6	28.3097	28.2434	28.3268	22.3427	22.3427	22.3427
Q14978	NOLC1	6.90275	5.9545	6	28.1581	28.3377	28.3959	22.3427	22.3427	22.3427
Q9NS69	TOMM22	3.5628	5.95766	6	27.311	28.7564	28.8338	22.3427	22.3427	22.3427
Q96AE4	FUBP1	4.43311	5.97166	6	28.1788	27.8785	28.8859	22.3427	22.3427	22.3427
P56537	EIF6	3.6784	6.01122	6	28.4097	27.519	29.1332	22.3427	22.3427	22.3427
Q9NTK5	OLA1	5.31687	6.01658	6	28.6986	28.2961	28.0833	22.3427	22.3427	22.3427
P13489	RNH1	5.56352	6.01807	6	28.0499	28.5478	28.4847	22.3427	22.3427	22.3427
Q9NYF8	BCLAF1	7.86924	6.02359	6	28.2933	28.4369	28.3688	22.3427	22.3427	22.3427
Q96C36	PYCR2	3.45606	6.03099	6	28.3862	29.2921	27.4429	22.3427	22.3427	22.3427
P08621	SNRNP70	4.21822	6.0419	6	28.6479	27.7058	28.8003	22.3427	22.3427	22.3427
P11177	PDHB	4.9379	6.0666	6	28.5164	27.9748	28.7369	22.3427	22.3427	22.3427
Q15717	ELAVL1	5.56705	6.12252	6	28.4725	28.7368	28.1865	22.3427	22.3427	22.3427
P16070	CD44	5.24893	6.17644	6	28.1755	28.5404	28.8417	22.3427	22.3427	22.3427
P37802	TAGLN2	6.67076	6.3449	6	28.8014	28.7451	28.5164	22.3427	22.3427	22.3427
O95433	AHSA1	4.46432	6.3607	6	28.1611	29.243	28.7063	22.3427	22.3427	22.3427
Q9P287	BCCIP	4.40849	6.38962	6	28.1204	28.8535	29.2233	22.3427	22.3427	22.3427
P51148	RAB5C	4.59241	6.40126	6	29.144	28.1759	28.9121	22.3427	22.3427	22.3427
P14550	AKR1A1	5.33007	6.4226	6	28.8589	28.3976	29.0395	22.3427	22.3427	22.3427
P99999	CYCS	4.3372	6.52534	6	28.6236	28.4317	29.5491	22.3427	22.3427	22.3427
P25789	PSMA4	6.00708	6.62837	6	28.7323	29.1938	28.9872	22.3427	22.3427	22.3427
Q15084	PDIA6	7.55556	6.73556	6	29.1003	28.9729	29.1617	22.3427	22.3427	22.3427
Q9UMX0	UBQLN1	5.86602	6.83097	6	29.3232	28.8753	29.3227	22.3427	22.3427	22.3427
P26583	HMGB2	4.22569	6.83995	6	28.8631	28.7343	29.9507	22.3427	22.3427	22.3427
P54709	ATP1B3	5.93001	6.94979	6	29.0436	29.2839	29.5502	22.3427	22.3427	22.3427
P42166	TMPO	6.6532	6.95555	6	29.1337	29.468	29.2932	22.3427	22.3427	22.3427
P39748	FEN1	5.58867	6.99737	6	29.451	29.5801	28.9892	22.3427	22.3427	22.3427
P67936	TPM4	3.67781	7.12324	6	29.0654	30.1322	30.3543	22.3427	22.3427	23.4967
P40429	RPL13A	4.1107	7.39834	6	29.6012	30.5743	29.0478	22.3427	22.3427	22.3427
P36542	ATP5F1C	7.60041	7.46818	6	29.7917	29.7178	29.9232	22.3427	22.3427	22.3427
P30048	PRDX3	6.26335	7.49342	6	29.576	29.9736	29.9589	22.3427	22.3427	22.3427
P28066	PSMA5	8.17941	7.52054	6	29.9234	29.8874	29.7791	22.3427	22.3427	22.3427
Q92688	ANP32B	8.29583	7.5563	6	29.9805	29.8565	29.8602	22.3427	22.3427	22.3427
P09429	HMGB1	7.87863	7.84545	6	30.1746	30.2874	30.1026	22.3427	22.3427	22.3427
P09972	ALDOC	8.32849	7.84979	6	30.1865	30.2673	30.1239	22.3427	22.3427	22.3427
P61353	RPL27	4.66772	7.9505	6	29.621	30.7785	30.4803	22.3427	22.3427	22.3427
P38159	RBMX	6.62546	8.06524	6	30.257	30.6308	30.3362	22.3427	22.3427	22.3427
P48047	ATP5PO	5.20907	8.08729	6	29.9311	30.5649	30.794	22.3427	22.3427	22.3427
P50502	ST13	6.91897	8.16566	6	30.6958	30.3696	30.4598	22.3427	22.3427	22.3427
P16949	STMN1	7.0357	8.21236	6	30.4734	30.4542	30.7376	22.3427	22.3427	22.3427
P63241	EIF5A	6.45079	8.42073	6	30.9737	30.5221	30.7947	22.3427	22.3427	22.3427
P62753	RPS6	7.01428	8.5815	6	31.0494	30.7339	30.9894	22.3427	22.3427	22.3427
P83731	RPL24	6.18488	8.75105	6	31.3045	31.1948	30.7821	22.3427	22.3427	22.3427
Q8WUH6	TMEM263	4.76336	8.77491	6	31.3897	31.5633	30.4	22.3427	22.3427	22.3427
P39019	RPS19	6.1206	8.82068	6	31.2361	31.4083	30.8459	22.3427	22.3427	22.3427
P09211	GSTP1	2.69693	9.03708	6	32.6653	32.6947	32.5618	22.3427	22.3427	26.1251
P24534	EEF1B2	7.8113	9.31047	6	31.7847	31.6028	31.5722	22.3427	22.3427	22.3427
P09382	LGALS1	6.94014	9.44844	6	31.8756	31.9271	31.5709	22.3427	22.3427	22.3427
P31943	HNRNPH1	7.83311	9.67534	6	31.904	32.0109	32.1394	22.3427	22.3427	22.3427
P49748	ACADVL	2.01943	1.82354	7	27.9615	27.9529	28.17	26.3222	25.4876	26.8039
P62979	RPS27A	3.94228	2.34045	7	31.9848	32.4278	32.3488	30.0104	29.9642	29.7655
O00154	ACOT7	2.8028	2.76022	7	29.5988	28.4648	29.2151	26.6123	26.1929	26.1929
P62917	RPL8	3.32133	3.17874	7	30.4964	30.2477	29.5572	26.9526	27.1089	26.7036
Q16181	SEPTIN7	2.21901	3.44783	7	26.4475	24.4924	26.4319	22.3427	22.3427	22.3427
P36871	PGM1	4.94894	3.58622	7	25.9814	25.6769	26.1286	22.3427	22.3427	22.3427
Q9BUJ2	HNRNPUL1	2.3658	3.83166	7	24.8705	26.9672	26.6855	22.3427	22.3427	22.3427
P31947	SFN	3.78191	3.96735	7	29.2108	29.9556	29.8417	26.014	25.4109	25.6812
Q13618	CUL3	2.41449	4.34651	7	25.2451	27.4672	27.3555	22.3427	22.3427	22.3427
P19367	HK1	4.01799	4.3487	7	27.2389	26.346	26.4894	22.3427	22.3427	22.3427
P35606	COPB2	2.13146	4.36483	7	27.7416	26.8041	27.9593	22.3427	22.3427	24.725
Q96HC4	PDLIM5	3.10243	4.42832	7	26.261	26.3143	27.7379	22.3427	22.3427	22.3427
P11766	ADH5	2.93466	4.60573	7	26.8326	27.9649	26.048	22.3427	22.3427	22.3427
Q9UN86	G3BP2	3.51077	4.60981	7	26.2585	27.6267	26.9726	22.3427	22.3427	22.3427
Q9NPH2	ISYNA1	3.81196	4.65846	7	26.8425	27.6434	26.5177	22.3427	22.3427	22.3427
P16144	ITGB4	5.84483	4.81092	7	26.9457	27.2965	27.2188	22.3427	22.3427	22.3427
O43818	RRP9	4.29528	4.85014	7	27.688	27.0978	26.7929	22.3427	22.3427	22.3427
Q16795	NDUFA9	3.54489	5.14669	7	28.1686	27.6132	26.6865	22.3427	22.3427	22.3427
O75534	CSDE1	4.78635	5.25039	7	27.6531	27.9301	27.1963	22.3427	22.3427	22.3427
P55265	ADAR	4.12837	5.26725	7	27.0975	28.1818	27.5507	22.3427	22.3427	22.3427
O94826	TOMM70	3.94356	5.30144	7	28.2902	27.5657	27.0767	22.3427	22.3427	22.3427
P13798	APEH	5.22014	5.34622	7	28.0277	27.5065	27.5328	22.3427	22.3427	22.3427
Q14157	UBAP2L	4.29066	5.44108	7	28.1216	28.035	27.1949	22.3427	22.3427	22.3427
P60228	EIF3E	3.82595	5.47675	7	27.9078	27.1041	28.4466	22.3427	22.3427	22.3427
P23921	RRM1	5.78048	5.47869	7	27.8376	28.0307	27.5961	22.3427	22.3427	22.3427
P47897	QARS1	3.95958	5.51906	7	28.4496	27.9385	27.1973	22.3427	22.3427	22.3427
Q9NSE4	IARS2	4.13254	5.5595	7	27.422	27.7477	28.5371	22.3427	22.3427	22.3427
P38117	ETFB	4.38214	5.58849	7	28.3807	27.395	28.018	22.3427	22.3427	22.3427
O43396	TXNL1	5.60332	5.59084	7	28.0965	28.0538	27.6505	22.3427	22.3427	22.3427
P00492	HPRT1	3.80436	5.69934	7	27.666	28.8633	27.597	22.3427	22.3427	22.3427
Q14247	CTTN	4.97247	5.7092	7	27.6751	28.0844	28.3964	22.3427	22.3427	22.3427
P11216	PYGB	5.18021	5.72026	7	28.3516	27.7165	28.1209	22.3427	22.3427	22.3427
Q13347	EIF3I	5.45793	5.73091	7	28.0732	27.7995	28.3482	22.3427	22.3427	22.3427
Q8IY81	FTSJ3	6.47904	5.81042	7	28.3273	28.0992	28.033	22.3427	22.3427	22.3427
P12081	HARS1	3.88911	5.84978	7	28.9704	27.9762	27.631	22.3427	22.3427	22.3427
P35659	DEK	6.48038	5.85442	7	28.3201	28.249	28.0224	22.3427	22.3427	22.3427
O75083	WDR1	5.36904	5.90304	7	28.5852	28.0303	28.1218	22.3427	22.3427	22.3427
Q8NEV1	CSNK2A3	3.77675	5.9108	7	27.8837	29.1172	27.7598	22.3427	22.3427	22.3427
P49915	GMPS	2.8842	5.94854	7	27.5073	27.5945	29.7721	22.3427	22.3427	22.3427
P45974	USP5	5.61236	5.98857	7	28.5816	28.0585	28.3538	22.3427	22.3427	22.3427
P26196	DDX6	5.3202	6.01142	7	28.2069	28.7121	28.1435	22.3427	22.3427	22.3427
P20042	EIF2S2	4.80617	6.01626	7	27.9347	28.774	28.3683	22.3427	22.3427	22.3427
O00232	PSMD12	5.31003	6.02472	7	28.6725	28.3849	28.045	22.3427	22.3427	22.3427
P61289	PSME3	4.24339	6.14673	7	28.253	29.1657	28.0498	22.3427	22.3427	22.3427
P62249	RPS16	6.29403	6.21738	7	31.1894	31.5211	31.4869	25.1689	25.2075	25.1689
P55036	PSMD4	9.70646	6.25889	7	28.6315	28.5892	28.5842	22.3427	22.3427	22.3427
P23381	WARS1	5.05332	6.2654	7	28.5734	28.2478	29.0033	22.3427	22.3427	22.3427
P62333	PSMC6	5.48981	6.30669	7	28.3113	28.8646	28.7724	22.3427	22.3427	22.3427
P31153	MAT2A	3.63528	6.30762	7	29.0917	28.486	29.5584	23.5278	22.3427	22.3427
O75874	IDH1	6.8003	6.4538	7	28.9273	28.8178	28.6446	22.3427	22.3427	22.3427
Q9UHD8	SEPTIN9	6.0887	6.47133	7	29.0326	28.6021	28.8076	22.3427	22.3427	22.3427
O75947	ATP5PD	3.99468	6.50177	7	29.4033	29.1073	28.023	22.3427	22.3427	22.3427
O15372	EIF3H	4.15936	6.50544	7	29.6082	28.5243	28.412	22.3427	22.3427	22.3427
P47895	ALDH1A3	5.49069	6.53609	7	29.0265	28.5259	29.0841	22.3427	22.3427	22.3427
P00387	CYB5R3	4.86787	6.56514	7	29.3352	28.9359	28.4526	22.3427	22.3427	22.3427
Q7L1Q6	BZW1	6.52755	6.56672	7	28.9263	28.732	29.0701	22.3427	22.3427	22.3427
P32322	PYCR1	4.55258	6.57455	7	29.0241	28.3407	29.3871	22.3427	22.3427	22.3427
P14923	JUP	4.63565	6.57812	7	29.2711	29.1515	28.34	22.3427	22.3427	22.3427
P23528	CFL1	4.65343	6.60351	7	32.8496	32.93	32.8887	26.8653	25.9963	25.9963
P18754	RCC1	7.06369	6.61983	7	28.9235	28.8612	29.1031	22.3427	22.3427	22.3427
Q8NBS9	TXNDC5	4.61469	6.62577	7	29.4114	28.4012	29.0929	22.3427	22.3427	22.3427
P35613	BSG	7.03605	6.62939	7	28.8366	28.9894	29.0904	22.3427	22.3427	22.3427
P49321	NASP	5.02978	6.73123	7	29.1875	28.6165	29.418	22.3427	22.3427	22.3427
Q16543	CDC37	6.4249	6.73473	7	28.8843	29.0961	29.2521	22.3427	22.3427	22.3427
P63010	AP2B1	4.87213	6.93331	7	29.0088	29.0057	29.8137	22.3427	22.3427	22.3427
P18621	RPL17	3.4351	7.25344	7	29.7328	30.0864	30.7177	22.3427	24.091	22.3427
P84098	RPL19	3.69518	7.25563	7	30.5946	29.6779	30.5303	22.5387	22.5387	23.9585
P46782	RPS5	2.16612	7.25931	7	31.2975	30.8262	30.902	22.3427	22.3427	26.5623
P62316	SNRPD2	6.43304	7.39397	7	29.6684	29.9638	29.578	22.3427	22.3427	22.3427
P50395	GDI2	6.47002	7.6479	7	30.1955	29.787	29.9894	22.3427	22.3427	22.3427
P52597	HNRNPF	3.70398	7.67	7	30.4258	30.6176	30.7342	24.0822	22.3427	22.3427
P32119	PRDX2	3.17723	7.68371	7	30.8756	31.0258	30.5481	24.7129	22.3427	22.3427
P61088	UBE2N	5.26635	7.79174	7	29.7635	30.5852	30.0548	22.3427	22.3427	22.3427
P39687	ANP32A	6.73413	7.84243	7	30.3779	30.0217	30.1559	22.3427	22.3427	22.3427
P32969	RPL9	6.63109	8.05022	7	30.3749	30.5973	30.2066	22.3427	22.3427	22.3427
P62280	RPS11	5.71484	8.13431	7	30.7587	30.5669	30.1055	22.3427	22.3427	22.3427
P52565	ARHGDIA	6.73797	8.16504	7	30.3149	30.6881	30.5203	22.3427	22.3427	22.3427
P62906	RPL10A	6.22986	8.284	7	30.8454	30.687	30.3479	22.3427	22.3427	22.3427
Q01469	FABP5	6.62665	8.42757	7	30.8242	30.5431	30.9437	22.3427	22.3427	22.3427
P62750	RPL23A	5.51038	8.49794	7	30.9047	31.1995	30.4179	22.3427	22.3427	22.3427
P62829	RPL23	10.0223	8.86226	7	31.2324	31.2107	31.1719	22.3427	22.3427	22.3427
P26373	RPL13	8.6222	9.22315	7	31.4967	31.6392	31.5618	22.3427	22.3427	22.3427
Q07020	RPL18	8.86783	9.31859	7	31.7335	31.6223	31.6282	22.3427	22.3427	22.3427
Q07021	C1QBP	7.70604	9.55045	7	31.8464	31.7981	32.035	22.3427	22.3427	22.3427
P61604	HSPE1	7.50203	9.97093	7	32.3855	32.411	32.1446	22.3427	22.3427	22.3427
P05387	RPLP2	7.90816	10.7062	7	33.1215	33.1206	32.9047	22.3427	22.3427	22.3427
Q15907	RAB11B	3.41476	4.46964	8	29.3403	29.3997	30.5234	25.1573	25.5399	25.1573
P04040	CAT	3.42112	4.59552	8	27.6384	26.9752	26.2012	22.3427	22.3427	22.3427
P30086	PEBP1	5.55165	4.73211	8	30.8305	30.683	30.4165	25.9631	25.8852	25.8852
Q15019	SEPTIN2	3.75836	4.79202	8	27.2085	26.4862	27.7096	22.3427	22.3427	22.3427
Q14690	PDCD11	3.76006	4.80668	8	26.4721	27.6771	27.2991	22.3427	22.3427	22.3427
P33176	KIF5B	3.19146	4.81506	8	28.0948	26.9851	26.3935	22.3427	22.3427	22.3427
Q9NVP1	DDX18	2.18086	4.81688	8	28.2534	27.9143	25.3112	22.3427	22.3427	22.3427
Q9Y678	COPG1	5.20519	4.95072	8	26.9945	27.3525	27.5334	22.3427	22.3427	22.3427
P14735	IDE	5.288	5.00158	8	27.6475	27.1638	27.2218	22.3427	22.3427	22.3427
Q9BXP5	SRRT	3.0235	5.04793	8	28.4631	27.2283	26.4806	22.3427	22.3427	22.3427
P27635	RPL10	3.50567	5.09094	8	30.7569	30.2984	29.8917	25.0483	25.9162	24.7097
Q6ZMU5	TRIM72	3.94085	5.09275	8	26.7575	27.7581	27.7909	22.3427	22.3427	22.3427
Q9UHX1	PUF60	3.0346	5.4317	8	26.8844	28.9618	27.4772	22.3427	22.3427	22.3427
Q96KP4	CNDP2	4.53002	5.47847	8	27.3084	28.1401	28.0152	22.3427	22.3427	22.3427
P17655	CAPN2	5.82873	5.52923	8	27.8428	27.6743	28.0988	22.3427	22.3427	22.3427
P05455	SSB	5.24607	5.66869	8	27.6583	28.1655	28.2105	22.3427	22.3427	22.3427
Q9UBQ7	GRHPR	4.61687	5.83414	8	28.5945	27.6933	28.2429	22.3427	22.3427	22.3427
Q9UMS4	PRPF19	5.87786	5.93711	8	28.0225	28.4187	28.3984	22.3427	22.3427	22.3427
Q92598	HSPH1	5.43025	5.99504	8	28.039	28.6217	28.3527	22.3427	22.3427	22.3427
O43809	NUDT21	3.91822	6.0556	8	27.6793	28.4215	29.0943	22.3427	22.3427	22.3427
P52292	KPNA2	5.20629	6.06423	8	28.7629	28.096	28.3621	22.3427	22.3427	22.3427
Q9UJZ1	STOML2	4.27239	6.11776	8	27.789	28.8084	28.7841	22.3427	22.3427	22.3427
P60660	MYL6	4.15959	6.25204	8	30.687	30.6331	29.8585	24.6416	23.8905	23.8905
Q02543	RPL18A	5.57944	6.34019	8	30.4454	30.3878	30.3518	23.7823	24.0423	24.3399
P27348	YWHAQ	3.96106	6.34821	8	29.7536	30.5163	30.721	23.5562	23.8377	24.5524
O43852	CALU	5.33028	6.44019	8	29.0827	28.8398	28.4263	22.3427	22.3427	22.3427
P78417	GSTO1	6.00575	6.49175	8	28.6145	28.8218	29.0672	22.3427	22.3427	22.3427
P46779	RPL28	4.01328	6.51798	8	28.5281	28.3664	29.6876	22.3427	22.3427	22.3427
Q9HB71	CACYBP	6.61563	6.54106	8	28.9087	29.0306	28.7122	22.3427	22.3427	22.3427
P54886	ALDH18A1	5.89845	6.9003	8	29.3891	28.9472	29.3929	22.3427	22.3427	22.3427
P28074	PSMB5	5.98987	6.90599	8	29.3982	28.968	29.38	22.3427	22.3427	22.3427
Q07955	SRSF1	7.08816	6.95683	8	29.3377	29.4064	29.1546	22.3427	22.3427	22.3427
P05198	EIF2S1	5.35736	6.96733	8	29.6623	28.9553	29.3127	22.3427	22.3427	22.3427
P39656	DDOST	5.6169	7.07156	8	29.7666	29.2865	29.1899	22.3427	22.3427	22.3427
Q04760	GLO1	5.38697	7.33898	8	29.9708	29.8043	29.2702	22.3427	22.3427	22.3427
P54727	RAD23B	5.12195	7.37767	8	29.7726	29.2679	30.1208	22.3427	22.3427	22.3427
O75367	MACROH2A1	7.57467	7.38344	8	29.8437	29.6907	29.6442	22.3427	22.3427	22.3427
O75131	CPNE3	6.62026	7.43787	8	29.9098	29.5722	29.8598	22.3427	22.3427	22.3427
Q00325	SLC25A3	3.85061	7.50055	8	30.3211	30.3664	30.4197	22.3427	23.9201	22.3427
P60900	PSMA6	6.34045	7.50478	8	29.8382	30.068	29.6364	22.3427	22.3427	22.3427
Q9Y266	NUDC	7.49432	7.59397	8	30.0159	29.9863	29.808	22.3427	22.3427	22.3427
P62081	RPS7	4.71713	7.59976	8	30.3828	30.1301	29.3146	22.3427	22.3427	22.3427
Q15365	PCBP1	3.12188	7.61719	8	31.0855	30.1132	30.9701	22.3427	24.6317	22.3427
Q13283	G3BP1	7.76637	7.68621	8	29.9237	30.0477	30.1156	22.3427	22.3427	22.3427
Q13151	HNRNPA0	5.24265	7.79476	8	29.7054	30.5498	30.1574	22.3427	22.3427	22.3427
Q14103	HNRNPD	2.76436	7.97271	8	31.1197	31.502	31.5054	22.3427	25.5234	22.3427
O14818	PSMA7	7.57436	8.07322	8	30.5242	30.427	30.2967	22.3427	22.3427	22.3427
P00505	GOT2	6.79937	8.07629	8	30.5003	30.2144	30.5424	22.3427	22.3427	22.3427
P30041	PRDX6	7.62563	8.13405	8	30.5707	30.5064	30.3533	22.3427	22.3427	22.3427
Q99497	PARK7	5.25564	8.13896	8	30.8802	30.552	30.0129	22.3427	22.3427	22.3427
P0DP25	CALM3	8.15063	9.97794	8	32.2336	32.4318	32.2967	22.3427	22.3427	22.3427
P62826	RAN	6.80416	9.97869	8	32.1092	32.5483	32.3068	22.3427	22.3427	22.3427
P15924	DSP	2.67603	3.90119	9	25.6924	27.3471	25.6924	22.3427	22.3427	22.3427
P55209	NAP1L1	4.62976	4.72942	9	31.2326	30.9193	30.6248	26.079	26.4304	26.079
Q9BQG0	MYBBP1A	4.04633	4.89279	9	26.7925	27.0904	27.8237	22.3427	22.3427	22.3427
P09525	ANXA4	7.99809	4.96608	9	27.2936	27.263	27.3699	22.3427	22.3427	22.3427
Q9UQ35	SRRM2	4.89008	5.07367	9	27.0955	27.7678	27.386	22.3427	22.3427	22.3427
Q9H0A0	NAT10	5.03786	5.10678	9	27.8056	27.3161	27.2268	22.3427	22.3427	22.3427
Q9P2E9	RRBP1	5.56435	5.12138	9	27.612	27.1985	27.582	22.3427	22.3427	22.3427
P78347	GTF2I	6.28947	5.24819	9	27.4586	27.5519	27.7623	22.3427	22.3427	22.3427
P49591	SARS1	3.74778	5.26221	9	27.2126	27.2126	28.3896	22.3427	22.3427	22.3427
Q7L014	DDX46	4.62794	5.47815	9	27.4285	27.764	28.2702	22.3427	22.3427	22.3427
O95373	IPO7	2.74451	5.48211	9	28.6526	26.3417	28.4804	22.3427	22.3427	22.3427
P46013	MKI67	2.94217	5.59321	9	28.3877	28.8075	26.6127	22.3427	22.3427	22.3427
O60841	EIF5B	6.34999	5.70291	9	28.1932	28.0734	27.8703	22.3427	22.3427	22.3427
P61158	ACTR3	5.10619	5.74404	9	28.3017	27.6985	28.2602	22.3427	22.3427	22.3427
P24752	ACAT1	3.13089	5.82663	9	28.7592	26.9188	28.8301	22.3427	22.3427	22.3427
P69849	NOMO3	5.66783	5.96417	9	28.0264	28.3765	28.5178	22.3427	22.3427	22.3427
O60701	UGDH	5.94244	6.06625	9	28.3308	28.657	28.2392	22.3427	22.3427	22.3427
P15880	RPS2	5.18577	6.17046	9	31.3929	31.4677	31.5202	25.6729	25.0254	25.1711
P28331	NDUFS1	5.47472	6.20079	9	28.2425	28.8299	28.5582	22.3427	22.3427	22.3427
Q99714	HSD17B10	3.76182	6.20355	9	28.2613	29.4441	27.9335	22.3427	22.3427	22.3427
Q8N163	CCAR2	6.61753	6.328	9	28.4926	28.7769	28.7428	22.3427	22.3427	22.3427
Q16643	DBN1	4.75018	6.34895	9	28.3305	28.5384	29.2062	22.3427	22.3427	22.3427
O43143	DHX15	5.43016	6.35043	9	28.5264	29.0496	28.5035	22.3427	22.3427	22.3427
Q9NVI7	ATAD3A	4.17146	6.35597	9	29.0659	29.0715	27.9587	22.3427	22.3427	22.3427
Q9UNM6	PSMD13	4.65803	6.40113	9	28.5577	29.2961	28.3778	22.3427	22.3427	22.3427
P43686	PSMC4	5.3989	6.48684	9	29.1583	28.8142	28.5162	22.3427	22.3427	22.3427
P51149	RAB7A	2.38668	6.51247	9	29.4025	30.0878	30.2831	22.3427	25.5505	22.3427
P47756	CAPZB	5.54729	6.58339	9	28.8595	28.6658	29.2532	22.3427	22.3427	22.3427
Q99536	VAT1	6.37092	6.70076	9	29.2304	29.0486	28.8515	22.3427	22.3427	22.3427
P52209	PGD	2.59268	6.73897	9	29.8044	30.237	30.1847	22.3427	25.3236	22.3427
P31930	UQCRC1	7.35229	6.87869	9	29.0975	29.3097	29.2572	22.3427	22.3427	22.3427
Q96AG4	LRRC59	3.70221	6.89034	9	31.3743	31.7568	31.2786	24.0725	24.0725	25.5936
P22695	UQCRC2	4.48642	6.93678	9	29.2993	29.8518	28.6874	22.3427	22.3427	22.3427
Q08945	SSRP1	6.45393	6.97332	9	29.149	29.5196	29.2796	22.3427	22.3427	22.3427
P41250	GARS1	4.6665	7.11036	9	28.8838	29.9527	29.5229	22.3427	22.3427	22.3427
Q92945	KHSRP	5.68061	7.69928	9	30.3079	29.6809	30.1372	22.3427	22.3427	22.3427
P62269	RPS18	4.87226	7.71671	9	30.4972	30.1938	29.4873	22.3427	22.3427	22.3427
Q15181	PPA1	10.8235	8.3097	9	30.673	30.6387	30.6457	22.3427	22.3427	22.3427
O96008	TOMM40	7.29316	8.38242	9	30.7819	30.5664	30.8272	22.3427	22.3427	22.3427
Q9Y277	VDAC3	6.27563	8.44566	9	30.534	31.0386	30.7927	22.3427	22.3427	22.3427
P61313	RPL15	5.58672	8.49178	9	30.4331	31.1822	30.8883	22.3427	22.3427	22.3427
P29692	EEF1D	5.12913	8.74361	9	31.4288	30.505	31.3253	22.3427	22.3427	22.3427
P23284	PPIB	5.76242	8.92655	9	30.9499	31.2009	31.6571	22.3427	22.3427	22.3427
Q02878	RPL6	5.26466	9.01361	9	31.7677	30.8253	31.4761	22.3427	22.3427	22.3427
P18124	RPL7	5.87296	9.02385	9	31.754	31.1177	31.2281	22.3427	22.3427	22.3427
P18669	PGAM1	7.44347	9.24611	9	31.5878	31.4484	31.7304	22.3427	22.3427	22.3427
P62277	RPS13	7.56458	9.53993	9	32.0182	31.7469	31.883	22.3427	22.3427	22.3427
Q07065	CKAP4	2.95347	2.46283	10	28.0621	27.4462	28.0799	25.1923	25.8152	25.1923
Q06830	PRDX1	4.14043	3.86295	10	34.2897	34.3892	34.6576	30.3053	30.4693	30.973
P62910	RPL32	6.1324	4.55396	10	29.9447	29.8623	30.1379	25.4772	25.403	25.403
P07737	PFN1	5.17149	5.31198	10	33.3436	33.2478	33.3303	27.9693	27.7136	28.3029
P04792	HSPB1	6.03002	5.4752	10	31.4315	31.3857	31.1211	25.9336	25.8124	25.7667
Q8N1F7	NUP93	6.48992	5.56068	10	27.83	28.0725	27.8078	22.3427	22.3427	22.3427
Q6UB35	MTHFD1L	3.19502	5.68222	10	28.6188	26.8505	28.6056	22.3427	22.3427	22.3427
Q96QK1	VPS35	5.89755	5.71093	10	27.8209	28.1041	28.2361	22.3427	22.3427	22.3427
P49419	ALDH7A1	4.70201	5.79651	10	28.406	27.6438	28.368	22.3427	22.3427	22.3427
P46060	RANGAP1	4.61711	5.80012	10	28.6357	28.0437	27.7492	22.3427	22.3427	22.3427
P36776	LONP1	6.04678	6.04937	10	28.5189	28.5033	28.1542	22.3427	22.3427	22.3427
Q15046	KARS1	5.71246	6.18159	10	28.6565	28.6867	28.2298	22.3427	22.3427	22.3427
Q9Y3I0	RTCB	5.21436	6.19419	10	28.7656	28.7006	28.1446	22.3427	22.3427	22.3427
Q14566	MCM6	5.20206	6.43255	10	28.365	29.0149	28.946	22.3427	22.3427	22.3427
P26038	MSN	5.74761	6.59919	10	28.8046	28.7712	29.25	22.3427	22.3427	22.3427
Q00796	SORD	6.47401	6.78281	10	29.1046	29.3159	28.9562	22.3427	22.3427	22.3427
P33993	MCM7	5.79428	6.79252	10	29.0324	28.9341	29.4393	22.3427	22.3427	22.3427
O76021	RSL1D1	5.11147	6.95574	10	29.6126	29.4439	28.839	22.3427	22.3427	22.3427
P62937	PPIA	3.69707	7.06959	10	33.6735	33.9417	33.9505	26.3278	26.1764	27.8528
Q9Y4L1	HYOU1	7.18075	7.22211	10	29.6311	29.4172	29.6463	22.3427	22.3427	22.3427
Q01518	CAP1	7.59486	7.24656	10	29.4742	29.6649	29.6288	22.3427	22.3427	22.3427
O43776	NARS1	6.46629	7.30159	10	29.8647	29.4921	29.5762	22.3427	22.3427	22.3427
P09960	LTA4H	6.82872	7.44175	10	29.6643	29.9683	29.7209	22.3427	22.3427	22.3427
O60664	PLIN3	5.67967	7.4602	10	29.811	29.4847	30.1131	22.3427	22.3427	22.3427
P51991	HNRNPA3	2.81878	7.55018	10	30.9569	30.9128	30.7373	22.3427	22.3427	25.271
Q06323	PSME1	6.38547	7.58276	10	29.805	30.1711	29.8005	22.3427	22.3427	22.3427
P04181	OAT	9.19756	7.65067	10	30.0384	29.9879	29.9539	22.3427	22.3427	22.3427
Q13126	MTAP	5.07801	7.71055	10	29.5338	30.4074	30.2187	22.3427	22.3427	22.3427
P37837	TALDO1	5.82653	7.88346	10	30.0874	30.5761	30.0152	22.3427	22.3427	22.3427
Q9NUJ1	ABHD10	5.96979	7.9908	10	30.6449	30.2695	30.0863	22.3427	22.3427	22.3427
O75390	CS	4.91962	7.99793	10	30.505	30.7613	29.7557	22.3427	22.3427	22.3427
P35232	PHB1	10.84	9.28804	10	31.6417	31.643	31.6077	22.3427	22.3427	22.3427
P05388	RPLP0	3.89675	9.33615	10	32.2508	32.3121	32.3841	24.2531	22.3427	22.3427
P62241	RPS8	9.6375	9.71807	10	32.0346	32.1091	32.0388	22.3427	22.3427	22.3427
P62805	H4C1	2.26288	11.5463	10	36.2514	35.7073	36.2157	22.4056	22.4056	28.7242
Q01082	SPTBN1	6.07989	3.94694	11	26.1543	26.418	26.2968	22.3427	22.3427	22.3427
P51659	HSD17B4	5.20451	4.58789	11	30.0217	30.4908	30.3491	25.6097	25.7709	25.7173
P43304	GPD2	3.45378	4.59644	11	26.757	26.3425	27.7181	22.3427	22.3427	22.3427
P46459	NSF	3.91227	4.60228	11	26.4463	27.5182	26.8706	22.3427	22.3427	22.3427
P68104	EEF1A1	5.26831	5.29666	11	35.547	35.5002	35.3067	30.0608	30.4408	29.9624
P17980	PSMC3	6.68307	6.45377	11	28.6602	28.7682	28.9612	22.3427	22.3427	22.3427
P30153	PPP2R1A	5.84887	6.57943	11	29.2014	28.8515	28.7137	22.3427	22.3427	22.3427
Q13435	SF3B2	5.29754	6.57997	11	29.3217	28.719	28.7275	22.3427	22.3427	22.3427
P14314	PRKCSH	2.66034	6.89597	11	29.6932	30.6092	30.2565	25.1855	22.3427	22.3427
Q15393	SF3B3	6.50815	6.89834	11	29.3163	29.3716	29.0354	22.3427	22.3427	22.3427
Q5SSJ5	HP1BP3	6.11763	7.01998	11	29.6258	29.2014	29.2611	22.3427	22.3427	22.3427
P41091	EIF2S3	6.55206	7.0931	11	29.4778	29.2379	29.5919	22.3427	22.3427	22.3427
P22087	FBL	4.75173	7.32523	11	29.9517	29.0594	29.9928	22.3427	22.3427	22.3427
P26599	PTBP1	3.53515	7.34937	11	31.7097	31.7604	31.3871	25.4893	23.6599	23.6599
Q16531	DDB1	6.89805	7.35004	11	29.5284	29.7178	29.8322	22.3427	22.3427	22.3427
O43390	HNRNPR	5.18819	7.69043	11	30.4997	29.6521	29.9477	22.3427	22.3427	22.3427
P23526	AHCY	3.34575	7.8275	11	31.1117	30.8079	30.7877	22.3427	24.5392	22.3427
P17844	DDX5	4.80924	7.9466	11	30.3448	29.7103	30.813	22.3427	22.3427	22.3427
Q92841	DDX17	5.47527	8.15866	11	30.7846	30.0608	30.6587	22.3427	22.3427	22.3427
P12429	ANXA3	7.24799	8.3724	11	30.8765	30.6047	30.6642	22.3427	22.3427	22.3427
P40925	MDH1	8.92064	8.68214	11	30.9596	31.0558	31.0592	22.3427	22.3427	22.3427
P63104	YWHAZ	6.7705	8.84221	11	32.6607	32.8473	33.0414	24.0731	23.9748	23.9748
P45880	VDAC2	2.52419	8.94535	11	32.583	32.6938	32.7519	22.3427	22.3427	26.5071
P46781	RPS9	7.31824	9.02449	11	31.1965	31.4513	31.454	22.3427	22.3427	22.3427
P12277	CKB	6.66539	9.52835	11	32.0921	31.6378	31.8834	22.3427	22.3427	22.3427
P12004	PCNA	7.53923	9.55634	11	32.0095	31.9433	31.7445	22.3427	22.3427	22.3427
P07910	HNRNPC	5.93728	9.95822	11	32.1915	32.7046	32.0067	22.3427	22.3427	22.3427
Q14980	NUMA1	3.08703	5.07231	12	28.5279	26.9533	26.764	22.3427	22.3427	22.3427
Q86XP3	DDX42	4.91325	5.18583	12	27.1584	27.6003	27.827	22.3427	22.3427	22.3427
Q9NZM1	MYOF	4.75652	5.48891	12	28.0594	28.059	27.3766	22.3427	22.3427	22.3427
P48147	PREP	5.55405	5.55835	12	27.6151	27.999	28.0892	22.3427	22.3427	22.3427
Q99623	PHB2	4.71991	5.7305	12	31.7506	31.3153	31.1527	25.399	25.6603	25.9678
Q8N392	ARHGAP18	6.88222	5.85053	12	28.2737	28.2547	28.0514	22.3427	22.3427	22.3427
P63244	RACK1	4.73125	5.92407	12	30.9944	31.1576	31.341	25.6967	25.0121	25.0121
P56192	MARS1	3.92062	5.93642	12	27.754	28.0191	29.0645	22.3427	22.3427	22.3427
O43242	PSMD3	2.23849	5.9717	12	29.4618	29.3201	29.4886	25.6699	22.3427	22.3427
P16615	ATP2A2	4.74597	6.03386	12	28.1154	28.1346	28.8798	22.3427	22.3427	22.3427
Q9Y262	EIF3L	6.78322	6.17573	12	28.5369	28.3725	28.6461	22.3427	22.3427	22.3427
P36551	CPOX	3.20896	6.19772	12	31.5327	31.5664	31.1636	24.6012	24.6012	26.4671
P12270	TPR	5.2443	6.36445	12	28.3093	28.912	28.9003	22.3427	22.3427	22.3427
P33991	MCM4	7.92549	6.6046	12	28.9586	29.0174	28.8661	22.3427	22.3427	22.3427
Q9Y3F4	STRAP	7.03437	6.71129	12	29.1649	29.0856	28.9117	22.3427	22.3427	22.3427
Q02790	FKBP4	5.85857	6.98925	12	29.063	29.3391	29.5939	22.3427	22.3427	22.3427
P06748	NPM1	3.13773	7.04582	12	33.2193	33.1405	33.0224	26.0007	27.4214	24.8226
P61221	ABCE1	6.21868	7.14087	12	29.3246	29.3909	29.7353	22.3427	22.3427	22.3427
O00231	PSMD11	5.08836	7.36413	12	29.513	29.401	30.2066	22.3427	22.3427	22.3427
P17174	GOT1	6.16205	7.66339	12	29.7255	30.173	30.1199	22.3427	22.3427	22.3427
Q8NC51	SERBP1	3.3486	7.6639	12	30.8513	30.9033	30.3746	24.452	22.3427	22.3427
P62195	PSMC5	7.0114	7.6801	12	30.1604	30.0456	29.8626	22.3427	22.3427	22.3427
Q12931	TRAP1	2.88974	7.68304	12	30.9882	30.9273	31.0217	25.2025	22.3427	22.3427
Q9Y5B9	SUPT16H	8.20659	7.76669	12	30.1632	30.1431	30.0221	22.3427	22.3427	22.3427
P08865	RPSA	3.44996	7.79667	12	32.6602	32.5216	32.5371	24.085	26.1588	24.085
Q12905	ILF2	5.54974	8.9049	12	31.6138	30.8137	31.3154	22.3427	22.3427	22.3427
P27797	CALR	7.70837	8.92448	12	31.2843	31.1428	31.3746	22.3427	22.3427	22.3427
O00299	CLIC1	9.08146	9.33255	12	31.7313	31.6741	31.6205	22.3427	22.3427	22.3427
Q9P2J5	LARS1	4.05531	3.29828	13	28.7199	29.423	29.1168	25.7603	25.7603	25.8442
P08195	SLC3A2	4.65409	3.78486	13	30.4959	30.0705	30.2944	26.3897	26.7268	26.3897
Q99613	EIF3C	4.19122	5.50831	13	28.4069	27.309	27.8373	22.3427	22.3427	22.3427
P53621	COPA	6.5538	5.88848	13	28.3805	28.2323	28.0808	22.3427	22.3427	22.3427
Q6P2Q9	PRPF8	5.35628	6.19957	13	28.1919	28.801	28.634	22.3427	22.3427	22.3427
Q8WUM4	PDCD6IP	4.56616	6.24796	13	28.5638	28.1038	29.1045	22.3427	22.3427	22.3427
P08133	ANXA6	5.07293	6.5019	13	29.2378	28.8357	28.4605	22.3427	22.3427	22.3427
Q14126	DSG2	3.23546	6.57747	13	30.2446	28.3325	28.1836	22.3427	22.3427	22.3427
P12814	ACTN1	5.91097	6.67941	13	29.0368	28.7689	29.2608	22.3427	22.3427	22.3427
Q16891	IMMT	4.61206	6.70427	13	29.6513	28.7557	28.7341	22.3427	22.3427	22.3427
Q99460	PSMD1	6.07481	6.77271	13	28.865	29.1733	29.3081	22.3427	22.3427	22.3427
P62701	RPS4X	3.99997	6.79728	13	31.8674	31.9554	32.1551	24.6548	24.8886	26.0425
Q15029	EFTUD2	6.21094	6.82348	13	28.9566	29.1624	29.3797	22.3427	22.3427	22.3427
P25205	MCM3	5.23153	6.83699	13	28.7779	29.5149	29.2464	22.3427	22.3427	22.3427
P07384	CAPN1	4.09261	6.91968	13	28.5792	30.0325	29.1756	22.3427	22.3427	22.3427
P54577	YARS1	4.86902	6.92969	13	28.7552	29.4019	29.6602	22.3427	22.3427	22.3427
P43490	NAMPT	6.38599	7.02698	13	29.4111	29.5428	29.1553	22.3427	22.3427	22.3427
P50995	ANXA11	5.33647	7.34244	13	29.3835	29.5642	30.1079	22.3427	22.3427	22.3427
P33992	MCM5	5.42415	7.43454	13	30.0423	29.9259	29.3636	22.3427	22.3427	22.3427
P46777	RPL5	3.00918	7.95374	13	31.2577	31.29	31.0917	25.0926	22.3427	22.3427
P23246	SFPQ	5.8327	8.25801	13	30.5715	30.2979	30.9328	22.3427	22.3427	22.3427
P09651	HNRNPA1	6.6346	10.1266	13	32.7452	32.3901	32.2727	22.3427	22.3427	22.3427
P40926	MDH2	4.24186	3.19932	14	32.3766	32.5362	32.5732	29.0203	29.601	29.2667
P27824	CANX	4.16719	3.68694	14	31.5532	31.3047	31.6034	27.6058	27.6058	28.1889
P04843	RPN1	5.12891	4.26666	14	30.3795	30.4334	30.6808	26.1229	26.4478	26.1229
Q7KZF4	SND1	3.76033	5.47775	14	29.3337	29.417	29.8212	23.6698	23.6698	24.7991
P00338	LDHA	4.37834	5.60189	14	32.3275	32.8865	32.9166	26.6763	27.2967	27.352
P46087	NOP2	2.80791	6.06929	14	29.5376	29.0492	28.963	22.3427	24.6564	22.3427
P04083	ANXA1	6.46059	6.47121	14	32.2789	32.4526	32.5983	25.9328	25.9328	26.0507
P00367	GLUD1	5.53739	6.63596	14	29.3291	28.8055	28.8015	22.3427	22.3427	22.3427
Q13200	PSMD2	4.70346	6.79111	14	29.0478	28.6796	29.6742	22.3427	22.3427	22.3427
Q01813	PFKP	3.73374	7.16518	14	30.2834	28.4726	29.7678	22.3427	22.3427	22.3427
P22234	PAICS	4.47515	7.28201	14	31.4467	31.7622	31.4898	23.7113	24.8922	24.2491
P40939	HADHA	6.37078	7.34473	14	29.6877	29.8951	29.4797	22.3427	22.3427	22.3427
P11387	TOP1	5.75336	7.46542	14	29.7019	29.5743	30.1483	22.3427	22.3427	22.3427
P41252	IARS1	5.33318	7.53654	14	30.3265	29.6748	29.6365	22.3427	22.3427	22.3427
Q9Y230	RUVBL2	8.36592	7.76004	14	30.177	30.0923	30.039	22.3427	22.3427	22.3427
Q9Y617	PSAT1	5.11807	7.80435	14	30.6517	30.0201	29.7695	22.3427	22.3427	22.3427
P36578	RPL4	4.08394	7.8243	14	32.7367	32.7901	32.87	25.9271	24.5642	24.4326
P43243	MATR3	6.41333	7.96915	14	30.5082	30.3627	30.424	22.3427	22.7021	22.3427
Q9Y265	RUVBL1	7.47895	8.66293	14	31.1544	30.9443	30.9183	22.3427	22.3427	22.3427
P62424	RPL7A	8.05212	8.79209	14	31.1172	31.0505	31.2368	22.3427	22.3427	22.3427
O60506	SYNCRIP	6.09021	9.30055	14	31.6525	31.9478	31.3296	22.3427	22.3427	22.3427
P61247	RPS3A	6.60557	9.57274	14	32.0436	32.0603	31.6426	22.3427	22.3427	22.3427
P0DMV9	HSPA1B	6.56496	9.62818	14	31.7064	32.1857	32.0207	22.3427	22.3427	22.3427
P05783	KRT18	6.49144	10.1747	14	32.2142	32.6134	32.7246	22.3427	22.3427	22.3427
P22626	HNRNPA2B1	5.58296	10.2469	14	32.3789	32.2767	33.1134	22.3427	22.3427	22.3427
Q16658	FSCN1	4.163	3.80176	15	31.2573	30.64	31.0849	26.9428	27.3008	27.3334
Q03252	LMNB2	5.25897	4.31632	15	30.4199	30.099	30.2408	25.8788	25.8068	26.1251
P07195	LDHB	5.1539	5.88432	15	33.8233	34.212	34.2897	28.3878	28.3159	27.9684
Q00839	HNRNPU	3.18838	5.9916	15	32.426	32.069	32.2156	25.0692	27.1328	26.5339
P55884	EIF3B	2.42791	6.60791	15	30.2535	29.7816	30.0598	25.5857	22.3427	22.3427
P11413	G6PD	5.622	6.88972	15	29.5509	29.1916	28.955	22.3427	22.3427	22.3427
P28838	LAP3	5.29082	6.92444	15	29.0418	29.0714	29.6884	22.3427	22.3427	22.3427
P35221	CTNNA1	5.30678	7.00482	15	29.5326	28.9261	29.5841	22.3427	22.3427	22.3427
P61978	HNRNPK	5.28213	7.0902	15	33.0825	33.2336	33.0016	25.796	26.4273	25.8239
O43175	PHGDH	2.23024	7.09648	15	30.6444	30.748	30.8984	22.3427	22.3427	26.3158
P14866	HNRNPL	2.90684	7.25413	15	30.4643	30.6407	30.3468	25.0039	22.3427	22.3427
Q04637	EIF4G1	6.27747	7.45774	15	29.6937	30.0563	29.6515	22.3427	22.3427	22.3427
P35998	PSMC2	6.83759	7.6715	15	29.8773	29.9669	30.1986	22.3427	22.3427	22.3427
P38919	EIF4A3	5.26995	7.90927	15	30.7061	29.8718	30.1782	22.3427	22.3427	22.3427
Q15233	NONO	5.9508	8.09788	15	30.7453	30.4127	30.1639	22.3427	22.3427	22.3427
P12268	IMPDH2	5.89631	8.21032	15	30.5481	30.8607	30.2503	22.3427	22.3427	22.3427
Q14974	KPNB1	6.62066	8.45029	15	30.9134	30.9117	30.5541	22.3427	22.3427	22.3427
P39023	RPL3	4.74808	8.45204	15	31.0146	31.2372	31.1701	23.3803	22.3427	22.3427
P34897	SHMT2	6.66677	8.64863	15	31.1171	30.7533	31.1037	22.3427	22.3427	22.3427
P11940	PABPC1	5.27411	8.86273	15	31.7499	31.1693	31.3278	22.3427	22.9733	22.3427
P08758	ANXA5	7.43571	9.38684	15	31.6156	31.6821	31.8911	22.3427	22.3427	22.3427
P21796	VDAC1	8.01496	11.0237	15	33.4702	33.2336	33.3956	22.3427	22.3427	22.3427
P49411	TUFM	6.31547	4.74157	16	31.5993	31.5752	31.8143	26.9707	26.8967	26.8967
P20700	LMNB1	4.99371	4.81982	16	29.637	30.1871	30.0767	25.1012	25.1012	25.239
Q13813	SPTAN1	5.2469	6.05066	16	28.707	28.4191	28.0541	22.3427	22.3427	22.3427
O00410	IPO5	8.74553	7.4699	16	29.7505	29.844	29.8434	22.3427	22.3427	22.3427
O00567	NOP56	6.04812	8.05738	16	30.7147	30.2759	30.2098	22.3427	22.3427	22.3427
P40227	CCT6A	2.1695	8.28209	16	32.1778	32.3004	32.2245	22.3427	27.1709	22.3427
Q99873	PRMT1	5.84075	8.49882	16	30.4662	31.0565	31.0021	22.3427	22.3427	22.3427
P60842	EIF4A1	3.20242	9.20048	16	32.4152	32.5496	32.5023	22.3427	25.1802	22.3427
P23396	RPS3	3.52634	9.21854	16	32.438	32.2483	32.3404	24.6856	22.3427	22.3427
P26641	EEF1G	7.03142	9.46752	16	31.8102	31.9933	31.6273	22.3427	22.3427	22.3427
O14980	XPO1	2.87181	6.29829	17	29.284	29.814	29.1093	22.3427	22.3427	24.6269
P27816	MAP4	6.87159	7.26186	17	29.601	29.4525	29.7603	22.3427	22.3427	22.3427
P14868	DARS1	5.51671	7.29034	17	29.9839	29.3109	29.6044	22.3427	22.3427	22.3427
Q86VP6	CAND1	5.91402	7.3134	17	29.9093	29.6857	29.3735	22.3427	22.3427	22.3427
P62258	YWHAE	6.41279	7.82443	17	33.7353	33.6944	33.6415	25.675	26.0922	25.8307
P04075	ALDOA	4.9785	8.11502	17	32.8464	32.9962	33.0429	25.4211	24.6281	24.4911
Q9UQ80	PA2G4	9.00354	9.12105	17	31.5155	31.4032	31.4727	22.3427	22.3427	22.3427
P06744	GPI	7.28688	9.3123	17	31.6463	31.8146	31.5042	22.3427	22.3427	22.3427
P52272	HNRNPM	4.66213	9.3248	17	32.0663	31.9635	32.1828	23.5527	22.3427	22.3427
P60174	TPI1	9.48178	11.1823	17	33.5296	33.5754	33.4702	22.3427	22.3427	22.3427
P29401	TKT	5.62776	4.50347	18	32.092	31.8756	32.0201	27.4754	27.6617	27.3402
P08243	ASNS	5.17036	5.8296	18	30.9319	30.9782	31.1547	25.5474	25.0143	25.0143
P27708	CAD	4.77313	6.01013	18	28.0464	28.8411	28.1711	22.3427	22.3427	22.3427
P04406	GAPDH	4.71898	6.69456	18	35.7226	35.581	35.4611	28.8562	28.4401	29.3848
P15311	EZR	3.82871	9.97136	18	33.1054	32.9027	33.0534	24.462	22.3427	22.3427
P06576	ATP5F1B	7.20096	11.0077	18	33.3303	33.1683	33.5527	22.3427	22.3427	22.3427
P31939	ATIC	4.50323	4.68333	19	30.6105	30.611	30.2886	26.2082	25.5624	25.6895
Q14697	GANAB	2.78555	7.17511	19	30.5316	30.4637	30.4023	22.3427	25.1868	22.3427
O75533	SF3B1	4.35985	7.18394	19	29.4359	28.9276	30.2165	22.3427	22.3427	22.3427
P26639	TARS1	5.74196	7.46177	19	29.4955	30.1016	29.8164	22.3427	22.3427	22.3427
O75369	FLNB	6.81082	7.61053	19	30.0297	29.7617	30.0684	22.3427	22.3427	22.3427
P53396	ACLY	5.99757	7.69312	19	29.9944	30.324	29.7892	22.3427	22.3427	22.3427
P55786	NPEPPS	9.21994	7.73387	19	30.0422	30.124	30.0637	22.3427	22.3427	22.3427
P02786	TFRC	6.92202	8.06331	19	30.5973	30.2985	30.3224	22.3427	22.3427	22.3427
P13010	XRCC5	7.95533	8.94244	19	31.3825	31.2932	31.1798	22.3427	22.3427	22.3427
P07237	P4HB	2.42481	5.33962	20	32.8289	32.43	32.5091	27.9496	25.5132	28.2865
P22102	GART	6.31123	7.74099	20	29.8223	30.2232	30.2057	22.3427	22.3427	22.3427
P49588	AARS1	5.78451	7.85158	20	29.9832	30.0479	30.5519	22.3427	22.3427	22.3427
P26640	VARS1	5.87036	7.91205	20	30.5972	30.0484	30.1188	22.3427	22.3427	22.3427
P25705	ATP5F1A	2.78671	7.98347	20	32.911	32.4606	32.7871	26.8287	23.6898	23.6898
P31948	STIP1	7.49121	9.16917	20	31.5623	31.3579	31.6155	22.3427	22.3427	22.3427
P49368	CCT3	7.45133	9.61204	20	31.887	31.8551	32.1223	22.3427	22.3427	22.3427
P00558	PGK1	6.3519	10.279	20	32.3724	32.9458	32.5471	22.3427	22.3427	22.3427
Q9NR30	DDX21	3.11645	4.74255	21	30.5203	30.676	30.1774	25.2233	26.6995	25.2233
Q9Y490	TLN1	6.63644	6.64173	21	28.9014	28.8817	29.1703	22.3427	22.3427	22.3427
P13667	PDIA4	5.88328	6.96879	21	30.9471	30.5844	30.9752	24.0326	23.7839	23.7839
P54136	RARS1	8.19888	7.33883	21	29.7632	29.6568	29.6248	22.3427	22.3427	22.3427
P07814	EPRS1	5.22555	7.4437	21	30.0454	29.8452	30.1281	22.3427	23.0021	22.3427
Q08211	DHX9	7.37008	8.79908	21	30.9814	31.239	31.205	22.3427	22.3427	22.3427
P48643	CCT5	6.02316	8.97634	21	31.242	31.6606	31.0547	22.3427	22.3427	22.3427
Q13263	TRIM28	5.73433	9.02286	21	31.7721	31.2704	31.0543	22.3427	22.3427	22.3427
Q12906	ILF3	7.29498	9.34191	21	31.5941	31.5961	31.8638	22.3427	22.3427	22.3427
P50991	CCT4	8.91159	9.64668	21	32.0215	31.9167	32.0302	22.3427	22.3427	22.3427
P06733	ENO1	4.71999	9.85392	21	35.1068	35.2793	35.2157	24.9325	24.9325	26.175
P17987	TCP1	2.72488	7.59448	22	31.9535	31.9451	31.5446	23.1866	26.2865	23.1866
Q14152	EIF3A	7.03763	8.17484	22	30.3386	30.6349	30.5793	22.3427	22.3427	22.3427
P11586	MTHFD1	7.54189	8.43603	22	30.7698	30.662	30.9046	22.3427	22.3427	22.3427
P30101	PDIA3	6.45653	9.4295	22	31.8925	31.4806	31.9436	22.3427	22.3427	22.3427
P11142	HSPA8	5.26232	7.09362	23	34.1753	34.0753	34.1453	27.4361	26.9919	26.687
Q99832	CCT7	5.17947	7.39093	23	31.8004	31.5631	31.5754	24.7026	24.1012	23.9624
P18206	VCL	5.66905	7.70056	23	30.1416	29.6791	30.3092	22.3427	22.3427	22.3427
P07900	HSP90AA1	4.50806	7.85224	23	33.2897	33.4823	33.2897	25.5136	24.8542	26.1371
P09874	PARP1	5.93799	8.49858	23	31.1285	30.5153	30.8802	22.3427	22.3427	22.3427
P78371	CCT2	3.16951	9.22687	23	32.6357	32.3013	32.6558	25.2267	22.3427	22.3427
Q14204	DYNC1H1	5.54843	6.55217	24	28.9492	28.5738	29.1618	22.3427	22.3427	22.3427
Q92616	GCN1	4.43514	6.61086	24	29.5372	28.3942	28.9295	22.3427	22.3427	22.3427
P34932	HSPA4	7.09104	8.80163	24	31.0238	31.0777	31.3316	22.3427	22.3427	22.3427
P07355	ANXA2	3.60773	10.9691	24	34.1975	34.2408	34.1604	22.3427	22.3427	25.0057
P19338	NCL	10.679	11.3129	24	33.684	33.6307	33.6522	22.3427	22.3427	22.3427
P08238	HSP90AB1	5.0758	6.93039	25	35.595	35.3828	35.2965	28.797	28.6239	28.0622
P05023	ATP1A1	7.2239	8.54806	26	30.9012	30.738	31.0332	22.3427	22.3427	22.3427
P55072	VCP	8.90899	9.2956	26	31.5902	31.618	31.7069	22.3427	22.3427	22.3427
P38646	HSPA9	3.99475	9.70611	26	32.7523	32.4692	32.7803	24.198	22.3427	22.3427
P22314	UBA1	8.22166	9.86932	26	32.2685	32.2666	32.1011	22.3427	22.3427	22.3427
P50990	CCT8	6.21926	3.04949	27	32.4892	32.4696	32.5935	29.3912	29.5083	29.5043
Q02952	AKAP12	2.06156	6.89848	27	30.9201	30.3436	30.7453	26.6281	22.3427	22.3427
O75643	SNRNP200	5.41414	7.63043	27	30.0523	30.3019	29.5653	22.3427	22.3427	22.3427
P46940	IQGAP1	5.06453	8.11261	27	29.9015	30.6454	30.8192	22.3427	22.3427	22.3427
P12956	XRCC6	8.10941	10.1037	27	32.3623	32.413	32.5641	22.3427	22.3427	22.3427
O43707	ACTN4	3.97752	5.76007	28	32.3646	32.2877	32.1224	26.1296	26.1296	27.2354
P11021	HSPA5	8.63234	11.3941	28	33.6415	33.7553	33.8138	22.3427	22.3427	22.3427
P14618	PKM	5.83142	5.96344	29	34.5062	34.2759	34.5354	28.4053	28.3405	28.6813
P10809	HSPD1	3.48145	8.73443	29	34.1068	34.1827	34.1753	26.9131	24.4138	24.9348
P14625	HSP90B1	7.34214	8.92323	29	32.7393	32.7202	32.4836	23.7507	23.7113	23.7113
P02545	LMNA	6.18926	9.17755	32	31.4115	31.3023	31.847	22.3427	22.3427	22.3427
Q00610	CLTC	2.9914	8.95133	33	32.1985	32.4782	32.3311	22.3427	25.4684	22.3427
P13639	EEF2	4.99557	6.23653	36	34.1604	34.402	34.3236	27.8066	27.8864	28.4835
P42704	LRPPRC	3.36488	8.06867	38	31.4582	31.1894	30.7657	24.5218	22.3427	22.3427
P21333	FLNA	7.60831	9.27436	45	31.7627	31.519	31.5696	22.3427	22.3427	22.3427
P35579	MYH9	3.2239	7.2204	56	32.6249	32.5484	32.6649	26.8577	24.6597	24.6597
P78527	PRKDC	5.03705	5.08467	58	31.5213	31.8529	31.6365	26.8867	26.435	26.435
P49327	FASN	5.68321	8.51198	66	33.3033	33.3568	33.2478	24.4301	25.137	24.805
Q15149	PLEC	4.09715	8.18177	68	30.721	30.8731	31.3565	22.3427	22.3427	23.7197
Q09666	AHNAK	2.76936	7.03393	94	32.5039	32.3596	32.6148	23.6487	25.948	26.7798
