# Supplementary material for: An approach for the systematic profiling of drug-induced remodeling of RNA–RBP (RNA-binding protein) interactions
Source: Royal Society of Chemistry journal article supplement (doi:10.1039/d6ra00871b), 2026-05-19
Supplement: d6ra00871b3.xlsx [file d6ra00871b3.xlsx]

## Sheet: Cover
Table S2. List of published RBPs in human cells
Table S2a. Reference Data
Table S2b. Published RBPs in human cells

## Sheet: Table S2a
Table S2a. Reference Data
Year	Method Name	Organism	Type	Poly(A)-Based	Non-Poly(A)-Based	Numbers of RBPs	DOI	Accession number
2012	RIC	Homo sapiens	HeLa	√		843	10.1016/j.cell.2012.04.031	PXD002880
2016	RBDmap	Homo sapiens	HeLa	√		529	10.1016/j.molcel.2016.06.029	PXD000883
2018	RICK	Homo sapiens	HeLa		√	720	10.1038/nmeth.4595	/
2018	CARIC	Homo sapiens	HeLa		√	597	10.1073/pnas.1718406115	/
2019	OOPS	Homo sapiens	HEK293, MCF10A, U2OS		√	1838	10.1038/s41587-018-0001-2	PXD009668
2019	XRNAX	Homo sapiens	HeLa, MCF7, HEK293		√	2481	10.1016/j.cell.2018.11.004	PXD010520
2019	PTeX	Homo sapiens	HEK293		√	3026	10.1038/s41467-019-08942-3	PXD009571

## Sheet: Table S2b
Table S2b. Published RBPs in human cells
Uniprot accession	RIC	RBDmap	RICK	CARIC	OOPS	XRNAX	PTeX	GO:RNA binding
A0A7I2V3Q3	√
H0YFG2	√
P78332	√			√	√	√	√
A0A994J597	√
P05141	√		√	√				√
I3L1L6	√
Q9BQ52	√	√	√		√	√	√
Q96CT7	√	√			√	√	√	√
G3XAN0	√
A0A8I5KXH5	√
A0A7P0TAJ5	√
J3KSR7	√
K7ELW5	√
F8VUF6	√
D6R8Z5	√
G3V2R1	√
H0YLN9	√
H0YH33	√
A6PVC9	√
Q9NYF8	√		√	√	√	√	√	√
Q8WVM0	√					√
K7ENI2	√
F5H6J5	√
A0A140T9Z1	√
D6REC7	√
E7EVJ4	√
E5RJ41	√
D6RF50	√
C9JMN3	√
P12270	√				√	√	√	√
H7C456	√
A0A087WU10	√
A0A0C4DG79	√
H7C1X4	√
D6RGK0	√
A0A087WYW2	√
Q9UKD2	√		√			√	√
A0A3B3ITZ9	√
H7BZ72	√
K7EKN3	√
H7BY37	√
C9JW01	√
M0R051	√
H0Y8W1	√
Q4VXB2	√
A0A1W2PPR9	√
Q9H0J9	√	√				√
P54886	√	√		√	√	√		√
A0A0D9SEI8	√
F5H1H2	√
Q9NSS8	√
F8VYR5	√
E7EX17	√
M0QYQ9	√
Q8IX01	√		√	√	√	√	√
Q6PDA5	√
Q16513	√				√		√
Q96T58	√	√	√		√	√	√
H7C466	√
H0Y449	√
M0R055	√
Q9NXG2	√				√	√	√	√
P14618	√		√	√	√	√	√	√
J3KP30	√
K7EQH7	√
A0A7I2V4N4	√
A0A2R8Y857	√
P62899	√				√	√	√	√
A0A0S2Z569	√
Q14527	√					√	√
A0A8V8TM41	√
E9PC69	√
Q9Y6M1	√	√			√	√	√	√
E9PMI6	√
K7EQA5	√
A0A2R8Y798	√
A0A0U1RQK7	√
A0A096LNX0	√
C9JKH7	√
A0A384MEG1	√
H0YHU8	√
F5H606	√
F8W1T6	√
Q9NUK0	√					√
A0A8V8TP90	√
H7C0H9	√
A0A2R8Y4T1	√
C9JLP0	√
A0A8V8TKU9	√
Q15397	√		√		√	√	√	√
P07900	√	√	√	√	√	√	√	√
H0Y503	√
Q8TEQ6	√		√	√	√	√	√	√
A0A0C4DFW3	√
S4R398	√
F2Z2Y2	√
M0R0R2	√
J3KRG5	√
E9PKY5	√
Q8NC60	√					√
A0A087WXR6	√
E7EW07	√
Q8IWX8	√		√		√	√	√	√
Q12986	√				√	√
A0A7P0Z4I0	√
Q4TT37	√
E5RJW4	√
Q7Z6Z7	√		√		√	√	√	√
Q15654	√				√	√
A0A087X0F4	√
P78316	√		√		√	√	√
D6RJE2	√
Q9Y224	√						√	√
E9PJ04	√
Q9NVP1	√		√	√	√	√	√	√
Q92945	√	√	√	√	√	√	√	√
Q9H0D6	√		√	√	√	√	√	√
F8VR69	√
A0A087WX71	√
F8VZS0	√
Q9UJA5	√		√			√	√
P30086	√	√		√	√	√	√	√
Q6IBQ5	√
Q14697	√					√	√	√
Q9GZR7	√		√		√	√	√
C9IZV9	√
B1ANR0	√
Q9P2N5	√		√	√	√	√	√
Q96PZ0	√		√	√		√	√
Q9NYL2	√				√	√	√
Q6P6C2	√				√	√	√
G3V2Q1	√
G3V2X0	√
P15311	√		√	√	√	√	√	√
B0YIW6	√	√
P62269	√		√		√	√	√	√
P08238	√	√	√	√		√	√	√
A0AAQ5BH43	√
B4DHY1	√
K7ENN6	√
M0R0Y6	√
K7ESD1	√
A0A994J4Q5	√
P46109	√				√	√	√	√
H7C1L2	√
F6VXF5	√
C9JKE2	√
P09382	√			√	√			√
V9GYY5	√
H7C133	√
Q6FHM6	√
Q92841	√	√	√	√	√	√	√	√
Q9UGU0	√				√
Q9Y3I0	√	√	√	√	√	√	√	√
F5H716	√
F8WCX5	√
F8WCR1	√
B0QYY6	√
O15371	√			√	√	√	√	√
Q9UPQ9	√				√	√	√
Q9UGR2	√				√	√	√
Q7RTV0	√				√	√	√
Q00688	√	√			√	√	√
Q13243	√	√		√	√	√	√
G3V2X4	√
Q53XL8	√
G3V396	√
S4R3H4	√
Q86U42	√	√	√		√	√	√	√
A0A7I2V5S0	√
Q9H307	√		√	√	√	√	√	√
A0A0A0MSZ9	√
O43399	√						√	√
O94906	√		√		√	√	√
O00567	√	√	√	√	√	√	√	√
A0A0A0MT56	√
Q06787	√			√	√	√	√
O43719	√				√	√	√
P98179	√	√		√	√	√	√
Q9Y2H6	√					√
Q92665	√	√				√	√
H3BTU6	√
J3QKU3	√
H3BNS8	√
H3BSB5	√
A0AAA9YHD0	√
H3BR35	√
H3BUM8	√
H3BTS8	√
Q1ED39	√				√	√	√
H3BSS6	√
Q8WXD2	√
E5RK39	√
P14866	√	√	√	√	√	√	√	√
M0QYR1	√
K7EMT0	√
K7EQQ8	√
Q9Y421	√
O43823	√		√	√	√	√	√
M0R2Q4	√
A0A2R8Y4Z8	√
M0QZV6	√
K7ELF1	√
M0QZU5	√
M0QX71	√
E7EN72	√
M0R3D6	√
Q9Y6V7	√					√	√
F8WCN4	√
F2Z3H0	√
A0A7P0T8C6	√
C9K0U8	√
V9HW43	√
O75127	√					√
Q9NW13	√	√	√	√	√	√	√	√
B3KQX1	√
Q9Y4P3	√				√	√
A0A7I2V385	√
S4R3B5	√
A0A0A0MRX1	√
Q96I24	√	√	√	√	√	√	√	√
O60869	√	√			√	√	√	√
Q14152	√		√	√	√	√	√	√
S4R3G6	√
A0A994J542	√
O75607	√				√	√	√	√
Q8NE35	√
A0A8I5KVU2	√
Q5T3R7	√
Q9P287	√				√	√	√	√
Q5T851	√
A0A140VJK1	√
E5KSU5	√
H0YMF4	√
Q7Z417	√	√			√	√	√
A0A7I2YQG2	√
O15234	√				√	√
J3KRX4	√
J3QR05	√
J3QRQ7	√
D6RE11	√
I3L223	√
E7EN55	√
K7EJ74	√
B4DJF2	√
K7EK85	√
Q9NY12	√					√	√	√
E9PRR7	√
O43143	√	√	√	√	√	√	√	√
E9PNE6	√
Q9H6F5	√				√	√	√	√
H0Y3P2	√
P26196	√			√	√	√	√	√
P05783	√			√		√		√
A0A140VJE3	√
B4DEH5	√
F5H2I2	√
F8WJN3	√
Q13601	√				√	√	√	√
F5H5X6	√
A0A9L9PWX6	√
B2R6F3	√
P25398	√	√		√	√	√	√	√
F8WBL2	√
Q5T653	√				√	√
Q96IP4	√
Q9NP92	√				√	√
A0A7I2V4A9	√
H7C5U6	√
D6R970	√
Q8TDN6	√		√	√	√	√	√	√
A0AA34QVU1	√
E5RJM0	√
F8WDA0	√
C9JXB8	√
B4DXZ6	√
P52298	√	√				√
E7ETU7	√
O43818	√					√	√	√
C9JWH9	√
A0A7I2V428	√
Q9Y3B4	√					√	√	√
S4R417	√
Q9NQC3	√				√	√		√
F8WC81	√
P50991	√		√	√	√	√	√	√
A0A494C1M2	√
A0A384N6A4	√
A0A024R4E5	√
Q9BSC4	√		√		√	√	√
C9J9W7	√
P14868	√				√	√	√	√
F8WEA1	√
P31483	√	√	√	√	√	√
P63165	√		√			√
S4R369	√
K7ELC4	√
E9PS21	√
Q08170	√				√	√	√
H0Y9K7	√
Q5LJB0	√
B4DWT1	√
P82914	√					√
H7C2Q8	√
A0A3B3IU35	√
A0A0A0MSI0	√
Q9Y520	√	√		√	√	√	√
A0A6Q8PFT8	√
H7C2R4	√
O95926	√					√
O15446	√				√	√	√
C9JPI6	√
Q5T3Q7	√
B1ALY4	√
Q4FZ45	√
H0YJW7	√
E9PQU5	√
A0A024R6G4	√
A0A8I5KR56	√
P09913	√					√
A0A6Q8PFX6	√
B7Z7P8	√
O75691	√		√		√	√	√
B1AKP7	√
I3L2N7	√
I3L2W4	√
Q8NDF8	√					√	√
A0A0U1RQF9	√
X6RK96	√
Q9NP64	√	√				√
Q07666	√		√	√	√	√	√	√
G3V1B3	√
I3L382	√
A0A2R8Y4A2	√
A0A7I2V3P7	√
A6NGY7	√
H0YIL2	√
H0YHH7	√
K7ENP6	√
F8VX46	√
Q07954	√
D6RA17	√
A6PVY5	√
Q9UKV8	√				√	√	√
A0A590UJK4	√
Q5JXR6	√
B7Z6D5	√
D6RAR6	√
A0A8Q3WK70	√
U3KPZ9	√
H0Y3W3	√
A0A2R8YFH6	√
P35659	√				√	√	√	√
E9PJZ0	√
H3BTH2	√
Q9BZI7	√				√	√	√
J3QLS3	√
A0AAK2PNZ4	√
P35269	√				√	√	√
B9ZVP7	√
K7EJB5	√
A0A6Q8PHG0	√
Q5QPM0	√
P20042	√	√			√	√	√	√
A0A0U1RR19	√
K7EQ03	√
A0A0S2Z5I7	√
Q12931	√				√	√	√	√
H7BYM1	√
A0A087WVM7	√
H0YJB7	√
P55795	√	√	√	√	√	√	√	√
A0A7P0TA04	√
I3L3W3	√
P26651	√
F2Z2Y6	√
A0A0C4DGL3	√
P51116	√	√		√	√	√	√
O43896	√				√	√
H0YH26	√
K7EKJ9	√
Q8NEJ9	√	√			√	√	√
A0A6I8PL58	√
Q14151	√		√	√	√	√
J3KTD3	√
A0A7P0T9F9	√
H7C2G6	√
A0A8V8TL71	√
U3KQK1	√
Q9BYK8	√			√	√	√
Q5T6L5	√
Q9UPT8	√				√	√	√
A8MV53	√
O75821	√	√			√	√	√	√
A0A8Q3SIS9	√
J3QR28	√
Q5JRS1	√
Q8WUA2	√	√			√	√	√
Q8NF91	√
F8WF24	√
K7ERY7	√
H0Y472	√
A0A2R8Y5N1	√
Q8N567	√					√
G3V407	√
F6R0H4	√
E9PPY3	√
F8WBP9	√
C9J406	√
A0A087X0W0	√
I3L311	√
H0Y8R1	√
O75179	√				√	√	√
Q9NQZ2	√					√	√
K7EMB1	√
O95218	√	√			√	√
P52758	√						√
O75616	√				√	√
J3QRD6	√
V9GYL4	√
Q9H0Z9	√					√
Q8TCC6	√
A0A0P1J1R0	√
C9JYX8	√
F8VNY5	√
G3V1X1	√
P05198	√				√	√	√	√
Q5VTL8	√				√	√	√
B7Z8L1	√
H3BT37	√
Q5JY83	√
H0YCK1	√
P54577	√	√	√		√	√	√	√
H0YG10	√
H0YEY0	√
A0A0A0MTB8	√
A0A7P0TBF4	√
A0A994J591	√
Q9UGI8	√	√					√	√
A0A7I2YQV8	√
E9PJN6	√
G3V153	√
F8VQT2	√
P09651	√	√	√	√	√	√	√	√
Q08211	√	√	√	√	√	√	√	√
Q5TC82	√					√
Q07065	√				√	√		√
O00425	√	√	√	√		√	√
C9J7P5	√
F8WEI3	√
J3KSR8	√
P62995	√	√	√	√	√	√	√	√
H9ZYJ2	√
A0A0D9SG72	√
P42766	√				√	√	√	√
Q5T6F2	√				√	√	√
A2A3R5	√
A0A5K1VW93	√
E5RHF4	√
Q9BRD0	√						√
A0A2R8Y5S7	√
H7C3F4	√
Q9BXS6	√					√	√
H0YKX1	√
O00442	√					√	√
P55084	√				√	√		√
A0A804HJA1	√
A0A8V8TP85	√
E7ETK0	√
E7ERC4	√
A0A7I2V4F2	√
Q53R41	√					√
H0YNT4	√
E9PBL0	√
H0Y8G5	√
A0A7I2YQS2	√
O60763	√	√			√	√	√	√
G3V1V1	√
A8MUK0	√
Q9BRT6	√	√				√
E2PSN0	√
Q5VZF2	√					√
P55081	√				√	√	√
H0YLA2	√
O95453	√		√			√	√	√
H0YEN5	√
J3KSI1	√
I3L445	√
J3QQS9	√
P38919	√		√	√	√	√	√	√
O60287	√		√		√	√	√
M0R1H6	√
A0A7I2V5L3	√
A0A075B6F9	√
Q5VU21	√
P62241	√	√	√	√	√	√	√	√
Q9H9L3	√					√	√
P51858	√		√	√	√	√	√	√
Q5SZ64	√
Q5VU79	√
Q12905	√	√	√	√	√	√	√	√
Q8NDD1	√					√	√
O15381	√		√		√	√	√
Q9BU76	√				√	√	√
A0A7I2V3E1	√
V9GYK2	√
J3QTR3	√
C9JVQ0	√
O75643	√		√		√	√	√	√
A0A8Q3WKL2	√
A0A8Q3SIB0	√
Q8N5P1	√				√	√	√
P10809	√	√	√		√	√	√	√
C9JGM7	√
P62910	√	√			√	√	√	√
A0A994J3P6	√
Q9NX58	√				√	√	√	√
V9HVY8	√
I3L1N9	√
P61247	√	√	√	√	√	√	√	√
P20290	√				√	√	√	√
E5RIF8	√
Q9NX24	√	√			√	√
Q9ULW3	√					√	√
Q6DKI1	√				√	√	√	√
C9JQV0	√
Q96QR8	√			√	√	√
U3KQ63	√
P40227	√		√	√	√	√	√	√
Q7L2J0	√		√	√	√	√	√
V9GZ75	√
A0A7I2V4J2	√
H3BNC1	√
H7C2C5	√
E5RFH3	√
A8MUD9	√
H0YBE0	√
E5RJT0	√
E5RIC4	√
Q8N3Z6	√					√
O75683	√			√		√	√
A0A0C4DG31	√
Q5T8U3	√
Q5VU11	√
P46013	√		√		√	√	√	√
E7EVG6	√
Q14690	√	√	√	√	√	√	√	√
Q08945	√		√	√	√		√	√
E9PKA1	√
E9PKH2	√
F2Z2S8	√
Q8N684	√		√	√	√	√	√	√
Q5JXC6	√
Q9P013	√						√
Q8NEF9	√					√	√
E7ETC0	√
A0A0A0MTS3	√
P47974	√	√				√	√
C9J4T8	√
O14979	√	√	√	√	√	√	√	√
A0A087WWU9	√
A0A1W2PQD4	√
B4DN88	√
A0A6Q8PFI2	√
A0A8V8TNC1	√
C9JG87	√
Q9NSI8	√
A0A8I5KZ07	√
H7BZL0	√
A0A8I5KSP1	√
Q8IUH3	√	√			√	√
A0A090N8Y2	√
A0A5F9ZH76	√
A0A2R8Y838	√
E5RI99	√
B1AR60	√
A0A7I2V659	√
Q5JRC6	√
Q9BVJ6	√		√		√	√	√	√
F8WE11	√
H7C0R9	√
E5RFP4	√
B2R4R0	√
O60841	√	√			√	√	√	√
H3BRH3	√
Q8N163	√		√	√	√	√	√	√
A0A994J4Y9	√
P21291	√	√		√	√	√
Q9NZI8	√	√	√	√		√	√
Q5VWC4	√	√
H0Y2Y8	√
P56181	√
A0A1B0GW87	√
Q14684	√		√	√	√	√	√
A0A1W2PQG6	√
P56182	√		√		√	√	√
K7ES42	√
A0A087X1B7	√
A0A7P0Z4K3	√
P14324	√		√		√		√	√
E9PAV9	√
P62917	√			√	√	√	√	√
J3QL05	√
P81605	√					√
F8VSA9	√
K7EKR9	√
J3QRP5	√
Q96CP2	√					√	√
E9PIN3	√
P47914	√				√	√	√	√
E9PE10	√
E9PEB5	√
Q8N6N3	√					√	√
A0A0A0MRN4	√
A0A494C001	√
H7BZ23	√
H7C233	√
H3BM18	√
D6R9D6	√
C9JH61	√
B1AK66	√
B7Z4L4	√
B4DMU5	√
A0A087X0F1	√
H0YAE8	√
F8WEH5	√
D6R9A6	√
A0A8V8TQ34	√
D6RF65	√
A0A0A0MQZ6	√
Q549U1	√
B0AZS6	√
A0A087WT20	√
O75475	√				√	√	√	√
A0A994J4E9	√
H0YD70	√
A0A0A0MRW6	√
Q96CM3	√	√				√
P36542	√	√						√
Q9NR30	√	√	√	√	√	√	√	√
Q14692	√	√	√		√	√	√	√
Q8IZ73	√					√
H0YER7	√
S4R341	√
A0A7P0TB45	√
Q86TB9	√			√	√	√	√
A0A8I5KS72	√
O43809	√					√	√	√
J3QLR7	√
O95900	√	√				√
P42765	√	√		√	√
P26373	√	√	√	√	√	√	√	√
P13639	√	√	√	√	√	√	√	√
I3L1Q5	√
Q9UHB9	√				√	√	√	√
H3BPG6	√
I3L1I8	√
H0YFX4	√
H7C561	√
Q5JTJ3	√	√
Q702N8	√
Q5SRN1	√
P31948	√			√	√	√	√	√
H3BUE3	√
Q9Y4B5	√
A0A2R8Y4Q0	√
J3KT21	√
C9IZ01	√
P31943	√	√	√	√	√	√	√	√
A0A0D9SEX1	√
A0AA34QVH0	√
Q96D46	√				√	√	√
Q9BYD6	√					√	√
Q53SS8	√
P49327	√		√		√	√	√	√
A0A0S2Z4Q3	√
P52597	√	√	√	√	√	√	√	√
Q9BRZ2	√			√	√	√
Q12873	√		√			√	√
P61981	√	√		√	√	√	√	√
A0A7I2V5D8	√
F8VR77	√
P62310	√					√	√
C9JM19	√
I3L1Y4	√
Q01780	√		√		√	√	√
P63220	√					√	√	√
Q9HC36	√					√
B5MCP9	√
Q96QE5	√					√
E5RJI7	√
Q9HA38	√
Q8WTT2	√		√		√	√	√	√
Q14789	√				√	√	√
Q969S3	√				√	√	√
O14647	√				√	√
X6RAC9	√
E9PLB0	√
E9PB51	√
C9JVB6	√
Q6P2Q9	√		√	√	√	√	√	√
P36578	√	√	√	√	√	√	√	√
E9PQB6	√
D6RF49	√
E7ERA2	√
V9HWK0	√
H7C514	√
E5RJ47	√
E9PQI8	√
Q9H3H3	√					√
Q5U5Q3	√					√
F5H1S9	√
Q6NZI2	√				√			√
Q9H0L4	√				√	√
Q13151	√	√	√	√	√	√	√	√
J3QLF6	√
Q9NV31	√					√
A0A8I5KPM1	√
Q15149	√		√		√	√	√	√
F8WE36	√
Q9BUL9	√					√
P49411	√	√	√	√	√	√	√	√
Q15050	√		√	√	√	√	√	√
A0A024RAC5	√
V9HW88	√
H3BNC8	√
B2R6D8	√
P59045	√
B5MCG9	√
E9PQ56	√
Q9NX07	√	√				√
B4DLR8	√
A0A7I2V579	√
A0A6Q8PGB0	√
H7C0B4	√
Q86XN8	√					√
J3QLR8	√
H0YL99	√
Q8IXM3	√				√	√
A0A0C4DH18	√
P07355	√		√	√	√	√	√	√
A0A087WWE0	√
P08708	√			√	√	√	√	√
Q9NUL7	√				√	√
A0A0S2Z4X1	√
F8WBS5	√
P08240	√	√				√
Q01844	√	√	√	√	√	√	√	√
H0YA06	√
Q12874	√		√	√		√	√	√
Q9Y3A2	√					√
E9PFP8	√
E9PB61	√
H3BN88	√
B9ZVT1	√
F8W881	√
Q99613	√			√		√	√	√
C9J384	√
P16401	√	√		√		√
E5RJ39	√
Q96EV2	√		√		√	√	√
Q9BVI4	√		√			√	√
Q00577	√	√		√	√	√	√
Q8N8A6	√		√	√	√	√	√
Q6PK04	√				√	√	√
A0A7P0T9E3	√
Q07352	√
A0A8Q3WL22	√
A0A087X0Q1	√
Q9NS39	√					√
O15226	√		√	√	√	√	√
A0A286YER0	√
Q86WX3	√					√
Q5HYY5	√
P16403	√	√		√	√		√	√
Q4G0W3	√
Q6ZUT6	√
Q96FQ6	√					√		√
P42696	√		√		√	√	√
F8WDZ7	√
Q9Y3T9	√		√	√	√	√	√	√
P07305	√	√				√		√
Q9Y3A4	√					√	√
Q8IYD1	√
Q5T7C4	√
B8ZZZ7	√
P26447	√			√		√		√
M0R2M5	√
P62937	√			√		√	√	√
A8K3M3	√
P12956	√	√	√	√	√	√	√	√
F8WE98	√
A0A3B3ISH6	√
A0A7P0T990	√
F8W1G6	√
A0A140VK49	√
E5RK24	√
Q99729	√	√	√	√	√	√	√	√
Q5VXN0	√
P62854	√	√		√	√	√	√	√
A0A0A0MSJ1	√
S4R2Z7	√
P62701	√		√	√	√	√	√	√
Q9BXY0	√					√	√	√
P62750	√		√		√	√	√	√
A0A075B6R3	√
S4R3J8	√
P62906	√	√	√	√	√	√	√	√
P11387	√		√	√	√	√	√	√
Q5T280	√					√
C9J9M8	√
E9PD43	√
A8K5I0	√
Q9Y333	√				√	√	√	√
D2IYK3	√
O60231	√		√	√	√	√	√
Q5STZ8	√
P79522	√					√
P63244	√	√		√	√	√	√	√
A0A2R8Y5A6	√
F8VZQ9	√
E9PP22	√
A2VCK8	√
H3BTY0	√
Q9H0S4	√		√	√	√	√	√	√
C9J0L4	√
Q1KMD3	√		√	√	√	√	√	√
F6S8Q4	√
A0A024RCM3	√
A0A0A6YYL6	√
A0A1U9X985	√
Q9UMY1	√					√	√
P62857	√	√		√	√	√	√	√
A0A1W2PPQ2	√
B0UZZ8	√
F8WDX3	√
C9K028	√
Q9ULR0	√					√	√
Q15269	√	√	√		√	√	√	√
A0A087WX23	√
Q5JX62	√
Q9NRW3	√				√		√
Q6IBS0	√					√	√	√
Q9NVA2		√				√	√
G5EA30		√
Q6PUV4		√
Q96GQ7		√	√	√	√	√	√	√
Q15233		√	√	√	√	√	√	√
Q53EP0		√			√	√
P52272		√	√	√	√	√	√	√
J3KPS3		√
P68036		√				√	√	√
P46783		√	√		√	√	√	√
B4DGP8		√
P23396		√	√	√	√	√	√	√
Q8IXT5		√		√	√	√
P51608		√				√
P84103		√	√	√	√	√	√	√
Q16629		√	√	√	√	√	√	√
P15880		√	√	√	√	√	√	√
Q9NWH9		√	√	√	√	√	√	√
Q9Y3X0		√				√
P62424		√	√	√	√	√	√	√
O60506		√	√	√	√	√	√	√
P42704		√	√	√	√	√	√	√
P55265		√	√	√	√	√	√	√
P83731		√	√	√	√	√	√	√
Q15366		√		√	√	√	√	√
Q15365		√	√	√	√	√	√	√
B4DTG2		√
P07108		√
P39019		√	√		√	√	√	√
Q8NDT2		√	√		√	√
P38159		√	√	√	√	√	√	√
P19338		√	√	√	√	√	√	√
Q96E39		√			√	√
Q9Y3D9		√				√		√
Q7L2E3		√	√	√	√	√	√
P26038		√	√	√	√	√	√
P50914		√	√	√	√	√	√	√
O43175		√	√	√	√	√	√
P35637		√	√	√	√	√	√	√
Q96PK6		√	√	√	√	√	√	√
Q9BQ67		√	√			√	√	√
Q01082		√		√		√	√	√
P23588		√		√	√	√	√	√
Q96SI9		√	√	√	√	√	√
Q7Z2W4		√	√	√	√	√	√
Q9Y3Y2		√	√	√	√	√		√
Q9HC35		√			√	√	√
O15143		√			√	√	√
P31942		√	√	√	√	√	√	√
Q12849		√	√	√	√	√	√	√
Q8TDD1		√	√	√	√	√	√
G5E9Q2		√
P25705		√		√		√		√
Q01081		√		√	√	√	√	√
Q5T1Z8		√
Q9UHX1		√	√	√	√	√	√	√
Q12906		√	√	√	√	√	√	√
P21333		√	√		√	√	√	√
Q9Y4C8		√	√		√	√	√
Q9NUD5		√			√	√	√
Q9GZT3		√			√	√	√	√
P23246		√	√	√	√	√	√	√
Q13148		√	√	√	√	√	√	√
P30050		√		√	√	√	√	√
P62633		√		√	√	√	√	√
Q01085		√	√	√	√	√	√
Q13242		√	√	√	√	√	√	√
O75494		√	√	√	√	√	√	√
Q01130		√	√	√	√	√	√	√
B4DVB8		√
Q13884		√
Q15056		√		√	√	√	√	√
Q9Y678		√		√	√		√
G3XAD8		√
Q13283		√	√	√	√	√	√	√
Q00341		√		√	√	√	√	√
Q9C0B0		√			√	√
J3KTL2		√
P16989		√	√	√	√	√	√
Q9NYY8		√			√	√
P33240		√	√	√	√	√	√	√
P62753		√	√	√	√	√	√	√
Q04637		√	√	√	√	√	√	√
P61978		√	√	√	√	√	√	√
P46087		√	√	√	√	√	√	√
Q9NQ94		√
P31937		√					√
Q13813		√			√	√	√
P42677		√				√		√
Q9NY93		√	√	√	√	√	√	√
Q02543		√		√	√	√	√	√
P62805		√	√	√	√	√		√
Q9BZE1		√	√		√	√		√
P13489		√	√		√	√	√
Q8WW12		√					√
Q96T37		√	√	√	√	√	√
Q04837		√				√	√	√
Q8NE71		√	√	√	√	√	√	√
P11171		√					√
A0AV96		√		√		√
Q5BKZ1		√		√	√	√
P53618		√			√	√	√
Q92900		√		√	√	√	√	√
P30101		√	√	√	√	√	√	√
Q13409		√			√	√	√
P67809		√	√	√	√	√	√	√
Q9Y3U8		√		√		√	√	√
Q8NC51		√	√		√	√	√	√
Q8ND56		√		√	√	√	√
Q9H825		√				√
Q8WWM7		√		√	√	√	√	√
Q13310		√	√	√	√	√	√	√
P11940		√	√	√	√	√	√	√
Q01995		√	√			√
B4DG01		√
P11021		√			√	√	√
Q8N5C6		√				√	√
P26368		√	√	√	√	√	√	√
Q9Y2S6		√				√
P62316		√	√			√	√	√
P18621		√	√		√	√	√	√
Q9BQG0		√	√	√	√	√	√	√
Q6NUQ4		√				√
Q14103		√	√	√	√	√	√	√
P38646		√		√	√	√	√	√
P80723		√			√	√
Q86UE4		√			√	√	√	√
P25789		√					√
O75369		√			√	√	√	√
Q6ZN17		√				√	√
O60716		√			√	√	√
Q9NWU5		√				√
Q7L0Y3		√	√	√	√	√	√	√
Q9H9G7		√
B7Z4C8		√
Q13247		√	√	√	√	√	√	√
P15559		√		√				√
P06748		√	√	√	√	√	√	√
Q96EP5		√	√	√	√	√	√
P62318		√		√		√	√	√
P49406		√				√
Q9BRJ2		√			√	√
Q14258		√		√	√	√	√	√
Q00266		√
P60468		√			√	√
P43243		√	√	√		√	√	√
P46777		√		√	√	√	√	√
P40926		√	√	√		√	√	√
P55072		√	√	√	√	√	√	√
P09429		√		√	√	√		√
P07910		√	√	√	√	√	√	√
P51991		√	√	√	√	√	√	√
Q13595		√		√	√		√
Q9NY61		√			√	√	√
P22626		√	√	√	√	√	√	√
Q96DH6		√			√	√	√
D6W5Y5		√
Q14847		√		√	√	√
Q9P2M7		√					√
Q5RKV6		√				√
Q9H6T0		√				√
Q8WUH6		√
Q14444		√		√	√	√	√	√
H0YNJ6		√
Q6ZT89		√
O75367		√	√	√	√	√
Q13425		√			√
O43290		√	√		√	√	√
Q12926		√			√	√
P52756		√				√	√
Q15434		√			√	√
P62277		√	√	√	√	√	√	√
P07195		√	√	√	√	√	√
P62308		√				√	√
Q09666		√	√		√	√		√
Q9BSH4		√				√	√
Q92615		√		√	√	√	√	√
Q6IPX4		√
Q9BYD3		√			√	√
P26599		√	√	√	√	√	√	√
Q96A35		√			√	√		√
B4DT31		√
P61221		√			√	√	√
P46778		√	√	√	√	√	√	√
Q15424		√	√	√	√	√	√
P62942		√				√	√
P09972		√	√	√		√	√
Q6NW29		√					√
O43390		√	√	√	√	√	√	√
Q9UKM9		√	√	√	√	√	√	√
J3KPS0		√
D6W592		√
P39023		√	√	√	√	√	√	√
P46781		√	√	√	√	√	√	√
Q9NZ45		√				√
Q8N5K1		√
Q71RC2		√		√	√	√	√
P26583		√			√	√		√
Q8NCA5		√		√	√	√	√
P23284		√		√		√	√	√
Q12955		√			√		√
Q9GZZ1		√				√	√
P29401		√	√	√	√	√	√
Q9NUP9		√
Q08J23		√	√	√	√	√	√
Q96HC4		√			√	√	√
O60306		√	√	√	√	√	√
Q9BYG3		√	√	√	√	√	√	√
P06730		√				√	√	√
O75533		√	√	√	√	√	√	√
P30405		√					√
P17096		√			√	√		√
Q7KZF4		√	√	√	√	√	√	√
P51114		√	√	√	√	√	√	√
P04040		√				√
A8MUS3		√
Q05682		√			√	√	√
P24752		√		√	√		√
P17844		√	√	√	√	√	√	√
P60866		√		√	√	√	√	√
P11137		√
Q15427		√	√	√	√	√	√	√
Q96KC8		√				√
Q5JTH9		√	√	√	√	√	√	√
Q9NZB2		√	√	√	√	√	√
Q05519		√	√		√	√	√	√
Q14240		√				√	√
Q9BQ39		√	√	√	√	√	√
P60842		√	√	√	√	√	√	√
P62314		√				√	√	√
P05023		√		√	√	√
Q9BX66		√
O75122		√			√		√
Q9BQ48		√				√
O76021		√	√	√	√	√	√	√
P24043		√
P26885		√				√	√
Q9UN36		√					√
Q12996		√	√			√	√
Q4U2R6		√				√
O60812		√				√
Q9NVS2		√			√	√
P23193		√			√	√	√
Q00839		√	√	√	√	√	√	√
P05387		√			√	√	√
Q9H7B2		√			√	√	√	√
O95758		√		√	√	√
P14625		√				√	√	√
O43768		√				√	√
Q9P0M9		√				√
Q86WV7		√
P37802		√	√	√	√	√	√
Q96KP4		√			√		√
P17987		√	√	√	√	√	√	√
P46937		√					√
P46782		√	√	√	√	√	√	√
P50502		√		√			√
P55145		√			√	√	√	√
P31689		√			√	√	√
O76094		√			√	√	√	√
P35241		√		√	√	√	√	√
P62847		√	√		√	√	√	√
O95985		√				√	√
P63173		√		√		√	√	√
P46779		√			√	√	√	√
P26639		√	√	√	√	√	√	√
O94979		√			√	√	√
Q9BYD1		√			√	√
Q86V81		√	√	√	√	√	√	√
Q13442		√			√	√	√	√
P13010		√	√	√	√	√	√	√
Q9Y5M8		√		√		√
Q9Y2W2		√			√	√	√
Q8IWR0		√			√	√	√
Q92804		√		√	√	√	√
Q7LFL8		√
Q6P087		√				√
Q9UMX0		√					√
Q92616		√		√	√	√	√	√
P05455		√	√	√	√	√	√	√
P30040		√		√			√
P61313		√	√	√	√	√	√	√
P07814		√		√	√	√	√	√
Q13823		√	√		√	√	√
P46821		√			√	√	√
O60271		√			√	√	√
O43903		√
P10599		√	√			√	√	√
Q14157		√		√	√	√	√	√
Q9UQ35		√	√	√	√	√		√
P09661		√	√			√	√	√
P46776		√	√	√	√	√	√	√
Q14498		√	√	√	√	√	√	√
O75380		√
P62888		√		√	√	√	√	√
Q6PKG0		√		√	√	√	√	√
P06733		√	√	√	√	√	√	√
Q14562		√	√		√	√	√
P98175		√	√	√	√	√	√
Q9Y5K5		√	√				√	√
B4DSS8		√
Q9BZE4		√	√	√	√	√	√	√
Q86U38		√	√	√	√	√	√
D3DQV9		√
Q05707		√
P04843		√		√		√		√
P02545		√	√	√	√	√	√
Q03001		√			√	√	√
Q29RF7		√	√		√	√	√
Q9Y606		√				√	√
Q15032		√			√	√
Q9Y2K5		√				√
Q9BWF3		√	√	√	√	√	√
Q96EY7		√	√		√	√	√
Q13084		√			√	√
O00267		√	√		√	√	√
Q9BY77		√	√		√	√	√
P27816		√	√	√	√	√	√	√
P62829		√	√	√	√	√	√	√
Q7Z406		√			√	√	√
Q02878		√	√	√	√	√	√	√
P61604		√				√	√	√
Q9UNP9		√				√	√
Q02252		√				√
Q6P1L8		√				√
Q5VV67		√				√
Q8WXF1		√	√	√	√	√	√	√
P16070		√				√
P42166		√	√		√		√
Q96P11		√	√		√	√	√
O75152		√	√	√	√	√	√
P11586		√	√		√	√	√
P15924		√			√	√	√	√
Q08752		√			√		√
P07237		√	√	√	√	√	√	√
Q99497		√	√	√	√		√	√
Q9UJU6		√			√		√
Q9Y3D5		√				√
Q06830		√	√	√		√	√	√
P31946		√	√	√	√	√	√
P46459		√			√		√
Q96HN2		√				√
P04792		√	√	√	√	√		√
P61081		√			√		√
P49419		√			√		√
Q92974		√			√	√	√
P54277		√
Q99572		√
P02511		√
P55060		√	√		√	√	√
Q8IVH4		√
P10645		√
Q9UHB6		√			√	√	√
Q9Y223		√
P08670		√	√	√		√	√
P49792		√	√		√	√	√	√
P49591		√			√	√	√
P31153		√		√	√		√
Q14241		√	√		√	√	√
P61011		√				√	√	√
Q9H444		√				√	√
O95639		√		√		√
P10515		√			√
Q16836		√				√	√
Q9Y2V2		√
P51911		√
Q5T0F9		√
P35221		√	√		√	√	√	√
Q9UEY8		√					√
P10636		√
P53597		√				√	√	√
Q96RR5		√
P78371		√	√	√	√	√	√
P84098		√	√	√	√	√	√	√
Q05209		√			√		√
Q99442		√			√
Q9BRU9		√				√
P82912		√				√
P62266		√			√	√	√	√
P20774		√
Q13347		√			√	√	√	√
P23528		√	√	√	√	√	√
Q9NSD9		√			√	√	√	√
Q9H1E3		√			√	√	√	√
Q92688		√			√		√
Q16181		√			√		√
Q9Y2R9		√	√		√	√		√
Q13561		√					√
Q86TG7		√				√
P25440		√			√	√	√
Q9Y221		√				√	√	√
Q92597		√			√		√
Q9ULP0		√
P35555		√
P60002		√
Q9NUL5		√				√
P04054		√
P09622		√		√	√	√	√
Q9NW64		√	√		√	√	√
P15531		√		√	√	√	√	√
P11142		√	√		√	√	√	√
Q99798		√			√	√	√
P43897		√				√	√
B4DNJ6		√
P28799		√
O94804		√					√
P35998		√	√		√		√
Q14247		√			√	√	√
Q9BY67		√				√
P10412		√			√	√	√
O95684		√					√
Q9UNZ2		√					√
Q5H945		√
Q9HBL0		√
Q15637		√	√	√	√	√	√	√
P07585		√
Q9C0C2		√			√	√	√
P55196		√			√	√	√
Q8N6U8		√
Q8WUM4		√		√	√	√	√
Q96KR1		√	√	√	√	√	√
P63104		√	√	√	√	√	√	√
P15170		√			√	√	√	√
O14828		√			√
Q9P2W9		√
Q9UIG0		√	√		√	√	√
P62328		√				√		√
P55263		√					√	√
Q13087		√
P48735		√				√	√
P11182		√
Q9H095		√
P62263		√	√	√	√	√	√	√
Q15291		√					√
Q9UHR5		√					√
Q12904		√			√	√	√	√
Q9NX63		√
P40925		√		√	√		√
P55259		√
Q9UHB7		√			√	√	√
Q9Y2X3		√	√	√	√	√	√	√
P78527			√	√	√	√	√	√
Q14980			√	√		√	√
Q9NU22			√		√	√	√
P33993			√		√	√	√
P53396			√	√	√	√	√
P49736			√		√	√	√
Q15393			√		√	√	√
P25205			√	√	√	√	√
P09874			√	√	√	√	√	√
Q14566			√	√	√	√	√
Q86VP6			√	√	√	√	√
Q7L014			√	√	√	√	√	√
Q9H583			√	√	√	√	√	√
Q9Y490			√	√	√	√	√
P33992			√	√	√	√	√
Q16531			√		√	√	√
P22314			√	√	√	√	√	√
Q15029			√	√	√	√	√	√
P35579			√		√	√	√	√
P04083			√	√	√	√	√
P78347			√		√	√	√
Q9Y2L1			√		√	√	√	√
O95071			√		√	√	√
Q9UNX4			√	√	√	√	√	√
O14980			√	√	√	√	√	√
P33991			√	√	√		√
P52701			√		√		√
Q9H0A0			√	√	√	√	√	√
Q9H6R4			√		√	√	√
Q7KZ85			√	√	√	√	√
Q13435			√	√	√	√	√	√
Q00610			√		√	√	√	√
Q15717			√	√	√	√	√	√
Q8IY81			√	√	√	√	√	√
P28340			√		√		√
Q99460			√		√	√	√
O00231			√				√
P08133			√	√	√	√	√
P34932			√		√	√	√
Q14974			√	√	√	√	√	√
P00338			√	√	√	√	√
P00558			√	√	√	√	√
P46940			√	√	√	√	√
P42285			√		√	√	√	√
P51532			√		√	√	√
O43707			√	√	√	√	√	√
P26358			√		√	√	√	√
P55786			√		√	√	√
Q13200			√		√	√	√
Q9UKN8			√		√		√
Q9NTJ3			√	√	√	√	√
P50990			√		√	√	√
Q99459			√		√	√	√	√
P58107			√		√	√
P43246			√		√	√	√
P42224			√		√		√
Q9Y5B9			√		√	√	√	√
Q99848			√	√	√	√	√	√
Q5VYK3			√		√	√	√
O95373			√	√	√	√	√
P18858			√				√
Q9NYH9			√		√	√
P04075			√	√		√	√	√
Q13535			√		√
Q9NVI1			√		√	√	√
P09884			√		√		√
Q9Y2W1			√	√	√	√	√	√
P18206			√	√	√	√	√
P12429			√		√
Q9BZZ5			√	√	√	√	√	√
Q92499			√	√	√	√	√	√
Q9BUQ8			√	√	√	√	√
Q12789			√		√	√	√
O43242			√			√	√
Q14683			√		√	√	√	√
Q9BXP5			√	√	√	√	√	√
Q92973			√	√	√	√	√	√
P08758			√			√	√
P49368			√	√	√	√	√	√
Q92620			√			√	√
P26641			√	√	√	√	√
O00541			√	√	√	√	√	√
Q07864			√		√	√	√
Q16401			√		√
Q15008			√		√	√	√
Q13263			√	√	√	√	√	√
O14981			√		√	√	√
O00571			√	√	√	√	√	√
Q96AE4			√	√	√	√	√	√
Q9BVP2			√	√	√	√	√	√
P52292			√	√	√	√	√	√
Q8WX92			√				√
Q8IZL8			√		√	√
Q15459			√		√	√	√	√
O95347			√		√	√	√
Q12788			√		√	√		√
Q8NI36			√		√	√	√	√
P31939			√		√	√	√
Q9UBB4			√		√	√	√
Q14137			√	√	√	√	√	√
Q9HB07			√			√	√
Q8IX12			√		√	√	√	√
Q10570			√		√	√	√
Q8TEX9			√	√	√	√	√
Q13423			√	√	√	√
O75694			√	√		√	√
Q9Y263			√		√	√	√
Q99873			√	√	√	√	√	√
Q13523			√		√	√	√
Q9Y230			√		√	√	√
Q2TAY7			√		√	√	√
P18583			√	√	√	√	√	√
Q2NL82			√		√	√	√
P45974			√	√	√	√	√
Q93009			√	√	√	√	√
Q8IWA0			√		√	√	√
Q99832			√	√	√	√	√
Q03701			√	√	√	√	√
Q9H2U1			√	√	√	√	√
O95239			√		√		√
Q15021			√	√	√	√	√
Q92878			√		√	√	√
Q92797			√		√	√	√
P52888			√		√		√
Q16881			√	√	√	√	√
O60701			√	√			√
Q86XP3			√		√	√	√	√
Q5VTE0			√
P49915			√		√	√	√
Q9BUJ2			√	√	√	√	√	√
Q9Y4W2			√		√	√	√
P30041			√	√	√	√	√
Q63HN8			√		√	√	√
Q9HCS7			√		√		√
Q14839			√		√	√	√
Q69YN4			√		√	√	√
P30153			√	√	√		√
O00232			√				√
Q15020			√	√	√	√	√	√
Q8NI27			√	√	√	√	√	√
Q12888			√		√	√	√
Q14146			√		√	√	√
Q9UIA9			√		√	√	√
P61201			√				√
Q13616			√				√
O00410			√		√	√	√	√
Q9HCE1			√	√	√	√	√
Q86XI2			√		√	√	√
Q9H8H0			√			√	√	√
Q8N1F7			√		√	√	√
O43395			√		√	√	√
Q8WWY3			√		√	√	√	√
P17980			√		√		√
P47897			√		√	√	√
Q6IN85			√				√
Q9NXF1			√		√	√	√
Q02880			√		√	√	√
O15213			√	√	√	√
O43592			√	√	√	√	√
O75534			√	√	√	√	√	√
Q6PD62			√		√	√	√
P39748			√			√	√
O14929			√		√		√
Q92598			√	√	√	√	√
P09960			√		√	√	√	√
Q92621			√		√	√	√
O43252			√				√
Q9NTI5			√				√
P47712			√			√	√
Q9NTZ6			√		√	√	√	√
P49756			√	√	√	√	√	√
P35249			√				√
P35237			√		√	√	√
Q9UBT2			√		√		√
O95155			√		√		√
O75717			√		√	√	√
P62258			√	√	√	√	√	√
O60293			√		√	√	√
P48643			√	√	√	√	√
Q9NXV6			√		√	√	√
Q9H8H2			√	√		√	√
Q68CQ4			√			√	√
Q5QJE6			√		√	√	√
Q9BXW9			√			√
Q16658			√	√	√	√	√	√
Q9Y5Q9			√		√	√	√
O15397			√		√		√
Q4G0J3			√		√	√	√
P52209			√	√	√	√	√
Q9P258			√	√	√	√	√	√
P46063			√			√	√
Q9Y3Z3			√				√
Q9H4L4			√		√	√	√
O60264			√		√	√	√
Q07955			√	√	√	√	√	√
P37837			√				√
O15042			√	√	√	√	√
Q9HAV4			√	√	√	√	√
O43684			√	√	√	√	√
Q969X6			√			√
Q9H6R0			√			√
Q8IY37			√		√	√	√
Q5SSJ5			√		√	√	√
O15294			√				√
O43172			√		√		√
Q9Y265			√		√	√	√
P36952			√			√
P08621			√	√	√	√	√	√
P19623			√		√		√
Q9NXH9			√	√	√	√	√
P10155			√		√	√	√	√
Q9Y4A5			√		√	√	√
Q8TED0			√	√	√	√		√
P49750			√		√	√	√
P23526			√	√	√	√	√
Q8WYA6			√				√
Q13617			√				√
P22087			√	√	√	√	√	√
P36776			√		√	√	√
Q9H9A6			√			√	√
O94776			√		√		√
P42695			√		√	√	√
O15067			√		√	√	√
O95602			√		√	√	√
P30876			√	√	√	√	√	√
Q5UIP0			√		√	√	√
P62244			√	√	√	√	√	√
O14776			√		√	√	√	√
P50995			√		√	√		√
Q9UQ88			√			√
O00299			√	√	√	√	√
Q9BTC0			√		√	√	√
Q9UNQ2			√			√	√
P63241			√	√		√	√	√
Q8NEZ5			√				√
Q9Y5Q8			√			√	√
Q16666			√		√	√
P49917			√
Q13564			√				√
Q9BPX3			√		√	√	√
Q09161			√		√	√	√	√
Q96FW1			√		√	√	√
Q8N7H5			√		√	√	√
Q9NQ55			√	√	√	√	√
P62195			√		√		√
P62333			√		√		√
Q8IY67			√	√	√	√	√
Q07020			√	√	√	√		√
Q96P16			√		√		√
Q92922			√		√		√
P40763			√			√	√
Q14669			√		√	√	√
Q14166			√		√	√	√
Q9NQW6			√		√		√
Q13895			√		√	√	√	√
Q92879			√	√	√	√	√
Q9BT78			√				√
Q13620			√		√	√	√
Q69YN2			√			√	√
Q13838			√	√	√	√	√	√
Q52LJ0			√	√	√	√	√	√
Q02790			√		√	√	√	√
O60684			√		√		√
Q93074			√		√		√
P49321			√	√	√	√	√
P00491			√				√
O00411			√	√	√	√
Q99575			√	√	√	√	√
Q9UMS4			√	√	√	√	√
Q5JSZ5			√		√	√	√
Q9UNM6			√				√
P18754			√		√	√	√
Q9Y2P8			√			√
P35250			√				√
P40938			√			√	√
O75150			√		√		√
P40429			√	√	√	√	√	√
P32969			√	√		√	√	√
P62249			√	√	√	√	√	√
Q8N3U4			√			√	√
Q96HA7			√		√		√
Q9P275			√		√	√	√
Q7Z5K2			√		√		√
P24666			√		√	√	√
P09525			√
Q13315			√		√
P38606			√		√		√
Q02413			√			√
P51610			√		√	√	√
Q8WVV9			√	√	√	√	√	√
Q99714			√	√	√	√	√	√
O95757			√				√
Q96P70			√		√	√	√
Q9UNF1			√	√	√	√	√
P49959			√		√		√
Q5SY16			√		√	√	√
Q9UQ80			√	√	√	√	√	√
Q13177			√		√	√	√
Q53EL6			√		√	√	√
P24928			√		√	√	√	√
O15355			√		√	√	√
P62191			√	√	√	√	√	√
O60518			√		√		√
P18124			√	√	√	√	√	√
O43159			√	√	√	√
Q13309			√				√
Q13501			√		√		√
P0DMV9			√			√		√
P49748			√		√
P30566			√		√		√
Q9ULX6			√	√	√	√	√
Q6PJG6			√		√		√
Q9Y6E2			√		√	√	√
Q16543			√		√	√	√
P06493			√			√	√
Q9UKF6			√		√		√	√
Q9BZJ0			√			√	√
O00148			√	√		√	√	√
O60832			√	√	√	√	√	√
Q99615			√		√	√	√
P29692			√		√	√	√
Q9Y262			√	√	√	√	√	√
Q13868			√			√	√
P07954			√		√	√	√
P04406			√	√	√	√	√
Q13098			√				√
Q9NRZ9			√		√		√
O60341			√				√
P49916			√		√	√	√
O60244			√		√
Q9UBP6			√				√
Q9BYT8			√				√
P04150			√		√
O95478			√		√	√
P22234			√	√	√	√	√
O95340			√				√
P49005			√				√
Q9H9Y6			√		√		√
Q96QC0			√		√	√	√
P49643			√				√
P27635			√	√	√	√	√	√
P61353			√		√	√	√	√
P62851			√		√	√	√	√
P82979			√			√	√	√
P63162			√					√
Q9UNS1			√				√
Q7Z2T5			√	√	√	√	√
P62987			√			√
Q53GS9			√				√
Q9Y5J1			√		√	√	√
Q6PJT7			√		√	√	√
P59998			√	√			√
O75909			√		√		√
Q9UNS2			√			√	√
Q13618			√			√	√
Q13206			√		√	√	√
Q9Y2R4			√	√	√	√	√
P23919			√				√
P33316			√	√	√		√	√
P78344			√	√	√	√	√	√
Q7L775			√
P11413			√	√	√	√	√
Q04446			√		√		√
P57678			√		√	√	√
O76003			√		√		√	√
O94925			√		√
P09211			√	√			√
Q96G21			√			√
O43813			√			√	√
Q9Y2X0			√		√
Q86W50			√	√		√	√
Q96T76			√	√	√		√
P40261			√
O14818			√	√		√	√
P55036			√		√		√	√
O60216			√			√	√
P54136			√	√	√	√	√
P35251			√			√	√
P40937			√				√
Q5VT52			√		√	√	√
P06702			√			√
Q02978			√			√		√
Q9GZL7			√			√	√
Q9H845			√			√
P68133			√			√
P11766			√		√		√
P25311			√			√
Q7L1Q6			√	√		√	√	√
Q13185			√	√	√	√	√
O75419			√			√	√
P24941			√				√
P11802			√		√	√	√
P13804			√		√	√	√
Q01469			√		√	√	√
P51570			√				√
Q9H0C8			√			√	√
O95232			√	√	√	√	√	√
P28482			√		√		√
P23368			√				√
Q9NVV4			√		√	√
P60660			√		√	√	√
Q9Y314			√		√	√	√	√
Q5SRE5			√		√	√	√
Q9Y5B6			√				√
P32119			√	√		√	√
P30044			√	√	√		√
Q15287			√		√		√	√
P62913			√		√	√	√	√
Q9NQG5			√				√
Q99590			√	√	√	√	√
P53999			√		√	√		√
Q96GM8			√	√	√	√	√
Q15785			√		√		√
Q92547			√		√		√
Q9H0U9			√			√	√
P11172			√				√
Q9Y4B6			√		√		√
Q8WXE1			√
P52907			√	√	√		√
Q86WJ1			√				√
Q99829			√	√			√
P56545			√				√
P30084			√			√	√
Q14320			√			√	√
Q71DI3			√	√		√
Q9Y383			√		√	√		√
O75448			√
P22392			√	√			√
Q9UBD5			√			√
P12004			√	√	√	√	√
P11177			√		√		√
Q9GZS1			√			√
Q9BUI4			√				√
P48556			√				√
P61289			√				√
P32322			√
P05388			√	√	√	√	√	√
Q96T23			√		√	√
Q9UBE0			√				√
Q96P63			√			√
P37108			√	√		√	√	√
Q13769			√				√
Q12792			√		√	√	√
P54578			√		√	√	√
Q9BV38			√		√	√	√
O43670			√	√	√	√	√	√
Q14011			√		√	√	√	√
Q7Z4Q2			√		√	√	√
Q9NVR2			√
Q9NR56				√	√	√	√	√
Q9UKA9				√		√
P35268				√	√	√	√	√
Q96QD9				√		√
P62304				√		√	√	√
Q9Y2T7				√		√
P62280				√	√	√	√	√
Q9UBU9				√	√	√	√
O43251				√		√
Q99880				√
P62826				√	√	√	√	√
Q9NZ01				√		√
Q96N66				√		√
P61964				√	√		√
P60953				√		√	√
P57088				√		√
P48634				√	√	√	√
Q9UN86				√	√	√	√	√
P62834				√		√
Q16630				√	√	√	√	√
P12236				√		√
P35610				√	√
P00966				√	√		√
Q969Z0				√		√
O60831				√		√
Q6P158				√	√	√	√
P61803				√		√
O15260				√		√
P48651				√		√
O14880				√
P63000				√		√	√
O15427				√		√		√
P07737				√	√	√	√	√
P27695				√	√	√	√	√
Q9Y277				√		√
P84077				√		√	√	√
Q9UBM7				√		√
Q92979				√		√	√	√
O43660				√	√	√
Q01650				√
P28288				√		√
P62081				√	√	√	√	√
Q9UH17				√		√
P31949				√	√		√
Q5JVF3				√			√
P49720				√			√
P41252				√	√	√	√
Q96AG4				√	√	√	√	√
P63151				√	√	√	√
P17931				√	√	√		√
P20810				√	√	√	√	√
Q14019				√			√
P68104				√		√	√	√
O95782				√	√		√
P52434				√
P28074				√		√	√
P49773				√			√
Q00325				√	√	√
P04080				√	√	√	√	√
P46977				√		√
P07741				√		√	√
P51149				√		√	√
P61619				√		√
P61106				√	√	√
Q15758				√		√
P61026				√	√	√
P21796				√	√	√
P00492				√	√		√
O75396				√		√
P48047				√
Q9Y266				√	√	√	√
P55769				√		√	√	√
Q8IZ69				√	√		√
P45880				√	√	√
P25787				√		√	√
Q13162				√		√	√
P56537				√	√	√	√
P08243				√	√	√	√
O00764				√			√
Q9P035				√		√
P50454				√		√	√	√
Q9HB71				√	√	√	√
Q15181				√	√	√	√
Q9Y6C9				√		√
Q9UI30				√		√	√
P42330				√
Q9Y617				√	√		√
P67936				√		√	√
P41091				√	√	√	√
Q05639				√		√	√
P06744				√	√		√
P52565				√	√	√	√
P17812				√	√	√	√
P18669				√	√		√
P43487				√	√	√	√
Q9BTD8				√	√	√	√
P39656				√	√	√
P61457				√			√
O95573				√	√	√
P14550				√		√	√
O43776				√	√	√	√
P0DMV8				√			√
Q12769				√	√	√	√
Q9BY44				√	√	√	√
O75390				√	√	√	√	√
P68366				√	√
P31040				√	√	√	√
Q96QK1				√	√		√
P26640				√	√	√	√
P09923				√
P60174				√	√	√	√
Q01518				√	√	√	√
P12277				√		√	√
Q9UBQ0				√			√
P51571				√
Q9H4A4				√	√		√
P68402				√	√		√
P60900				√		√	√	√
P61158				√	√		√
P05386				√	√		√
P27348				√	√	√	√
P16152				√			√
P56192				√	√	√	√	√
P53992				√	√		√
P08195				√		√		√
P49588				√	√	√	√	√
P23381				√	√	√	√
Q13057				√
P41250				√	√	√	√
P51659				√	√
Q15046				√	√	√	√
O00159				√	√	√	√
Q9BRJ6				√		√	√
P35613				√		√
P27824				√	√	√	√	√
Q9Y2T3				√		√
P00505				√	√	√	√	√
O14744				√	√	√	√
P35232				√	√	√
P08865				√	√	√	√	√
P43034				√		√	√
P62879				√
Q9ULV4				√	√	√	√
Q9UHD1				√	√		√
Q9P2J5				√	√	√	√
Q9Y3F4				√	√	√	√	√
Q16555				√	√		√
P14923				√		√
P13797				√	√	√	√
Q05048				√	√	√	√
Q96G46				√	√	√	√
Q9NQR4				√			√
P50416				√		√
Q15084				√	√	√	√
P27797				√		√	√	√
P50552				√	√		√
P50395				√	√	√	√	√
P34897				√	√	√	√
P23921				√	√	√	√
P07437				√	√	√	√
Q5VYS8				√		√	√
Q01813				√		√	√
Q15436				√	√	√	√
P01891				√
Q2TB90				√
Q9BWM7				√
P11279				√		√	√
P25786				√		√	√
P55884				√	√	√	√	√
Q14204				√	√	√	√	√
A0AVT1					√		√
A1L390					√
A1X283					√
A2RRP1					√
A4D1P6					√
A5YKK6					√	√	√
A6NHR9					√	√	√
A7KAX9					√
O00116					√
O00139					√	√	√
O00151					√		√
O00154					√		√
O00170					√		√
O00178					√	√	√
O00193					√	√
O00203					√	√	√
O00233					√		√
O00273					√		√
O00291					√
O00443					√		√
O00505					√	√	√
O00560					√		√
O00566					√	√	√
O00629					√		√
O14497					√
O14578					√
O14617					√	√	√
O14639					√
O14646					√	√	√
O14686					√	√	√
O14777					√		√
O14787					√	√	√
O14802					√		√
O14908					√
O14964					√		√
O14974					√		√
O14976					√		√
O15020					√
O15027					√	√	√
O15047					√	√
O15145					√		√
O15164					√		√
O15231					√
O15318					√		√
O15347					√	√		√
O15357					√
O15372					√	√	√	√
O43149					√		√
O43156					√		√
O43166					√	√
O43237					√		√
O43264					√	√	√
O43379					√		√
O43396					√	√	√
O43432					√	√	√
O43491					√	√	√
O43583					√	√	√
O43663					√	√	√
O43683					√		√
O43765					√		√
O43795					√		√
O43815					√		√
O43847					√		√
O60292					√
O60313					√
O60318					√
O60333					√	√	√
O60343					√		√
O60488					√
O60566					√		√
O60610					√		√
O60664					√	√	√
O60828					√	√	√
O60884					√		√
O60885					√	√	√
O60942					√
O75083					√	√	√
O75116					√	√	√
O75131					√	√		√
O75146					√
O75147					√	√	√
O75153					√	√	√
O75165					√	√
O75170					√
O75319					√	√
O75376					√		√
O75400					√	√	√	√
O75427					√
O75439					√		√
O75569					√	√	√
O75592					√		√
O75665					√	√
O75688					√		√
O75822					√	√	√
O75937					√	√	√
[truncated: 2,921 more rows]
