# Supplementary material for: An approach for the systematic profiling of drug-induced remodeling of RNA–RBP (RNA-binding protein) interactions
Source: Royal Society of Chemistry journal article supplement (doi:10.1039/d6ra00871b), 2026-05-19
Supplement: d6ra00871b5.xlsx [file d6ra00871b5.xlsx]

## Sheet: Table S5
Table S5. Altered RBPs upon MS-444 treatment
Uniprot accession	Gene Symbol	-Log(BH-ajusted P-value）	Log2 FC_RBPome	Log2 FC_global proteome	Log2 FC_corrected
O15371	EIF3D	5.72094	-4.14414	0.0754024	-4.21954
Q15417	CNN3	2.64895	-3.8312	-0.0503815	-3.78082
P24752	ACAT1	1.81129	-2.58392	0.160738	-2.74466
P11233	RALA	4.4049	-2.63018	0.0447242	-2.67491
P14406	COX7A2	2.2938	-2.26543	0.189513	-2.45495
P48735	IDH2	1.82763	-2.32591	0.0829082	-2.40882
P63096	GNAI1	4.4566	-2.29848	0.1063	-2.40478
Q01844	EWSR1	1.63654	-2.3	0.0916283	-2.39163
Q99729	HNRNPAB	2.33471	-2.36274	-0.0857059	-2.27703
P20340	RAB6A	2.52637	-2.07441	0.129741	-2.20415
P32322	PYCR1	2.3374	-1.84796	0.230403	-2.07836
O75494	SRSF10	3.70476	-1.96655	0.0919265	-2.05848
Q9NVI7	ATAD3A	1.41581	-1.94483	0.0984082	-2.04323
P11216	PYGB	4.16317	-2.08825	-0.0600816	-2.02816
Q9H583	HEATR1	1.77177	-1.93199	0.0492506	-1.98124
O60762	DPM1	4.14019	-1.7802	0.186392	-1.96659
P21912	SDHB	4.14021	-1.8676	0.0727356	-1.94034
P20042	EIF2S2	2.98768	-2.05326	-0.13085	-1.92241
P31150	GDI1	4.21233	-2.0369	-0.117616	-1.91928
P49589	CARS1	1.42912	-1.87013	-0.0338597	-1.83627
P29373	CRABP2	1.92186	-1.71102	0.119892	-1.83091
Q8WXF1	PSPC1	2.44867	-1.68618	0.117959	-1.80414
Q15102	PAFAH1B3	2.17847	-1.8105	-0.0089756	-1.80153
Q9UBQ7	GRHPR	1.83679	-1.78526	-0.0139251	-1.77134
Q13561	DCTN2	3.03617	-1.80455	-0.0338661	-1.77068
Q9Y3D9	MRPS23	1.33649	-1.73843	0.0157347	-1.75416
Q15717	ELAVL1	3.06739	-1.53159	0.219773	-1.75136
Q14558	PRPSAP1	1.88237	-1.70977	0.0367421	-1.74651
P57088	TMEM33	2.0917	-1.74152	-0.0100591	-1.73146
P19367	HK1	2.89386	-1.73004	-0.0244941	-1.70555
Q9Y3Y2	CHTOP	1.31062	-1.43191	0.266108	-1.69802
P48147	PREP	3.84558	-1.75043	-0.0573238	-1.6931
Q9UKK9	NUDT5	2.88696	-1.70524	-0.0219503	-1.68329
Q99439	CNN2	2.20793	-1.53958	0.139295	-1.67887
P54709	ATP1B3	1.85418	-1.63701	0.0362047	-1.67321
P26368	U2AF2	3.67825	-1.74417	-0.0813651	-1.6628
P05556	ITGB1	1.50724	-1.59259	0.0647276	-1.65732
O94826	TOMM70	2.72562	-1.61781	0.036523	-1.65433
Q96A33	CCDC47	2.92699	-1.52919	0.0973848	-1.62658
Q99436	PSMB7	1.87865	-1.55069	0.0719369	-1.62263
P78347	GTF2I	2.58179	-1.46918	0.139378	-1.60856
P06737	PYGL	2.23494	-1.66837	-0.0602858	-1.60808
Q12907	LMAN2	3.71906	-1.54258	0.0646351	-1.60722
P27708	CAD	2.25663	-1.63392	-0.0378545	-1.59606
Q9P0L0	VAPA	1.89301	-1.58996	-0.000203262	-1.58975
P33992	MCM5	1.96876	-1.51782	0.050295	-1.56812
Q9NZM1	MYOF	2.35407	-1.51019	0.0519146	-1.5621
P06493	CDK1	1.97707	-1.63113	-0.0793862	-1.55175
P31689	DNAJA1	1.88337	-1.53223	0.00122499	-1.53345
Q96QK1	VPS35	3.25646	-1.63425	-0.122948	-1.5113
P17612	PRKACA	1.33916	-1.56997	-0.0621645	-1.50781
Q92973	TNPO1	2.93724	-1.52685	-0.0246103	-1.50224
Q9Y2W1	THRAP3	3.96836	-1.56604	-0.0889344	-1.4771
P37802	TAGLN2	2.11009	-1.37296	0.100906	-1.47387
Q9NZ45	CISD1	2.44505	-1.30406	0.127685	-1.43175
P05161	ISG15	2.23145	-1.46783	-0.0437142	-1.42412
Q9UN86	G3BP2	1.84958	-1.28821	0.127917	-1.41613
P46776	RPL27A	2.4167	-1.27517	0.13069	-1.40586
P60900	PSMA6	1.40325	-1.26652	0.135416	-1.40194
P37837	TALDO1	1.82666	-1.34804	0.0374916	-1.38553
Q9NR12	PDLIM7	1.62003	-1.2907	0.0902578	-1.38096
Q99627	COPS8	2.85843	-1.30419	0.0715161	-1.37571
Q16643	DBN1	1.38565	-1.45677	-0.0986603	-1.35811
P59998	ARPC4	2.60421	-1.31578	0.0422764	-1.35806
Q9Y3F4	STRAP	3.53552	-1.43115	-0.0930081	-1.33814
Q12792	TWF1	1.66178	-1.42494	-0.0896728	-1.33526
Q6ZMU5	TRIM72	2.25903	-1.39207	-0.0681925	-1.32388
Q5SSJ5	HP1BP3	1.60771	-1.12545	0.192798	-1.31824
P83731	RPL24	2.96079	-1.22631	0.090217	-1.31652
Q13813	SPTAN1	2.43437	-1.37492	-0.0598651	-1.31506
P26639	TARS1	2.34571	-1.30049	-0.00892695	-1.29156
Q96DI7	SNRNP40	1.64915	-1.30771	-0.0216167	-1.28609
Q9BXJ9	NAA15	1.73764	-1.28678	-0.0081605	-1.27862
P60983	GMFB	2.47593	-1.29261	-0.0179891	-1.27462
Q7L0Y3	TRMT10C	1.79195	-1.1983	0.0633311	-1.26163
P22695	UQCRC2	1.48743	-1.1616	0.0809935	-1.24259
Q9BVP2	GNL3	2.98435	-1.16923	0.0631852	-1.23241
P47813	EIF1AX	2.53082	-1.18957	0.0377018	-1.22727
P39656	DDOST	2.45226	-1.1441	0.0707368	-1.21483
Q9UNZ2	NSFL1C	1.49088	-1.32252	-0.110152	-1.21237
Q12874	SF3A3	1.53737	-1.24841	-0.0445632	-1.20385
Q14204	DYNC1H1	1.96311	-1.25238	-0.0558127	-1.19657
P61221	ABCE1	1.87475	-1.21854	-0.0276144	-1.19093
P50454	SERPINH1	2.98503	-1.13795	0.0517012	-1.18965
Q86VP6	CAND1	2.12859	-1.18374	-0.00514455	-1.17859
P07384	CAPN1	1.47132	-1.22932	-0.0632834	-1.16604
Q14697	GANAB	2.37368	-1.10784	0.0534857	-1.16133
P56537	EIF6	1.4916	-1.16736	-0.0079926	-1.15936
O75369	FLNB	2.20925	-1.14127	0.0106965	-1.15196
O00422	SAP18	1.63253	-1.09852	0.0481213	-1.14664
O95232	LUC7L3	1.59315	-1.12398	0.00791332	-1.1319
O00541	PES1	1.5144	-1.06514	0.050489	-1.11563
O43488	AKR7A2	1.97652	-1.12323	-0.0169597	-1.10627
Q15393	SF3B3	1.73055	-1.03306	0.0538133	-1.08687
P23526	AHCY	1.56404	-0.990207	0.0690082	-1.05921
P08754	GNAI3	3.04614	-1.05372	0.00475279	-1.05848
Q9NTK5	OLA1	2.10043	-1.10916	-0.0565596	-1.0526
P30153	PPP2R1A	1.89731	-0.996287	0.0409171	-1.0372
O43242	PSMD3	1.7342	-1.03615	-0.00116892	-1.03498
P54725	RAD23A	2.25063	-0.936941	0.0832324	-1.02017
P07814	EPRS1	2.05028	-1.01294	0.00449293	-1.01744
P61916	NPC2	1.3701	-0.813419	0.190094	-1.00351
P28072	PSMB6	2.19759	1.00122	-0.0264851	1.0277
Q12849	GRSF1	1.31354	1.02289	-0.0740114	1.0969
O75400	PRPF40A	2.3472	1.05391	-0.0494304	1.10334
P31040	SDHA	1.6025	1.20301	0.0692132	1.13379
Q9H7Z7	PTGES2	2.3231	1.44953	0.111347	1.33819
P55769	SNU13	2.23481	1.55039	0.181804	1.36858
Q03135	CAV1	1.38942	1.26701	-0.103541	1.37055
Q9Y6M1	IGF2BP2	3.22787	1.51418	0.0880945	1.42608
P46109	CRKL	1.3845	1.36647	-0.0611479	1.42762
Q9NYL9	TMOD3	1.95363	1.50726	-0.12887	1.63613
Q86UP2	KTN1	4.02463	1.68812	-0.0234942	1.71162
P18031	PTPN1	3.26786	1.8171	0.102502	1.71459
Q6P5R6	RPL22L1	4.08643	2.00313	0.038323	1.9648
P42167	TMPO	1.52114	2.23214	0.0603555	2.17178
P05165	PCCA	5.09841	3.41363	0.046007	3.36762
