# Supplementary material for: An approach for the systematic profiling of drug-induced remodeling of RNA–RBP (RNA-binding protein) interactions
Source: Royal Society of Chemistry journal article supplement (doi:10.1039/d6ra00871b), 2026-05-19
Supplement: d6ra00871b6.xlsx [file d6ra00871b6.xlsx]

## Sheet: Table S6
Table S6. PPI network of HuR (ELAVL1)-interacting RBPs
Node1	Node2	Experimentally_determined	Textmining	Coexpression	Homology	Combined_score
ELAVL1	RALA	0	0.45	0.049	0	0.454
ELAVL1	SF3B3	0	0.232	0.342	0	0.473
ELAVL1	U2AF2	0.238	0.418	0.663	0.579	0.837
ELAVL1	TNPO1	0.091	0.313	0.257	0	0.495
ELAVL1	PSPC1	0.329	0.135	0.096	0.587	0.43
ELAVL1	RPL27A	0	0	0.43	0	0.43
ELAVL1	G3BP2	0.045	0.404	0.16	0	0.481
ELAVL1	ITGB1	0	0.475	0.049	0	0.479
ELAVL1	SAP18	0	0.07	0.536	0	0.55
ELAVL1	SRSF10	0.092	0.384	0.377	0	0.621
ELAVL1	EWSR1	0.231	0.374	0.482	0	0.729
ELAVL1	HNRNPAB	0.234	0.49	0.397	0.578	0.744
ELAVL1	CDK1	0	0.537	0.085	0	0.558
ELAVL1	CHTOP	0	0	0.684	0	0.684
ELAVL1	CRABP2	0	0.738	0.054	0	0.741
ELAVL1	EIF2S2	0	0.447	0.169	0	0.52
