# Supplementary material for: An approach for the systematic profiling of drug-induced remodeling of RNA–RBP (RNA-binding protein) interactions
Source: Royal Society of Chemistry journal article supplement (doi:10.1039/d6ra00871b), 2026-05-19
Supplement: d6ra00871b7.xlsx [file d6ra00871b7.xlsx]

## Sheet: Cover
Table S7. List of identified RBPs from risdiplam-treated and untreated HEK293T cells
Table S7a. All identified RBPs from risdiplam-treated and untreated HEK293T cells
Table S7b. Identified RBPs from risdiplam-treated HEK293T cells
Table S7c. Identified RBPs from untreated HEK293T cells

## Sheet: Table S7a
Table S7a. All identified RBPs from risdiplam-treated and untreated HEK293T cells
Uniprot accession	Gene Symbol	Drug treatment	Non treatment
P62942	FKBP1A	√	√
P61019	RAB2A	√	√
Q93009	USP7	√	√
Q9Y3C6	PPIL1	√	√
P58546	MTPN	√	√
P21281	ATP6V1B2	√	√
Q14165	MLEC	√	√
P61224	RAP1B	√	√
O00487	PSMD14	√	√
P30044	PRDX5	√	√
O00767	SCD	√	√
P62140	PPP1CB	√	√
P62979	RPS27A	√	√
P42677	RPS27	√	√
P20073	ANXA7	√	√
P62857	RPS28	√	√
P60866	RPS20	√	√
P04080	CSTB	√	√
P35080	PFN2	√	√
P18077	RPL35A	√	√
P22392	NME2	√	√
P07437	TUBB	√	√
Q16778	H2BC21	√	√
Q9H6Z4	RANBP3	√	√
Q9NR31	SAR1A	√	√
O75663	TIPRL	√	√
Q9GZT3	SLIRP	√	√
O95299	NDUFA10	√	√
Q9NP79	VTA1	√	√
P67936	TPM4	√	√
P30040	ERP29	√	√
Q9UKD2	MRTO4	√	√
P10606	COX5B	√	√
Q15819	UBE2V2	√	√
P08579	SNRPB2	√	√
Q06124	PTPN11	√	√
P05114	HMGN1	√	√
P30085	CMPK1	√	√
Q68E01	INTS3	√	√
P62306	SNRPF	√	√
P46063	RECQL	√	√
P53992	SEC24C	√	√
Q9UBC2	EPS15L1	√	√
Q9NX14	NDUFB11	√	√
Q13576	IQGAP2	√	√
Q9UBE0	SAE1	√	√
Q07866	KLC1	√	√
Q5JRA6	MIA3	√	√
Q13601	KRR1	√	√
P21283	ATP6V1C1	√	√
P07384	CAPN1	√	√
P05091	ALDH2	√	√
O95218	ZRANB2	√	√
Q9H6T3	RPAP3	√	√
P43246	MSH2	√	√
P55145	MANF	√	√
O75083	WDR1	√	√
P28331	NDUFS1	√	√
Q9HB07	MYG1	√	√
Q15102	PAFAH1B3	√	√
P35520	CBS	√	√
P31350	RRM2	√	√
Q00535	CDK5	√	√
Q9NR50	EIF2B3	√	√
P99999	CYCS	√	√
Q0VDF9	HSPA14	√	√
Q9H223	EHD4	√	√
Q9Y2R5	MRPS17	√	√
Q9P289	STK26	√	√
P29992	GNA11	√	√
Q9C0C9	UBE2O	√	√
Q9NQ88	TIGAR	√	√
Q9ULX6	AKAP8L	√	√
Q86Y82	STX12	√	√
Q9H2W6	MRPL46	√	√
Q99614	TTC1	√	√
Q6L8Q7	PDE12	√	√
Q9BV86	NTMT1	√	√
Q9BUF5	TUBB6	√	√
O60762	DPM1	√	√
P22059	OSBP	√	√
Q6P1J9	CDC73	√	√
O00442	RTCA	√	√
Q9UBI6	GNG12	√	√
P11310	ACADM	√	√
Q99426	TBCB	√	√
P21912	SDHB	√	√
Q9UHV9	PFDN2	√	√
P54920	NAPA	√	√
Q15293	RCN1	√	√
P48739	PITPNB	√	√
O00217	NDUFS8	√	√
P30519	HMOX2	√	√
P08047	SP1	√	√
Q8WW12	PCNP	√	√
P84157	MXRA7	√	√
Q9NPI6	DCP1A	√	√
P51665	PSMD7	√	√
Q13442	PDAP1	√	√
P11216	PYGB	√	√
P11766	ADH5	√	√
O43765	SGTA	√	√
P55327	TPD52	√	√
P37840	SNCA	√	√
O43504	LAMTOR5	√	√
O00193	SMAP	√	√
Q15785	TOMM34	√	√
P61106	RAB14	√	√
P54727	RAD23B	√	√
P06493	CDK1	√	√
Q9Y3B9	RRP15	√	√
P48556	PSMD8	√	√
Q9UBW8	COPS7A	√	√
Q6IBS0	TWF2	√	√
P61158	ACTR3	√	√
O43399	TPD52L2	√	√
Q15843	NEDD8	√	√
O75964	ATP5MG	√	√
Q92979	EMG1	√	√
Q9NPJ3	ACOT13	√	√
P60900	PSMA6	√	√
Q9H1E3	NUCKS1	√	√
P30405	PPIF	√	√
Q86U42	PABPN1	√	√
O00148	DDX39A	√	√
O75531	BANF1	√	√
P12235	SLC25A4	√	√
Q9NX55	HYPK	√	√
P62318	SNRPD3	√	√
P09972	ALDOC	√	√
Q9UJS0	SLC25A13	√	√
P06730	EIF4E	√	√
O43670	ZNF207	√	√
O75683	SURF6	√	√
Q9NSE4	IARS2	√	√
Q01081	U2AF1	√	√
P18085	ARF4	√	√
P63208	SKP1	√	√
P52209	PGD	√	√
Q04917	YWHAH	√	√
P09651	HNRNPA1	√	√
Q9H3K6	BOLA2	√	√
P63000	RAC1	√	√
P23588	EIF4B	√	√
P62081	RPS7	√	√
Q9Y2R9	MRPS7	√	√
P62873	GNB1	√	√
P12236	SLC25A6	√	√
Q01650	SLC7A5	√	√
P35659	DEK	√	√
P08754	GNAI3	√	√
P00390	GSR	√	√
Q92530	PSMF1	√	√
Q16576	RBBP7	√	√
P63173	RPL38	√	√
Q8WU90	ZC3H15	√	√
P42766	RPL35	√	√
P14174	MIF	√	√
P61088	UBE2N	√	√
P61803	DAD1	√	√
Q13243	SRSF5	√	√
P30086	PEBP1	√	√
O15355	PPM1G	√	√
P35611	ADD1	√	√
P49755	TMED10	√	√
P54819	AK2	√	√
P62847	RPS24	√	√
Q8TC12	RDH11	√	√
Q15637	SF1	√	√
P35268	RPL22	√	√
Q09028	RBBP4	√	√
Q53GQ0	HSD17B12	√	√
Q13595	TRA2A	√	√
Q96FW1	OTUB1	√	√
Q7L1Q6	BZW1	√	√
O95292	VAPB	√	√
P48735	IDH2	√	√
O60884	DNAJA2	√	√
P63010	AP2B1	√	√
P13073	COX4I1	√	√
Q14019	COTL1	√	√
Q86V81	ALYREF	√	√
O00154	ACOT7	√	√
P84085	ARF5	√	√
O75874	IDH1	√	√
Q96IZ0	PAWR	√	√
P35637	FUS	√	√
Q8N8S7	ENAH	√	√
O00273	DFFA	√	√
P02786	TFRC	√	√
Q9H3P7	ACBD3	√	√
P48147	PREP	√	√
Q9NPH2	ISYNA1	√	√
P20810	CAST	√	√
Q99567	NUP88	√	√
Q93050	ATP6V0A1	√	√
P82673	MRPS35	√	√
Q7Z4Q2	HEATR3	√	√
Q5JTV8	TOR1AIP1	√	√
Q9Y4W6	AFG3L2	√	√
Q16555	DPYSL2	√	√
Q9UJU6	DBNL	√	√
P55735	SEC13	√	√
Q02952	AKAP12	√	√
Q96K17	BTF3L4	√	√
P21266	GSTM3	√	√
Q96HC4	PDLIM5	√	√
Q9BSH4	TACO1	√	√
O75955	FLOT1	√	√
Q5JTZ9	AARS2	√	√
Q9NQT5	EXOSC3	√	√
A6NDG6	PGP	√	√
P00568	AK1	√	√
Q6PI48	DARS2	√	√
P30837	ALDH1B1	√	√
P15374	UCHL3	√	√
O43396	TXNL1	√	√
O43719	HTATSF1	√	√
P15927	RPA2	√	√
O00629	KPNA4	√	√
P08574	CYC1	√	√
O95251	KAT7	√	√
Q9HAV7	GRPEL1	√	√
Q12792	TWF1	√	√
Q92797	SYMPK	√	√
P12814	ACTN1	√	√
P78406	RAE1	√	√
Q9BS26	ERP44	√	√
Q9NYU2	UGGT1	√	√
Q9UNS2	COPS3	√	√
P20618	PSMB1	√	√
Q16740	CLPP	√	√
O14745	NHERF1	√	√
Q96ST3	SIN3A	√	√
P10515	DLAT	√	√
O60313	OPA1	√	√
P37198	NUP62	√	√
P15170	GSPT1	√	√
P84095	RHOG	√	√
P53701	HCCS	√	√
Q5TDH0	DDI2	√	√
P31150	GDI1	√	√
P49419	ALDH7A1	√	√
Q9BW92	TARS2	√	√
O75832	PSMD10	√	√
P42126	ECI1	√	√
Q01469	FABP5	√	√
P43686	PSMC4	√	√
Q12849	GRSF1	√	√
P16989	YBX3	√	√
P36957	DLST	√	√
O14744	PRMT5	√	√
P45973	CBX5	√	√
Q6DD88	ATL3	√	√
P43034	PAFAH1B1	√	√
A1L0T0	ILVBL	√	√
Q96I99	SUCLG2	√	√
Q9UBT2	UBA2	√	√
P25787	PSMA2	√	√
P67775	PPP2CA	√	√
P22061	PCMT1	√	√
O75947	ATP5PD	√	√
P63220	RPS21	√	√
Q15008	PSMD6	√	√
Q3ZCQ8	TIMM50	√	√
O75390	CS	√	√
Q96P16	RPRD1A	√	√
P62854	RPS26	√	√
P19105	MYL12A	√	√
P11413	G6PD	√	√
P60660	MYL6	√	√
O95433	AHSA1	√	√
P15531	NME1	√	√
Q9UBU9	NXF1	√	√
Q9UNM6	PSMD13	√	√
P61619	SEC61A1	√	√
P55769	SNU13	√	√
O43837	IDH3B	√	√
P62899	RPL31	√	√
Q9H910	JPT2	√	√
Q9NX20	MRPL16	√	√
P23284	PPIB	√	√
P43897	TSFM	√	√
P39656	DDOST	√	√
P61513	RPL37A	√	√
Q9BVI4	NOC4L	√	√
Q15366	PCBP2	√	√
P53985	SLC16A1	√	√
P61353	RPL27	√	√
Q71UI9	H2AZ2	√	√
P83731	RPL24	√	√
Q9P035	HACD3	√	√
Q13838	DDX39B	√	√
P55084	HADHB	√	√
P15311	EZR	√	√
P54578	USP14	√	√
P24534	EEF1B2	√	√
O95861	BPNT1	√	√
O00505	KPNA3	√	√
P49006	MARCKSL1	√	√
P43487	RANBP1	√	√
Q05519	SRSF11	√	√
P24752	ACAT1	√	√
P46783	RPS10	√	√
Q13618	CUL3	√	√
P61289	PSME3	√	√
P84090	ERH	√	√
Q13242	SRSF9	√	√
Q15459	SF3A1	√	√
P52907	CAPZA1	√	√
P52815	MRPL12	√	√
Q92688	ANP32B	√	√
Q16527	CSRP2	√	√
P23526	AHCY	√	√
O14818	PSMA7	√	√
Q92522	H1-10	√	√
O00139	KIF2A	√	√
P50579	METAP2	√	√
Q8IY67	RAVER1	√	√
Q13409	DYNC1I2	√	√
Q8IZL8	PELP1	√	√
P13861	PRKAR2A	√	√
P35269	GTF2F1	√	√
Q8WUA2	PPIL4	√	√
O95747	OXSR1	√	√
P06737	PYGL	√	√
P57740	NUP107	√	√
P00491	PNP	√	√
P47755	CAPZA2	√	√
Q8TCS8	PNPT1	√	√
Q96F86	EDC3	√	√
P49189	ALDH9A1	√	√
O95336	PGLS	√	√
Q15020	SART3	√	√
Q15019	SEPTIN2	√	√
Q15369	ELOC	√	√
Q9UNZ2	NSFL1C	√	√
O75822	EIF3J	√	√
P36871	PGM1	√	√
P27105	STOM	√	√
Q9UMX0	UBQLN1	√	√
Q9UKY7	CDV3	√	√
Q9BRJ6	CHLSN	√	√
O15258	RER1	√	√
Q96CX2	KCTD12	√	√
P23381	WARS1	√	√
Q13561	DCTN2	√	√
Q8TEM1	NUP210	√	√
P41227	NAA10	√	√
Q16531	DDB1	√	√
P68036	UBE2L3	√	√
Q01813	PFKP	√	√
O14737	PDCD5	√	√
O43264	ZW10	√	√
P39748	FEN1	√	√
P62191	PSMC1	√	√
O94905	ERLIN2	√	√
P31942	HNRNPH3	√	√
P62913	RPL11	√	√
P30050	RPL12	√	√
P50914	RPL14	√	√
Q9H9B4	SFXN1	√	√
P55036	PSMD4	√	√
P25398	RPS12	√	√
P26038	MSN	√	√
O60216	RAD21	√	√
P00387	CYB5R3	√	√
P36542	ATP5F1C	√	√
P39019	RPS19	√	√
Q5T8P6	RBM26	√	√
O15347	HMGB3	√	√
P27695	APEX1	√	√
P78347	GTF2I	√	√
O76003	GLRX3	√	√
P57088	TMEM33	√	√
Q13347	EIF3I	√	√
P10599	TXN	√	√
Q9Y383	LUC7L2	√	√
P09936	UCHL1	√	√
Q5SY16	NOL9	√	√
Q16630	CPSF6	√	√
Q9ULV4	CORO1C	√	√
P62263	RPS14	√	√
P62851	RPS25	√	√
Q14258	TRIM25	√	√
O75396	SEC22B	√	√
Q15365	PCBP1	√	√
P13804	ETFA	√	√
P60891	PRPS1	√	√
P50502	ST13	√	√
P11171	EPB41	√	√
P53007	SLC25A1	√	√
P52597	HNRNPF	√	√
P32969	RPL9	√	√
Q13620	CUL4B	√	√
Q13185	CBX3	√	√
P61254	RPL26	√	√
P49591	SARS1	√	√
Q9BWF3	RBM4	√	√
P54709	ATP1B3	√	√
P19623	SRM	√	√
P53597	SUCLG1	√	√
P24666	ACP1	√	√
P08758	ANXA5	√	√
P52565	ARHGDIA	√	√
P37837	TALDO1	√	√
Q13155	AIMP2	√	√
P35606	COPB2	√	√
P40925	MDH1	√	√
P00505	GOT2	√	√
Q16629	SRSF7	√	√
Q01105	SET	√	√
Q9NS69	TOMM22	√	√
P05783	KRT18	√	√
Q8N1G4	LRRC47	√	√
O95163	ELP1	√	√
P07954	FH	√	√
P41214	EIF2D	√	√
Q96P70	IPO9	√	√
Q86Y56	DNAAF5	√	√
Q9Y4L1	HYOU1	√	√
O43865	AHCYL1	√	√
P62316	SNRPD2	√	√
Q9Y6G9	DYNC1LI1	√	√
Q9BQ67	GRWD1	√	√
O00151	PDLIM1	√	√
Q9NQC3	RTN4	√	√
P35613	BSG	√	√
P06454	PTMA	√	√
P11177	PDHB	√	√
Q13162	PRDX4	√	√
Q96QK1	VPS35	√	√
Q96AE4	FUBP1	√	√
Q12904	AIMP1	√	√
P48047	ATP5PO	√	√
O75821	EIF3G	√	√
P05141	SLC25A5	√	√
P27635	RPL10	√	√
P63241	EIF5A	√	√
P49207	RPL34	√	√
Q02978	SLC25A11	√	√
P30876	POLR2B	√	√
P46776	RPL27A	√	√
P62269	RPS18	√	√
Q16643	DBN1	√	√
P62910	RPL32	√	√
Q99497	PARK7	√	√
P42167	TMPO	√	√
P29966	MARCKS	√	√
Q9NVU7	SDAD1	√	√
P62829	RPL23	√	√
P29692	EEF1D	√	√
Q13564	NAE1	√	√
P62750	RPL23A	√	√
Q96CS3	FAF2	√	√
P08708	RPS17	√	√
O00232	PSMD12	√	√
P00918	CA2	√	√
Q9NX58	LYAR	√	√
P08237	PFKM	√	√
P00367	GLUD1	√	√
Q96RP9	GFM1	√	√
Q16850	CYP51A1	√	√
Q92552	MRPS27	√	√
Q8IYB3	SRRM1	√	√
Q9Y450	HBS1L	√	√
O94826	TOMM70	√	√
P31946	YWHAB	√	√
Q12905	ILF2	√	√
O00231	PSMD11	√	√
Q09161	NCBP1	√	√
P04181	OAT	√	√
P62937	PPIA	√	√
Q7Z4W1	DCXR	√	√
P51858	HDGF	√	√
P16152	CBR1	√	√
Q96PZ0	PUS7	√	√
Q07021	C1QBP	√	√
O95602	POLR1A	√	√
P09661	SNRPA1	√	√
P05387	RPLP2	√	√
P62633	CNBP	√	√
P61981	YWHAG	√	√
O43395	PRPF3	√	√
Q13573	SNW1	√	√
P22695	UQCRC2	√	√
P62826	RAN	√	√
P62277	RPS13	√	√
P05198	EIF2S1	√	√
P18621	RPL17	√	√
P30041	PRDX6	√	√
P60228	EIF3E	√	√
P78344	EIF4G2	√	√
P46977	STT3A	√	√
Q53H12	AGK	√	√
O00116	AGPS	√	√
Q8WXF1	PSPC1	√	√
P31153	MAT2A	√	√
Q9UMS4	PRPF19	√	√
P35232	PHB1	√	√
Q9Y617	PSAT1	√	√
Q99848	EBNA1BP2	√	√
Q9Y678	COPG1	√	√
Q13123	IK	√	√
O00299	CLIC1	√	√
P08865	RPSA	√	√
Q14978	NOLC1	√	√
Q99615	DNAJC7	√	√
Q96A33	CCDC47	√	√
Q9UJZ1	STOML2	√	√
O60832	DKC1	√	√
P04844	RPN2	√	√
O75152	ZC3H11A	√	√
P28838	LAP3	√	√
P12004	PCNA	√	√
O14979	HNRNPDL	√	√
P31040	SDHA	√	√
P09211	GSTP1	√	√
Q9BYG3	NIFK	√	√
Q14157	UBAP2L	√	√
P42166	TMPO	√	√
P50395	GDI2	√	√
Q14247	CTTN	√	√
Q8WUH6	TMEM263	√	√
Q06830	PRDX1	√	√
P48444	ARCN1	√	√
P62249	RPS16	√	√
P40429	RPL13A	√	√
Q99733	NAP1L4	√	√
Q02543	RPL18A	√	√
P84098	RPL19	√	√
P37802	TAGLN2	√	√
P61313	RPL15	√	√
Q00325	SLC25A3	√	√
Q07020	RPL18	√	√
P33991	MCM4	√	√
Q92499	DDX1	√	√
P51149	RAB7A	√	√
P62805	H4C1	√	√
Q9UGP8	SEC63	√	√
P09960	LTA4H	√	√
Q14103	HNRNPD	√	√
P55786	NPEPPS	√	√
Q9Y295	DRG1	√	√
P0DMV9	HSPA1B	√	√
Q9BXJ9	NAA15	√	√
P08621	SNRNP70	√	√
Q7Z3K3	POGZ	√	√
Q07955	SRSF1	√	√
P04637	TP53	√	√
Q96C36	PYCR2	√	√
P26368	U2AF2	√	√
P46060	RANGAP1	√	√
P22102	GART	√	√
Q15084	PDIA6	√	√
P46459	NSF	√	√
Q12874	SF3A3	√	√
P05388	RPLP0	√	√
Q9Y266	NUDC	√	√
P52948	NUP98	√	√
Q9BQ52	ELAC2	√	√
P32322	PYCR1	√	√
O95831	AIFM1	√	√
P09429	HMGB1	√	√
Q9Y277	VDAC3	√	√
Q8TEQ6	GEMIN5	√	√
P18669	PGAM1	√	√
Q5QJE6	DNTTIP2	√	√
P34897	SHMT2	√	√
P29401	TKT	√	√
P60174	TPI1	√	√
P12277	CKB	√	√
Q9BY77	POLDIP3	√	√
P31943	HNRNPH1	√	√
P00338	LDHA	√	√
P46779	RPL28	√	√
P26373	RPL13	√	√
P62753	RPS6	√	√
Q14566	MCM6	√	√
P55209	NAP1L1	√	√
P42696	RBM34	√	√
P41091	EIF2S3	√	√
P17812	CTPS1	√	√
P52292	KPNA2	√	√
P26639	TARS1	√	√
Q9Y262	EIF3L	√	√
Q9Y230	RUVBL2	√	√
P22087	FBL	√	√
P23528	CFL1	√	√
P22234	PAICS	√	√
Q7Z2W4	ZC3HAV1	√	√
Q16658	FSCN1	√	√
P48634	PRRC2A	√	√
Q8WTT2	NOC3L	√	√
Q07666	KHDRBS1	√	√
Q96AG4	LRRC59	√	√
P06748	NPM1	√	√
O75367	MACROH2A1	√	√
Q15393	SF3B3	√	√
O43491	EPB41L2	√	√
P27824	CANX	√	√
Q00341	HDLBP	√	√
Q9BPX3	NCAPG	√	√
P67809	YBX1	√	√
O96008	TOMM40	√	√
Q9P258	RCC2	√	√
Q7L0Y3	TRMT10C	√	√
P46782	RPS5	√	√
P14868	DARS1	√	√
Q9UHB9	SRP68	√	√
P62917	RPL8	√	√
P62241	RPS8	√	√
P56182	RRP1	√	√
P60842	EIF4A1	√	√
Q15717	ELAVL1	√	√
P23921	RRM1	√	√
Q9BXP5	SRRT	√	√
Q92598	HSPH1	√	√
P51659	HSD17B4	√	√
P27348	YWHAQ	√	√
Q5BKZ1	ZNF326	√	√
P61221	ABCE1	√	√
P25705	ATP5F1A	√	√
Q8NI36	WDR36	√	√
Q9H6R4	NOL6	√	√
Q12788	TBL3	√	√
Q9Y3F4	STRAP	√	√
P40939	HADHA	√	√
P08195	SLC3A2	√	√
P07737	PFN1	√	√
P63104	YWHAZ	√	√
Q99623	PHB2	√	√
P06576	ATP5F1B	√	√
O95202	LETM1	√	√
Q9Y3T9	NOC2L	√	√
P49588	AARS1	√	√
Q92973	TNPO1	√	√
P12268	IMPDH2	√	√
P15880	RPS2	√	√
P04843	RPN1	√	√
P07900	HSP90AA1	√	√
P63244	RACK1	√	√
P07195	LDHB	√	√
Q9NZI8	IGF2BP1	√	√
P31689	DNAJA1	√	√
P20042	EIF2S2	√	√
Q99714	HSD17B10	√	√
Q96PK6	RBM14	√	√
Q08945	SSRP1	√	√
P26599	PTBP1	√	√
Q14C86	GAPVD1	√	√
O15371	EIF3D	√	√
P07237	P4HB	√	√
Q6PKG0	LARP1	√	√
Q13435	SF3B2	√	√
P27797	CALR	√	√
Q99613	EIF3C	√	√
P18124	RPL7	√	√
P62280	RPS11	√	√
P46781	RPS9	√	√
Q9UG63	ABCF2	√	√
O94906	PRPF6	√	√
P04406	GAPDH	√	√
Q12931	TRAP1	√	√
P62701	RPS4X	√	√
O15226	NKRF	√	√
Q9Y2X3	NOP58	√	√
Q14974	KPNB1	√	√
P30101	PDIA3	√	√
Q9BVP2	GNL3	√	√
Q9BVJ6	UTP14A	√	√
Q14498	RBM39	√	√
P45880	VDAC2	√	√
Q99459	CDC5L	√	√
Q8NE71	ABCF1	√	√
P07910	HNRNPC	√	√
P04075	ALDOA	√	√
P06733	ENO1	√	√
Q15029	EFTUD2	√	√
Q13428	TCOF1	√	√
P31939	ATIC	√	√
O43175	PHGDH	√	√
P46777	RPL5	√	√
O95373	IPO7	√	√
P26641	EEF1G	√	√
Q8N1F7	NUP93	√	√
P54577	YARS1	√	√
O95347	SMC2	√	√
Q9UQ80	PA2G4	√	√
Q02878	RPL6	√	√
P39023	RPL3	√	√
P48643	CCT5	√	√
O00410	IPO5	√	√
Q01780	EXOSC10	√	√
P13010	XRCC5	√	√
O76094	SRP72	√	√
Q9Y265	RUVBL1	√	√
O75400	PRPF40A	√	√
Q14203	DCTN1	√	√
P62258	YWHAE	√	√
P19338	NCL	√	√
Q96KR1	ZFR	√	√
Q8WUM4	PDCD6IP	√	√
Q86XP3	DDX42	√	√
P62424	RPL7A	√	√
P40227	CCT6A	√	√
P61247	RPS3A	√	√
P43243	MATR3	√	√
P31948	STIP1	√	√
P22626	HNRNPA2B1	√	√
P49411	TUFM	√	√
Q9HAV4	XPO5	√	√
P33992	MCM5	√	√
O00541	PES1	√	√
P49321	NASP	√	√
P00558	PGK1	√	√
P23396	RPS3	√	√
Q9Y2L1	DIS3	√	√
P23246	SFPQ	√	√
P11387	TOP1	√	√
P78371	CCT2	√	√
Q03701	CEBPZ	√	√
P12956	XRCC6	√	√
O60506	SYNCRIP	√	√
P38919	EIF4A3	√	√
P11021	HSPA5	√	√
P25205	MCM3	√	√
Q9H307	PNN	√	√
Q8NC51	SERBP1	√	√
Q13263	TRIM28	√	√
P13667	PDIA4	√	√
O43242	PSMD3	√	√
Q9P2J5	LARS1	√	√
P49736	MCM2	√	√
P53618	COPB1	√	√
P08238	HSP90AB1	√	√
Q07065	CKAP4	√	√
P36578	RPL4	√	√
P51610	HCFC1	√	√
O43390	HNRNPR	√	√
Q99832	CCT7	√	√
P49368	CCT3	√	√
P33993	MCM7	√	√
P14866	HNRNPL	√	√
Q15424	SAFB	√	√
P21796	VDAC1	√	√
P17844	DDX5	√	√
P50990	CCT8	√	√
O14980	XPO1	√	√
Q86VP6	CAND1	√	√
P46940	IQGAP1	√	√
Q7KZF4	SND1	√	√
Q9NYF8	BCLAF1	√	√
Q01082	SPTBN1	√	√
Q92841	DDX17	√	√
O00571	DDX3X	√	√
Q92945	KHSRP	√	√
P22314	UBA1	√	√
O60264	SMARCA5	√	√
P26640	VARS1	√	√
Q9BZE4	GTPBP4	√	√
Q8IY81	FTSJ3	√	√
P54886	ALDH18A1	√	√
P61978	HNRNPK	√	√
O14654	IRS4	√	√
P55265	ADAR	√	√
Q15233	NONO	√	√
P14625	HSP90B1	√	√
Q99575	POP1	√	√
P11586	MTHFD1	√	√
P54136	RARS1	√	√
P55060	CSE1L	√	√
P13797	PLS3	√	√
O75534	CSDE1	√	√
P53621	COPA	√	√
P17987	TCP1	√	√
O76021	RSL1D1	√	√
P10809	HSPD1	√	√
P14618	PKM	√	√
Q7L2E3	DHX30	√	√
Q9Y5B9	SUPT16H	√	√
P52272	HNRNPM	√	√
Q00839	HNRNPU	√	√
P11142	HSPA8	√	√
Q04637	EIF4G1	√	√
P08670	VIM	√	√
P53396	ACLY	√	√
Q9Y490	TLN1	√	√
P41252	IARS1	√	√
Q16891	IMMT	√	√
Q14152	EIF3A	√	√
Q14683	SMC1A	√	√
P27708	CAD	√	√
Q5UIP0	RIF1	√	√
P05023	ATP1A1	√	√
P11388	TOP2A	√	√
P34932	HSPA4	√	√
P20700	LMNB1	√	√
P27816	MAP4	√	√
Q9UQ35	SRRM2	√	√
Q12906	ILF3	√	√
P42704	LRPPRC	√	√
P07814	EPRS1	√	√
Q00610	CLTC	√	√
P38646	HSPA9	√	√
Q08211	DHX9	√	√
P15924	DSP	√	√
Q4VCS5	AMOT	√	√
P13639	EEF2	√	√
O75643	SNRNP200	√	√
O75533	SF3B1	√	√
Q9BQG0	MYBBP1A	√	√
P21333	FLNA	√	√
Q14690	PDCD11	√	√
Q14839	CHD4	√	√
P09874	PARP1	√	√
Q9NR30	DDX21	√	√
Q6P2Q9	PRPF8	√	√
Q9H583	HEATR1	√	√
P35580	MYH10	√	√
P35579	MYH9	√	√
P49327	FASN	√	√
Q14204	DYNC1H1	√	√
P78527	PRKDC	√	√
Q9NWU5	MRPL22	√
Q03001	DST	√
Q9UL46	PSME2	√
Q15363	TMED2	√
O43447	PPIH	√
P50552	VASP	√
P40616	ARL1	√
Q7RTV0	PHF5A	√
O43896	KIF1C	√
Q92575	UBXN4	√
Q9NWQ8	PAG1	√
Q8WTS6	SETD7	√
P63098	PPP3R1	√
Q9BV79	MECR	√
Q13277	STX3	√
O43617	TRAPPC3	√
Q8N8A6	DDX51	√
Q14315	FLNC	√
P25490	YY1	√
O15344	MID1	√
O94808	GFPT2	√
O96000	NDUFB10	√
O95785	WIZ	√
Q9BW83	IFT27	√
Q9BRT3	MIEN1	√
Q9Y2R4	DDX52	√
Q13868	EXOSC2	√
O60610	DIAPH1	√
O95295	SNAPIN	√
Q9BRX5	GINS3	√
Q8NBJ7	SUMF2	√
P61020	RAB5B	√
Q9Y314	NOSIP	√
P16930	FAH	√
P48449	LSS	√
O43920	NDUFS5	√
P67812	SEC11A	√
Q9NRZ9	HELLS	√
Q16513	PKN2	√
Q9UHY1	NRBP1	√
Q9NQR4	NIT2	√
Q99611	SEPHS2	√
O14908	GIPC1	√
Q7L5D6	GET4	√
Q9H3G5	CPVL	√
Q8TD19	NEK9	√
P54619	PRKAG1	√
P02794	FTH1	√
Q00403	GTF2B	√
Q9BUT1	BDH2	√
P32780	GTF2H1	√
Q92896	GLG1	√
Q9BXW9	FANCD2	√
Q13948	CUX1	√
P16435	POR	√
Q8N7H5	PAF1	√
Q15435	PPP1R7	√
Q9Y3C8	UFC1	√
Q9Y4X5	ARIH1	√
Q8TEA8	DTD1	√
Q96M27	PRRC1	√
Q9BR76	CORO1B	√
P09110	ACAA1	√
Q9H0U6	MRPL18	√
Q02750	MAP2K1	√
Q13268	DHRS2	√
Q9UKN8	GTF3C4	√
P46926	GNPDA1	√
P35573	AGL	√
Q00765	REEP5	√
Q00169	PITPNA	√
Q5VT66	MTARC1	√
Q04206	RELA	√
Q7Z3B4	NUP54	√
Q96ST2	IWS1	√
Q9P032	NDUFAF4	√
Q8NFH5	NUP35	√
Q02224	CENPE	√
Q15437	SEC23B	√
P45954	ACADSB	√
P24928	POLR2A	√
Q96SB4	SRPK1	√
O15144	ARPC2	√
Q8N9T8	KRI1	√
Q9NRG9	AAAS	√
Q92572	AP3S1	√
Q92747	ARPC1A	√
Q13126	MTAP	√
Q5J8M3	EMC4	√
O43819	SCO2	√
Q9BYD6	MRPL1	√
O75794	CDC123	√
Q4VC31	MIX23	√
Q9NXH9	TRMT1	√
Q13501	SQSTM1	√
Q9H2P9	DPH5	√
Q69YN2	CWF19L1	√
O43488	AKR7A2	√
Q9H444	CHMP4B	√
Q8WVJ2	NUDCD2	√
Q9UBS4	DNAJB11	√
O00422	SAP18	√
O75179	ANKRD17	√
Q9H974	QTRT2	√
Q8IV08	PLD3	√
P22033	MMUT	√
O75352	MPDU1	√
Q9BYD2	MRPL9	√
Q9BUL9	RPP25	√
P60510	PPP4C	√
Q6NYC1	JMJD6	√
Q8NC96	NECAP1	√
P83916	CBX1	√
Q15018	ABRAXAS2	√
P27361	MAPK3	√
Q9NSI2	SLX9	√
Q8N6T3	ARFGAP1	√
P51452	DUSP3	√
Q9Y2Z4	YARS2	√
P01116	KRAS	√
Q15404	RSU1	√
P62070	RRAS2	√
Q9BRT9	GINS4	√
Q9Y248	GINS2	√
Q96B36	AKT1S1	√
Q9NY27	PPP4R2	√
Q9NQ50	MRPL40	√
Q9C0B1	FTO	√
Q96DB5	RMDN1	√
Q15007	WTAP	√
P35250	RFC2	√
Q16774	GUK1	√
Q9NZL4	HSPBP1	√
O43708	GSTZ1	√
Q99878	H2AC14	√
P13473	LAMP2	√
O00330	PDHX	√
P21926	CD9	√
P61009	SPCS3	√
Q8TAE8	GADD45GIP1	√
Q07812	BAX	√
O60684	KPNA6	√
O60502	OGA	√
Q13033	STRN3	√
Q8WY22	BRI3BP	√
Q9NZ45	CISD1	√
P01889	HLA-B	√
Q5RKV6	EXOSC6	√
Q96EY8	MMAB	√
P32929	CTH	√
P35222	CTNNB1	√
Q9BWU0	SLC4A1AP	√
Q9BQ75	CMSS1	√
P06132	UROD	√
O60888	CUTA	√
Q14558	PRPSAP1	√
Q9Y3Z3	SAMHD1	√
Q9UBV2	SEL1L	√
P11908	PRPS2	√
Q92820	GGH	√
Q12972	PPP1R8	√
P15586	GNS	√
O95168	NDUFB4	√
P52788	SMS	√
P41223	BUD31	√
P23919	DTYMK	√
Q9UBX3	SLC25A10	√
Q08257	CRYZ	√
Q9NX40	OCIAD1	√
Q9Y237	PIN4	√
P10155	RO60	√
O00560	SDCBP	√
P62877	RBX1	√
Q9H3K2	GHITM	√
P52926	HMGA2	√
O43598	DNPH1	√
O95456	PSMG1	√
Q7Z7H8	MRPL10	√
Q14671	PUM1	√
P35249	RFC4	√
Q9BZE1	MRPL37	√
O95881	TXNDC12	√
Q9Y333	LSM2	√
Q00577	PURA	√
P56385	ATP5ME	√
Q9Y221	NIP7	√
Q99720	SIGMAR1	√
P20839	IMPDH1	√
O00483	NDUFA4	√
Q9BYD3	MRPL4	√
O75348	ATP6V1G1	√
O75915	ARL6IP5	√
Q15427	SF3B4	√
O75380	NDUFS6	√
Q9HB40	SCPEP1	√
P59998	ARPC4	√
P04632	CAPNS1	√
O60925	PFDN1	√
P61970	NUTF2	√
O15479	MAGEB2	√
P62328	TMSB4X	√
P61960	UFM1	√
Q5SRD1	TIMM23B	√
P00374	DHFR	√
P18859	ATP5PF	√
P47813	EIF1AX	√
P00167	CYB5A	√
P36543	ATP6V1E1	√
Q9BQ69	MACROD1	√
P42771	CDKN2A	√
P63165	SUMO1	√
P17096	HMGA1	√
P49773	HINT1	√
Q01130	SRSF2	√
P61923	COPZ1	√
P49721	PSMB2	√
P09234	SNRPC	√
P62136	PPP1CA	√
Q969Q0	RPL36AL	√
P55795	HNRNPH2	√
P14406	COX7A2	√
Q15750	TAB1	√
Q3ZCM7	TUBB8	√
P62304	SNRPE	√
P61956	SUMO2	√
P84077	ARF1	√
P05386	RPLP1	√
O15020	SPTBN2	√
Q99584	S100A13	√
Q969H8	MYDGF	√
Q9H0A0	NAT10	√
P17612	PRKACA	√
O43290	SART1	√
Q02818	NUCB1	√
Q9ULA0	DNPEP	√
Q9P0L0	VAPA	√
O00764	PDXK	√
P52732	KIF11	√
P49643	PRIM2	√
Q9UJ83	HACL1	√
P98175	RBM10	√
Q92520	FAM3C	√
O75844	ZMPSTE24	√
Q3SY69	ALDH1L2	√
Q12797	ASPH	√
O75381	PEX14	√
Q9NYK5	MRPL39	√
Q53EL6	PDCD4	√
Q8WVY7	UBLCP1	√
Q9NYH9	UTP6	√
O15400	STX7	√
P61586	RHOA	√
Q16134	ETFDH	√
Q8IYS1	PM20D2	√
Q96EL3	MRPL53	√
O95817	BAG3	√
Q9NR33	POLE4	√
Q9H0U4	RAB1B	√
Q9UPN9	TRIM33	√
O60232	ZNRD2	√
Q96HE7	ERO1A	√
P49770	EIF2B2	√
P31937	HIBADH	√
Q96GK7	FAHD2A	√
Q8NFH3	NUP43	√
Q9NRH3	TUBG2	√
Q9NY33	DPP3	√
Q9H9A6	LRRC40	√
O00429	DNM1L	√
Q9NVX2	NLE1	√
P26885	FKBP2	√
Q9UHB6	LIMA1	√
Q9NYL9	TMOD3	√
O94788	ALDH1A2	√
Q9H993	ARMT1	√
P49903	SEPHS1	√
P53634	CTSC	√
O15116	LSM1	√
P51649	ALDH5A1	√
Q8WXX5	DNAJC9	√
Q9GZN8	ADISSP	√
Q9BXW7	HDHD5	√
Q9UH65	SWAP70	√
Q9NUQ3	TXLNG	√
Q14254	FLOT2	√
Q9NTJ5	SACM1L	√
P53004	BLVRA	√
Q9BYT8	NLN	√
O75312	ZPR1	√
Q15942	ZYX	√
P24941	CDK2	√
Q9UI12	ATP6V1H	√
P28161	GSTM2	√
Q8WWH5	TRUB1	√
O75607	NPM3	√
Q9Y371	SH3GLB1	√
Q96HY6	DDRGK1	√
P09455	RBP1	√
Q8N766	EMC1	√
P49589	CARS1	√
P49753	ACOT2	√
Q9BRA2	TXNDC17	√
Q9BWJ5	SF3B5	√
Q5T440	IBA57	√
Q9GZS3	SKIC8	√
P40855	PEX19	√
P41240	CSK	√
P82650	MRPS22	√
Q96TA2	YME1L1	√
P14209	CD99	√
Q86SX6	GLRX5	√
Q9UKF6	CPSF3	√
P61006	RAB8A	√
O60701	UGDH	√
Q9NTX5	ECHDC1	√
Q9Y3E5	PTRH2	√
Q6IAA8	LAMTOR1	√
P30043	BLVRB	√
Q99956	DUSP9	√
O43324	EEF1E1	√
P09132	SRP19	√
Q8WWY3	PRPF31	√
Q14651	PLS1	√
O95394	PGM3	√
P34949	MPI	√
P40938	RFC3	√
Q9Y2R0	COA3	√
Q9H8H0	NOL11	√
Q9BRP8	PYM1	√
Q9UBB4	ATXN10	√
Q13907	IDI1	√
Q14137	BOP1	√
P09543	CNP	√
P25325	MPST	√
P27144	AK4	√
Q99627	COPS8	√
P62879	GNB2	√
P61086	UBE2K	√
P04350	TUBB4A	√
Q9UN86	G3BP2	√
Q8N0X7	SPART	√
Q8NBU5	ATAD1	√
P51570	GALK1	√
Q9H7Z7	PTGES2	√
Q9Y5J7	TIMM9	√
Q13610	PWP1	√
Q99961	SH3GL1	√
Q9NVS9	PNPO	√
Q9Y2Q3	GSTK1	√
Q9H488	POFUT1	√
P48637	GSS	√
Q96AB3	ISOC2	√
Q16698	DECR1	√
Q13405	MRPL49	√
Q9Y6E2	BZW2	√
Q9UIJ7	AK3	√
Q9NQW7	XPNPEP1	√
Q15436	SEC23A	√
P11233	RALA	√
O00170	AIP	√
Q5TFE4	NT5DC1	√
Q8N4Q1	CHCHD4	√
Q96CN7	ISOC1	√
Q16881	TXNRD1	√
P61026	RAB10	√
Q9BSD7	NTPCR	√
P62993	GRB2	√
P60981	DSTN	√
P46976	GYG1	√
Q92769	HDAC2	√
P61916	NPC2	√
P50213	IDH3A	√
Q86W42	THOC6	√
Q9UMX5	NENF	√
Q99757	TXN2	√
Q9BV20	MRI1	√
Q5JTJ3	COA6	√
O75306	NDUFS2	√
P14927	UQCRB	√
O95777	LSM8	√
P23368	ME2	√
Q9NP97	DYNLRB1	√
Q96A26	FAM162A	√
P13995	MTHFD2	√
O43768	ENSA	√
P19388	POLR2E	√
Q12907	LMAN2	√
O95573	ACSL3	√
Q9NX63	CHCHD3	√
P20962	PTMS	√
P07339	CTSD	√
P54105	CLNS1A	√
P11279	LAMP1	√
O60493	SNX3	√
P14324	FDPS	√
P14550	AKR1A1	√
Q9Y3A6	TMED5	√
Q9Y5S9	RBM8A	√
O14929	HAT1	√
Q01844	EWSR1	√
P09496	CLTA	√
P43307	SSR1	√
Q9BQE3	TUBA1C	√
Q05639	EEF1A2	√
P49720	PSMB3	√
P82979	SARNP	√
P06753	TPM3	√
O95104	SCAF4	√
P00403	MT-CO2	√
P09417	QDPR	√
P11172	UMPS	√
Q96KP4	CNDP2	√
O94760	DDAH1	√
Q5JRX3	PITRM1	√
P33316	DUT	√
Q12996	CSTF3	√
Q9H845	ACAD9	√
Q9BRX2	PELO	√
Q9BQP7	MGME1	√
Q04760	GLO1	√
O96005	CLPTM1	√
Q969V3	NCLN	√
Q8IXI1	RHOT2	√
P40937	RFC5	√
Q9Y3D9	MRPS23	√
O94874	UFL1	√
P23786	CPT2	√
O14776	TCERG1	√
Q5JSH3	WDR44	√
P52306	RAP1GDS1	√
Q5H9R7	PPP6R3	√
P61201	COPS2	√
P06865	HEXA	√
Q15003	NCAPH	√
Q96ER9	CCDC51	√
Q9BXK5	BCL2L13	√
O60716	CTNND1	√
Q6FI81	CIAPIN1	√
Q8N183	NDUFAF2	√
O43809	NUDT21	√
P29218	IMPA1	√
P68402	PAFAH1B2	√
Q9UGI8	TES	√
P46109	CRKL	√
P19784	CSNK2A2	√
P63279	UBE2I	√
Q9UN37	VPS4A	√
Q9H8Y8	GORASP2	√
Q9Y2J2	EPB41L3	√
Q01085	TIAL1	√
Q9H7E9	C8orf33	√
P24539	ATP5PB	√
Q9Y3A5	SBDS	√
O76031	CLPX	√
P07099	EPHX1	√
Q13492	PICALM	√
P11717	IGF2R	√
Q96PU8	QKI	√
Q9BRT2	UQCC2	√
Q9HC38	GLOD4	√
Q96EY7	PTCD3	√
P38606	ATP6V1A	√
Q16763	UBE2S	√
Q15006	EMC2	√
Q9Y2B0	CNPY2	√
P43304	GPD2	√
Q00059	TFAM	√
Q16181	SEPTIN7	√
Q15428	SF3A2	√
P60983	GMFB	√
O14828	SCAMP3	√
P25788	PSMA3	√
Q14011	CIRBP	√
Q16822	PCK2	√
P35244	RPA3	√
O15212	PFDN6	√
P51398	DAP3	√
P28072	PSMB6	√
Q9Y224	RTRAF	√
Q9Y3Y2	CHTOP	√
P15121	AKR1B1	√
P61163	ACTR1A	√
Q9UBQ5	EIF3K	√
P04179	SOD2	√
P61758	VBP1	√
Q9NUJ1	ABHD10	√
E9PAV3	NACA	√
Q13151	HNRNPA0	√
Q9Y281	CFL2	√
P47985	UQCRFS1	√
O00303	EIF3F	√
Q9Y5L4	TIMM13	√
Q16718	NDUFA5	√
O43169	CYB5B	√
P62333	PSMC6	√
P23434	GCSH	√
Q9H3N1	TMX1	√
P60953	CDC42	√
Q15056	EIF4H	√
P53999	SUB1	√
P51571	SSR4	√
Q7Z6Z7	HUWE1	√
P50570	DNM2	√
O75153	CLUH	√
Q92922	SMARCC1	√
Q8IX12	CCAR1	√
Q9Y263	PLAA	√
Q8NBF2	NHLRC2	√
Q9UNH7	SNX6	√
Q969G3	SMARCE1	√
Q13895	BYSL	√
Q9Y5X3	SNX5	√
Q02218	OGDH	√
O15160	POLR1C	√
Q14677	CLINT1	√
Q8WYA6	CTNNBL1	√
Q96C86	DCPS	√
P35221	CTNNA1	√
Q15046	KARS1	√
P42765	ACAA2	√
Q9NW13	RBM28	√
Q14318	FKBP8	√
Q13616	CUL1	√
Q14847	LASP1	√
P46379	BAG6	√
P63151	PPP2R2A	√
P20290	BTF3	√
Q96DI7	SNRNP40	√
Q15269	PWP2	√
Q8TEX9	IPO4	√
Q9UNF1	MAGED2	√
Q9BTD8	RBM42	√
P52758	RIDA	√
O94979	SEC31A	√
Q9NUQ9	CYRIB	√
Q9GZL7	WDR12	√
P49821	NDUFV1	√
P19404	NDUFV2	√
Q16795	NDUFA9	√
Q8TBC4	UBA3	√
P06280	GLA	√
P17174	GOT1	√
Q9UK76	JPT1	√
Q14320	FAM50A	√
O60220	TIMM8A	√
Q9UKK9	NUDT5	√
P12532	CKMT1A	√
Q9HDC9	APMAP	√
Q15631	TSN	√
Q14444	CAPRIN1	√
Q9H773	DCTPP1	√
O75439	PMPCB	√
Q9NVA2	SEPTIN11	√
P62266	RPS23	√
P09012	SNRPA	√
P21964	COMT	√
P0DPI2	GATD3	√
Q9BX68	HINT2	√
O75347	TBCA	√
P04792	HSPB1	√
P28070	PSMB4	√
Q15758	SLC1A5	√
O95757	HSPA4L	√
P35658	NUP214	√
Q8WUM0	NUP133	√
Q7Z5L9	IRF2BP2	√
Q13685	AAMP	√
Q13451	FKBP5	√
P30419	NMT1	√
P80303	NUCB2	√
Q14126	DSG2	√
Q13867	BLMH	√
Q9Y3B7	MRPL11	√
Q9BUJ2	HNRNPUL1	√
Q9UNE7	STUB1	√
Q96AY3	FKBP10	√
Q9NTZ6	RBM12	√
O15067	PFAS	√
Q9HCC0	MCCC2	√
Q9BT78	COPS4	√
O43684	BUB3	√
O43583	DENR	√
P56192	MARS1	√
P50454	SERPINH1	√
Q9H4A4	RNPEP	√
O75489	NDUFS3	√
P50995	ANXA11	√
P22307	SCP2	√
Q9BQA1	WDR77	√
Q9NR45	NANS	√
Q9BWD1	ACAT2	√
Q9Y6C9	MTCH2	√
Q00796	SORD	√
P49257	LMAN1	√
Q99471	PFDN5	√
Q10567	AP1B1	√
Q9NTK5	OLA1	√
P67870	CSNK2B	√
P61081	UBE2M	√
Q13283	G3BP1	√
Q9UBQ7	GRHPR	√
Q13011	ECH1	√
P30048	PRDX3	√
Q99436	PSMB7	√
P25789	PSMA4	√
P62888	RPL30	√
Q15417	CNN3	√
Q29RF7	PDS5A	√
Q9UHD1	CHORDC1	√
Q09666	AHNAK	√
Q92667	AKAP1	√
P61011	SRP54	√
Q96J01	THOC3	√
O60763	USO1	√
P23193	TCEA1	√
Q96A49	SYAP1	√
P36776	LONP1	√
O43615	TIMM44	√
Q99986	VRK1	√
P41250	GARS1	√
P30520	ADSS2	√
O43776	NARS1	√
Q9HB71	CACYBP	√
P16949	STMN1	√
Q9UHX1	PUF60	√
Q04837	SSBP1	√
P06744	GPI	√
P0DP25	CALM3	√
P32119	PRDX2	√
P20020	ATP2B1	√
Q13423	NNT	√
P14735	IDE	√
Q9BSJ8	ESYT1	√
P45974	USP5	√
P07197	NEFM	√
P25786	PSMA1	√
Q6P2E9	EDC4	√
O43852	CALU	√
P12081	HARS1	√
Q8N163	CCAR2	√
Q7L2H7	EIF3M	√
Q99536	VAT1	√
P68400	CSNK2A1	√
Q01518	CAP1	√
Q16543	CDC37	√
P29373	CRABP2	√
Q8NBS9	TXNDC5	√
Q9BTT0	ANP32E	√
P61604	HSPE1	√
P31930	UQCRC1	√
Q92900	UPF1	√
O60664	PLIN3	√
Q2TAY7	SMU1	√
Q13148	TARDBP	√
P43490	NAMPT	√
O15372	EIF3H	√
O60749	SNX2	√
P07741	APRT	√
P62906	RPL10A	√
P38117	ETFB	√
P28066	PSMA5	√
P07355	ANXA2	√
Q7KZ85	SUPT6H	√
Q14008	CKAP5	√
O60271	SPAG9	√
Q06210	GFPT1	√
P02545	LMNA	√
Q99873	PRMT1	√
Q15691	MAPRE1	√
Q15907	RAB11B	√
P10768	ESD	√
Q15155	NOMO1	√
P62195	PSMC5	√
Q9BZZ5	API5	√
P30153	PPP2R1A	√
P08559	PDHA1	√
P80723	BASP1	√
Q15181	PPA1	√
P68104	EEF1A1	√
P17980	PSMC3	√
P35998	PSMC2	√
P55884	EIF3B	√
Q08J23	NSUN2	√
P49915	GMPS	√
P05455	SSB	√
Q99798	ACO2	√
P40926	MDH2	√
Q13200	PSMD2	√
P50991	CCT4	√
Q14697	GANAB	√
Q02790	FKBP4	√
Q9UEY8	ADD3		√
Q8WUA4	GTF3C2		√
Q5T653	MRPL2		√
Q9Y646	CPQ		√
Q8NEW0	SLC30A7		√
Q9UI30	TRMT112		√
P82663	MRPS25		√
Q9ULX3	NOB1		√
Q71RC2	LARP4		√
Q9BZ95	NSD3		√
Q9H8S9	MOB1A		√
Q8NF91	SYNE1		√
P25440	BRD2		√
P49642	PRIM1		√
Q9UBB9	TFIP11		√
Q5VTL8	PRPF38B		√
Q8NI60	COQ8A		√
Q9NS86	LANCL2		√
O00264	PGRMC1		√
O15260	SURF4		√
O15173	PGRMC2		√
O43929	ORC4		√
Q9NSD9	FARSB		√
Q13547	HDAC1		√
P09001	MRPL3		√
P55039	DRG2		√
P40222	TXLNA		√
P0DKX0	ZNF728		√
P47914	RPL29		√
P13693	TPT1		√
Q86WX3	RPS19BP1		√
Q562R1	ACTBL2		√
Q99880	H2BC13		√
Q9BVA1	TUBB2B		√
Q15654	TRIP6		√
Q96BK5	PINX1		√
O94927	HAUS5		√
Q9P013	CWC15		√
O00291	HIP1		√
Q08378	GOLGA3		√
Q9ULH0	KIDINS220		√
Q04724	TLE1		√
P57737	CORO7		√
Q9Y2X9	ZNF281		√
Q13526	PIN1		√
A0AVT1	UBA6		√
Q96GM5	SMARCD1		√
P98194	ATP2C1		√
Q96KB5	PBK		√
Q9Y312	AAR2		√
Q9NQW6	ANLN		√
P69849	NOMO3		√
P53384	NUBP1		√
Q9UJA5	TRMT6		√
Q5W0B1	OBI1		√
O14578	CIT		√
Q8N999	RLIG1		√
Q9HAU0	PLEKHA5		√
P61160	ACTR2		√
Q92643	PIGK		√
Q9UHR5	SAP30BP		√
O60488	ACSL4		√
P29144	TPP2		√
Q13395	TARBP1		√
O60524	NEMF		√
P25685	DNAJB1		√
Q86Y07	VRK2		√
P00450	CP		√
P52594	AGFG1		√
Q13769	THOC5		√
Q9Y2L5	TRAPPC8		√
Q9BYB4	GNB1L		√
Q96P11	NSUN5		√
Q7Z5K2	WAPL		√
Q9Y3C1	NOP16		√
Q9H089	LSG1		√
O15127	SCAMP2		√
Q6P2H3	CEP85		√
O94822	LTN1		√
Q9UJX3	ANAPC7		√
O95248	SBF1		√
P50748	KNTC1		√
P48507	GCLM		√
Q05682	CALD1		√
O94832	MYO1D		√
Q53S33	BOLA3		√
Q63HN8	RNF213		√
O75150	RNF40		√
O95714	HERC2		√
Q7Z3J2	VPS35L		√
O14579	COPE		√
Q7Z2T5	TRMT1L		√
Q9Y2K7	KDM2A		√
O15126	SCAMP1		√
Q96RR1	TWNK		√
Q96A65	EXOC4		√
Q86YQ8	CPNE8		√
Q32P41	TRMT5		√
Q14674	ESPL1		√
Q15070	OXA1L		√
Q6P9B9	INTS5		√
Q9NPF4	OSGEP		√
P52888	THOP1		√
O43826	SLC37A4		√
Q9Y4I1	MYO5A		√
Q9HC52	CBX8		√
Q5TC12	ATPAF1		√
O75122	CLASP2		√
Q86TB9	PATL1		√
Q9NQP4	PFDN4		√
Q9BT22	ALG1		√
Q9C0C2	TNKS1BP1		√
Q6P1M0	SLC27A4		√
P28340	POLD1		√
Q8TB61	SLC35B2		√
Q8NFC6	BOD1L1		√
Q9ULT8	HECTD1		√
Q02413	DSG1		√
Q1ED39	KNOP1		√
Q99829	CPNE1		√
Q7Z739	YTHDF3		√
Q01581	HMGCS1		√
Q6IAN0	DHRS7B		√
Q14738	PPP2R5D		√
Q9H2H8	PPIL3		√
Q86XI2	NCAPG2		√
Q9Y2W2	WBP11		√
Q86Y39	NDUFA11		√
Q9UQ88	CDK11A		√
Q96SU4	OSBPL9		√
P17858	PFKL		√
Q04323	UBXN1		√
O75027	ABCB7		√
Q8NEV1	CSNK2A3		√
Q9BRL6	SRSF8		√
Q7Z4V5	HDGFL2		√
Q9Y324	FCF1		√
Q13505	MTX1		√
Q92890	UFD1		√
Q15382	RHEB		√
Q7L4I2	RSRC2		√
Q76FK4	NOL8		√
Q9NPF5	DMAP1		√
O15027	SEC16A		√
Q14409	GK3		√
Q6NXE6	ARMC6		√
Q8IUF8	RIOX2		√
P40763	STAT3		√
Q96E11	MRRF		√
Q9NX24	NHP2		√
P78345	RPP38		√
O95340	PAPSS2		√
Q5VW36	FOCAD		√
Q7KZI7	MARK2		√
O60231	DHX16		√
Q9H3Z4	DNAJC5		√
Q9NVV0	TMEM38B		√
Q6PK04	CCDC137		√
Q9H9Y2	RPF1		√
O75530	EED		√
Q8NCW5	NAXE		√
Q9Y5Q9	GTF3C3		√
Q15477	SKIC2		√
P62310	LSM3		√
Q9HBH5	RDH14		√
Q7Z434	MAVS		√
Q99496	RNF2		√
P00441	SOD1		√
Q8N1G2	CMTR1		√
O43818	RRP9		√
Q9NQG5	RPRD1B		√
P12955	PEPD		√
Q9NVH2	INTS7		√
Q92665	MRPS31		√
Q9Y6M9	NDUFB9		√
Q9BYC8	MRPL32		√
P60520	GABARAPL2		√
Q9GZR2	REXO4		√
Q8IXK0	PHC2		√
P62314	SNRPD1		√
Q15836	VAMP3		√
Q9H857	NT5DC2		√
Q8IX01	SUGP2		√
Q96RQ3	MCCC1		√
Q9BY32	ITPA		√
Q71DI3	H3C13		√
P08134	RHOC		√
Q8WVX9	FAR1		√
Q9Y3U8	RPL36		√
P62244	RPS15A		√
P29372	MPG		√
Q08170	SRSF4		√
Q9NYY8	FASTKD2		√
Q8NCA5	FAM98A		√
Q8NF37	LPCAT1		√
Q9Y5K5	UCHL5		√
P46778	RPL21		√
P11802	CDK4		√
Q9UBF2	COPG2		√
O95819	MAP4K4		√
Q6P1L8	MRPL14		√
Q8IWA0	WDR75		√
Q53H96	PYCR3		√
Q9H7B2	RPF2		√
Q14527	HLTF		√
P84103	SRSF3		√
Q15287	RNPS1		√
Q9NZ01	TECR		√
P16403	H1-2		√
P26583	HMGB2		√
Q13765	NACA		√
Q5C9Z4	NOM1		√
O15047	SETD1A		√
P55011	SLC12A2		√
Q86UK7	ZNF598		√
P62995	TRA2B		√
Q6UXN9	WDR82		√
Q13724	MOGS		√
O60333	KIF1B		√
Q9UPN4	CEP131		√
O14497	ARID1A		√
P42224	STAT1		√
Q15398	DLGAP5		√
Q8N3C0	ASCC3		√
Q6PJG6	BRAT1		√
Q9NZJ4	SACS		√
Q92614	MYO18A		√
Q9UL54	TAOK2		√
Q7L7X3	TAOK1		√
Q9H0H0	INTS2		√
O43847	NRDC		√
Q7Z4H3	HDDC2		√
Q9NZM5	NOP53		√
Q9UBQ0	VPS29		√
Q14573	ITPR3		√
Q8IYB8	SUPV3L1		√
Q5JSL3	DOCK11		√
Q66K74	MAP1S		√
Q9UK61	TASOR		√
P0DPB6	POLR1D		√
O60885	BRD4		√
Q8N3U4	STAG2		√
Q8N5C6	SRBD1		√
P17252	PRKCA		√
O60563	CCNT1		√
Q96KG9	SCYL1		√
Q9NR12	PDLIM7		√
Q96DV4	MRPL38		√
O75521	ECI2		√
P51956	NEK3		√
P49815	TSC2		√
Q96T23	RSF1		√
P55196	AFDN		√
P03915	MT-ND5		√
Q96DT7	ZBTB10		√
A1X283	SH3PXD2B		√
O15446	POLR1G		√
O96028	NSD2		√
Q8WWK9	CKAP2		√
Q7L8L6	FASTKD5		√
Q06787	FMR1		√
Q9Y2T2	AP3M1		√
Q9UQR0	SCML2		√
P82970	HMGN5		√
Q9Y697	NFS1		√
Q8TCT9	HM13		√
Q01968	OCRL		√
Q96SK2	TMEM209		√
Q9Y570	PPME1		√
Q15361	TTF1		√
O00425	IGF2BP3		√
P35241	RDX		√
Q96A35	MRPL24		√
Q8TAQ2	SMARCC2		√
O00566	MPHOSPH10		√
Q12893	TMEM115		√
Q99805	TM9SF2		√
P82912	MRPS11		√
Q9UNQ2	DIMT1		√
Q9HC07	TMEM165		√
Q01831	XPC		√
Q96A72	MAGOHB		√
Q9Y2P8	RCL1		√
P42285	MTREX		√
Q9NXE4	SMPD4		√
O00203	AP3B1		√
Q12768	WASHC5		√
Q13206	DDX10		√
Q9BXS5	AP1M1		√
Q5T9A4	ATAD3B		√
Q13330	MTA1		√
Q9NVN8	GNL3L		√
Q99570	PIK3R4		√
Q15645	TRIP13		√
Q9Y3A4	RRP7A		√
Q9BU76	MMTAG2		√
P51148	RAB5C		√
P09622	DLD		√
Q15185	PTGES3		√
Q96EY1	DNAJA3		√
Q49A26	GLYR1		√
O43747	AP1G1		√
O75940	SMNDC1		√
Q96QU8	XPO6		√
P51572	BCAP31		√
P83881	RPL36A		√
P54132	BLM		√
Q14781	CBX2		√
Q14997	PSME4		√
Q8IXT5	RBM12B		√
Q13136	PPFIA1		√
Q9UBD5	ORC3		√
O95140	MFN2		√
P21359	NF1		√
Q8N5F7	NKAP		√
Q03164	KMT2A		√
Q13557	CAMK2D		√
P42356	PI4KA		√
Q9H5V9	STEEP1		√
Q12872	SFSWAP		√
O14974	PPP1R12A		√
Q9NUQ7	UFSP2		√
Q9NWT1	PAK1IP1		√
P09884	POLA1		√
Q8N122	RPTOR		√
A0FGR8	ESYT2		√
Q8WXI9	GATAD2B		√
Q99549	MPHOSPH8		√
Q8N201	INTS1		√
O60306	AQR		√
Q9BSJ2	TUBGCP2		√
O75165	DNAJC13		√
Q6Y7W6	GIGYF2		√
Q8NFW8	CMAS		√
Q05655	PRKCD		√
O43159	RRP8		√
Q6YN16	HSDL2		√
Q07864	POLE		√
Q86VM9	ZC3H18		√
Q9Y285	FARSA		√
Q92734	TFG		√
Q13642	FHL1		√
Q9NZB2	FAM120A		√
P08243	ASNS		√
P47756	CAPZB		√
Q9NUU7	DDX19A		√
P82933	MRPS9		√
Q9H078	CLPB		√
O95793	STAU1		√
O94854	MACF1		√
Q8IWX8	CHERP		√
O75116	ROCK2		√
Q9UHD8	SEPTIN9		√
O75616	ERAL1		√
Q9NNW5	WDR6		√
Q96CW1	AP2M1		√
Q9UI26	IPO11		√
P30084	ECHS1		√
Q13523	PRP4K		√
Q8NAV1	PRPF38A		√
Q9H2U1	DHX36		√
Q99729	HNRNPAB		√
Q68CQ4	UTP25		√
P46821	MAP1B		√
P30260	CDC27		√
O60318	MCM3AP		√
Q15022	SUZ12		√
Q9BZF1	OSBPL8		√
Q8ND82	ZNF280C		√
Q5SW79	CEP170		√
Q9NYV4	CDK12		√
Q99700	ATXN2		√
O94913	PCF11		√
Q9BW27	NUP85		√
Q969X6	UTP4		√
P28074	PSMB5		√
Q8N684	CPSF7		√
Q7L576	CYFIP1		√
P62495	ETF1		√
Q9UI10	EIF2B4		√
Q6PJT7	ZC3H14		√
Q02241	KIF23		√
Q15386	UBE3C		√
Q9ULW0	TPX2		√
Q9Y2U8	LEMD3		√
Q96Q15	SMG1		√
O75475	PSIP1		√
P49454	CENPF		√
Q6ZNB6	NFXL1		√
Q9BWH6	RPAP1		√
Q9BY44	EIF2A		√
Q9HC35	EML4		√
P42695	NCAPD3		√
Q14562	DHX8		√
Q7Z417	NUFIP2		√
Q9ULK4	MED23		√
Q9UIA9	XPO7		√
Q9NVI7	ATAD3A		√
P28288	ABCD3		√
Q9Y3I0	RTCB		√
Q15050	RRS1		√
O95232	LUC7L3		√
O43707	ACTN4		√
Q9Y2A7	NCKAP1		√
Q9NQ55	PPAN		√
Q9H8H2	DDX31		√
P19367	HK1		√
Q16637	SMN1		√
Q6NSI4	RADX		√
Q8NI27	THOC2		√
Q9UHI6	DDX20		√
Q8TED0	UTP15		√
Q13535	ATR		√
O75717	WDHD1		√
P51608	MECP2		√
Q99590	SCAF11		√
Q9BTC0	DIDO1		√
Q86UE4	MTDH		√
O00159	MYO1C		√
O95478	NSA2		√
Q5VTE0	EEF1A1P5		√
Q8IWS0	PHF6		√
Q8IY37	DHX37		√
Q96I24	FUBP3		√
Q9NR09	BIRC6		√
P38432	COIL		√
P08133	ANXA6		√
Q96ME7	ZNF512		√
Q96I25	RBM17		√
Q5T3I0	GPATCH4		√
Q8WWQ0	PHIP		√
Q99460	PSMD1		√
P14314	PRKCSH		√
Q14202	ZMYM3		√
Q8NCM8	DYNC2H1		√
Q92620	DHX38		√
Q9UPU5	USP24		√
Q92576	PHF3		√
Q9NY93	DDX56		√
Q12769	NUP160		√
Q7Z478	DHX29		√
Q9BTW9	TBCD		√
O00267	SUPT5H		√
Q9Y4P3	TBL2		√
Q9P275	USP36		√
Q9NWH9	SLTM		√
Q2NL82	TSR1		√
Q9Y5J1	UTP18		√
Q96T37	RBM15		√
Q9H2P0	ADNP		√
Q9NTI5	PDS5B		√
Q6P158	DHX57		√
O75592	MYCBP2		√
O94776	MTA2		√
P11940	PABPC1		√
Q5SRE5	NUP188		√
P51991	HNRNPA3		√
Q03252	LMNB2		√
P49756	RBM25		√
Q14739	LBR		√
Q8WWM7	ATXN2L		√
P49790	NUP153		√
P51532	SMARCA4		√
Q9P0M6	MACROH2A2		√
Q9H0D6	XRN2		√
P49711	CTCF		√
P42858	HTT		√
Q5VZL5	ZMYM4		√
Q9Y4W2	LAS1L		√
Q7Z406	MYH14		√
Q5SSJ5	HP1BP3		√
P57678	GEMIN4		√
P18754	RCC1		√
P18206	VCL		√
Q9H2G2	SLK		√
P78316	NOP14		√
Q14151	SAFB2		√
Q5VYK3	ECPAS		√
O15213	WDR46		√
O95782	AP2A1		√
Q13823	GNL2		√
P38159	RBMX		√
O00411	POLRMT		√
[truncated: 49 more rows]

## Sheet: Table S7b
Table S7b. Identified RBPs from risdiplam-treated HEK293T cells
Uniprot accession	Gene Symbol	-Log(BH-ajusted P-value）	Log2(Difference)	Unique peptides	Log2(Intensity.L.S1)	Log2(Intensity.L.S2)	Log2(Intensity.L.S3)	Log2(Intensity.H.S1)	Log2(Intensity.H.S2)	Log2(Intensity.H.S3)
Q9NWU5	MRPL22	5.25427	1.13651	2	22.3879	22.3879	22.4211	21.2289	21.2289	21.3295
Q03001	DST	2.28715	1.17139	2	25.442	25.4405	25.8271	24.37	24.7016	24.1238
Q9UL46	PSME2	4.03572	1.83098	2	26.7475	26.8345	27.0847	25.0023	25.0023	25.1692
Q15363	TMED2	2.76973	2.93985	2	22.6911	22.3387	21.3919	19.1407	19.3207	19.1407
P62942	FKBP1A	5.85322	3.06169	2	27.378	27.2804	27.2482	24.3235	24.2612	24.1367
O43447	PPIH	4.14295	3.61567	2	25.4515	25.4138	25.6311	21.8713	21.5372	22.2409
P50552	VASP	3.16065	3.69263	2	19.7004	19.7004	20.869	16.3973	16.3973	16.3973
P58546	MTPN	3.85921	3.75321	2	26.6206	26.5636	26.1417	22.4745	23.1174	22.4745
P53621	COPA	2.08382	3.89263	2	19.49	21.89	19.49	16.3973	16.3973	16.3973
P40616	ARL1	2.42861	4.30413	2	22.1203	19.992	19.992	16.3973	16.3973	16.3973
Q9BW92	TARS2	5.33804	4.39697	2	20.664	20.664	21.0548	16.3973	16.3973	16.3973
Q7RTV0	PHF5A	2.77129	4.43467	2	20.2181	22.0147	20.2632	16.3973	16.3973	16.3973
O43896	KIF1C	3.67099	4.45867	2	20.5082	21.5515	20.5082	16.3973	16.3973	16.3973
P48634	PRRC2A	2.04383	4.4595	2	21.2149	21.2149	22.6001	16.3973	16.3973	18.8568
Q92575	UBXN4	5.47101	4.52092	2	20.847	21.1596	20.7481	16.3973	16.3973	16.3973
O60762	DPM1	2.71775	4.53561	2	20.3079	20.3079	22.1831	16.3973	16.3973	16.3973
Q96ST3	SIN3A	4.18261	4.56094	2	20.6945	20.6945	21.4859	16.3973	16.3973	16.3973
Q9NWQ8	PAG1	4.82278	4.56466	2	20.6499	21.2807	20.9554	16.3973	16.3973	16.3973
Q8NI36	WDR36	2.53222	4.62306	2	22.3583	19.9177	20.7852	16.3973	16.3973	16.3973
Q8WTS6	SETD7	2.66299	4.63663	2	21.4993	21.8726	19.73	16.3973	16.3973	16.3973
P63098	PPP3R1	2.4902	4.68177	2	20.3366	20.3366	22.5641	16.3973	16.3973	16.3973
Q9BV79	MECR	6.07654	4.6893	2	20.9227	21.2359	21.1013	16.3973	16.3973	16.3973
Q13277	STX3	6.41497	4.72824	2	21.0535	21.2761	21.0471	16.3973	16.3973	16.3973
P53992	SEC24C	13.0719	4.76178	2	21.1575	21.1624	21.1575	16.3973	16.3973	16.3973
O43617	TRAPPC3	12.4355	4.79593	2	21.1909	21.1909	21.198	16.3973	16.3973	16.3973
Q8N8A6	DDX51	3.08484	4.94709	2	20.553	22.3918	21.0884	16.3973	16.3973	16.3973
Q14315	FLNC	6.26443	4.9481	2	21.2345	21.2873	21.5145	16.3973	16.3973	16.3973
P25490	YY1	5.9358	4.95209	2	21.2455	21.2455	21.5572	16.3973	16.3973	16.3973
O15344	MID1	5.04701	4.97149	2	21.1946	21.7172	21.1946	16.3973	16.3973	16.3973
O94808	GFPT2	3.5535	5.00707	2	22.2413	20.9859	20.9859	16.3973	16.3973	16.3973
O96000	NDUFB10	2.15623	5.01011	2	20.4252	23.3719	20.4252	16.3973	16.3973	16.3973
O95785	WIZ	4.00747	5.02816	2	22.0696	21.1034	21.1034	16.3973	16.3973	16.3973
Q9BW83	IFT27	2.54379	5.06993	2	20.6895	23.0227	20.6895	16.3973	16.3973	16.3973
Q06124	PTPN11	5.39022	5.07167	2	21.7605	21.3232	21.3232	16.3973	16.3973	16.3973
Q9BRT3	MIEN1	8.45107	5.09351	2	21.4657	21.541	21.4657	16.3973	16.3973	16.3973
Q9Y2R4	DDX52	3.76829	5.09931	2	22.0466	21.6649	20.7784	16.3973	16.3973	16.3973
Q13868	EXOSC2	5.30419	5.10891	2	21.6914	21.6275	21.1998	16.3973	16.3973	16.3973
O60610	DIAPH1	4.58557	5.1178	2	21.2809	21.9836	21.2809	16.3973	16.3973	16.3973
O95295	SNAPIN	6.07362	5.16047	2	21.4578	21.7578	21.4578	16.3973	16.3973	16.3973
Q9BRX5	GINS3	4.68704	5.18889	2	21.5281	21.2307	21.9999	16.3973	16.3973	16.3973
Q8NBJ7	SUMF2	8.26222	5.22511	2	21.5937	21.5937	21.6799	16.3973	16.3973	16.3973
P61020	RAB5B	5.0879	5.2793	2	21.496	22.038	21.496	16.3973	16.3973	16.3973
O95251	KAT7	3.25584	5.32077	2	21.6946	20.8115	22.6481	16.3973	16.3973	16.3973
Q9Y314	NOSIP	3.67458	5.3249	2	21.4006	22.5446	21.2215	16.3973	16.3973	16.3973
P16930	FAH	2.83522	5.33385	2	23.0998	21.0469	21.0469	16.3973	16.3973	16.3973
P48449	LSS	8.08515	5.33848	2	21.7033	21.8008	21.7033	16.3973	16.3973	16.3973
O43920	NDUFS5	2.82781	5.34501	2	23.1169	21.1345	20.9755	16.3973	16.3973	16.3973
P67812	SEC11A	5.73185	5.34943	2	21.6205	21.6205	21.9992	16.3973	16.3973	16.3973
Q9NRZ9	HELLS	4.0243	5.35198	2	21.1571	22.3329	21.7579	16.3973	16.3973	16.3973
Q16513	PKN2	3.50592	5.35956	2	21.4517	22.6623	21.1567	16.3973	16.3973	16.3973
Q9UHY1	NRBP1	2.86916	5.36151	2	21.085	23.1065	21.085	16.3973	16.3973	16.3973
Q9NQR4	NIT2	3.77006	5.38821	2	22.5786	21.389	21.389	16.3973	16.3973	16.3973
Q99611	SEPHS2	5.25931	5.39087	2	21.6211	22.1224	21.6211	16.3973	16.3973	16.3973
O14908	GIPC1	7.4059	5.39403	2	21.7428	21.7428	21.8884	16.3973	16.3973	16.3973
Q5QJE6	DNTTIP2	7.14066	5.39413	2	21.7349	21.9045	21.7349	16.3973	16.3973	16.3973
Q7L5D6	GET4	4.70729	5.39457	2	21.4759	22.2396	21.6602	16.3973	16.3973	16.3973
Q9H3G5	CPVL	5.85494	5.40443	2	22.0394	21.683	21.683	16.3973	16.3973	16.3973
Q9UG63	ABCF2	2.33939	5.40568	2	22.7307	19.9181	22.7602	16.3973	16.3973	16.3973
Q13618	CUL3	5.18756	5.40863	2	21.6312	21.6312	22.1554	16.3973	16.3973	16.3973
Q00535	CDK5	5.67862	5.4112	2	22.0106	21.5612	21.8537	16.3973	16.3973	16.3973
Q8TD19	NEK9	3.63815	5.43144	2	22.6917	21.3644	21.4302	16.3973	16.3973	16.3973
P54619	PRKAG1	3.6151	5.43396	2	21.3933	21.3933	22.7072	16.3973	16.3973	16.3973
P04637	TP53	2.67543	5.44183	2	23.3748	20.9788	21.1639	16.3973	16.3973	16.3973
P02794	FTH1	2.48691	5.45	2	20.9812	20.9812	23.5796	16.3973	16.3973	16.3973
Q9NYF8	BCLAF1	2.92777	5.46707	2	23.1908	21.2012	21.2012	16.3973	16.3973	16.3973
P07384	CAPN1	3.43672	5.48775	2	21.3937	21.3937	22.8678	16.3973	16.3973	16.3973
Q00403	GTF2B	4.66791	5.49217	2	21.6498	21.6498	22.3688	16.3973	16.3973	16.3973
Q9NQ88	TIGAR	6.18765	5.49322	2	21.7847	21.7972	22.0898	16.3973	16.3973	16.3973
Q9BUT1	BDH2	5.65343	5.49944	2	21.761	22.1683	21.761	16.3973	16.3973	16.3973
P32780	GTF2H1	2.85858	5.51868	2	21.1954	21.2407	23.3119	16.3973	16.3973	16.3973
Q8NE71	ABCF1	3.82099	5.52978	2	21.5321	22.7171	21.5321	16.3973	16.3973	16.3973
Q92896	GLG1	6.01346	5.54421	2	21.9581	21.7412	22.1254	16.3973	16.3973	16.3973
Q9BXW9	FANCD2	6.90361	5.55231	2	21.8829	21.8829	22.083	16.3973	16.3973	16.3973
Q96IZ0	PAWR	10.0002	5.57209	2	21.9582	21.9919	21.9582	16.3973	16.3973	16.3973
Q13948	CUX1	5.32142	5.5809	2	21.7228	22.292	21.9198	16.3973	16.3973	16.3973
P42696	RBM34	2.84771	5.5891	2	20.5682	22.5916	22.7995	16.3973	16.3973	16.3973
P16435	POR	3.63926	5.59168	2	21.5447	21.5447	22.8777	16.3973	16.3973	16.3973
Q9NVU7	SDAD1	3.19598	5.60042	2	21.4193	21.4193	23.1546	16.3973	16.3973	16.3973
Q93050	ATP6V0A1	9.60053	5.6047	2	21.9878	22.0305	21.9878	16.3973	16.3973	16.3973
Q8N7H5	PAF1	3.05052	5.61507	2	21.377	23.2777	21.3825	16.3973	16.3973	16.3973
Q15435	PPP1R7	5.2099	5.6273	2	22.3836	21.8451	21.8451	16.3973	16.3973	16.3973
P12235	SLC25A4	3.31157	5.634	2	21.4881	21.4881	23.1178	16.3973	16.3973	16.3973
Q9Y3C8	UFC1	2.80847	5.63424	2	23.5009	21.2969	21.2969	16.3973	16.3973	16.3973
Q9Y4X5	ARIH1	3.75108	5.64128	2	21.6188	21.6188	22.8782	16.3973	16.3973	16.3973
Q8TEA8	DTD1	3.84008	5.64481	2	22.8396	21.6434	21.6434	16.3973	16.3973	16.3973
Q96M27	PRRC1	6.02124	5.65745	2	22.2808	21.9418	21.9418	16.3973	16.3973	16.3973
Q9BR76	CORO1B	4.35568	5.67288	2	21.7735	21.7735	22.6636	16.3973	16.3973	16.3973
P62979	RPS27A	5.24182	5.67666	2	30.6838	30.8772	30.8481	25.4167	25.1249	24.8374
P09110	ACAA1	4.15378	5.68341	2	21.7464	22.7493	21.7464	16.3973	16.3973	16.3973
O00767	SCD	2.10302	5.69486	2	22.831	19.8259	23.6196	16.3973	16.3973	16.3973
Q9H0U6	MRPL18	4.34527	5.70826	2	21.8052	21.8052	22.7063	16.3973	16.3973	16.3973
Q02750	MAP2K1	3.37682	5.71127	2	21.6062	21.5518	23.1677	16.3973	16.3973	16.3973
Q14258	TRIM25	3.18309	5.71676	2	21.5191	21.5191	23.3041	16.3973	16.3973	16.3973
Q13268	DHRS2	6.73321	5.72559	2	22.2747	22.047	22.047	16.3973	16.3973	16.3973
Q9UKN8	GTF3C4	4.27542	5.73048	2	21.8138	22.7558	21.8138	16.3973	16.3973	16.3973
P46926	GNPDA1	4.46567	5.73863	2	22.4558	21.5746	22.3774	16.3973	16.3973	16.3973
P35573	AGL	6.0326	5.74298	2	22.0263	22.0263	22.3682	16.3973	16.3973	16.3973
Q00765	REEP5	4.30072	5.75196	2	21.8387	21.8387	22.7705	16.3973	16.3973	16.3973
Q00169	PITPNA	2.39333	5.75444	2	21.182	24.0912	21.182	16.3973	16.3973	16.3973
Q5VT66	MTARC1	4.17242	5.76653	2	21.8283	21.8283	22.8349	16.3973	16.3973	16.3973
Q7L2E3	DHX30	4.15799	5.77587	2	22.0337	21.6685	22.8173	16.3973	16.3973	16.3973
Q04206	RELA	5.66569	5.77706	2	22.0328	22.4577	22.0328	16.3973	16.3973	16.3973
Q7Z3B4	NUP54	4.30888	5.8055	2	21.8908	22.8268	21.8908	16.3973	16.3973	16.3973
Q96ST2	IWS1	6.1755	5.83071	2	22.4411	22.1215	22.1215	16.3973	16.3973	16.3973
Q9P032	NDUFAF4	3.85647	5.83604	2	21.4168	22.6465	22.6368	16.3973	16.3973	16.3973
Q8NFH5	NUP35	3.65699	5.87041	2	21.8061	21.8061	23.191	16.3973	16.3973	16.3973
Q02224	CENPE	3.93964	5.89436	2	21.8989	21.8989	23.0773	16.3973	16.3973	16.3973
Q15437	SEC23B	5.61043	5.89617	2	22.5887	22.1077	22.184	16.3973	16.3973	16.3973
P20810	CAST	3.66762	5.90116	2	21.8373	21.8373	23.2208	16.3973	16.3973	16.3973
P45954	ACADSB	9.30867	5.90901	2	22.2886	22.2886	22.3419	16.3973	16.3973	16.3973
P24928	POLR2A	3.65129	5.91668	2	21.8298	21.8648	23.2475	16.3973	16.3973	16.3973
Q96SB4	SRPK1	3.56872	5.92019	2	21.8271	23.2982	21.8271	16.3973	16.3973	16.3973
O15144	ARPC2	6.47239	5.92062	2	22.2268	22.2268	22.5003	16.3973	16.3973	16.3973
Q8N9T8	KRI1	3.1032	5.92319	2	23.5426	21.3431	22.0758	16.3973	16.3973	16.3973
Q9NRG9	AAAS	4.00182	5.92676	2	22.63	22.7753	21.5669	16.3973	16.3973	16.3973
Q53GQ0	HSD17B12	3.24817	5.93623	2	22.8475	23.0048	21.1483	16.3973	16.3973	16.3973
Q68E01	INTS3	3.24459	5.94181	2	22.3828	23.3492	21.2853	16.3973	16.3973	16.3973
Q92572	AP3S1	5.15342	5.94816	2	22.6167	22.455	21.9648	16.3973	16.3973	16.3973
Q01780	EXOSC10	4.06489	5.95327	2	22.99	22.3493	21.7125	16.3973	16.3973	16.3973
Q92747	ARPC1A	4.45592	5.96265	2	22.0658	22.0658	22.9484	16.3973	16.3973	16.3973
Q13126	MTAP	3.56356	5.98509	2	23.0077	22.7395	21.4001	16.3973	16.3973	16.3973
Q5J8M3	EMC4	5.0599	5.99075	2	22.798	22.2482	22.118	16.3973	16.3973	16.3973
O43819	SCO2	10.6404	6.00356	2	22.4177	22.3925	22.3925	16.3973	16.3973	16.3973
Q9BYD6	MRPL1	9.36583	6.00487	2	22.3847	22.3847	22.4371	16.3973	16.3973	16.3973
O75794	CDC123	3.53291	6.01561	2	21.904	21.904	23.4307	16.3973	16.3973	16.3973
Q4VC31	MIX23	3.07623	6.02022	2	21.8939	21.6151	23.7437	16.3973	16.3973	16.3973
Q9NXH9	TRMT1	6.36546	6.02606	2	22.2352	22.569	22.466	16.3973	16.3973	16.3973
P55145	MANF	2.60807	6.02656	2	21.13	24.1255	22.0161	16.3973	16.3973	16.3973
Q13501	SQSTM1	3.64804	6.03355	2	23.3848	21.9539	21.9539	16.3973	16.3973	16.3973
Q9H2P9	DPH5	3.57427	6.04063	2	22.4031	23.3187	21.5921	16.3973	16.3973	16.3973
P08047	SP1	5.30931	6.04187	2	22.791	22.344	22.1826	16.3973	16.3973	16.3973
Q69YN2	CWF19L1	3.81081	6.04463	2	22.0076	23.3106	22.0076	16.3973	16.3973	16.3973
Q9Y4W6	AFG3L2	4.30792	6.04704	2	22.9142	21.82	22.5989	16.3973	16.3973	16.3973
O43488	AKR7A2	4.16069	6.05428	2	23.1608	22.1102	22.0838	16.3973	16.3973	16.3973
P16989	YBX3	3.79287	6.05526	2	22.0539	21.9731	23.3307	16.3973	16.3973	16.3973
Q9H444	CHMP4B	5.00919	6.06924	2	22.0842	22.4786	22.8369	16.3973	16.3973	16.3973
Q8WVJ2	NUDCD2	4.80425	6.07059	2	22.2231	22.2231	22.9575	16.3973	16.3973	16.3973
Q71UI9	H2AZ2	2.607	6.09924	2	31.2573	30.5127	30.9631	26.5582	23.9624	23.9148
Q92522	H1-10	2.74603	6.10366	2	20.9006	22.9409	23.6614	16.3973	16.3973	16.3973
Q9UBS4	DNAJB11	6.31769	6.11026	2	22.4047	22.7133	22.4047	16.3973	16.3973	16.3973
O00422	SAP18	3.07797	6.11589	2	23.1961	21.1576	23.1859	16.3973	16.3973	16.3973
O75179	ANKRD17	17.8731	6.1426	2	22.5402	22.5398	22.5398	16.3973	16.3973	16.3973
Q9H974	QTRT2	13.7774	6.14264	2	22.5428	22.5386	22.5386	16.3973	16.3973	16.3973
Q8IV08	PLD3	7.31607	6.15779	2	22.4968	22.6718	22.4968	16.3973	16.3973	16.3973
P22033	MMUT	4.39939	6.16248	2	22.3342	23.1806	22.1647	16.3973	16.3973	16.3973
O75352	MPDU1	6.99378	6.17823	2	22.5738	22.4544	22.6985	16.3973	16.3973	16.3973
Q96KR1	ZFR	4.03574	6.18347	2	22.1912	22.1912	23.36	16.3973	16.3973	16.3973
Q9NX20	MRPL16	3.83065	6.19011	2	22.1478	23.4668	22.1478	16.3973	16.3973	16.3973
Q9BYD2	MRPL9	5.90313	6.19124	2	22.6377	22.3387	22.7893	16.3973	16.3973	16.3973
Q9BUL9	RPP25	4.71635	6.19333	2	22.3279	22.3279	23.1162	16.3973	16.3973	16.3973
Q13573	SNW1	4.25357	6.20485	2	22.5915	23.2039	22.0111	16.3973	16.3973	16.3973
P60510	PPP4C	4.8132	6.20658	2	22.1234	22.9573	22.731	16.3973	16.3973	16.3973
Q6NYC1	JMJD6	3.07469	6.20859	2	23.3896	23.1967	21.2315	16.3973	16.3973	16.3973
Q8NC96	NECAP1	6.62713	6.20952	2	22.5194	22.5194	22.7818	16.3973	16.3973	16.3973
P83916	CBX1	2.47979	6.21191	2	24.268	22.7212	20.8385	16.3973	16.3973	16.3973
Q5SY16	NOL9	5.21064	6.2128	2	23.0015	22.4676	22.3613	16.3973	16.3973	16.3973
Q15018	ABRAXAS2	4.23762	6.21281	2	21.9151	22.9247	22.9906	16.3973	16.3973	16.3973
P27361	MAPK3	8.10375	6.2232	2	22.5831	22.5831	22.6955	16.3973	16.3973	16.3973
Q9NSI2	SLX9	5.02654	6.23562	2	23.0752	22.4118	22.4118	16.3973	16.3973	16.3973
Q8N6T3	ARFGAP1	3.76799	6.23762	2	21.7161	23.0736	23.1151	16.3973	16.3973	16.3973
Q6P1J9	CDC73	4.91357	6.24018	2	23.1081	22.4377	22.3667	16.3973	16.3973	16.3973
P57088	TMEM33	3.05353	6.25231	2	22.2029	21.7181	24.0278	16.3973	16.3973	16.3973
O75683	SURF6	4.41617	6.25924	2	23.2887	22.3405	22.3405	16.3973	16.3973	16.3973
P51452	DUSP3	3.76209	6.25932	2	23.5822	22.1939	22.1939	16.3973	16.3973	16.3973
Q9Y2Z4	YARS2	2.21216	6.29286	2	23.6043	24.7165	22.9771	16.3973	19.6247	16.3973
P01116	KRAS	2.91918	6.29418	2	23.4723	23.4456	21.1566	16.3973	16.3973	16.3973
Q15404	RSU1	6.86279	6.29423	2	22.8464	22.6141	22.6141	16.3973	16.3973	16.3973
P62070	RRAS2	3.93082	6.30106	2	22.0833	23.5066	22.5052	16.3973	16.3973	16.3973
Q9BRT9	GINS4	5.03406	6.30428	2	22.8164	22.2717	23.0167	16.3973	16.3973	16.3973
Q9H2W6	MRPL46	8.73745	6.30612	2	22.7562	22.6771	22.6771	16.3973	16.3973	16.3973
Q92979	EMG1	5.22627	6.34272	2	23.1408	22.5396	22.5396	16.3973	16.3973	16.3973
Q9Y248	GINS2	4.4388	6.34615	2	23.3633	22.5427	22.3243	16.3973	16.3973	16.3973
Q96B36	AKT1S1	6.83142	6.3499	2	22.6677	22.9063	22.6677	16.3973	16.3973	16.3973
Q9NY27	PPP4R2	8.49524	6.36055	2	22.7273	22.7273	22.819	16.3973	16.3973	16.3973
O00442	RTCA	3.22709	6.36927	2	22.1208	24.0581	22.1208	16.3973	16.3973	16.3973
Q9NQ50	MRPL40	4.55631	6.37132	2	23.3619	22.472	22.472	16.3973	16.3973	16.3973
Q9C0B1	FTO	6.74807	6.37208	2	22.935	22.7083	22.6649	16.3973	16.3973	16.3973
Q16778	H2BC21	4.69116	6.38182	2	32.4746	32.6745	32.3984	26.3721	26.4195	25.6104
Q96DB5	RMDN1	3.56908	6.39973	2	23.857	22.2671	22.2671	16.3973	16.3973	16.3973
Q7Z3K3	POGZ	4.16053	6.4047	2	23.0326	22.0682	23.3052	16.3973	16.3973	16.3973
Q15007	WTAP	4.85111	6.41465	2	22.9388	23.1705	22.3266	16.3973	16.3973	16.3973
P08579	SNRPB2	5.70973	6.44477	2	23.1472	22.6524	22.7267	16.3973	16.3973	16.3973
Q9HAV4	XPO5	3.96239	6.46732	2	22.5328	22.3523	23.7088	16.3973	16.3973	16.3973
P35250	RFC2	2.93559	6.47469	2	23.5431	23.7594	21.3136	16.3973	16.3973	16.3973
Q16774	GUK1	4.12749	6.49231	2	22.5019	23.6651	22.5019	16.3973	16.3973	16.3973
Q13595	TRA2A	5.03287	6.51075	2	22.678	22.678	23.3681	16.3973	16.3973	16.3973
Q9NZL4	HSPBP1	4.71004	6.5335	2	22.9992	22.4184	23.3749	16.3973	16.3973	16.3973
O43708	GSTZ1	3.98277	6.53374	2	22.8048	23.7214	22.2669	16.3973	16.3973	16.3973
Q9BV86	NTMT1	3.60319	6.53924	2	22.4058	22.4058	23.9981	16.3973	16.3973	16.3973
Q99878	H2AC14	5.40157	6.55318	2	23.2651	22.6177	22.9687	16.3973	16.3973	16.3973
Q9NR50	EIF2B3	4.26013	6.55334	2	22.5883	23.6753	22.5883	16.3973	16.3973	16.3973
P13473	LAMP2	3.82841	6.55532	2	23.8674	22.6517	22.3389	16.3973	16.3973	16.3973
P00568	AK1	5.24294	6.55667	2	23.0101	23.278	22.5739	16.3973	16.3973	16.3973
O00330	PDHX	5.03017	6.57739	2	22.5133	23.1518	23.259	16.3973	16.3973	16.3973
P21926	CD9	2.92446	6.58974	2	21.4288	24.088	23.4444	16.3973	16.3973	16.3973
P61009	SPCS3	3.48064	6.60509	2	24.1549	22.4262	22.4262	16.3973	16.3973	16.3973
Q8TAE8	GADD45GIP1	6.84025	6.6112	2	22.9841	23.1618	22.8796	16.3973	16.3973	16.3973
Q07812	BAX	4.16885	6.61144	2	22.3623	23.6957	22.9683	16.3973	16.3973	16.3973
O60684	KPNA6	3.97413	6.61356	2	23.8036	22.9119	22.3172	16.3973	16.3973	16.3973
O15258	RER1	3.66215	6.6319	2	22.1651	23.9623	22.9603	16.3973	16.3973	16.3973
O60502	OGA	5.42105	6.63897	2	22.8488	22.8488	23.4112	16.3973	16.3973	16.3973
Q13033	STRN3	4.81064	6.64315	2	22.7736	23.5743	22.7736	16.3973	16.3973	16.3973
Q8WY22	BRI3BP	3.9055	6.6449	2	22.4868	22.7028	23.9371	16.3973	16.3973	16.3973
Q9NZ45	CISD1	2.81647	6.65763	2	24.7752	22.0542	22.3355	16.3973	16.3973	16.3973
P01889	HLA-B	3.74627	6.65793	2	22.2075	23.928	23.0302	16.3973	16.3973	16.3973
Q5RKV6	EXOSC6	4.80249	6.66424	2	22.7925	23.5996	22.7925	16.3973	16.3973	16.3973
Q96EY8	MMAB	4.04226	6.67604	2	22.8749	23.8777	22.4675	16.3973	16.3973	16.3973
P32929	CTH	5.9669	6.68652	2	22.946	23.3594	22.946	16.3973	16.3973	16.3973
P46977	STT3A	4.09129	6.73979	2	22.726	22.726	23.9593	16.3973	16.3973	16.3973
P35222	CTNNB1	4.16283	6.74646	2	22.4888	23.8529	23.0897	16.3973	16.3973	16.3973
Q9BWU0	SLC4A1AP	3.9548	6.77555	2	24.0106	22.481	23.027	16.3973	16.3973	16.3973
Q9BQ75	CMSS1	6.06544	6.81804	2	23.0826	23.4809	23.0826	16.3973	16.3973	16.3973
P06132	UROD	4.57898	6.82378	2	22.7476	23.1019	23.8138	16.3973	16.3973	16.3973
Q9H6Z4	RANBP3	4.24484	6.8623	2	24.0239	22.9167	22.8383	16.3973	16.3973	16.3973
Q9NPH2	ISYNA1	6.77191	6.86989	2	23.3712	23.3404	23.09	16.3973	16.3973	16.3973
O60888	CUTA	5.90698	6.86991	2	23.1207	23.5603	23.1207	16.3973	16.3973	16.3973
Q14558	PRPSAP1	2.83876	6.87564	2	23.1873	21.793	24.8386	16.3973	16.3973	16.3973
Q9Y3Z3	SAMHD1	4.49155	6.88418	2	22.9488	23.947	22.9488	16.3973	16.3973	16.3973
O60216	RAD21	6.8831	6.8909	2	23.2045	23.2045	23.4558	16.3973	16.3973	16.3973
P06493	CDK1	4.60571	6.91996	2	23.9265	23.1377	22.8876	16.3973	16.3973	16.3973
Q7Z4Q2	HEATR3	4.49719	6.92006	2	22.984	22.984	23.9842	16.3973	16.3973	16.3973
Q9UBV2	SEL1L	7.17335	6.92305	2	23.2792	23.2229	23.459	16.3973	16.3973	16.3973
Q09161	NCBP1	4.0685	6.92685	2	22.7524	23.0579	24.1622	16.3973	16.3973	16.3973
Q9BSH4	TACO1	4.72322	6.95063	2	23.0542	23.9354	23.0542	16.3973	16.3973	16.3973
P11908	PRPS2	9.76338	6.95293	2	23.3342	23.3342	23.3824	16.3973	16.3973	16.3973
Q92820	GGH	5.29975	7.04932	2	23.1478	23.332	23.8601	16.3973	16.3973	16.3973
Q12972	PPP1R8	3.61727	7.07124	2	23.6109	24.3756	22.4192	16.3973	16.3973	16.3973
P15586	GNS	4.89938	7.07519	2	23.2025	23.2025	24.0126	16.3973	16.3973	16.3973
P49207	RPL34	2.60736	7.08942	2	25.5779	22.4412	22.4412	16.3973	16.3973	16.3973
O95168	NDUFB4	4.31743	7.09071	2	23.1089	23.1089	24.2464	16.3973	16.3973	16.3973
P52788	SMS	6.06704	7.09814	2	23.7166	23.5282	23.2416	16.3973	16.3973	16.3973
P41223	BUD31	4.66561	7.16855	2	23.993	22.9554	23.7492	16.3973	16.3973	16.3973
Q9Y3C6	PPIL1	3.52839	7.17984	2	24.7952	22.9682	22.9682	16.3973	16.3973	16.3973
O00629	KPNA4	4.98516	7.18248	2	23.7146	23.9489	23.0759	16.3973	16.3973	16.3973
P23919	DTYMK	9.49723	7.20399	2	23.5819	23.5819	23.6402	16.3973	16.3973	16.3973
Q9UBX3	SLC25A10	3.59814	7.20711	2	23.6196	24.613	22.5807	16.3973	16.3973	16.3973
Q08257	CRYZ	4.27038	7.21978	2	22.9439	23.5898	24.3176	16.3973	16.3973	16.3973
Q9NX14	NDUFB11	3.99076	7.2383	2	22.916	23.4767	24.5142	16.3973	16.3973	16.3973
Q9NX40	OCIAD1	5.9994	7.2552	2	23.942	23.5497	23.4659	16.3973	16.3973	16.3973
Q9Y237	PIN4	2.71424	7.25782	2	24.8887	21.6698	24.4069	16.3973	16.3973	16.3973
P10155	RO60	6.81463	7.26161	2	23.8104	23.6731	23.4933	16.3973	16.3973	16.3973
O00560	SDCBP	4.07784	7.26318	2	23.6174	22.9096	24.4546	16.3973	16.3973	16.3973
P62877	RBX1	4.13577	7.27494	2	23.6044	24.4528	22.9595	16.3973	16.3973	16.3973
Q9H3K2	GHITM	3.77826	7.29565	2	23.1587	24.7616	23.1587	16.3973	16.3973	16.3973
P52926	HMGA2	4.82843	7.31079	2	23.1269	24.0127	23.9847	16.3973	16.3973	16.3973
O43598	DNPH1	5.37412	7.31809	2	24.14	23.5031	23.5031	16.3973	16.3973	16.3973
P62140	PPP1CB	3.55634	7.33044	2	22.593	23.8995	24.6908	16.3973	16.3973	16.3973
Q8IYB3	SRRM1	4.47055	7.34639	2	23.6493	24.4081	23.1737	16.3973	16.3973	16.3973
P48739	PITPNB	5.68869	7.35214	2	23.6711	23.4881	24.0892	16.3973	16.3973	16.3973
O95456	PSMG1	4.52227	7.35269	2	23.3494	23.4551	24.4456	16.3973	16.3973	16.3973
Q7Z7H8	MRPL10	3.79075	7.40729	2	23.9329	22.8143	24.6666	16.3973	16.3973	16.3973
Q14671	PUM1	8.78024	7.4283	2	23.8545	23.7651	23.8573	16.3973	16.3973	16.3973
P35249	RFC4	4.05153	7.48481	2	23.1648	24.7595	23.722	16.3973	16.3973	16.3973
Q9BZE1	MRPL37	4.98789	7.4933	2	23.7842	23.4824	24.4054	16.3973	16.3973	16.3973
O95881	TXNDC12	5.69899	7.55851	2	23.774	24.3194	23.774	16.3973	16.3973	16.3973
Q9Y333	LSM2	5.27573	7.56564	2	24.3606	23.9723	23.556	16.3973	16.3973	16.3973
Q00577	PURA	4.14827	7.59976	2	24.1272	23.1636	24.7005	16.3973	16.3973	16.3973
P56385	ATP5ME	2.21987	7.60244	2	25.3234	25.5344	21.1414	16.3973	16.3973	16.3973
P08237	PFKM	5.93976	7.61212	2	23.7053	24.2441	24.0789	16.3973	16.3973	16.3973
Q9Y221	NIP7	6.31015	7.62263	2	23.8911	23.8911	24.2778	16.3973	16.3973	16.3973
Q99720	SIGMAR1	4.89675	7.64235	2	24.3483	24.315	23.4558	16.3973	16.3973	16.3973
P20839	IMPDH1	6.11171	7.64696	2	23.7714	24.2656	24.0958	16.3973	16.3973	16.3973
Q8TC12	RDH11	5.72938	7.67543	2	23.8283	23.9628	24.4271	16.3973	16.3973	16.3973
O00483	NDUFA4	5.90304	7.70558	2	24.3564	24.1585	23.7938	16.3973	16.3973	16.3973
P18085	ARF4	2.97975	7.707	2	22.3108	24.7766	25.2255	16.3973	16.3973	16.3973
Q12904	AIMP1	6.38895	7.72385	2	23.9964	23.9964	24.3708	16.3973	16.3973	16.3973
Q9BYD3	MRPL4	3.93115	7.74075	2	23.8161	25.1526	23.4456	16.3973	16.3973	16.3973
O75348	ATP6V1G1	5.07051	7.76396	2	24.1787	24.6172	23.688	16.3973	16.3973	16.3973
O75915	ARL6IP5	4.00501	7.77559	2	24.943	23.2387	24.337	16.3973	16.3973	16.3973
O00193	SMAP	5.1106	7.7854	2	23.8398	24.0088	24.6995	16.3973	16.3973	16.3973
Q15427	SF3B4	7.41547	7.8	2	24.237	24.2933	24.0616	16.3973	16.3973	16.3973
Q9Y2R5	MRPS17	15.773	7.81488	2	24.2116	24.2116	24.2133	16.3973	16.3973	16.3973
O75380	NDUFS6	6.18486	7.82401	2	24.2398	23.9663	24.4579	16.3973	16.3973	16.3973
Q9HB40	SCPEP1	6.19508	7.90376	2	24.3756	24.025	24.5026	16.3973	16.3973	16.3973
P84085	ARF5	4.44101	7.9287	2	23.5503	24.8399	24.5879	16.3973	16.3973	16.3973
P59998	ARPC4	6.00179	7.93377	2	24.0165	24.5413	24.4355	16.3973	16.3973	16.3973
P30405	PPIF	5.19584	7.94895	2	23.9952	24.2001	24.8436	16.3973	16.3973	16.3973
P04632	CAPNS1	5.32557	8.0146	2	23.9719	24.4697	24.7942	16.3973	16.3973	16.3973
O60925	PFDN1	4.71122	8.02527	2	24.5385	23.7817	24.9476	16.3973	16.3973	16.3973
Q9NPJ3	ACOT13	4.80097	8.0345	2	24.2434	25.0641	23.988	16.3973	16.3973	16.3973
P61970	NUTF2	4.22535	8.0509	2	25.0812	24.696	23.5674	16.3973	16.3973	16.3973
O15479	MAGEB2	6.00261	8.06349	2	24.3108	24.7861	24.2855	16.3973	16.3973	16.3973
P62328	TMSB4X	13.8647	8.06913	2	24.4647	24.47	24.4647	16.3973	16.3973	16.3973
P61513	RPL37A	4.48032	8.07769	2	24.7375	24.9854	23.7022	16.3973	16.3973	16.3973
P61960	UFM1	4.43165	8.08188	2	24.1426	25.2845	24.0105	16.3973	16.3973	16.3973
Q5SRD1	TIMM23B	6.22246	8.10397	2	24.3547	24.7895	24.3596	16.3973	16.3973	16.3973
P62854	RPS26	3.12495	8.11154	2	23.6348	23.6348	26.257	16.3973	16.3973	16.3973
P00374	DHFR	4.76438	8.11887	2	25.152	24.0152	24.3813	16.3973	16.3973	16.3973
P18859	ATP5PF	5.20996	8.13886	2	24.143	24.4391	25.0264	16.3973	16.3973	16.3973
P47813	EIF1AX	7.69302	8.14068	2	24.4759	24.6622	24.4759	16.3973	16.3973	16.3973
Q15843	NEDD8	3.05895	8.14956	2	22.8141	25.9152	24.9114	16.3973	16.3973	16.3973
P00167	CYB5A	7.63214	8.20116	2	24.7269	24.5197	24.5488	16.3973	16.3973	16.3973
P21281	ATP6V1B2	5.7067	8.20811	2	24.6042	24.9465	24.2656	16.3973	16.3973	16.3973
P36543	ATP6V1E1	3.67375	8.20925	2	23.3288	25.2078	25.2831	16.3973	16.3973	16.3973
P61803	DAD1	5.56829	8.21368	2	24.262	24.9971	24.5739	16.3973	16.3973	16.3973
Q01081	U2AF1	5.73733	8.21399	2	24.4679	24.3723	24.9938	16.3973	16.3973	16.3973
Q96K17	BTF3L4	8.10328	8.22637	2	24.5965	24.5548	24.7198	16.3973	16.3973	16.3973
Q9BQ69	MACROD1	7.35503	8.2338	2	24.5548	24.5548	24.7837	16.3973	16.3973	16.3973
P42771	CDKN2A	8.10868	8.24514	2	24.593	24.7415	24.593	16.3973	16.3973	16.3973
P63165	SUMO1	3.5081	8.35494	2	23.7747	26.1501	24.332	16.3973	16.3973	16.3973
Q05519	SRSF11	6.26021	8.36043	2	25.0409	24.5581	24.6742	16.3973	16.3973	16.3973
P17096	HMGA1	2.25172	8.42831	2	21.868	25.4785	27.1305	16.3973	16.3973	16.3973
P49773	HINT1	4.22031	8.45271	2	25.6618	24.8824	24.0059	16.3973	16.3973	16.3973
Q01130	SRSF2	3.62591	8.63616	2	25.6578	25.7903	23.6523	16.3973	16.3973	16.3973
P35080	PFN2	10.8241	8.70805	2	25.0944	25.0944	25.1273	16.3973	16.3973	16.3973
Q9NR31	SAR1A	5.02955	8.72355	2	25.1771	25.6254	24.5601	16.3973	16.3973	16.3973
P61353	RPL27	4.74259	8.72946	2	25.1907	24.4654	25.7242	16.3973	16.3973	16.3973
P55769	SNU13	5.49803	8.74671	2	25.4442	24.678	25.3099	16.3973	16.3973	16.3973
P61923	COPZ1	4.95175	8.76694	2	25.3008	25.6457	24.5463	16.3973	16.3973	16.3973
P49721	PSMB2	4.70845	8.87315	2	24.8444	24.9422	26.0248	16.3973	16.3973	16.3973
Q9NX55	HYPK	8.66845	8.91661	2	25.2464	25.3146	25.3808	16.3973	16.3973	16.3973
P09234	SNRPC	7.60761	9.05221	2	25.5095	25.5339	25.3052	16.3973	16.3973	16.3973
P62136	PPP1CA	4.71977	9.09627	2	25.3713	24.8961	26.2135	16.3973	16.3973	16.3973
Q969Q0	RPL36AL	4.06337	9.10211	2	24.5664	26.5159	25.416	16.3973	16.3973	16.3973
P18077	RPL35A	4.16539	9.11526	2	26.0171	26.0726	24.448	16.3973	16.3973	16.3973
P61619	SEC61A1	7.7081	9.15015	2	25.4783	25.4783	25.6858	16.3973	16.3973	16.3973
Q02978	SLC25A11	5.81983	9.22677	2	25.2427	25.6754	25.9542	16.3973	16.3973	16.3973
P55795	HNRNPH2	7.73148	9.68949	2	25.9981	26.23	26.0324	16.3973	16.3973	16.3973
P14406	COX7A2	4.61728	9.69742	2	25.2256	26.4734	26.5852	16.3973	16.3973	16.3973
Q15750	TAB1	2.41513	9.7201	2	27.8491	27.6144	22.8889	16.3973	16.3973	16.3973
Q3ZCM7	TUBB8	7.18368	10.1717	2	26.3657	26.6326	26.7087	16.3973	16.3973	16.3973
P62304	SNRPE	8.18453	10.1831	2	26.5717	26.6859	26.4838	16.3973	16.3973	16.3973
Q02543	RPL18A	7.34478	10.4114	2	26.8834	26.9264	26.6163	16.3973	16.3973	16.3973
P62857	RPS28	5.29825	10.9108	2	27.4987	26.6644	27.7614	16.3973	16.3973	16.3973
P62917	RPL8	6.12414	10.921	2	27.2989	26.9723	27.6837	16.3973	16.3973	16.3973
P42766	RPL35	9.22291	10.9736	2	27.4402	27.3381	27.3344	16.3973	16.3973	16.3973
P61956	SUMO2	7.96754	11.0476	2	27.3849	27.3617	27.5881	16.3973	16.3973	16.3973
P84077	ARF1	7.70294	11.1909	2	27.6122	27.4308	27.7218	16.3973	16.3973	16.3973
P05386	RPLP1	3.17375	11.7694	2	29.5532	29.2777	29.3566	16.3973	16.3973	20.0846
O15020	SPTBN2	4.62342	1.58994	3	24.5858	24.5957	24.7433	22.9532	23.1134	23.0884
Q99584	S100A13	3.15406	1.94132	3	24.9202	25.422	25.4895	23.2487	23.2234	23.5356
O43504	LAMTOR5	2.44131	2.12301	3	24.4511	25.3218	24.4578	22.4284	23.0049	22.4284
P14174	MIF	2.87028	2.17594	3	29.2244	28.5898	28.6399	26.9906	26.3756	26.56
Q969H8	MYDGF	3.9096	3.91106	3	23.7845	23.6367	23.0402	19.4397	19.8488	19.4397
Q9H0A0	NAT10	2.87916	4.34029	3	20.3847	20.0261	21.8021	16.3973	16.3973	16.3973
Q86Y56	DNAAF5	4.44487	4.59656	3	21.2597	20.5395	21.1824	16.3973	16.3973	16.3973
Q14690	PDCD11	2.41316	4.74925	3	22.7274	20.3562	20.3562	16.3973	16.3973	16.3973
O15226	NKRF	2.9749	4.77894	3	22.3032	20.6128	20.6128	16.3973	16.3973	16.3973
Q7Z2W4	ZC3HAV1	4.38008	4.98456	3	20.9109	21.4389	21.7958	16.3973	16.3973	16.3973
P17612	PRKACA	5.63751	5.16435	3	21.433	21.433	21.8191	16.3973	16.3973	16.3973
O43290	SART1	4.25346	5.23043	3	21.3375	22.2084	21.3375	16.3973	16.3973	16.3973
Q02818	NUCB1	2.59039	5.24516	3	20.8607	23.2059	20.8607	16.3973	16.3973	16.3973
Q99575	POP1	2.90615	5.24929	3	22.9369	21.0015	21.0015	16.3973	16.3973	16.3973
Q5UIP0	RIF1	6.45463	5.25338	3	21.5974	21.8112	21.5435	16.3973	16.3973	16.3973
Q9ULA0	DNPEP	3.58242	5.27294	3	21.237	22.5368	21.237	16.3973	16.3973	16.3973
Q9P0L0	VAPA	3.88733	5.27483	3	20.951	22.096	21.9695	16.3973	16.3973	16.3973
O00764	PDXK	5.51035	5.31703	3	21.5718	21.5718	21.9995	16.3973	16.3973	16.3973
P52732	KIF11	3.88231	5.32426	3	22.4461	21.4601	21.2585	16.3973	16.3973	16.3973
P49643	PRIM2	3.72926	5.37287	3	21.3652	21.3652	22.5801	16.3973	16.3973	16.3973
Q9UJ83	HACL1	2.97074	5.49375	3	20.6328	22.2415	22.7989	16.3973	16.3973	16.3973
O43395	PRPF3	3.92241	5.57413	3	22.7219	21.5962	21.5962	16.3973	16.3973	16.3973
Q8WUA2	PPIL4	4.34079	5.62212	3	21.7228	22.6126	21.7228	16.3973	16.3973	16.3973
P98175	RBM10	3.01941	5.64923	3	21.3981	21.3981	23.3435	16.3973	16.3973	16.3973
Q92520	FAM3C	3.2662	5.65726	3	23.1754	21.4942	21.4942	16.3973	16.3973	16.3973
P12236	SLC25A6	4.26651	5.65791	3	30.191	29.5769	30.2062	24.7453	24.3152	23.9398
O75844	ZMPSTE24	2.52253	5.67796	3	20.9365	21.4767	23.8126	16.3973	16.3973	16.3973
P29992	GNA11	2.92924	5.68171	3	21.3904	23.4563	21.3904	16.3973	16.3973	16.3973
P82673	MRPS35	2.47014	5.70338	3	23.9326	21.1848	21.1848	16.3973	16.3973	16.3973
O43264	ZW10	4.29303	5.71788	3	22.7318	21.8658	21.7481	16.3973	16.3973	16.3973
Q3SY69	ALDH1L2	5.07232	5.72439	3	21.8197	22.0517	22.4937	16.3973	16.3973	16.3973
Q9H223	EHD4	4.71666	5.73241	3	21.8865	21.8865	22.6161	16.3973	16.3973	16.3973
Q9H6R4	NOL6	4.45084	5.73701	3	21.8504	21.8504	22.7022	16.3973	16.3973	16.3973
Q12797	ASPH	4.07406	5.75327	3	21.6256	22.0005	22.8257	16.3973	16.3973	16.3973
O75381	PEX14	3.00575	5.75836	3	21.3097	21.6866	23.4707	16.3973	16.3973	16.3973
Q9NYK5	MRPL39	4.24969	5.75931	3	22.5121	21.5173	22.4405	16.3973	16.3973	16.3973
Q53EL6	PDCD4	4.32182	5.75972	3	21.6059	22.1973	22.6679	16.3973	16.3973	16.3973
P35611	ADD1	2.95006	5.76421	3	21.3279	21.6262	23.5305	16.3973	16.3973	16.3973
Q8WVY7	UBLCP1	4.72408	5.77032	3	21.9239	21.9239	22.6551	16.3973	16.3973	16.3973
Q9NYH9	UTP6	3.98132	5.78951	3	22.9399	21.8103	21.8103	16.3973	16.3973	16.3973
Q6PKG0	LARP1	2.93638	5.80699	3	20.8056	22.8264	22.9809	16.3973	16.3973	16.3973
O15400	STX7	3.24874	5.81013	3	21.6259	21.6259	23.3705	16.3973	16.3973	16.3973
P27105	STOM	5.77415	5.81414	3	22.0647	22.4789	22.0909	16.3973	16.3973	16.3973
P09429	HMGB1	5.01772	5.81774	3	25.7377	26.0665	25.7907	20.3797	20.0031	19.7589
Q8TEQ6	GEMIN5	5.2458	5.82739	3	22.0427	22.0427	22.5888	16.3973	16.3973	16.3973
P61586	RHOA	2.80941	5.84198	3	27.0167	26.9445	27.2674	21.1047	19.996	22.6019
Q9UJU6	DBNL	4.71174	5.88488	3	21.7896	22.4508	22.6062	16.3973	16.3973	16.3973
Q16134	ETFDH	5.09129	5.88733	3	22.0836	22.6868	22.0836	16.3973	16.3973	16.3973
Q8IYS1	PM20D2	4.42466	5.90504	3	22.8954	21.9875	22.0242	16.3973	16.3973	16.3973
Q96EL3	MRPL53	2.80136	5.91342	3	20.9204	22.4147	23.5971	16.3973	16.3973	16.3973
A1L0T0	ILVBL	4.73903	5.9345	3	21.8575	22.4402	22.6977	16.3973	16.3973	16.3973
Q5T8P6	RBM26	12.6673	5.9438	3	22.3385	22.3385	22.3463	16.3973	16.3973	16.3973
O95817	BAG3	3.15877	5.94605	3	21.4841	21.9798	23.5662	16.3973	16.3973	16.3973
Q9NR33	POLE4	5.16226	5.96859	3	22.7573	22.1702	22.1702	16.3973	16.3973	16.3973
Q9H0U4	RAB1B	6.40401	5.97174	3	27.5896	27.3927	27.3844	21.5765	21.5242	21.3507
Q6PI48	DARS2	2.91124	5.97257	3	21.6381	21.6381	23.8334	16.3973	16.3973	16.3973
Q9ULX6	AKAP8L	3.29617	6.04948	3	22.3982	21.4524	23.4898	16.3973	16.3973	16.3973
Q9BRJ6	CHLSN	3.05725	6.05814	3	22.7494	23.4581	21.1589	16.3973	16.3973	16.3973
Q6L8Q7	PDE12	4.14114	6.06524	3	22.1042	22.1022	23.1813	16.3973	16.3973	16.3973
Q9UPN9	TRIM33	5.1196	6.07127	3	22.8599	22.1729	22.3729	16.3973	16.3973	16.3973
O60232	ZNRD2	4.64658	6.08226	3	22.0338	22.9625	22.4425	16.3973	16.3973	16.3973
Q96HE7	ERO1A	3.78305	6.08829	3	22.041	22.041	23.3749	16.3973	16.3973	16.3973
P49770	EIF2B2	3.23147	6.09912	3	22.6915	21.3441	23.4537	16.3973	16.3973	16.3973
P31937	HIBADH	7.50543	6.13465	3	22.4418	22.6223	22.5318	16.3973	16.3973	16.3973
Q96GK7	FAHD2A	3.47628	6.13985	3	22.1286	21.8813	23.6017	16.3973	16.3973	16.3973
Q8NFH3	NUP43	6.27798	6.14885	3	22.5781	22.3489	22.7116	16.3973	16.3973	16.3973
Q9NRH3	TUBG2	10.4781	6.15216	3	22.5684	22.5401	22.5401	16.3973	16.3973	16.3973
Q9NY33	DPP3	2.82481	6.16917	3	21.2123	22.5171	23.9701	16.3973	16.3973	16.3973
Q9H9A6	LRRC40	5.12658	6.20238	3	22.3921	23.0149	22.3921	16.3973	16.3973	16.3973
O00429	DNM1L	4.33523	6.22829	3	23.2849	22.296	22.296	16.3973	16.3973	16.3973
P84095	RHOG	5.5168	6.23823	3	22.4689	22.4689	22.9689	16.3973	16.3973	16.3973
Q9NVX2	NLE1	4.1278	6.29923	3	23.1439	22.9967	21.9491	16.3973	16.3973	16.3973
Q07866	KLC1	4.05847	6.3021	3	22.5564	23.4382	22.1036	16.3973	16.3973	16.3973
P26885	FKBP2	3.34165	6.30226	3	22.1027	23.8935	22.1027	16.3973	16.3973	16.3973
Q9UHB6	LIMA1	5.34261	6.32729	3	22.3534	22.9485	22.8719	16.3973	16.3973	16.3973
Q9NYL9	TMOD3	2.99159	6.3371	3	23.7335	21.2899	23.1799	16.3973	16.3973	16.3973
O00139	KIF2A	4.50195	6.3429	3	22.691	22.2388	23.2909	16.3973	16.3973	16.3973
O94788	ALDH1A2	3.63663	6.3479	3	22.24	22.24	23.7556	16.3973	16.3973	16.3973
Q9H993	ARMT1	2.55759	6.35019	3	23.8188	23.6039	20.8199	16.3973	16.3973	16.3973
P49903	SEPHS1	3.32971	6.3976	3	22.0469	22.3337	24.0042	16.3973	16.3973	16.3973
P53634	CTSC	3.86738	6.41066	3	22.6942	22.0993	23.6304	16.3973	16.3973	16.3973
P62851	RPS25	4.42547	6.41806	3	28.7685	28.4551	28.443	22.7459	21.8333	21.8333
O15116	LSM1	4.83767	6.43437	3	22.5772	22.5772	23.3407	16.3973	16.3973	16.3973
A6NDG6	PGP	3.04185	6.47456	3	21.7574	24.2547	22.6035	16.3973	16.3973	16.3973
P51649	ALDH5A1	3.1161	6.47489	3	23.6197	23.5265	21.4704	16.3973	16.3973	16.3973
Q8WXX5	DNAJC9	4.7911	6.48255	3	22.6478	23.4055	22.5863	16.3973	16.3973	16.3973
Q9GZN8	ADISSP	3.19753	6.4926	3	22.22	22.22	24.2299	16.3973	16.3973	16.3973
Q9NQT5	EXOSC3	5.64293	6.4962	3	22.7227	22.7418	23.2161	16.3973	16.3973	16.3973
Q13155	AIMP2	2.5951	6.49843	3	24.2605	23.1832	23.9746	19.1284	16.3973	16.3973
Q5JTZ9	AARS2	5.50627	6.502	3	23.1161	22.5535	23.0284	16.3973	16.3973	16.3973
Q9BXW7	HDHD5	5.72071	6.52592	3	22.7682	22.7682	23.2332	16.3973	16.3973	16.3973
Q9UH65	SWAP70	6.26456	6.52802	3	22.812	23.152	22.812	16.3973	16.3973	16.3973
Q8IY67	RAVER1	3.71052	6.52814	3	22.428	23.9204	22.428	16.3973	16.3973	16.3973
O00217	NDUFS8	4.0386	6.53105	3	23.6685	22.8672	22.2494	16.3973	16.3973	16.3973
P05114	HMGN1	4.11532	6.53304	3	22.16	23.1806	23.4505	16.3973	16.3973	16.3973
Q9NUQ3	TXLNG	3.27367	6.53838	3	22.0112	22.6193	24.1766	16.3973	16.3973	16.3973
Q14254	FLOT2	3.22644	6.54698	3	24.249	22.0768	22.5071	16.3973	16.3973	16.3973
Q9NTJ5	SACM1L	5.51263	6.58547	3	22.8064	23.3355	22.8064	16.3973	16.3973	16.3973
P53004	BLVRA	3.51169	6.58842	3	24.1104	22.3409	22.5058	16.3973	16.3973	16.3973
Q9BYT8	NLN	2.88298	6.63587	3	22.2061	22.2061	24.6873	16.3973	16.3973	16.3973
Q5TDH0	DDI2	3.6811	6.63642	3	22.5192	22.5192	24.0628	16.3973	16.3973	16.3973
O75312	ZPR1	2.90511	6.64461	3	22.2248	22.2248	24.6762	16.3973	16.3973	16.3973
Q13428	TCOF1	4.45284	6.66316	3	22.4712	23.6101	23.1002	16.3973	16.3973	16.3973
P20073	ANXA7	4.76928	6.66764	3	23.4676	22.5408	23.1865	16.3973	16.3973	16.3973
Q15942	ZYX	4.59954	6.68063	3	22.9479	23.6561	22.6299	16.3973	16.3973	16.3973
P24941	CDK2	3.81208	6.69485	3	22.7595	22.4773	24.0397	16.3973	16.3973	16.3973
Q9UKD2	MRTO4	5.59509	6.72249	3	23.397	22.8058	23.1566	16.3973	16.3973	16.3973
Q9UI12	ATP6V1H	7.35617	6.72428	3	23.2419	23.0892	23.0337	16.3973	16.3973	16.3973
P28161	GSTM2	3.41747	6.72924	3	24.3454	22.5172	22.5172	16.3973	16.3973	16.3973
Q8WWH5	TRUB1	5.0499	6.73077	3	23.4352	23.2838	22.6653	16.3973	16.3973	16.3973
Q96HC4	PDLIM5	3.42388	6.73421	3	22.9193	22.2015	24.2738	16.3973	16.3973	16.3973
O75607	NPM3	3.84476	6.74749	3	24.0432	22.9648	22.4265	16.3973	16.3973	16.3973
Q9Y371	SH3GLB1	3.20848	6.76461	3	22.4684	24.5489	22.4684	16.3973	16.3973	16.3973
P48556	PSMD8	2.18991	6.77279	3	23.9181	20.6411	24.9511	16.3973	16.3973	16.3973
Q96HY6	DDRGK1	4.1475	6.78147	3	23.0355	23.9326	22.5683	16.3973	16.3973	16.3973
P09455	RBP1	4.75677	6.78263	3	23.3748	22.6258	23.5393	16.3973	16.3973	16.3973
Q8N766	EMC1	3.54417	6.78367	3	22.6109	24.3211	22.6109	16.3973	16.3973	16.3973
P15927	RPA2	2.87355	6.79104	3	21.6625	23.2973	24.6053	16.3973	16.3973	16.3973
P49589	CARS1	4.93344	6.8118	3	22.707	23.5367	23.3836	16.3973	16.3973	16.3973
P49753	ACOT2	5.42332	6.82024	3	23.0252	23.0252	23.6022	16.3973	16.3973	16.3973
Q9BRA2	TXNDC17	2.53088	6.86788	3	23.723	21.2401	24.8325	16.3973	16.3973	16.3973
Q9BWJ5	SF3B5	3.63746	6.87729	3	23.9753	23.652	22.1965	16.3973	16.3973	16.3973
Q5T440	IBA57	4.57791	6.90284	3	23.9336	23.0187	22.9482	16.3973	16.3973	16.3973
P57740	NUP107	4.74934	6.90516	3	23.8774	23.015	23.015	16.3973	16.3973	16.3973
Q9GZS3	SKIC8	7.29178	6.93412	3	23.3238	23.4505	23.2201	16.3973	16.3973	16.3973
P40855	PEX19	5.41919	6.93744	3	22.9603	23.4211	23.6229	16.3973	16.3973	16.3973
Q9Y3B9	RRP15	3.71646	6.95092	3	23.8405	22.2933	23.9109	16.3973	16.3973	16.3973
P41240	CSK	4.16855	6.98349	3	22.9736	22.9736	24.1953	16.3973	16.3973	16.3973
P82650	MRPS22	2.8942	7.03326	3	21.776	23.7878	24.728	16.3973	16.3973	16.3973
Q96TA2	YME1L1	4.72825	7.03934	3	22.9898	23.998	23.3222	16.3973	16.3973	16.3973
P14209	CD99	3.83269	7.04409	3	23.9689	22.4425	23.9129	16.3973	16.3973	16.3973
Q86SX6	GLRX5	4.0717	7.06189	3	22.7519	24.2536	23.3721	16.3973	16.3973	16.3973
Q8WU90	ZC3H15	2.79296	7.08178	3	21.8736	23.461	25.1027	16.3973	16.3973	16.3973
Q9UKF6	CPSF3	4.35834	7.09761	3	22.7586	23.9372	23.7889	16.3973	16.3973	16.3973
P61006	RAB8A	4.51584	7.10481	3	22.9119	24.0848	23.5097	16.3973	16.3973	16.3973
O60701	UGDH	3.82266	7.10722	3	22.9974	22.9974	24.5189	16.3973	16.3973	16.3973
Q9NTX5	ECHDC1	9.34768	7.1138	3	23.4902	23.4902	23.553	16.3973	16.3973	16.3973
Q9Y3E5	PTRH2	4.4453	7.12763	3	22.8547	23.6632	24.057	16.3973	16.3973	16.3973
Q6IAA8	LAMTOR1	4.26423	7.13072	3	24.3147	23.1347	23.1347	16.3973	16.3973	16.3973
P30043	BLVRB	3.58674	7.14312	3	22.8762	24.7076	23.0375	16.3973	16.3973	16.3973
Q99956	DUSP9	4.78253	7.15072	3	23.1365	23.3949	24.1127	16.3973	16.3973	16.3973
O43324	EEF1E1	3.75539	7.15172	3	23.9257	22.5011	24.2204	16.3973	16.3973	16.3973
P09132	SRP19	4.06922	7.15288	3	22.6669	23.963	24.0207	16.3973	16.3973	16.3973
Q8WWY3	PRPF31	8.89124	7.16172	3	23.5144	23.5539	23.6089	16.3973	16.3973	16.3973
Q14651	PLS1	5.51766	7.1746	3	23.3803	23.9551	23.3803	16.3973	16.3973	16.3973
P11388	TOP2A	3.45415	7.18977	3	24.7562	22.5635	23.4416	16.3973	16.3973	16.3973
O95394	PGM3	5.05019	7.21238	3	23.3574	23.3574	24.1143	16.3973	16.3973	16.3973
P61254	RPL26	3.17682	7.21401	3	25.0097	23.3994	22.4249	16.3973	16.3973	16.3973
P34949	MPI	3.89042	7.26957	3	23.5815	24.57	22.8492	16.3973	16.3973	16.3973
P40938	RFC3	6.66425	7.27859	3	23.5526	23.6004	23.8747	16.3973	16.3973	16.3973
Q9Y2R0	COA3	2.1981	7.27961	3	24.6898	25.4108	20.9302	16.3973	16.3973	16.3973
Q9H307	PNN	3.60216	7.29232	3	22.5277	24.4698	24.0714	16.3973	16.3973	16.3973
Q92530	PSMF1	6.12461	7.30453	3	23.6934	23.4681	23.9441	16.3973	16.3973	16.3973
Q9H8H0	NOL11	6.77615	7.31184	3	23.6256	23.6041	23.8978	16.3973	16.3973	16.3973
Q9BRP8	PYM1	4.10001	7.31696	3	22.828	24.1076	24.2072	16.3973	16.3973	16.3973
P41214	EIF2D	11.0605	7.33035	3	23.7196	23.7438	23.7196	16.3973	16.3973	16.3973
Q9UBB4	ATXN10	7.6614	7.33716	3	23.6816	23.8483	23.6735	16.3973	16.3973	16.3973
P43034	PAFAH1B1	5.12553	7.3412	3	23.6291	23.3781	24.2084	16.3973	16.3973	16.3973
Q13907	IDI1	3.79973	7.3434	3	22.684	24.3622	24.176	16.3973	16.3973	16.3973
Q14137	BOP1	4.22001	7.34879	3	23.2931	24.5768	23.3685	16.3973	16.3973	16.3973
Q16527	CSRP2	5.81412	7.36522	3	23.4327	23.8981	23.9568	16.3973	16.3973	16.3973
P09543	CNP	6.55886	7.37126	3	23.6606	23.6606	23.9846	16.3973	16.3973	16.3973
P25325	MPST	4.55305	7.37591	3	23.2173	24.4023	23.7001	16.3973	16.3973	16.3973
Q0VDF9	HSPA14	5.59304	7.37941	3	23.5881	24.1541	23.5881	16.3973	16.3973	16.3973
P27144	AK4	3.65187	7.3939	3	23.3916	24.94	23.042	16.3973	16.3973	16.3973
Q99627	COPS8	2.83605	7.39934	3	21.9321	24.4235	25.0343	16.3973	16.3973	16.3973
P62879	GNB2	4.62945	7.40597	3	23.747	23.2611	24.4017	16.3973	16.3973	16.3973
P61086	UBE2K	3.62528	7.4095	3	22.7387	24.7898	23.892	16.3973	16.3973	16.3973
P04350	TUBB4A	5.3134	7.4253	3	23.3807	24.097	23.9901	16.3973	16.3973	16.3973
Q9UN86	G3BP2	2.82782	7.43409	3	21.9155	24.7637	24.815	16.3973	16.3973	16.3973
Q92797	SYMPK	3.53361	7.43938	3	24.1739	22.6184	24.7178	16.3973	16.3973	16.3973
Q16850	CYP51A1	7.39962	7.46874	3	23.9374	23.9295	23.7313	16.3973	16.3973	16.3973
P21283	ATP6V1C1	3.25609	7.4931	3	22.4349	24.3285	24.9078	16.3973	16.3973	16.3973
Q8N0X7	SPART	5.06075	7.49371	3	23.8037	24.3795	23.4898	16.3973	16.3973	16.3973
O15347	HMGB3	4.35387	7.50807	3	24.6898	23.467	23.5594	16.3973	16.3973	16.3973
Q8NBU5	ATAD1	6.51702	7.51263	3	23.7972	23.7972	24.1355	16.3973	16.3973	16.3973
O43670	ZNF207	3.24224	7.53415	3	25.1755	22.5621	24.0568	16.3973	16.3973	16.3973
Q86Y82	STX12	3.90028	7.55837	3	23.6907	23.2254	24.9509	16.3973	16.3973	16.3973
Q96P16	RPRD1A	5.02555	7.57352	3	24.5045	23.6488	23.7593	16.3973	16.3973	16.3973
P30085	CMPK1	4.94487	7.57795	3	24.5296	23.7855	23.6108	16.3973	16.3973	16.3973
Q9BUF5	TUBB6	2.86551	7.58634	3	25.3903	24.4009	22.1599	16.3973	16.3973	16.3973
P51570	GALK1	5.14495	7.60392	3	24.439	23.998	23.5667	16.3973	16.3973	16.3973
Q9H7Z7	PTGES2	4.0709	7.63389	3	23.56	24.9736	23.56	16.3973	16.3973	16.3973
Q9Y5J7	TIMM9	7.28149	7.64495	3	23.9223	24.0275	24.177	16.3973	16.3973	16.3973
Q13610	PWP1	4.54426	7.64497	3	23.3404	24.5192	24.2673	16.3973	16.3973	16.3973
Q99961	SH3GL1	3.95262	7.64601	3	23.0511	24.7092	24.3697	16.3973	16.3973	16.3973
Q9NVS9	PNPO	6.62348	7.6495	3	23.9301	24.2626	23.9478	16.3973	16.3973	16.3973
Q9Y2Q3	GSTK1	4.52117	7.65189	3	24.7763	23.6778	23.6936	16.3973	16.3973	16.3973
Q9H488	POFUT1	4.66388	7.6564	3	24.1197	24.598	23.4435	16.3973	16.3973	16.3973
P53597	SUCLG1	3.49596	7.66533	3	25.3198	23.0702	23.798	16.3973	16.3973	16.3973
P48637	GSS	4.27301	7.70489	3	23.3613	24.8257	24.1197	16.3973	16.3973	16.3973
Q96AB3	ISOC2	4.75769	7.71134	3	23.8833	23.7036	24.7391	16.3973	16.3973	16.3973
P47755	CAPZA2	3.68631	7.73409	3	24.9483	22.9669	24.479	16.3973	16.3973	16.3973
O75663	TIPRL	4.94807	7.76264	3	24.736	23.8719	23.8719	16.3973	16.3973	16.3973
Q16698	DECR1	4.95914	7.78069	3	24.7518	23.8911	23.8911	16.3973	16.3973	16.3973
Q13405	MRPL49	4.3538	7.78213	3	24.199	24.8752	23.4641	16.3973	16.3973	16.3973
Q9Y6E2	BZW2	3.53739	7.78714	3	24.233	25.2974	23.023	16.3973	16.3973	16.3973
Q9UIJ7	AK3	7.21503	7.78805	3	24.1072	24.1072	24.3418	16.3973	16.3973	16.3973
Q9NQW7	XPNPEP1	6.6742	7.80675	3	24.2802	23.9927	24.3393	16.3973	16.3973	16.3973
Q15436	SEC23A	3.93269	7.81656	3	24.4267	23.2205	24.9944	16.3973	16.3973	16.3973
P37198	NUP62	4.64481	7.82112	3	24.6333	23.5316	24.4904	16.3973	16.3973	16.3973
Q9UBI6	GNG12	5.53908	7.83387	3	24.6414	23.9825	24.0697	16.3973	16.3973	16.3973
P84157	MXRA7	4.1223	7.86139	3	23.3373	24.5503	24.8885	16.3973	16.3973	16.3973
P11233	RALA	4.03842	7.86928	3	23.3523	24.3947	25.0527	16.3973	16.3973	16.3973
O00170	AIP	4.08662	7.87488	3	24.6057	24.8881	23.3228	16.3973	16.3973	16.3973
Q5TFE4	NT5DC1	5.78932	7.87553	3	24.0931	24.0931	24.6324	16.3973	16.3973	16.3973
Q8N4Q1	CHCHD4	7.91591	7.87624	3	24.2207	24.3792	24.2207	16.3973	16.3973	16.3973
Q96CN7	ISOC1	3.66524	7.88902	3	23.1558	25.2816	24.4217	16.3973	16.3973	16.3973
Q16881	TXNRD1	4.73517	7.89458	3	23.6523	24.4616	24.7618	16.3973	16.3973	16.3973
P61026	RAB10	5.02596	7.90963	3	23.8168	24.3153	24.7887	16.3973	16.3973	16.3973
Q9BSD7	NTPCR	6.39746	7.92524	3	24.1951	24.5774	24.1951	16.3973	16.3973	16.3973
Q9BQ52	ELAC2	4.06328	7.93066	3	23.3616	24.969	24.6534	16.3973	16.3973	16.3973
P53701	HCCS	7.87032	7.93206	3	24.4366	24.294	24.2576	16.3973	16.3973	16.3973
P62993	GRB2	4.51441	7.93855	3	23.9572	23.9572	25.0932	16.3973	16.3973	16.3973
P60981	DSTN	2.07984	7.96067	3	25.7462	26.1493	26.0851	21.304	16.3973	16.3973
Q99426	TBCB	4.3608	7.98569	3	23.8136	24.1413	25.1941	16.3973	16.3973	16.3973
O15371	EIF3D	4.39375	7.99119	3	23.5889	24.6407	24.936	16.3973	16.3973	16.3973
P46976	GYG1	5.40737	8.00087	3	24.1705	24.1705	24.8536	16.3973	16.3973	16.3973
Q92769	HDAC2	4.28599	8.00306	3	24.0613	25.2654	23.8745	16.3973	16.3973	16.3973
Q53H12	AGK	5.28448	8.01784	3	24.701	24.6168	23.9277	16.3973	16.3973	16.3973
P61916	NPC2	5.66384	8.02156	3	24.0814	24.412	24.7633	16.3973	16.3973	16.3973
P50213	IDH3A	8.76051	8.02461	3	24.4881	24.3888	24.3888	16.3973	16.3973	16.3973
Q86W42	THOC6	3.19219	8.05531	3	24.3639	23.0548	25.9393	16.3973	16.3973	16.3973
P46776	RPL27A	3.29004	8.06534	3	23.4752	23.8934	26.0194	16.3973	16.3973	16.3973
P55327	TPD52	4.76955	8.07013	3	25.1197	24.2492	24.0335	16.3973	16.3973	16.3973
Q9UMX5	NENF	4.28404	8.07269	3	25.3503	24.0298	24.0298	16.3973	16.3973	16.3973
Q99757	TXN2	6.01692	8.0822	3	24.159	24.6787	24.6009	16.3973	16.3973	16.3973
Q9BV20	MRI1	4.97718	8.09034	3	24.3288	25.0595	24.0747	16.3973	16.3973	16.3973
Q5JTJ3	COA6	4.16217	8.09828	3	24.8061	23.5647	25.1161	16.3973	16.3973	16.3973
P08574	CYC1	4.39558	8.09874	3	24.5759	23.7426	25.1696	16.3973	16.3973	16.3973
O75306	NDUFS2	4.03217	8.11921	3	25.4337	24.4548	23.6611	16.3973	16.3973	16.3973
P14927	UQCRB	3.84665	8.14053	3	23.6263	24.3926	25.5946	16.3973	16.3973	16.3973
O95777	LSM8	4.77845	8.19442	3	24.7035	25.1087	23.963	16.3973	16.3973	16.3973
O00154	ACOT7	4.022	8.19726	3	25.4049	24.7558	23.6231	16.3973	16.3973	16.3973
P23368	ME2	7.28631	8.20895	3	24.6381	24.4561	24.7246	16.3973	16.3973	16.3973
Q9GZT3	SLIRP	6.57215	8.21904	3	24.8507	24.4585	24.5399	16.3973	16.3973	16.3973
Q9NP97	DYNLRB1	4.43417	8.28066	3	24.3603	25.4986	24.175	16.3973	16.3973	16.3973
Q96A26	FAM162A	6.62778	8.29129	3	24.5215	24.9134	24.6309	16.3973	16.3973	16.3973
P13995	MTHFD2	4.26925	8.31043	3	23.7948	25.1249	25.2035	16.3973	16.3973	16.3973
O43768	ENSA	4.96422	8.31729	3	25.2956	24.259	24.5892	16.3973	16.3973	16.3973
P19388	POLR2E	6.03565	8.32819	3	25.013	24.722	24.4416	16.3973	16.3973	16.3973
P37840	SNCA	4.92553	8.36462	3	24.3649	25.3828	24.5381	16.3973	16.3973	16.3973
Q12907	LMAN2	4.20664	8.41958	3	24.3515	25.7772	24.322	16.3973	16.3973	16.3973
P63000	RAC1	3.22467	8.43097	3	23.7452	24.2216	26.5181	16.3973	16.3973	16.3973
O95573	ACSL3	5.6062	8.53844	3	24.5121	25.0687	25.2264	16.3973	16.3973	16.3973
P53985	SLC16A1	11.983	8.5736	3	24.982	24.9654	24.9654	16.3973	16.3973	16.3973
Q9NX63	CHCHD3	5.65238	8.57473	3	24.6475	24.8985	25.3702	16.3973	16.3973	16.3973
P20962	PTMS	2.11621	8.58328	3	21.5268	26.7506	26.6644	16.3973	16.3973	16.3973
P07339	CTSD	4.20432	8.60092	3	25.9807	24.5049	24.5091	16.3973	16.3973	16.3973
P54105	CLNS1A	6.5594	8.60149	3	24.7748	25.0109	25.2107	16.3973	16.3973	16.3973
P11279	LAMP1	5.58515	8.60991	3	24.5846	25.1058	25.3313	16.3973	16.3973	16.3973
Q9Y383	LUC7L2	5.24614	8.63275	3	24.4912	25.2817	25.3173	16.3973	16.3973	16.3973
O60493	SNX3	6.05353	8.67091	3	25.3381	25.1123	24.7542	16.3973	16.3973	16.3973
P14324	FDPS	4.78576	8.67524	3	25.1823	25.6227	24.4127	16.3973	16.3973	16.3973
P14550	AKR1A1	6.55238	8.67968	3	25.3323	24.9494	24.9494	16.3973	16.3973	16.3973
Q9Y3A6	TMED5	6.19421	8.75676	3	25.4193	24.8717	25.1712	16.3973	16.3973	16.3973
P30519	HMOX2	3.84871	8.77417	3	25.9755	23.9596	25.5793	16.3973	16.3973	16.3973
P83731	RPL24	4.3206	8.81946	3	24.4093	26.0399	25.2012	16.3973	16.3973	16.3973
P62847	RPS24	6.25175	8.85827	3	24.9683	25.2988	25.4997	16.3973	16.3973	16.3973
Q01650	SLC7A5	4.31074	8.91386	3	24.3679	25.6428	25.9229	16.3973	16.3973	16.3973
Q9Y5S9	RBM8A	7.99961	9.00968	3	25.2952	25.4869	25.4389	16.3973	16.3973	16.3973
O14929	HAT1	5.85683	9.0586	3	25.0761	25.7483	25.5433	16.3973	16.3973	16.3973
Q01844	EWSR1	5.81321	9.06524	3	25.8303	25.4323	25.1251	16.3973	16.3973	16.3973
O95433	AHSA1	7.13285	9.09891	3	25.6756	25.4649	25.3482	16.3973	16.3973	16.3973
P48444	ARCN1	5.71769	9.13615	3	25.1044	25.8086	25.6875	16.3973	16.3973	16.3973
P09496	CLTA	12.7776	9.14513	3	25.5387	25.5387	25.5499	16.3973	16.3973	16.3973
P43307	SSR1	7.47838	9.19645	3	25.501	25.5286	25.7517	16.3973	16.3973	16.3973
P61088	UBE2N	2.28396	9.23419	3	27.1767	27.2115	27.5	21.391	16.3973	16.3973
Q96CX2	KCTD12	7.40144	9.25054	3	25.8146	25.5584	25.5706	16.3973	16.3973	16.3973
P63173	RPL38	5.83487	9.26142	3	25.3892	25.5238	26.0633	16.3973	16.3973	16.3973
Q9BQE3	TUBA1C	6.73736	9.31332	3	25.4644	25.8308	25.8367	16.3973	16.3973	16.3973
Q9UMX0	UBQLN1	5.01142	9.31607	3	26.3368	25.1975	25.606	16.3973	16.3973	16.3973
P42126	ECI1	4.86814	9.37422	3	25.1512	25.7508	26.4126	16.3973	16.3973	16.3973
Q16629	SRSF7	3.25161	9.41318	3	25.9089	27.3882	24.1345	16.3973	16.3973	16.3973
Q14019	COTL1	9.41033	9.44401	3	25.8854	25.7929	25.8457	16.3973	16.3973	16.3973
P42677	RPS27	4.98498	9.68677	3	26.3195	25.3921	26.5406	16.3973	16.3973	16.3973
Q05639	EEF1A2	7.15916	9.6944	3	26.2074	26.1763	25.8915	16.3973	16.3973	16.3973
Q9UHV9	PFDN2	5.68992	9.71781	3	25.8369	25.9263	26.5822	16.3973	16.3973	16.3973
P49720	PSMB3	15.0273	9.74721	3	26.1449	26.1425	26.1462	16.3973	16.3973	16.3973
P82979	SARNP	7.95222	9.80106	3	26.2467	26.2776	26.0709	16.3973	16.3973	16.3973
P13073	COX4I1	4.00702	9.98134	3	25.1027	27.0925	26.9408	16.3973	16.3973	16.3973
P35268	RPL22	4.84965	10.0921	3	27.2822	26.0971	26.089	16.3973	16.3973	16.3973
P62750	RPL23A	5.65283	10.1999	3	26.8165	26.0947	26.8804	16.3973	16.3973	16.3973
O75964	ATP5MG	8.13816	10.2456	3	26.7019	26.522	26.7049	16.3973	16.3973	16.3973
P60866	RPS20	5.34122	10.4718	3	26.7102	27.4668	26.4303	16.3973	16.3973	16.3973
P06753	TPM3	9.78678	10.5116	3	26.8849	26.8848	26.9569	16.3973	16.3973	16.3973
P62899	RPL31	4.59397	10.562	3	26.0643	27.7127	27.1009	16.3973	16.3973	16.3973
Q13185	CBX3	6.32439	11.0424	3	27.4543	27.112	27.753	16.3973	16.3973	16.3973
O95299	NDUFA10	3.26421	2.25533	4	24.2823	24.77	24.4717	22.0078	22.1637	22.5864
P04080	CSTB	3.05577	3.67089	4	26.409	26.91	27.0878	22.4161	23.5372	23.4409
P50579	METAP2	2.52246	4.07482	4	19.8387	19.8387	21.739	16.3973	16.3973	16.3973
Q15424	SAFB	2.9252	4.11511	4	23.0141	22.7373	23.1515	18.3676	19.8223	18.3676
Q15819	UBE2V2	3.49683	4.17697	4	25.8926	26.9345	26.9627	22.3074	22.3783	22.5731
O95104	SCAF4	2.80199	4.6371	4	20.4274	20.4274	22.2485	16.3973	16.3973	16.3973
Q13576	IQGAP2	2.73477	5.10011	4	20.4023	22.788	21.302	16.3973	16.3973	16.3973
P53007	SLC25A1	2.60088	5.12116	4	25.5525	25.7544	25.9843	19.8946	19.8946	22.1386
P00403	MT-CO2	3.24303	5.48109	4	26.6431	27.5275	27.2714	21.1825	21.1825	22.6337
P35269	GTF2F1	2.81198	5.55953	4	22.3066	20.5662	22.9978	16.3973	16.3973	16.3973
P09417	QDPR	2.47357	5.57904	4	21.0823	21.0823	23.7645	16.3973	16.3973	16.3973
P11172	UMPS	2.3949	5.59465	4	23.6684	21.8978	20.4098	16.3973	16.3973	16.3973
O14654	IRS4	3.81993	5.83923	4	23.0712	21.8192	21.8192	16.3973	16.3973	16.3973
Q15020	SART3	4.515	5.85184	4	22.2501	22.732	21.7654	16.3973	16.3973	16.3973
Q99614	TTC1	3.81593	6.01863	4	21.732	23.2128	22.303	16.3973	16.3973	16.3973
P05141	SLC25A5	3.65802	6.04182	4	27.296	28.6996	28.6466	22.0518	22.4132	22.0518
O00541	PES1	2.54011	6.07064	4	20.9318	22.3176	24.1545	16.3973	16.3973	16.3973
Q96KP4	CNDP2	3.29015	6.23852	4	22.3103	21.7817	23.8155	16.3973	16.3973	16.3973
O94760	DDAH1	5.41244	6.27848	4	22.4977	22.4977	23.0321	16.3973	16.3973	16.3973
Q5JRX3	PITRM1	3.15174	6.29594	4	22.0256	22.0256	24.0286	16.3973	16.3973	16.3973
P33316	DUT	4.78581	6.31598	4	26.6263	27.4308	27.0708	20.947	20.6165	20.6165
Q12996	CSTF3	2.61334	6.32929	4	23.6479	23.6654	20.8666	16.3973	16.3973	16.3973
P30876	POLR2B	3.37589	6.40683	4	23.9909	22.1434	22.2782	16.3973	16.3973	16.3973
Q9H845	ACAD9	2.75523	6.41433	4	21.5582	22.4083	24.4684	16.3973	16.3973	16.3973
Q9BRX2	PELO	3.79727	6.42991	4	22.4344	23.755	22.2923	16.3973	16.3973	16.3973
Q9H6T3	RPAP3	4.57426	6.43557	4	22.3249	22.822	23.3518	16.3973	16.3973	16.3973
Q9BQP7	MGME1	2.91711	6.4387	4	22.0499	22.0499	24.4082	16.3973	16.3973	16.3973
Q04760	GLO1	3.17924	6.43915	4	27.377	27.8643	28.1003	22.6156	20.7043	20.7043
O96005	CLPTM1	6.42247	6.44412	4	22.7584	22.7214	23.0446	16.3973	16.3973	16.3973
Q969V3	NCLN	3.17322	6.4456	4	22.1681	22.1681	24.1926	16.3973	16.3973	16.3973
P78406	RAE1	6.03593	6.44868	4	22.7183	23.1014	22.7183	16.3973	16.3973	16.3973
Q5JRA6	MIA3	8.07314	6.48848	4	22.8461	22.9653	22.8461	16.3973	16.3973	16.3973
Q8IXI1	RHOT2	10.7938	6.52166	4	22.9106	22.9357	22.9106	16.3973	16.3973	16.3973
P40937	RFC5	2.84713	6.55531	4	22.2172	22.022	24.6187	16.3973	16.3973	16.3973
P22059	OSBP	7.16463	6.58138	4	23.0917	22.8565	22.9879	16.3973	16.3973	16.3973
Q9HB07	MYG1	2.80029	6.61349	4	24.4397	23.1462	21.4466	16.3973	16.3973	16.3973
Q9Y3D9	MRPS23	3.97021	6.69106	4	22.4843	22.841	23.9398	16.3973	16.3973	16.3973
O94874	UFL1	3.23646	6.6963	4	22.0279	24.3446	22.9084	16.3973	16.3973	16.3973
P23786	CPT2	3.30062	6.69822	4	21.9163	24.1594	23.2109	16.3973	16.3973	16.3973
O14776	TCERG1	3.6296	6.71393	4	22.5747	24.1843	22.5747	16.3973	16.3973	16.3973
Q5JSH3	WDR44	4.95801	6.71415	4	23.0213	23.5784	22.7347	16.3973	16.3973	16.3973
P52306	RAP1GDS1	4.35358	6.7172	4	22.7935	22.7329	23.8171	16.3973	16.3973	16.3973
Q5H9R7	PPP6R3	4.79809	6.72805	4	23.6369	23.0314	22.7078	16.3973	16.3973	16.3973
Q9BYG3	NIFK	8.70413	6.73786	4	23.0798	23.1761	23.1497	16.3973	16.3973	16.3973
P61201	COPS2	3.61692	6.7542	4	23.7621	22.0668	23.6257	16.3973	16.3973	16.3973
P06865	HEXA	3.51858	6.78128	4	23.4554	22.0673	24.0132	16.3973	16.3973	16.3973
P43246	MSH2	5.85386	6.78957	4	22.9119	23.2234	23.4253	16.3973	16.3973	16.3973
Q13123	IK	4.6332	6.8022	4	23.1763	22.6869	23.7353	16.3973	16.3973	16.3973
Q15003	NCAPH	3.74578	6.81623	4	22.1989	23.7886	23.6532	16.3973	16.3973	16.3973
P84090	ERH	3.73547	6.84315	4	27.5105	27.4942	27.8027	20.6341	21.6882	19.9556
Q96ER9	CCDC51	4.27022	6.85579	4	22.5888	23.8935	23.2771	16.3973	16.3973	16.3973
Q9BXK5	BCL2L13	5.89625	6.85806	4	23.5498	23.1082	23.1082	16.3973	16.3973	16.3973
O60716	CTNND1	4.68294	6.87462	4	23.5023	23.6317	22.6819	16.3973	16.3973	16.3973
Q6FI81	CIAPIN1	5.98597	6.89172	4	23.0899	23.5602	23.217	16.3973	16.3973	16.3973
Q8N183	NDUFAF2	3.06007	6.9439	4	22.0094	23.3106	24.7036	16.3973	16.3973	16.3973
O75400	PRPF40A	4.707	6.95242	4	23.9365	22.981	23.1317	16.3973	16.3973	16.3973
Q03701	CEBPZ	3.11832	6.99144	4	24.0751	24.213	21.8781	16.3973	16.3973	16.3973
Q96PZ0	PUS7	3.29975	7.00172	4	23.3994	22.2213	24.5765	16.3973	16.3973	16.3973
O43809	NUDT21	4.77273	7.00565	4	23.919	22.9245	23.3655	16.3973	16.3973	16.3973
P29218	IMPA1	3.97612	7.063	4	24.2853	22.6922	23.4034	16.3973	16.3973	16.3973
Q9UBU9	NXF1	3.86692	7.10316	4	24.1926	23.7649	22.544	16.3973	16.3973	16.3973
O75955	FLOT1	3.326	7.11451	4	22.9717	22.7006	24.8631	16.3973	16.3973	16.3973
Q9UBW8	COPS7A	4.86484	7.1303	4	23.0218	23.9789	23.5822	16.3973	16.3973	16.3973
P68402	PAFAH1B2	4.9675	7.23313	4	24.1612	23.3651	23.3651	16.3973	16.3973	16.3973
Q9UGI8	TES	3.88907	7.23529	4	23.4736	22.863	24.5612	16.3973	16.3973	16.3973
P46109	CRKL	3.39462	7.26849	4	24.2805	24.3842	22.3328	16.3973	16.3973	16.3973
Q8N8S7	ENAH	3.17551	7.27123	4	24.4799	22.1493	24.3765	16.3973	16.3973	16.3973
P19784	CSNK2A2	3.3777	7.27245	4	24.1864	24.4903	22.3327	16.3973	16.3973	16.3973
Q99848	EBNA1BP2	2.92289	7.35168	4	24.0222	25.1434	22.0814	16.3973	16.3973	16.3973
P46063	RECQL	5.12556	7.3576	4	23.6789	24.2146	23.3713	16.3973	16.3973	16.3973
P55735	SEC13	3.86832	7.36061	4	23.4853	24.748	23.0405	16.3973	16.3973	16.3973
P63279	UBE2I	2.89366	7.38539	4	25.6118	22.8682	22.8682	16.3973	16.3973	16.3973
O00505	KPNA3	4.65907	7.40333	4	23.5721	23.3885	24.4414	16.3973	16.3973	16.3973
Q07020	RPL18	2.96724	7.40846	4	27.9374	25.1128	25.6664	18.6776	18.6776	19.136
P07437	TUBB	5.01679	7.42261	4	30.453	31.0757	30.9929	23.2392	23.2392	23.7753
Q9UN37	VPS4A	4.51066	7.42784	4	23.545	23.4002	24.5303	16.3973	16.3973	16.3973
Q13564	NAE1	3.57432	7.42908	4	22.6631	24.745	24.071	16.3973	16.3973	16.3973
P61158	ACTR3	3.23792	7.42934	4	23.8966	22.4968	25.0865	16.3973	16.3973	16.3973
Q9H8Y8	GORASP2	3.63436	7.43176	4	22.6528	24.2967	24.5378	16.3973	16.3973	16.3973
Q96P70	IPO9	8.88335	7.45276	4	23.8997	23.8501	23.8005	16.3973	16.3973	16.3973
Q6IBS0	TWF2	3.76184	7.46205	4	24.963	23.3076	23.3076	16.3973	16.3973	16.3973
Q9Y2J2	EPB41L3	3.67684	7.47601	4	23.1519	23.4449	25.0231	16.3973	16.3973	16.3973
Q01085	TIAL1	3.60894	7.4949	4	24.9741	23.8255	22.8771	16.3973	16.3973	16.3973
Q9H7E9	C8orf33	5.09122	7.50288	4	23.3935	24.2205	24.0866	16.3973	16.3973	16.3973
Q9BPX3	NCAPG	6.82447	7.52044	4	24.0971	23.7761	23.8802	16.3973	16.3973	16.3973
P22087	FBL	3.04045	7.52085	4	23.0657	23.0657	25.6232	16.3973	16.3973	16.3973
Q14165	MLEC	4.58925	7.5361	4	23.6574	23.5253	24.6176	16.3973	16.3973	16.3973
P24539	ATP5PB	4.16115	7.53905	4	23.4948	23.4948	24.8194	16.3973	16.3973	16.3973
Q9Y3A5	SBDS	3.76076	7.5689	4	24.6865	24.349	22.8632	16.3973	16.3973	16.3973
O76031	CLPX	6.78107	7.59151	4	23.891	24.1846	23.891	16.3973	16.3973	16.3973
P07099	EPHX1	3.35751	7.59657	4	25.4193	23.2628	23.2995	16.3973	16.3973	16.3973
Q13492	PICALM	5.34261	7.60254	4	23.8068	23.7452	24.4476	16.3973	16.3973	16.3973
P42167	TMPO	4.20888	7.61929	4	24.8825	23.5318	23.6354	16.3973	16.3973	16.3973
P11717	IGF2R	2.32446	7.62535	4	22.3311	26.6734	23.0634	16.3973	16.3973	16.3973
Q86U42	PABPN1	4.77824	7.64935	4	23.6386	23.8392	24.6622	16.3973	16.3973	16.3973
Q96PU8	QKI	5.4258	7.66148	4	24.0173	23.7077	24.4515	16.3973	16.3973	16.3973
Q9NP79	VTA1	2.6638	7.67111	4	24.7132	24.9631	25.6878	16.3973	16.3973	19.5561
Q9NPI6	DCP1A	5.98214	7.68376	4	23.8605	23.9979	24.3848	16.3973	16.3973	16.3973
Q9BRT2	UQCC2	3.84657	7.69466	4	24.3938	24.8418	23.0404	16.3973	16.3973	16.3973
Q9HC38	GLOD4	2.98915	7.70034	4	25.6585	22.5403	24.0942	16.3973	16.3973	16.3973
P11171	EPB41	9.60747	7.70684	4	24.0846	24.1432	24.0846	16.3973	16.3973	16.3973
P21266	GSTM3	3.32939	7.7235	4	22.6685	24.63	25.064	16.3973	16.3973	16.3973
P54920	NAPA	5.42745	7.7567	4	24.4864	24.2327	23.7429	16.3973	16.3973	16.3973
Q96EY7	PTCD3	5.69662	7.75802	4	23.8059	24.4447	24.2155	16.3973	16.3973	16.3973
Q9UNS2	COPS3	3.51368	7.76336	4	22.8324	24.8448	24.8048	16.3973	16.3973	16.3973
P38606	ATP6V1A	5.67332	7.77725	4	24.0503	23.926	24.5474	16.3973	16.3973	16.3973
Q5JTV8	TOR1AIP1	8.6986	7.79776	4	24.2617	24.1637	24.1598	16.3973	16.3973	16.3973
Q16763	UBE2S	4.15914	7.805	4	23.7447	23.7447	25.1176	16.3973	16.3973	16.3973
P06730	EIF4E	3.18388	7.81179	4	22.6944	25.4769	24.4561	16.3973	16.3973	16.3973
O43396	TXNL1	4.29649	7.86073	4	24.9016	23.454	24.4186	16.3973	16.3973	16.3973
Q96CS3	FAF2	4.25697	7.86834	4	24.9261	24.4282	23.4428	16.3973	16.3973	16.3973
Q3ZCQ8	TIMM50	3.82771	7.95865	4	25.2069	23.2833	24.5777	16.3973	16.3973	16.3973
Q15006	EMC2	3.72938	8.00153	4	23.1928	24.993	25.0108	16.3973	16.3973	16.3973
P31350	RRM2	6.20573	8.04294	4	24.1515	24.5773	24.592	16.3973	16.3973	16.3973
Q9Y2B0	CNPY2	4.72228	8.04878	4	23.7764	24.6758	24.8862	16.3973	16.3973	16.3973
P43304	GPD2	6.53013	8.05165	4	24.329	24.329	24.6889	16.3973	16.3973	16.3973
Q00059	TFAM	4.96674	8.10689	4	24.9905	23.9639	24.5582	16.3973	16.3973	16.3973
Q12849	GRSF1	4.70063	8.12823	4	24.1775	24.1775	25.2216	16.3973	16.3973	16.3973
Q9BVI4	NOC4L	4.10982	8.14176	4	25.5175	23.9715	24.1283	16.3973	16.3973	16.3973
P00390	GSR	5.29741	8.15881	4	24.3594	24.2613	25.0477	16.3973	16.3973	16.3973
P46779	RPL28	3.01872	8.18673	4	25.3038	25.8548	25.3652	16.3973	19.1689	16.3973
Q96PK6	RBM14	4.24857	8.22522	4	25.2319	23.726	24.9098	16.3973	16.3973	16.3973
Q16181	SEPTIN7	4.26051	8.2319	4	25.4542	23.8841	24.5493	16.3973	16.3973	16.3973
O75832	PSMD10	5.60675	8.27792	4	24.8536	24.9153	24.2568	16.3973	16.3973	16.3973
P31689	DNAJA1	4.63261	8.27894	4	24.9217	25.1601	25.0337	16.3973	17.4841	16.3973
Q15428	SF3A2	6.50378	8.372	4	24.8701	24.9201	24.5177	16.3973	16.3973	16.3973
Q15785	TOMM34	5.19488	8.38821	4	24.3467	25.2771	24.7328	16.3973	16.3973	16.3973
P60983	GMFB	7.3431	8.41344	4	24.9673	24.7421	24.7229	16.3973	16.3973	16.3973
Q12792	TWF1	4.59693	8.42143	4	25.5132	24.1919	24.7512	16.3973	16.3973	16.3973
Q9H3K6	BOLA2	3.48248	8.44998	4	25.8427	23.4095	25.2898	16.3973	16.3973	16.3973
Q9BWF3	RBM4	3.76519	8.49603	4	23.6773	25.2359	25.7668	16.3973	16.3973	16.3973
O14828	SCAMP3	6.80015	8.5031	4	24.6843	24.9936	25.0234	16.3973	16.3973	16.3973
P25788	PSMA3	3.23754	8.5223	4	23.2257	25.5218	26.0114	16.3973	16.3973	16.3973
Q8WXF1	PSPC1	6.10559	8.56005	4	25.231	24.9735	24.6676	16.3973	16.3973	16.3973
Q14011	CIRBP	3.91181	8.60041	4	23.8333	25.5453	25.6145	16.3973	16.3973	16.3973
Q16822	PCK2	6.24969	8.62545	4	24.8673	25.3248	24.8762	16.3973	16.3973	16.3973
P35244	RPA3	4.20041	8.63536	4	25.0168	24.1846	25.8967	16.3973	16.3973	16.3973
Q13620	CUL4B	3.45871	8.64211	4	25.1985	23.6442	26.2756	16.3973	16.3973	16.3973
Q92552	MRPS27	5.95059	8.67041	4	24.8249	24.9581	25.4202	16.3973	16.3973	16.3973
O15212	PFDN6	4.37635	8.68116	4	25.5045	24.1816	25.5493	16.3973	16.3973	16.3973
P51398	DAP3	5.75874	8.68477	4	25.348	25.2121	24.6862	16.3973	16.3973	16.3973
P28072	PSMB6	2.79179	8.71494	4	23.0349	26.9978	25.3041	16.3973	16.3973	16.3973
Q9Y224	RTRAF	5.21409	8.74953	4	25.699	24.8086	24.933	16.3973	16.3973	16.3973
Q8WW12	PCNP	7.96837	8.75792	4	25.1347	25.2626	25.0685	16.3973	16.3973	16.3973
O00487	PSMD14	6.51523	8.82235	4	25.0198	25.4704	25.1688	16.3973	16.3973	16.3973
Q9Y3Y2	CHTOP	4.51622	8.84978	4	25.9638	24.5038	25.2737	16.3973	16.3973	16.3973
Q5BKZ1	ZNF326	8.03279	8.8681	4	25.2098	25.2098	25.3766	16.3973	16.3973	16.3973
P15170	GSPT1	5.52794	8.89946	4	25.2491	24.9136	25.7277	16.3973	16.3973	16.3973
P15121	AKR1B1	4.66377	8.91043	4	24.529	25.6676	25.7267	16.3973	16.3973	16.3973
P61163	ACTR1A	6.68536	8.9285	4	25.401	25.4886	25.0879	16.3973	16.3973	16.3973
Q9UBQ5	EIF3K	4.21575	8.9613	4	25.7522	25.9738	24.3499	16.3973	16.3973	16.3973
P04179	SOD2	4.38981	8.97309	4	25.5238	26.0795	24.508	16.3973	16.3973	16.3973
P61758	VBP1	5.07007	9.0266	4	25.5495	24.8316	25.8907	16.3973	16.3973	16.3973
Q9NUJ1	ABHD10	7.12308	9.09082	4	25.4878	25.3216	25.655	16.3973	16.3973	16.3973
Q13243	SRSF5	6.51217	9.19236	4	25.8054	25.6319	25.3317	16.3973	16.3973	16.3973
Q9UMS4	PRPF19	5.12058	9.22922	4	26.2156	25.1648	25.4992	16.3973	16.3973	16.3973
P09661	SNRPA1	4.57007	9.23449	4	24.7803	26.0145	26.1007	16.3973	16.3973	16.3973
P19105	MYL12A	4.37146	9.32935	4	26.6584	25.4848	25.0368	16.3973	16.3973	16.3973
E9PAV3	NACA	2.42918	9.38883	4	27.3187	27.1944	27.4795	21.0315	16.3973	16.3973
P24666	ACP1	4.3796	9.39221	4	26.5767	24.9067	25.8851	16.3973	16.3973	16.3973
Q92688	ANP32B	4.3851	9.39872	4	26.2091	24.8328	26.3462	16.3973	16.3973	16.3973
P67775	PPP2CA	5.3259	9.42651	4	26.1104	26.0996	25.2615	16.3973	16.3973	16.3973
Q13151	HNRNPA0	5.19058	9.4439	4	25.9384	25.2718	26.3134	16.3973	16.3973	16.3973
Q9Y281	CFL2	5.43868	9.48094	4	25.3484	26.133	26.1534	16.3973	16.3973	16.3973
P10606	COX5B	4.06741	9.50707	4	27.0769	25.397	25.2393	16.3973	16.3973	16.3973
Q07666	KHDRBS1	6.52755	9.52546	4	25.9136	26.1734	25.6813	16.3973	16.3973	16.3973
P47985	UQCRFS1	5.35929	9.59817	4	26.5536	25.6615	25.7714	16.3973	16.3973	16.3973
Q9NQC3	RTN4	5.77133	9.64466	4	25.7367	25.9143	26.475	16.3973	16.3973	16.3973
P63220	RPS21	4.43015	9.64614	4	25.5603	25.5603	27.0098	16.3973	16.3973	16.3973
O00303	EIF3F	5.12387	9.65963	4	26.2438	26.5005	25.4266	16.3973	16.3973	16.3973
Q9Y5L4	TIMM13	5.76653	9.66052	4	26.3664	25.6236	26.1836	16.3973	16.3973	16.3973
Q16718	NDUFA5	5.95076	9.7393	4	25.9935	25.8799	26.5365	16.3973	16.3973	16.3973
O43169	CYB5B	4.00956	9.78265	4	24.9634	26.5334	27.0431	16.3973	16.3973	16.3973
Q9P035	HACD3	6.42386	9.81174	4	26.5116	25.9962	26.1194	16.3973	16.3973	16.3973
P99999	CYCS	6.25849	9.81222	4	25.8689	26.4047	26.355	16.3973	16.3973	16.3973
P49755	TMED10	7.50275	9.81776	4	26.2969	26.3003	26.048	16.3973	16.3973	16.3973
P18621	RPL17	3.68518	9.89941	4	27.0534	27.0714	24.7654	16.3973	16.3973	16.3973
P62333	PSMC6	5.41668	9.93325	4	26.3511	25.8336	26.807	16.3973	16.3973	16.3973
P23434	GCSH	10.8973	9.95486	4	26.3372	26.3759	26.3434	16.3973	16.3973	16.3973
Q9H3N1	TMX1	8.9479	9.99299	4	26.4417	26.3185	26.4107	16.3973	16.3973	16.3973
P62318	SNRPD3	4.67476	10.0044	4	27.1115	25.6116	26.4822	16.3973	16.3973	16.3973
P62306	SNRPF	6.69546	10.013	4	26.141	26.5724	26.5178	16.3973	16.3973	16.3973
Q9H1E3	NUCKS1	10.9488	10.1572	4	26.5514	26.5764	26.5356	16.3973	16.3973	16.3973
P60953	CDC42	5.35585	10.2286	4	26.5766	26.1329	27.1682	16.3973	16.3973	16.3973
Q15056	EIF4H	5.75612	10.3357	4	26.4247	27.2069	26.5673	16.3973	16.3973	16.3973
P62263	RPS14	6.56297	10.4515	4	26.5474	26.9558	27.0431	16.3973	16.3973	16.3973
P84098	RPL19	5.63476	10.4806	4	27.3948	26.5492	26.6899	16.3973	16.3973	16.3973
P67936	TPM4	6.63087	10.5399	4	26.6858	27.1987	26.9273	16.3973	16.3973	16.3973
Q9NS69	TOMM22	7.12598	10.6773	4	26.8515	27.1565	27.2158	16.3973	16.3973	16.3973
P35637	FUS	6.05257	10.8124	4	26.8114	27.5352	27.2825	16.3973	16.3973	16.3973
P53999	SUB1	8.52555	10.868	4	27.1778	27.2626	27.3555	16.3973	16.3973	16.3973
P49006	MARCKSL1	5.95746	10.9109	4	27.4523	26.865	27.6074	16.3973	16.3973	16.3973
O75531	BANF1	8.60527	11.0633	4	27.3769	27.5495	27.4554	16.3973	16.3973	16.3973
P43487	RANBP1	8.12326	12.1632	4	28.4246	28.5853	28.6717	16.3973	16.3973	16.3973
P15531	NME1	6.3871	12.5896	4	28.6052	29.0546	29.3009	16.3973	16.3973	16.3973
O43242	PSMD3	2.40548	3.0337	5	24.1141	25.7295	24.7282	21.6344	21.6344	22.2018
P51571	SSR4	5.03925	3.6341	5	26.1151	26.3983	26.4571	22.6172	22.6172	22.8339
Q00325	SLC25A3	3.24962	4.66453	5	27.2598	27.1542	26.9993	22.0128	23.3941	22.0128
P10599	TXN	4.64268	4.75657	5	28.8935	29.107	29.0523	24.2965	24.5894	23.8971
Q93009	USP7	2.47529	4.76475	5	22.6854	20.3301	20.4707	16.3973	16.3973	16.3973
P23284	PPIB	4.55301	5.87497	5	27.7191	28.1134	27.4228	22.078	22.0498	21.5026
O95602	POLR1A	4.27707	5.94663	5	21.8714	22.1923	22.9681	16.3973	16.3973	16.3973
P62753	RPS6	3.02072	5.94694	5	28.0008	27.7046	26.5502	20.9525	22.5099	20.9525
Q7Z6Z7	HUWE1	3.10684	6.17776	5	22.8054	21.3115	23.6083	16.3973	16.3973	16.3973
Q9H583	HEATR1	3.80333	6.23491	5	23.5322	22.1823	22.1823	16.3973	16.3973	16.3973
P22392	NME2	3.19919	6.24199	5	30.5321	30.7613	30.8954	23.233	25.2821	24.9477
Q96F86	EDC3	2.99823	6.24823	5	23.5299	23.2017	21.2051	16.3973	16.3973	16.3973
Q9ULV4	CORO1C	2.98345	6.39837	5	23.8157	21.3319	23.2395	16.3973	16.3973	16.3973
P50570	DNM2	2.85753	6.46445	5	21.2618	23.3641	23.9593	16.3973	16.3973	16.3973
Q02878	RPL6	2.88142	6.46892	5	28.4887	28.6719	27.9436	21.1223	23.4528	21.1223
O75153	CLUH	3.95283	6.49382	5	22.4617	22.4617	23.75	16.3973	16.3973	16.3973
Q92922	SMARCC1	4.37288	6.55294	5	23.0865	23.4579	22.3064	16.3973	16.3973	16.3973
Q8IX12	CCAR1	2.07033	6.61302	5	20.2685	24.4276	24.3348	16.3973	16.3973	16.3973
O75152	ZC3H11A	5.48277	6.6304	5	22.7012	23.325	23.0569	16.3973	16.3973	16.3973
Q6DD88	ATL3	4.51068	6.64752	5	23.3269	22.4106	23.397	16.3973	16.3973	16.3973
Q9Y263	PLAA	4.34992	6.722	5	22.4414	23.6273	23.2893	16.3973	16.3973	16.3973
Q8NBF2	NHLRC2	3.66547	6.72656	5	24.0029	23.186	22.1828	16.3973	16.3973	16.3973
Q9UNH7	SNX6	4.70857	6.78932	5	23.0982	22.7356	23.7262	16.3973	16.3973	16.3973
Q969G3	SMARCE1	5.22084	6.84306	5	22.8735	23.2234	23.6242	16.3973	16.3973	16.3973
O60313	OPA1	4.83654	6.91272	5	23.6716	22.7736	23.4849	16.3973	16.3973	16.3973
Q13895	BYSL	3.47164	6.91759	5	24.5283	22.6988	22.7176	16.3973	16.3973	16.3973
Q9UBC2	EPS15L1	6.65852	6.91821	5	23.2296	23.2104	23.5066	16.3973	16.3973	16.3973
Q9Y5X3	SNX5	5.92985	6.93521	5	23.6245	23.1865	23.1865	16.3973	16.3973	16.3973
Q8TEM1	NUP210	3.09684	6.93557	5	21.8726	23.6976	24.4285	16.3973	16.3973	16.3973
Q02218	OGDH	2.80326	6.95149	5	21.5948	24.642	23.8097	16.3973	16.3973	16.3973
O15160	POLR1C	2.25221	6.95832	5	24.7795	24.4912	20.7962	16.3973	16.3973	16.3973
O94906	PRPF6	3.37053	6.97095	5	23.7553	24.2479	22.1016	16.3973	16.3973	16.3973
Q14677	CLINT1	3.11059	6.99836	5	21.8972	23.9179	24.372	16.3973	16.3973	16.3973
Q8IY81	FTSJ3	4.678	7.00681	5	22.8	23.765	23.6475	16.3973	16.3973	16.3973
Q8WYA6	CTNNBL1	3.07401	7.01068	5	22.0265	23.4757	24.7219	16.3973	16.3973	16.3973
Q8WTT2	NOC3L	5.79725	7.06711	5	23.6535	23.5948	23.145	16.3973	16.3973	16.3973
O95163	ELP1	5.83241	7.12288	5	23.7251	23.6274	23.208	16.3973	16.3973	16.3973
Q96C86	DCPS	5.45593	7.1703	5	23.7383	23.172	23.7925	16.3973	16.3973	16.3973
P35221	CTNNA1	2.9387	7.18606	5	22.2333	23.3189	25.1979	16.3973	16.3973	16.3973
Q15046	KARS1	3.75988	7.2253	5	24.2937	22.5656	24.0086	16.3973	16.3973	16.3973
P42765	ACAA2	3.18557	7.32717	5	22.2657	24.8329	24.0749	16.3973	16.3973	16.3973
Q9NW13	RBM28	3.84825	7.33225	5	23.2141	23.2141	24.7604	16.3973	16.3973	16.3973
Q14318	FKBP8	3.99313	7.40598	5	24.1847	24.3725	22.8527	16.3973	16.3973	16.3973
Q8IZL8	PELP1	3.78936	7.43469	5	22.7854	24.118	24.5927	16.3973	16.3973	16.3973
P45973	CBX5	3.0865	7.49064	5	24.6241	22.2392	24.8007	16.3973	16.3973	16.3973
Q13616	CUL1	4.70577	7.49706	5	24.2837	24.1398	23.2597	16.3973	16.3973	16.3973
Q14847	LASP1	3.82599	7.53202	5	22.9783	23.9748	24.8349	16.3973	16.3973	16.3973
P46379	BAG6	5.12766	7.55903	5	23.4548	24.2625	24.1518	16.3973	16.3973	16.3973
Q15366	PCBP2	4.07105	7.57121	5	28.9222	29.0473	28.8466	21.9073	20.4446	21.7504
P41227	NAA10	4.56136	7.60265	5	23.3357	24.5385	24.1257	16.3973	16.3973	16.3973
P63151	PPP2R2A	3.3223	7.65275	5	22.6062	24.9942	24.5497	16.3973	16.3973	16.3973
Q01813	PFKP	3.10583	7.68893	5	25.0669	24.7731	22.4187	16.3973	16.3973	16.3973
O75874	IDH1	4.42076	7.69181	5	23.7862	23.6231	24.8581	16.3973	16.3973	16.3973
P20290	BTF3	2.08064	7.69703	5	25.9646	24.493	26.2838	16.3973	20.8558	16.3973
Q96DI7	SNRNP40	4.10045	7.70635	5	23.3259	24.9422	24.0429	16.3973	16.3973	16.3973
Q15269	PWP2	6.01773	7.73944	5	24.4435	23.9461	24.0206	16.3973	16.3973	16.3973
Q9BVP2	GNL3	4.82445	7.7932	5	24.6531	24.3183	23.6001	16.3973	16.3973	16.3973
Q9Y6G9	DYNC1LI1	5.19998	7.8117	5	24.7038	23.8926	24.0306	16.3973	16.3973	16.3973
Q8TEX9	IPO4	6.84171	7.84949	5	24.1311	24.4411	24.1683	16.3973	16.3973	16.3973
P61106	RAB14	6.85417	7.86553	5	24.3196	24.3955	24.0734	16.3973	16.3973	16.3973
Q9Y2R9	MRPS7	6.05194	7.86783	5	24.1108	24.5739	24.1108	16.3973	16.3973	16.3973
Q9UNF1	MAGED2	4.75123	7.87902	5	24.6638	24.5402	23.625	16.3973	16.3973	16.3973
Q9BTD8	RBM42	4.17347	7.91205	5	25.1614	23.5826	24.1841	16.3973	16.3973	16.3973
P43897	TSFM	4.12526	7.92672	5	23.4588	24.4211	25.0922	16.3973	16.3973	16.3973
P52758	RIDA	5.70487	7.94179	5	24.1187	24.1805	24.7182	16.3973	16.3973	16.3973
O94979	SEC31A	7.0871	7.94791	5	24.4788	24.1849	24.372	16.3973	16.3973	16.3973
O43837	IDH3B	5.31449	7.9814	5	24.5206	24.7043	23.9113	16.3973	16.3973	16.3973
Q9H3P7	ACBD3	3.39262	7.99359	5	22.9227	25.1733	25.0767	16.3973	16.3973	16.3973
Q9NUQ9	CYRIB	6.20878	8.03385	5	24.1563	24.4941	24.6432	16.3973	16.3973	16.3973
Q9GZL7	WDR12	4.53547	8.0607	5	23.8275	24.4063	25.1402	16.3973	16.3973	16.3973
P49821	NDUFV1	4.6497	8.08136	5	23.8231	25.0487	24.5642	16.3973	16.3973	16.3973
P19404	NDUFV2	4.71992	8.09621	5	25.0374	23.86	24.5832	16.3973	16.3973	16.3973
Q9BS26	ERP44	5.15022	8.11181	5	24.0395	24.967	24.5209	16.3973	16.3973	16.3973
Q16795	NDUFA9	4.20717	8.11243	5	25.2522	24.6165	23.6606	16.3973	16.3973	16.3973
Q8TBC4	UBA3	3.93414	8.13693	5	24.705	23.5183	25.3794	16.3973	16.3973	16.3973
Q13442	PDAP1	4.48914	8.13888	5	23.9895	24.3182	25.3009	16.3973	16.3973	16.3973
Q13601	KRR1	5.44002	8.15546	5	24.5694	24.1503	24.9387	16.3973	16.3973	16.3973
P06280	GLA	4.52123	8.21274	5	23.8547	24.818	25.1575	16.3973	16.3973	16.3973
Q9P289	STK26	5.72934	8.24848	5	24.3433	25.0101	24.584	16.3973	16.3973	16.3973
Q13409	DYNC1I2	3.66676	8.25979	5	23.3655	25.3007	25.3052	16.3973	16.3973	16.3973
Q9NX58	LYAR	4.15117	8.31835	5	24.8883	23.7939	25.4648	16.3973	16.3973	16.3973
P17174	GOT1	4.39345	8.34125	5	25.5469	24.0968	24.572	16.3973	16.3973	16.3973
P61019	RAB2A	7.74149	8.38166	5	24.8682	24.6594	24.8093	16.3973	16.3973	16.3973
O75822	EIF3J	4.93308	8.40907	5	24.2415	25.3293	24.8484	16.3973	16.3973	16.3973
P62873	GNB1	3.28858	8.42591	5	25.2785	25.0852	26.302	16.3973	18.5933	16.3973
Q9UGP8	SEC63	6.41748	8.43334	5	24.8214	25.0674	24.6033	16.3973	16.3973	16.3973
Q16630	CPSF6	5.41003	8.44104	5	24.3598	25.0486	25.1066	16.3973	16.3973	16.3973
P32322	PYCR1	5.09835	8.51354	5	25.2077	24.3317	25.1932	16.3973	16.3973	16.3973
Q9UK76	JPT1	3.85738	8.62007	5	24.2035	24.6542	26.1945	16.3973	16.3973	16.3973
Q14320	FAM50A	4.69905	8.65614	5	24.7138	24.652	25.7946	16.3973	16.3973	16.3973
Q9P258	RCC2	5.16305	8.71406	5	25.5847	25.1516	24.5979	16.3973	16.3973	16.3973
O14745	NHERF1	4.76992	8.76249	5	25.0785	25.8208	24.5801	16.3973	16.3973	16.3973
O00148	DDX39A	6.32791	8.83622	5	24.9688	25.4801	25.2517	16.3973	16.3973	16.3973
O60220	TIMM8A	5.42143	8.86753	5	25.2827	24.8226	25.6892	16.3973	16.3973	16.3973
Q9UKK9	NUDT5	5.75123	8.89449	5	25.4336	25.5588	24.883	16.3973	16.3973	16.3973
Q9HAV7	GRPEL1	6.39838	8.90698	5	25.0694	25.5635	25.2801	16.3973	16.3973	16.3973
P12532	CKMT1A	5.10567	8.92274	5	25.6854	24.7203	25.5544	16.3973	16.3973	16.3973
Q9HDC9	APMAP	5.44204	8.94043	5	25.1422	25.0382	25.8329	16.3973	16.3973	16.3973
O95292	VAPB	5.39445	8.98887	5	25.6002	25.6853	24.8731	16.3973	16.3973	16.3973
P55036	PSMD4	7.64771	9.00127	5	25.397	25.2774	25.5214	16.3973	16.3973	16.3973
P11310	ACADM	4.8665	9.08822	5	24.801	25.9811	25.6745	16.3973	16.3973	16.3973
Q96I99	SUCLG2	6.36001	9.09766	5	25.7113	25.5656	25.2081	16.3973	16.3973	16.3973
O75821	EIF3G	5.7235	9.12011	5	25.8765	25.5467	25.1291	16.3973	16.3973	16.3973
Q15631	TSN	5.58382	9.12127	5	25.0678	25.6323	25.8557	16.3973	16.3973	16.3973
Q14444	CAPRIN1	5.93605	9.1619	5	25.2105	25.8736	25.5937	16.3973	16.3973	16.3973
Q9H773	DCTPP1	3.59182	9.17909	5	26.234	26.4153	24.08	16.3973	16.3973	16.3973
P08754	GNAI3	4.59058	9.25571	5	25.1437	26.4914	25.324	16.3973	16.3973	16.3973
O75439	PMPCB	4.64729	9.26006	5	25.4375	26.4496	25.0851	16.3973	16.3973	16.3973
Q15102	PAFAH1B3	5.59399	9.26643	5	25.7752	26.0067	25.2094	16.3973	16.3973	16.3973
Q9NVA2	SEPTIN11	5.68285	9.32272	5	25.4729	26.172	25.5152	16.3973	16.3973	16.3973
P46781	RPS9	2.49748	9.38176	5	27.0508	27.1179	27.5835	16.3973	16.3973	20.8124
Q13347	EIF3I	5.29379	9.38337	5	25.6831	26.3161	25.3429	16.3973	16.3973	16.3973
P51665	PSMD7	5.12053	9.40692	5	25.6109	26.4219	25.38	16.3973	16.3973	16.3973
P62266	RPS23	4.84041	9.44418	5	25.205	25.823	26.4965	16.3973	16.3973	16.3973
P09012	SNRPA	4.92101	9.46247	5	26.323	26.098	25.1584	16.3973	16.3973	16.3973
P62910	RPL32	4.64726	9.4625	5	25.1483	25.8358	26.5953	16.3973	16.3973	16.3973
P21912	SDHB	5.03546	9.5661	5	26.0912	26.4735	25.3256	16.3973	16.3973	16.3973
P31942	HNRNPH3	5.24113	9.61994	5	25.8025	25.6369	26.6123	16.3973	16.3973	16.3973
P30040	ERP29	6.81669	9.63698	5	26.1251	25.7933	26.1845	16.3973	16.3973	16.3973
Q16740	CLPP	4.67926	9.63801	5	25.4452	25.818	26.8428	16.3973	16.3973	16.3973
P54709	ATP1B3	6.21917	9.68393	5	25.7573	26.1401	26.3464	16.3973	16.3973	16.3973
P21964	COMT	6.17874	9.7113	5	25.8094	26.4224	26.0941	16.3973	16.3973	16.3973
P0DPI2	GATD3	6.25359	9.74932	5	26.1482	26.4409	25.8509	16.3973	16.3973	16.3973
Q16576	RBBP7	7.87113	9.76229	5	26.0699	26.1178	26.2911	16.3973	16.3973	16.3973
O76003	GLRX3	7.7276	9.77478	5	26.3056	26.0539	26.1567	16.3973	16.3973	16.3973
P22061	PCMT1	4.43526	9.80515	5	25.8324	25.6022	27.1727	16.3973	16.3973	16.3973
Q9BX68	HINT2	7.37529	9.81936	5	26.1475	26.395	26.1075	16.3973	16.3973	16.3973
Q96FW1	OTUB1	6.0236	9.84302	5	26.3844	25.852	26.4846	16.3973	16.3973	16.3973
O75347	TBCA	8.97863	9.92893	5	26.3591	26.2541	26.3655	16.3973	16.3973	16.3973
Q15369	ELOC	6.24575	9.94493	5	26.0119	26.4099	26.605	16.3973	16.3973	16.3973
P39748	FEN1	5.21988	10.059	5	26.1023	26.1736	27.0929	16.3973	16.3973	16.3973
P04792	HSPB1	5.82288	10.0642	5	26.3028	26.1755	26.9062	16.3973	16.3973	16.3973
P62316	SNRPD2	4.60081	10.1384	5	26.6928	25.6722	27.2422	16.3973	16.3973	16.3973
P28070	PSMB4	7.19681	10.3525	5	26.9195	26.7724	26.5577	16.3973	16.3973	16.3973
Q15758	SLC1A5	6.52576	10.4071	5	26.9068	26.4991	27.0074	16.3973	16.3973	16.3973
P09972	ALDOC	6.19921	10.4604	5	26.7008	26.6392	27.2332	16.3973	16.3973	16.3973
O75947	ATP5PD	6.39921	10.6745	5	27.2715	27.2135	26.7305	16.3973	16.3973	16.3973
P62081	RPS7	4.79547	10.6999	5	27.3593	26.2501	27.6821	16.3973	16.3973	16.3973
P50914	RPL14	5.6041	10.9457	5	27.4039	26.8339	27.7914	16.3973	16.3973	16.3973
Q09028	RBBP4	7.85886	11.0757	5	27.6151	27.4525	27.3516	16.3973	16.3973	16.3973
P52815	MRPL12	8.32906	11.1109	5	27.5542	27.5789	27.3916	16.3973	16.3973	16.3973
P32969	RPL9	10.495	11.222	5	27.6372	27.5852	27.6355	16.3973	16.3973	16.3973
Q01105	SET	7.13987	12.7163	5	29.1974	28.8524	29.2909	16.3973	16.3973	16.3973
P00918	CA2	3.57174	2.33765	6	28.498	27.8561	28.0624	25.7616	25.8803	25.7616
O95757	HSPA4L	2.15344	3.54438	6	24.6865	25.159	22.8767	20.6675	20.6675	20.7539
Q04917	YWHAH	2.21983	3.60503	6	25.0361	26.958	26.7471	22.6032	22.1435	23.1794
P20618	PSMB1	4.64371	4.99167	6	27.1413	27.0616	26.5238	21.8114	22.1288	21.8114
P60660	MYL6	4.83099	5.00272	6	27.186	26.6155	27.2153	21.9662	22.0762	21.9662
P62249	RPS16	5.80104	5.26357	6	28.7518	28.9039	28.854	23.4624	23.7943	23.4624
P36542	ATP5F1C	2.49859	5.29128	6	27.5777	27.7643	27.5568	21.5095	21.5095	24.0061
Q9UQ35	SRRM2	2.45367	5.41987	6	20.6886	21.6031	23.62	16.3973	16.3973	16.8575
P15924	DSP	4.88196	5.69034	6	21.66	22.2168	22.3862	16.3973	16.3973	16.3973
P35658	NUP214	4.58396	6.18863	6	22.2333	23.1468	22.3777	16.3973	16.3973	16.3973
P62277	RPS13	4.55319	6.22795	6	28.6019	28.7215	28.3882	22.0647	22.8898	22.0732
Q99459	CDC5L	3.24051	6.55722	6	24.2731	22.2618	22.3288	16.3973	16.3973	16.3973
Q8WUM0	NUP133	2.99285	6.58513	6	22.1636	22.2663	24.5175	16.3973	16.3973	16.3973
Q7Z5L9	IRF2BP2	3.85713	6.64979	6	22.3305	22.892	23.9189	16.3973	16.3973	16.3973
Q13685	AAMP	3.12272	6.65108	6	22.2112	22.4574	24.4767	16.3973	16.3973	16.3973
Q9Y450	HBS1L	3.15588	6.81282	6	21.9557	23.2225	24.4522	16.3973	16.3973	16.3973
Q13451	FKBP5	3.16355	6.88464	6	22.557	22.557	24.7319	16.3973	16.3973	16.3973
P52948	NUP98	2.52151	6.91345	6	25.0191	21.3253	23.5879	16.3973	16.3973	16.3973
P30419	NMT1	4.65474	6.95291	6	23.3799	22.8065	23.8643	16.3973	16.3973	16.3973
P56182	RRP1	3.33236	6.99368	6	22.0628	24.1438	23.9665	16.3973	16.3973	16.3973
P05783	KRT18	2.01996	7.01136	6	24.612	24.7959	25.2861	16.3973	16.3973	20.8652
O95747	OXSR1	4.71251	7.09997	6	23.7842	23.814	22.8937	16.3973	16.3973	16.3973
Q14C86	GAPVD1	4.8051	7.21683	6	23.7153	23.0674	24.0597	16.3973	16.3973	16.3973
P63010	AP2B1	3.73075	7.23504	6	23.6156	24.5843	22.6972	16.3973	16.3973	16.3973
Q9NYU2	UGGT1	4.39144	7.35742	6	24.0955	23.0021	24.1666	16.3973	16.3973	16.3973
Q86XP3	DDX42	3.29524	7.36389	6	24.3088	22.3397	24.6351	16.3973	16.3973	16.3973
P48147	PREP	3.18484	7.43426	6	24.7047	22.2902	24.4999	16.3973	16.3973	16.3973
P80303	NUCB2	3.50172	7.45582	6	24.2431	22.5979	24.7184	16.3973	16.3973	16.3973
Q14126	DSG2	3.77408	7.51732	6	22.9913	24.9001	23.8525	16.3973	16.3973	16.3973
P09211	GSTP1	5.80245	7.58935	6	29.8816	30.0545	29.9749	22.3777	22.6676	22.0976
Q13867	BLMH	2.88203	7.61793	6	22.5587	23.6869	25.8001	16.3973	16.3973	16.3973
Q9Y3B7	MRPL11	4.98874	7.71251	6	23.5782	24.2259	24.5254	16.3973	16.3973	16.3973
O43865	AHCYL1	2.91952	7.74542	6	22.3044	24.6874	25.4364	16.3973	16.3973	16.3973
O00116	AGPS	5.10603	7.83131	6	23.7442	24.2838	24.658	16.3973	16.3973	16.3973
Q9BUJ2	HNRNPUL1	5.2376	7.83312	6	24.4351	24.5153	23.7409	16.3973	16.3973	16.3973
P08621	SNRNP70	2.65838	7.8429	6	25.7653	23.8305	25.8457	16.3973	19.1182	16.3973
Q9UNE7	STUB1	3.8959	7.91615	6	24.1941	23.4415	25.3048	16.3973	16.3973	16.3973
Q9Y295	DRG1	4.70452	7.94101	6	24.0261	23.9727	25.0161	16.3973	16.3973	16.3973
Q9Y3T9	NOC2L	6.08849	7.95049	6	24.6533	24.195	24.195	16.3973	16.3973	16.3973
Q96AY3	FKBP10	5.03803	8.02375	6	24.0957	24.1834	24.9841	16.3973	16.3973	16.3973
Q13242	SRSF9	4.1083	8.17794	6	25.3101	24.7796	23.6361	16.3973	16.3973	16.3973
Q9NTZ6	RBM12	4.46061	8.24608	6	24.6075	25.3635	23.9592	16.3973	16.3973	16.3973
O15067	PFAS	6.02071	8.28158	6	24.6547	24.9768	24.4052	16.3973	16.3973	16.3973
P20700	LMNB1	4.04894	8.29404	6	23.7585	25.5502	24.7654	16.3973	16.3973	16.3973
P30837	ALDH1B1	3.95744	8.32246	6	23.8183	25.713	24.628	16.3973	16.3973	16.3973
P54578	USP14	4.79931	8.33416	6	24.0812	25.2102	24.9031	16.3973	16.3973	16.3973
P11387	TOP1	4.1294	8.38589	6	23.8098	25.4704	25.0694	16.3973	16.3973	16.3973
Q9HCC0	MCCC2	8.08618	8.3915	6	24.754	24.8893	24.7231	16.3973	16.3973	16.3973
P61224	RAP1B	2.44534	8.44332	6	26.5922	25.8397	26.1694	16.3973	16.3973	20.4767
P51858	HDGF	4.2701	8.4458	6	24.499	24.2684	25.762	16.3973	16.3973	16.3973
Q9BT78	COPS4	4.7821	8.48322	6	25.0757	25.3588	24.2071	16.3973	16.3973	16.3973
O43684	BUB3	3.83334	8.5158	6	25.0958	25.1519	26.0487	17.9544	16.3973	16.3973
Q99497	PARK7	7.66859	8.55731	6	28.3104	28.1683	28.3657	19.7138	19.6775	19.7812
O43583	DENR	6.73585	8.57265	6	24.7756	24.9658	25.1685	16.3973	16.3973	16.3973
P15374	UCHL3	5.58339	8.60511	6	25.3555	24.5949	25.0569	16.3973	16.3973	16.3973
P14868	DARS1	5.92461	8.63245	6	25.2677	24.6716	25.15	16.3973	16.3973	16.3973
P56192	MARS1	4.02594	8.63381	6	24.0973	25.9919	25.0041	16.3973	16.3973	16.3973
P23588	EIF4B	4.41677	8.64194	6	25.273	24.1944	25.6504	16.3973	16.3973	16.3973
Q9H910	JPT2	5.4744	8.64553	6	24.6394	25.0301	25.4591	16.3973	16.3973	16.3973
Q15717	ELAVL1	3.86966	8.64666	6	26.0286	24.7981	25.7234	16.3973	16.3973	17.8155
O76021	RSL1D1	6.54679	8.6557	6	25.2389	24.8084	25.1118	16.3973	16.3973	16.3973
Q9UJS0	SLC25A13	6.7323	8.68373	6	25.1573	24.8548	25.2311	16.3973	16.3973	16.3973
P50454	SERPINH1	4.5033	8.68775	6	25.2099	24.3084	25.7369	16.3973	16.3973	16.3973
P62633	CNBP	2.25843	8.70509	6	26.2491	26.9434	26.8634	16.3973	21.1459	16.3973
Q9H4A4	RNPEP	5.17939	8.72244	6	25.1231	25.6085	24.6277	16.3973	16.3973	16.3973
Q99613	EIF3C	4.58775	8.73962	6	25.1595	25.8173	24.434	16.3973	16.3973	16.3973
O43765	SGTA	4.44323	8.74174	6	24.3855	25.1409	25.8908	16.3973	16.3973	16.3973
O75489	NDUFS3	3.97242	8.7796	6	26.0744	25.3481	24.1083	16.3973	16.3973	16.3973
P40429	RPL13A	2.20964	8.79056	6	26.7768	27.6373	25.917	16.3973	21.1648	16.3973
P50995	ANXA11	5.91381	8.79215	6	24.8227	25.3108	25.4348	16.3973	16.3973	16.3973
Q96A33	CCDC47	6.52806	8.84888	6	25.4689	25.2576	25.0121	16.3973	16.3973	16.3973
P22307	SCP2	5.67894	8.87226	6	25.1049	25.6975	25.0063	16.3973	16.3973	16.3973
Q14498	RBM39	5.40095	8.92969	6	24.8532	25.4002	25.7276	16.3973	16.3973	16.3973
P52597	HNRNPF	2.04577	8.96847	6	26.6172	27.373	27.695	16.3973	16.3973	21.9852
O75367	MACROH2A1	6.47797	8.9729	6	25.1041	25.5649	25.4416	16.3973	16.3973	16.3973
Q9BQA1	WDR77	7.14914	9.01432	6	25.5714	25.2459	25.4176	16.3973	16.3973	16.3973
Q7Z4W1	DCXR	6.16956	9.05738	6	25.5964	25.1237	25.6441	16.3973	16.3973	16.3973
Q9NR45	NANS	6.71524	9.0805	6	25.5304	25.2459	25.6571	16.3973	16.3973	16.3973
Q9BWD1	ACAT2	5.76101	9.0839	6	25.115	25.4835	25.8452	16.3973	16.3973	16.3973
Q7L1Q6	BZW1	5.65585	9.10056	6	25.14	25.4423	25.9114	16.3973	16.3973	16.3973
Q9Y6C9	MTCH2	4.06351	9.14228	6	24.4228	25.9301	26.2659	16.3973	16.3973	16.3973
Q14978	NOLC1	2.94034	9.17472	6	26.7782	26.0755	27.058	16.3973	16.3973	19.5929
Q00796	SORD	5.52029	9.20219	6	25.9775	25.6815	25.1395	16.3973	16.3973	16.3973
P49257	LMAN1	7.33721	9.21319	6	25.4766	25.7716	25.5834	16.3973	16.3973	16.3973
Q15293	RCN1	5.7707	9.22223	6	25.3586	25.4588	26.0412	16.3973	16.3973	16.3973
Q99471	PFDN5	5.81274	9.22405	6	25.3767	25.4529	26.0346	16.3973	16.3973	16.3973
O94905	ERLIN2	7.10788	9.24604	6	25.7971	25.4591	25.6738	16.3973	16.3973	16.3973
O75396	SEC22B	5.65565	9.26083	6	25.664	26.0507	25.2597	16.3973	16.3973	16.3973
P27635	RPL10	2.35641	9.2699	6	27.057	26.9673	27.7208	16.3973	16.3973	21.1408
Q99733	NAP1L4	4.8297	9.29747	6	25.0765	25.6536	26.3543	16.3973	16.3973	16.3973
Q10567	AP1B1	5.00911	9.36015	6	25.4811	26.4247	25.3666	16.3973	16.3973	16.3973
Q96C36	PYCR2	8.23521	9.44941	6	25.9001	25.8988	25.7413	16.3973	16.3973	16.3973
P20042	EIF2S2	7.27354	9.45597	6	25.8135	26.0284	25.7179	16.3973	16.3973	16.3973
Q9NTK5	OLA1	4.87313	9.48733	6	25.2314	25.919	26.5035	16.3973	16.3973	16.3973
P46783	RPS10	2.7648	9.54406	6	27.0834	27.3066	27.2628	16.3973	20.226	16.3973
P26373	RPL13	2.94493	9.56937	6	26.7387	27.5893	26.931	19.7562	16.3973	16.3973
P67870	CSNK2B	5.19609	9.6754	6	25.4588	26.2927	26.4668	16.3973	16.3973	16.3973
Q9BQ67	GRWD1	7.40441	9.73126	6	26.1247	25.9788	26.2823	16.3973	16.3973	16.3973
Q96AG4	LRRC59	7.33366	9.73972	6	26.0457	26.0457	26.3197	16.3973	16.3973	16.3973
P61081	UBE2M	5.7007	9.78675	6	25.7208	26.4858	26.3456	16.3973	16.3973	16.3973
Q13283	G3BP1	5.8716	9.90171	6	25.8985	26.6376	26.361	16.3973	16.3973	16.3973
P54727	RAD23B	5.41978	10.0084	6	25.8436	26.6334	26.7403	16.3973	16.3973	16.3973
P00491	PNP	7.47372	10.0139	6	26.2399	26.4744	26.5194	16.3973	16.3973	16.3973
Q01469	FABP5	5.68261	10.0344	6	26.8344	26.4681	25.9928	16.3973	16.3973	16.3973
Q9UBQ7	GRHPR	7.07453	10.0413	6	26.626	26.2474	26.4424	16.3973	16.3973	16.3973
Q13011	ECH1	5.09584	10.048	6	26.191	26.022	27.123	16.3973	16.3973	16.3973
P27695	APEX1	7.01227	10.0736	6	26.2464	26.5523	26.6141	16.3973	16.3973	16.3973
P35613	BSG	5.42705	10.1184	6	26.9229	25.9674	26.6569	16.3973	16.3973	16.3973
P62280	RPS11	7.99106	10.2995	6	26.7292	26.5695	26.7917	16.3973	16.3973	16.3973
P10515	DLAT	8.4184	10.3336	6	26.7208	26.8254	26.6465	16.3973	16.3973	16.3973
P30048	PRDX3	2.66475	10.3548	6	28.366	27.8439	28.4336	16.3973	16.3973	20.7844
Q86V81	ALYREF	4.77558	10.3702	6	25.9217	27.1143	27.2666	16.3973	16.3973	16.3973
Q99436	PSMB7	8.65664	10.5029	6	26.8129	26.9688	26.9189	16.3973	16.3973	16.3973
P60891	PRPS1	5.60494	10.673	6	27.3754	27.3056	26.5298	16.3973	16.3973	16.3973
P25789	PSMA4	6.17201	10.7151	6	27.4397	26.7613	27.1364	16.3973	16.3973	16.3973
P25787	PSMA2	6.74631	10.7762	6	27.4485	27.0958	26.9763	16.3973	16.3973	16.3973
P62829	RPL23	6.96836	11.0095	6	27.4825	27.1582	27.5796	16.3973	16.3973	16.3973
O14818	PSMA7	6.92223	11.4885	6	27.8215	28.1479	27.6882	16.3973	16.3973	16.3973
P09936	UCHL1	5.82101	11.5374	6	27.9826	27.4647	28.3568	16.3973	16.3973	16.3973
P62888	RPL30	6.26164	11.6626	6	27.8178	27.8993	28.4628	16.3973	16.3973	16.3973
P31946	YWHAB	5.95171	12.1667	6	28.8801	28.0639	28.748	16.3973	16.3973	16.3973
P24534	EEF1B2	8.2645	12.2639	6	28.7885	28.5596	28.6357	16.3973	16.3973	16.3973
P30086	PEBP1	3.86452	2.5728	7	28.7564	28.8413	29.1391	26.3952	26.0802	26.543
Q15008	PSMD6	3.13344	3.34349	7	25.2251	25.2869	24.1825	21.5437	21.5437	21.5765
Q15417	CNN3	2.60608	3.47176	7	24.986	24.8322	26.4382	21.9184	21.9184	22.0045
O60884	DNAJA2	2.88592	4.08268	7	25.0447	25.5615	25.3454	20.7492	22.2052	20.7492
P62913	RPL11	3.07631	5.42406	7	28.3566	28.3677	28.5375	22.7186	24.1445	22.1265
P62826	RAN	2.69522	5.46573	7	29.3636	29.2268	29.3835	23.5982	25.2898	22.6886
P23528	CFL1	3.73069	6.00346	7	30.362	30.4117	30.33	23.702	25.2271	24.1642
O00273	DFFA	4.81129	6.2014	7	25.7952	26.0826	25.6837	19.4335	20.0902	19.4335
O14979	HNRNPDL	5.4403	6.75826	7	28.3819	28.0186	27.8354	21.2213	21.5186	21.2213
Q29RF7	PDS5A	6.01784	6.90131	7	23.5254	23.0487	23.3218	16.3973	16.3973	16.3973
P11216	PYGB	3.01192	7.23217	7	22.0109	24.0902	24.7874	16.3973	16.3973	16.3973
Q9UHD1	CHORDC1	3.10005	7.24821	7	22.0785	24.638	24.2202	16.3973	16.3973	16.3973
Q09666	AHNAK	2.52133	7.2987	7	25.4008	21.5447	24.1426	16.3973	16.3973	16.3973
Q92667	AKAP1	4.65404	7.50406	7	23.5849	23.5579	24.5614	16.3973	16.3973	16.3973
P08708	RPS17	5.24575	7.66112	7	28.2548	28.8572	28.8855	20.8823	21.2494	20.8823
P61011	SRP54	2.8867	7.67308	7	24.6424	25.3611	22.2077	16.3973	16.3973	16.3973
Q9BY77	POLDIP3	3.78703	7.75024	7	23.0751	24.3771	24.9905	16.3973	16.3973	16.3973
O76094	SRP72	4.72444	7.76333	7	23.5266	24.6224	24.3329	16.3973	16.3973	16.3973
P00387	CYB5R3	6.25208	7.78181	7	27.3071	27.113	26.8546	19.3828	19.2732	19.2732
O95861	BPNT1	4.71007	7.99715	7	24.0345	24.0737	25.0752	16.3973	16.3973	16.3973
Q96J01	THOC3	4.99139	8.01	7	24.5711	24.8071	23.8438	16.3973	16.3973	16.3973
Q9BZE4	GTPBP4	6.07296	8.30006	7	25.019	24.5265	24.5466	16.3973	16.3973	16.3973
O60763	USO1	5.38107	8.51305	7	24.8453	24.5206	25.3652	16.3973	16.3973	16.3973
Q99567	NUP88	5.94348	8.52876	7	24.6601	25.2644	24.8538	16.3973	16.3973	16.3973
P13861	PRKAR2A	5.05206	8.54456	7	25.1267	25.3412	24.3578	16.3973	16.3973	16.3973
P02786	TFRC	7.74625	8.55351	7	25.075	24.8678	24.9097	16.3973	16.3973	16.3973
O60832	DKC1	7.62342	8.55595	7	25.0296	24.8178	25.0124	16.3973	16.3973	16.3973
P23193	TCEA1	4.36824	8.59314	7	24.2635	24.9058	25.8021	16.3973	16.3973	16.3973
Q96A49	SYAP1	5.26594	8.60573	7	25.0918	25.4125	24.5049	16.3973	16.3973	16.3973
P12814	ACTN1	5.54091	8.62503	7	25.4767	24.7866	24.8038	16.3973	16.3973	16.3973
O43399	TPD52L2	6.30336	8.62636	7	24.7312	25.1836	25.1563	16.3973	16.3973	16.3973
Q92973	TNPO1	3.92198	8.6735	7	24.8428	24.9405	26.3683	16.3973	16.3973	17.3365
P35520	CBS	4.40551	8.69817	7	25.9337	24.9194	24.4334	16.3973	16.3973	16.3973
Q15019	SEPTIN2	4.01875	8.81295	7	24.2909	26.2264	25.1135	16.3973	16.3973	16.3973
P63208	SKP1	5.29048	9.00713	7	25.4184	24.9227	25.8723	16.3973	16.3973	16.3973
P31150	GDI1	5.1654	9.04732	7	25.2464	25.0605	26.027	16.3973	16.3973	16.3973
P11766	ADH5	4.20794	9.13514	7	25.8412	26.2393	24.5169	16.3973	16.3973	16.3973
Q15637	SF1	5.37412	9.18823	7	25.0545	25.8913	25.8109	16.3973	16.3973	16.3973
P36776	LONP1	5.7486	9.30257	7	25.8424	25.2728	25.9844	16.3973	16.3973	16.3973
O43615	TIMM44	4.75195	9.32434	7	25.1936	26.4771	25.4943	16.3973	16.3973	16.3973
Q08945	SSRP1	5.8229	9.5262	7	26.0879	25.5004	26.1823	16.3973	16.3973	16.3973
Q99986	VRK1	5.63007	9.54919	7	26.3934	25.87	25.5762	16.3973	16.3973	16.3973
Q9UKY7	CDV3	5.80713	9.61838	7	25.996	25.6495	26.4016	16.3973	16.3973	16.3973
P07954	FH	5.35481	9.6303	7	26.145	25.4903	26.4475	16.3973	16.3973	16.3973
P41250	GARS1	5.42804	9.65342	7	25.5085	26.2982	26.3455	16.3973	16.3973	16.3973
P23381	WARS1	6.95148	9.67303	7	26.2062	25.8459	26.1589	16.3973	16.3973	16.3973
P30520	ADSS2	6.3854	9.74147	7	25.999	26.4536	25.9638	16.3973	16.3973	16.3973
O43776	NARS1	5.49002	9.74503	7	25.7348	26.0543	26.638	16.3973	16.3973	16.3973
P52565	ARHGDIA	3.04188	9.87533	7	27.4619	27.6062	27.0706	16.3973	19.7181	16.3973
O95336	PGLS	4.54725	9.94454	7	25.4191	26.9089	26.6976	16.3973	16.3973	16.3973
P05198	EIF2S1	7.17522	10.0637	7	26.3564	26.3588	26.6678	16.3973	16.3973	16.3973
O14737	PDCD5	6.63717	10.0783	7	26.5664	26.1988	26.6618	16.3973	16.3973	16.3973
P61289	PSME3	5.19457	10.2334	7	25.9728	26.984	26.9355	16.3973	16.3973	16.3973
Q9HB71	CACYBP	6.32698	10.5048	7	27.253	26.7492	26.7041	16.3973	16.3973	16.3973
Q9H9B4	SFXN1	6.64857	10.5106	7	26.6154	27.0524	27.0559	16.3973	16.3973	16.3973
P16949	STMN1	4.99903	10.6131	7	26.3142	27.0846	27.6325	16.3973	16.3973	16.3973
Q9UHX1	PUF60	7.57175	10.6142	7	26.8556	27.0235	27.1555	16.3973	16.3973	16.3973
P61313	RPL15	5.1092	10.6167	7	27.0938	27.5919	26.3563	16.3973	16.3973	16.3973
Q14103	HNRNPD	2.6682	10.7507	7	28.456	28.7792	28.7792	16.3973	20.9678	16.3973
Q04837	SSBP1	5.02739	10.7672	7	26.5617	27.0605	27.8713	16.3973	16.3973	16.3973
P68036	UBE2L3	6.85234	11.0654	7	27.5399	27.6516	27.1966	16.3973	16.3973	16.3973
P30044	PRDX5	5.66687	11.1368	7	27.0068	27.9194	27.6762	16.3973	16.3973	16.3973
P62241	RPS8	8.14735	11.3053	7	27.5727	27.7443	27.791	16.3973	16.3973	16.3973
P61981	YWHAG	6.49732	11.3053	7	27.7959	27.9421	27.3699	16.3973	16.3973	16.3973
P48047	ATP5PO	6.23847	11.323	7	27.3342	28.0009	27.8258	16.3973	16.3973	16.3973
P25398	RPS12	7.80707	11.6545	7	28.217	27.9517	27.9867	16.3973	16.3973	16.3973
P06744	GPI	6.34056	11.8815	7	28.4733	27.884	28.4791	16.3973	16.3973	16.3973
P30050	RPL12	7.26941	12.0073	7	28.2106	28.6144	28.3888	16.3973	16.3973	16.3973
P0DP25	CALM3	8.86296	13.0378	7	29.508	29.3376	29.4597	16.3973	16.3973	16.3973
Q8WUH6	TMEM263	6.50998	13.0808	7	29.6121	29.7322	29.09	16.3973	16.3973	16.3973
Q07021	C1QBP	8.69184	13.6864	7	29.9724	30.1718	30.1071	16.3973	16.3973	16.3973
P31040	SDHA	3.13457	2.62377	8	27.1786	27.8308	27.7085	24.6189	24.9261	25.3015
P32119	PRDX2	3.99674	3.4128	8	29.3105	29.6302	29.8481	26.042	26.0154	26.493
P20020	ATP2B1	3.181	3.68444	8	24.3564	24.5163	25.5015	20.9683	20.9683	21.3844
P52209	PGD	3.25787	4.53844	8	25.2516	26.6276	26.1369	21.2619	21.8769	21.2619
P62701	RPS4X	4.50049	5.19266	8	28.2674	28.4117	27.9585	22.6134	23.3206	23.1256
P63241	EIF5A	2.74842	5.36109	8	28.6023	26.6002	28.7835	22.4198	22.4679	23.015
P29966	MARCKS	2.75983	6.42036	8	27.5225	28.3777	27.9695	22.6641	22.0182	19.9263
Q13423	NNT	3.24972	7.31003	8	22.2785	24.6917	24.1519	16.3973	16.3973	16.3973
Q9BVJ6	UTP14A	5.41356	7.62896	8	23.6965	23.9487	24.4337	16.3973	16.3973	16.3973
P78527	PRKDC	3.83977	7.82502	8	24.3497	23.2075	25.1098	16.3973	16.3973	16.3973
P35580	MYH10	4.25576	7.86294	8	24.8256	23.403	24.5522	16.3973	16.3973	16.3973
Q9C0C9	UBE2O	5.75566	7.87422	8	24.6263	24.0143	24.174	16.3973	16.3973	16.3973
P14735	IDE	4.68616	8.06701	8	25.0551	23.8492	24.4887	16.3973	16.3973	16.3973
Q13838	DDX39B	5.91297	8.15661	8	29.3317	29.7023	29.7453	21.3232	21.3232	21.663
Q9BSJ8	ESYT1	3.83781	8.24933	8	23.5858	25.598	24.7561	16.3973	16.3973	16.3973
Q6P2Q9	PRPF8	5.79355	8.31345	8	24.7534	25.0153	24.3636	16.3973	16.3973	16.3973
Q9Y678	COPG1	6.07932	8.54105	8	25.1971	24.9864	24.6317	16.3973	16.3973	16.3973
O75083	WDR1	6.47373	8.56816	8	24.8805	25.2242	24.7918	16.3973	16.3973	16.3973
Q7L0Y3	TRMT10C	6.51651	8.60036	8	25.2338	24.9702	24.789	16.3973	16.3973	16.3973
Q9UNZ2	NSFL1C	4.14537	8.60265	8	25.5721	25.442	23.9858	16.3973	16.3973	16.3973
P45974	USP5	5.4153	8.60913	8	24.6611	25.4774	24.8809	16.3973	16.3973	16.3973
P35606	COPB2	4.48123	8.62268	8	24.239	25.1461	25.6749	16.3973	16.3973	16.3973
Q96QK1	VPS35	6.35407	8.69154	8	25.1181	24.8274	25.3212	16.3973	16.3973	16.3973
P07197	NEFM	5.4646	8.69238	8	24.7192	25.5374	25.0126	16.3973	16.3973	16.3973
Q99615	DNAJC7	5.20419	8.70644	8	24.6428	25.6054	25.0632	16.3973	16.3973	16.3973
P25786	PSMA1	2.4625	8.78585	8	26.7768	26.3464	26.6619	20.6329	16.3973	16.3973
O95347	SMC2	6.20741	8.82213	8	25.4736	25.2558	24.929	16.3973	16.3973	16.3973
O95218	ZRANB2	4.57758	8.85738	8	24.5394	25.9499	25.2748	16.3973	16.3973	16.3973
P35659	DEK	4.2524	8.90336	8	24.8166	26.2895	24.7959	16.3973	16.3973	16.3973
Q14157	UBAP2L	5.454	8.94892	8	25.2389	24.9807	25.8191	16.3973	16.3973	16.3973
Q96AE4	FUBP1	2.55719	8.99342	8	26.1334	27.449	26.524	16.3973	16.3973	20.3315
Q6P2E9	EDC4	5.3627	9.06756	8	25.9911	25.1501	25.2535	16.3973	16.3973	16.3973
O43852	CALU	4.70583	9.10125	8	24.7734	25.6193	26.103	16.3973	16.3973	16.3973
P12081	HARS1	5.32475	9.11752	8	25.9409	25.0085	25.5952	16.3973	16.3973	16.3973
Q8N163	CCAR2	7.15646	9.12088	8	25.3295	25.6272	25.5979	16.3973	16.3973	16.3973
P41091	EIF2S3	4.00044	9.17286	8	24.4118	25.9548	26.3439	16.3973	16.3973	16.3973
P23921	RRM1	7.53078	9.18546	8	25.5059	25.5059	25.7366	16.3973	16.3973	16.3973
Q9UBE0	SAE1	7.40536	9.19051	8	25.6289	25.7061	25.4285	16.3973	16.3973	16.3973
P15311	EZR	6.68635	9.29718	8	25.7288	25.4601	25.8946	16.3973	16.3973	16.3973
Q9UNM6	PSMD13	6.67115	9.31967	8	25.4736	25.9074	25.7699	16.3973	16.3973	16.3973
Q9BXJ9	NAA15	5.48389	9.382	8	25.4588	25.595	26.2842	16.3973	16.3973	16.3973
Q96RP9	GFM1	5.02849	9.41	8	25.1408	26.1486	26.1326	16.3973	16.3973	16.3973
P39656	DDOST	10.7481	9.44795	8	25.8283	25.8695	25.838	16.3973	16.3973	16.3973
Q7L2H7	EIF3M	5.70255	9.46928	8	26.0967	25.4121	26.091	16.3973	16.3973	16.3973
Q99536	VAT1	5.34108	9.59225	8	25.4378	26.1517	26.3793	16.3973	16.3973	16.3973
P68400	CSNK2A1	4.28322	9.61725	8	26.0709	25.079	26.8938	16.3973	16.3973	16.3973
Q07955	SRSF1	2.32521	9.66143	8	27.7744	27.5775	27.915	16.3973	16.3973	21.488
Q12874	SF3A3	5.83784	9.95531	8	26.0414	26.7801	26.2365	16.3973	16.3973	16.3973
Q01518	CAP1	8.15784	9.95958	8	26.4108	26.4191	26.2408	16.3973	16.3973	16.3973
P50502	ST13	2.27379	10.0076	8	28.0105	28.0976	28.5418	16.3973	16.3973	21.8324
O14744	PRMT5	4.88725	10.3135	8	25.9296	26.9846	27.2184	16.3973	16.3973	16.3973
Q16543	CDC37	6.04345	10.4292	8	26.5774	26.6676	27.2345	16.3973	16.3973	16.3973
P29373	CRABP2	4.83743	10.4852	8	27.7083	26.4013	26.538	16.3973	16.3973	16.3973
Q8NBS9	TXNDC5	6.90816	10.622	8	26.8045	27.245	27.0084	16.3973	16.3973	16.3973
Q9BTT0	ANP32E	7.80275	10.9409	8	27.1832	27.3966	27.435	16.3973	16.3973	16.3973
O96008	TOMM40	11.0908	10.9602	8	27.3671	27.3341	27.3715	16.3973	16.3973	16.3973
Q9UJZ1	STOML2	6.33671	11.2559	8	27.782	27.2839	27.8937	16.3973	16.3973	16.3973
P62424	RPL7A	5.89635	11.2635	8	27.5724	28.1167	27.2933	16.3973	16.3973	16.3973
P51149	RAB7A	6.74637	11.3865	8	28.0466	27.7768	27.528	16.3973	16.3973	16.3973
P67809	YBX1	6.97803	12.2968	8	28.4594	28.6746	28.9485	16.3973	16.3973	16.3973
P06454	PTMA	6.13685	13.3638	8	29.2651	29.9591	30.0593	16.3973	16.3973	16.3973
P61604	HSPE1	8.19101	13.9459	8	30.2097	30.4858	30.3342	16.3973	16.3973	16.3973
P05387	RPLP2	8.5373	13.9591	8	30.2368	30.4624	30.3701	16.3973	16.3973	16.3973
P55265	ADAR	3.06209	3.41294	9	24.189	24.8779	25.5082	21.4192	21.4192	21.4979
Q9BXP5	SRRT	2.95186	4.22357	9	25.746	24.7085	26.3791	21.254	21.254	21.6549
P55209	NAP1L1	2.87496	5.25063	9	29.1618	29.4193	29.2741	22.7667	24.9427	24.3938
P49189	ALDH9A1	3.65376	5.27285	9	26.5619	26.6596	26.8592	21.0146	22.233	21.0146
P31930	UQCRC1	2.39714	5.48594	9	27.0738	26.8504	27.6091	22.7628	22.3971	19.9156
P46782	RPS5	4.87145	5.74982	9	27.8117	28.3617	28.5203	22.4211	22.4211	22.602
P31943	HNRNPH1	6.17314	6.09969	9	29.6338	29.9255	29.9807	23.7174	23.8061	23.7174
P07737	PFN1	3.37558	6.31714	9	29.8024	30.0188	30.1534	23.0646	24.8287	23.1298
P15880	RPS2	4.55101	6.40034	9	28.4623	28.7786	29.0075	21.875	22.7425	22.4298
P54819	AK2	4.30074	6.56749	9	28.0048	28.4691	28.3156	21.3684	21.3684	22.3502
Q15365	PCBP1	7.91234	6.59428	9	29.3173	29.4113	29.3392	22.8147	22.6982	22.7721
P62805	H4C1	5.84989	6.80748	9	33.2184	33.5179	33.6944	26.6759	26.568	26.7645
P13804	ETFA	5.19889	7.1009	9	27.5791	28.0783	28.0411	20.6599	20.6149	21.1211
Q92900	UPF1	5.03378	8.08665	9	23.9155	24.8158	24.7206	16.3973	16.3973	16.3973
O43719	HTATSF1	8.33084	8.14577	9	24.6289	24.4952	24.5051	16.3973	16.3973	16.3973
Q12788	TBL3	5.00516	8.2518	9	24.0699	25.0467	24.8308	16.3973	16.3973	16.3973
O15355	PPM1G	2.21797	8.32852	9	25.5492	26.3794	26.8212	16.3973	16.3973	20.9695
P17844	DDX5	2.0001	8.5718	9	26.4724	26.7023	27.272	16.3973	16.3973	21.9366
O60664	PLIN3	5.12554	8.71423	9	24.6684	25.0041	25.6621	16.3973	16.3973	16.3973
Q2TAY7	SMU1	4.4146	8.78573	9	24.299	25.5517	25.6985	16.3973	16.3973	16.3973
P11413	G6PD	6.77908	8.83829	9	25.4632	25.1352	25.1084	16.3973	16.3973	16.3973
P78344	EIF4G2	6.63772	8.89091	9	25.0455	25.4575	25.3618	16.3973	16.3973	16.3973
Q13148	TARDBP	2.77054	8.91494	9	26.7362	26.1908	26.5463	19.9339	16.3973	16.3973
O43390	HNRNPR	2.43077	8.94147	9	26.6999	26.7095	27.0116	20.8019	16.3973	16.3973
Q14683	SMC1A	4.73966	8.97947	9	25.1045	24.9061	26.1198	16.3973	16.3973	16.3973
P49419	ALDH7A1	6.16446	9.0707	9	25.6027	25.665	25.1363	16.3973	16.3973	16.3973
P53618	COPB1	6.38953	9.19014	9	25.5155	25.8729	25.374	16.3973	16.3973	16.3973
O00151	PDLIM1	8.21909	9.2356	9	25.6029	25.7342	25.5617	16.3973	16.3973	16.3973
Q14203	DCTN1	5.22755	9.29566	9	25.7689	26.1591	25.151	16.3973	16.3973	16.3973
P62191	PSMC1	4.51044	9.32498	9	25.7314	24.9457	26.4899	16.3973	16.3973	16.3973
P43490	NAMPT	5.76835	9.39994	9	26.1483	25.4001	25.8434	16.3973	16.3973	16.3973
O15372	EIF3H	5.61992	9.46817	9	26.2155	25.4102	25.9708	16.3973	16.3973	16.3973
P39023	RPL3	2.53686	9.54235	9	26.8658	26.9272	28.2296	16.3973	20.601	16.3973
Q9Y2X3	NOP58	6.35569	9.84976	9	26.2926	26.5025	25.9461	16.3973	16.3973	16.3973
P48735	IDH2	6.04635	9.93055	9	26.704	26.0473	26.2323	16.3973	16.3973	16.3973
P26038	MSN	4.63049	10.0376	9	26.5445	25.6106	27.1496	16.3973	16.3973	16.3973
O60749	SNX2	8.08841	10.0559	9	26.3381	26.4753	26.5462	16.3973	16.3973	16.3973
P19623	SRM	8.66652	10.0912	9	26.5451	26.5185	26.402	16.3973	16.3973	16.3973
P07741	APRT	7.03433	10.1312	9	26.7201	26.5361	26.3293	16.3973	16.3973	16.3973
Q13561	DCTN2	6.13828	10.3042	9	26.3318	26.7941	26.9787	16.3973	16.3973	16.3973
P04181	OAT	3.05541	10.3186	9	27.7424	28.2583	27.5687	16.3973	19.8189	16.3973
P37837	TALDO1	6.16863	10.3976	9	26.5635	27.1733	26.648	16.3973	16.3973	16.3973
P42166	TMPO	9.14288	10.4044	9	26.8671	26.7878	26.7503	16.3973	16.3973	16.3973
P62906	RPL10A	2.41539	10.4399	9	28.4628	28.5619	28.6885	21.5988	16.3973	16.3973
P31153	MAT2A	5.91887	10.4565	9	26.4554	27.2209	26.8851	16.3973	16.3973	16.3973
P39019	RPS19	2.46301	10.5201	9	28.5587	28.4102	28.859	16.3973	21.4729	16.3973
P55084	HADHB	8.27815	10.5459	9	26.8298	26.9848	27.0152	16.3973	16.3973	16.3973
P36957	DLST	7.78782	10.6385	9	26.9092	27.0238	27.1745	16.3973	16.3973	16.3973
P29692	EEF1D	6.87893	10.921	9	27.0524	27.4416	27.4609	16.3973	16.3973	16.3973
P38117	ETFB	9.66153	10.9477	9	27.3546	27.2944	27.386	16.3973	16.3973	16.3973
P52907	CAPZA1	7.43265	10.9482	9	27.4689	27.1542	27.4135	16.3973	16.3973	16.3973
P17812	CTPS1	8.00894	10.9594	9	27.4218	27.2174	27.4308	16.3973	16.3973	16.3973
O60506	SYNCRIP	6.129	11.0919	9	27.1251	27.4963	27.8463	16.3973	16.3973	16.3973
P24752	ACAT1	6.74365	11.0989	9	27.6552	27.2042	27.6294	16.3973	16.3973	16.3973
P46060	RANGAP1	6.81332	11.1435	9	27.3334	27.8101	27.4792	16.3973	16.3973	16.3973
P46777	RPL5	2.91221	11.3079	9	29.0304	28.9976	29.2355	16.3973	16.3973	20.5453
P28066	PSMA5	6.89152	11.4109	9	27.5536	28.028	27.8432	16.3973	16.3973	16.3973
O00299	CLIC1	7.43315	11.4311	9	27.8445	27.6456	27.9952	16.3973	16.3973	16.3973
Q13162	PRDX4	7.89127	12.0422	9	28.2897	28.5719	28.4571	16.3973	16.3973	16.3973
P35232	PHB1	6.98534	12.1115	9	28.6875	28.2354	28.6034	16.3973	16.3973	16.3973
Q06830	PRDX1	5.34647	2.3959	10	31.3607	31.2138	31.3672	28.9263	28.8279	28.9998
P62937	PPIA	6.35809	4.33859	10	30.7716	30.7406	30.5794	26.2842	26.3742	26.4175
P30041	PRDX6	3.23385	6.1007	10	27.9968	28.2001	28.9447	21.7353	21.7353	23.3689
P07355	ANXA2	3.39	6.17979	10	27.3233	27.1261	27.8403	22.305	20.7227	20.7227
P12004	PCNA	3.26834	6.22302	10	29.2783	28.8758	28.409	23.3514	23.019	21.5237
Q92841	DDX17	3.80998	6.34025	10	28.7458	28.7263	28.8064	23.0365	22.6901	21.5312
P06748	NPM1	5.3897	6.61094	10	30.785	30.9429	30.8431	24.0612	24.0622	24.6148
Q7KZ85	SUPT6H	5.21775	7.22789	10	23.6493	24.0101	23.2162	16.3973	16.3973	16.3973
P60842	EIF4A1	3.05551	7.51825	10	30.2404	30.1184	30.466	21.9895	21.849	24.4315
P05388	RPLP0	5.66896	7.52503	10	30.053	30.1875	29.643	22.3519	22.3519	22.6046
Q14839	CHD4	3.23229	7.75542	10	22.5868	25.001	24.8704	16.3973	16.3973	16.3973
Q14008	CKAP5	11.6504	8.39637	10	24.7946	24.8046	24.7819	16.3973	16.3973	16.3973
P51610	HCFC1	5.63033	8.45946	10	25.0721	24.4335	25.0648	16.3973	16.3973	16.3973
O60271	SPAG9	6.09528	8.56501	10	25.1867	25.0572	24.6431	16.3973	16.3973	16.3973
Q9UHB9	SRP68	4.04877	8.77144	10	25.3313	25.7164	25.9984	17.9371	16.3973	16.3973
Q06210	GFPT1	5.17182	8.84338	10	24.8534	25.0643	25.8044	16.3973	16.3973	16.3973
P60228	EIF3E	6.3757	9.16297	10	25.6854	25.2631	25.7323	16.3973	16.3973	16.3973
O60264	SMARCA5	5.47448	9.19473	10	25.0886	25.8452	25.8424	16.3973	16.3973	16.3973
Q9Y262	EIF3L	3.76071	9.31102	10	24.502	25.7349	26.8882	16.3973	16.3973	16.3973
O00571	DDX3X	6.25165	9.31355	10	25.9809	25.7336	25.4181	16.3973	16.3973	16.3973
P46459	NSF	6.1646	9.42699	10	25.5436	26.1409	25.7885	16.3973	16.3973	16.3973
P02545	LMNA	7.15433	9.54111	10	25.9281	25.772	26.1152	16.3973	16.3973	16.3973
P26368	U2AF2	2.62348	9.65348	10	27.4587	27.3498	27.5686	16.3973	20.622	16.3973
Q8N1F7	NUP93	5.84384	9.92168	10	26.2124	26.0035	26.7411	16.3973	16.3973	16.3973
Q99873	PRMT1	7.30465	10.188	10	26.6464	26.395	26.7145	16.3973	16.3973	16.3973
O00232	PSMD12	7.13601	10.2343	10	26.4481	26.8206	26.6262	16.3973	16.3973	16.3973
P43686	PSMC4	6.34794	10.2574	10	26.3153	26.8274	26.8214	16.3973	16.3973	16.3973
Q15691	MAPRE1	5.40478	10.3977	10	26.2811	27.3076	26.7964	16.3973	16.3973	16.3973
Q15907	RAB11B	7.37362	10.763	10	27.1089	27.021	27.3509	16.3973	16.3973	16.3973
P16152	CBR1	7.91801	10.8111	10	27.1921	27.3412	27.0919	16.3973	16.3973	16.3973
P10768	ESD	5.96575	10.8238	10	27.412	27.4751	26.7762	16.3973	16.3973	16.3973
P18669	PGAM1	2.81712	11.1597	10	28.733	29.1403	29.1221	16.3973	16.3973	20.7217
Q15084	PDIA6	8.46469	12.0088	10	28.4427	28.2912	28.4846	16.3973	16.3973	16.3973
Q16555	DPYSL2	3.0498	3.19626	11	25.8811	25.7906	25.6736	23.2029	21.9724	22.5811
P00505	GOT2	4.03275	4.29277	11	28.6868	29.017	29.0713	24.3058	24.4841	25.1069
P38919	EIF4A3	2.55306	5.54868	11	27.3969	27.62	27.1591	21.0076	23.5148	21.0076
P51659	HSD17B4	4.80066	5.55756	11	29.2763	29.4723	29.5588	23.8007	23.5623	24.2718
P37802	TAGLN2	4.74222	6.2761	11	29.467	29.742	29.3137	22.7776	23.3888	23.528
P45880	VDAC2	3.68064	6.821	11	29.1336	29.5932	29.5872	21.6744	23.4103	22.7663
P61247	RPS3A	4.60351	7.09457	11	29.2244	29.5434	29.7087	21.8261	22.6182	22.7485
P62269	RPS18	3.95864	7.17525	11	29.5238	28.1534	28.6775	21.5981	21.1766	22.0543
P63104	YWHAZ	3.99384	7.68948	11	30.5599	30.3304	30.3758	23.715	22.2144	22.2682
Q14247	CTTN	5.74108	8.61664	11	24.6109	25.2452	25.1858	16.3973	16.3973	16.3973
Q15155	NOMO1	4.15045	8.84634	11	25.5077	25.9852	24.2381	16.3973	16.3973	16.3973
P62195	PSMC5	3.19798	8.99737	11	26.0698	26.0198	26.7799	16.3973	16.3973	19.0827
P27816	MAP4	6.64415	9.1333	11	25.674	25.6414	25.2765	16.3973	16.3973	16.3973
P06737	PYGL	4.00429	9.31893	11	26.3059	26.3225	24.5203	16.3973	16.3973	16.3973
P11177	PDHB	2.25968	9.41462	11	27.2021	27.2787	28.0685	16.3973	16.3973	21.5108
Q9UBT2	UBA2	4.48537	9.63883	11	26.7901	25.1801	26.1383	16.3973	16.3973	16.3973
P36871	PGM1	4.75358	9.7755	11	26.2732	25.4249	26.8203	16.3973	16.3973	16.3973
P09960	LTA4H	5.19046	9.90794	11	25.7257	26.8285	26.3616	16.3973	16.3973	16.3973
Q92499	DDX1	6.6114	9.97788	11	26.0937	26.4853	26.5465	16.3973	16.3973	16.3973
P52292	KPNA2	2.92063	9.9948	11	26.6317	27.7299	28.1933	16.3973	16.3973	19.7759
P49591	SARS1	5.61155	10.091	11	26.0641	26.4544	26.9464	16.3973	16.3973	16.3973
Q9BZZ5	API5	8.68387	10.2457	11	26.7308	26.6074	26.5908	16.3973	16.3973	16.3973
P30153	PPP2R1A	5.81904	10.2549	11	27.0947	26.5407	26.3211	16.3973	16.3973	16.3973
P08559	PDHA1	6.42633	10.341	11	27.038	26.475	26.702	16.3973	16.3973	16.3973
P80723	BASP1	6.26503	10.3832	11	26.4204	26.9474	26.9737	16.3973	16.3973	16.3973
P05091	ALDH2	5.77687	10.5071	11	26.5232	27.3522	26.8379	16.3973	16.3973	16.3973
Q15459	SF3A1	7.77851	10.5105	11	26.7553	26.9885	26.9797	16.3973	16.3973	16.3973
Q9Y5B9	SUPT16H	5.53268	10.5599	11	27.4987	26.8073	26.5658	16.3973	16.3973	16.3973
P40925	MDH1	2.47463	10.7745	11	28.7873	28.7783	29.1155	16.3973	16.3973	21.5631
Q16891	IMMT	6.45465	10.8095	11	26.8885	27.2717	27.4602	16.3973	16.3973	16.3973
P60900	PSMA6	6.69124	11.2466	11	27.8974	27.6645	27.3697	16.3973	16.3973	16.3973
Q99623	PHB2	2.86575	11.2518	11	29.2082	28.8044	29.1685	16.3973	20.631	16.3973
P23246	SFPQ	7.67814	11.506	11	27.8003	27.8302	28.0794	16.3973	16.3973	16.3973
Q15181	PPA1	8.14352	11.5828	11	28.0186	27.8476	28.0741	16.3973	16.3973	16.3973
Q9Y277	VDAC3	10.1254	12.0261	11	28.4345	28.38	28.4559	16.3973	16.3973	16.3973
P27348	YWHAQ	7.03918	12.5295	11	28.6538	29.0159	29.1107	16.3973	16.3973	16.3973
P22695	UQCRC2	5.49821	3.45372	12	27.051	27.0765	26.932	23.4842	23.73	23.4842
P22626	HNRNPA2B1	5.56271	6.25986	12	30.1163	29.9925	30.22	24.1427	23.7505	23.656
P09651	HNRNPA1	4.09879	6.33924	12	29.8314	30.0729	30.135	23.1852	23.4285	24.4079
P18124	RPL7	4.89648	6.62225	12	28.0599	27.784	28.4052	21.2825	21.8175	21.2825
P50395	GDI2	5.79335	7.3283	12	27.6414	28.1976	27.9184	20.6821	20.5452	20.5452
Q9BQG0	MYBBP1A	4.2566	8.70403	12	26.0172	24.9053	24.3816	16.3973	16.3973	16.3973
Q07065	CKAP4	6.69615	9.29274	12	25.8478	25.781	25.4414	16.3973	16.3973	16.3973
Q8N1G4	LRRC47	5.77944	9.37839	12	26.098	25.8619	25.3672	16.3973	16.3973	16.3973
Q14152	EIF3A	5.32696	9.42198	12	25.2601	26.0522	26.1456	16.3973	16.3973	16.3973
P08195	SLC3A2	2.28529	9.73318	12	27.909	27.8996	27.8516	16.3973	21.666	16.3973
Q8WUM4	PDCD6IP	7.10966	10.0254	12	26.626	26.3786	26.2635	16.3973	16.3973	16.3973
Q15233	NONO	2.35308	10.0655	12	27.8791	28.3958	28.3109	16.3973	21.5947	16.3973
O94826	TOMM70	6.9827	10.3067	12	26.548	26.9361	26.628	16.3973	16.3973	16.3973
O95373	IPO7	5.23701	10.3709	12	26.8736	27.2721	26.1589	16.3973	16.3973	16.3973
P34897	SHMT2	6.53513	11.622	12	27.9266	28.3537	27.7776	16.3973	16.3973	16.3973
P36578	RPL4	6.94573	12.6948	12	29.22	28.7953	29.2609	16.3973	16.3973	16.3973
Q9NSE4	IARS2	4.46796	3.1925	13	26.9209	27.008	26.5678	23.7992	23.56	23.56
P61221	ABCE1	2.66409	5.29294	13	26.7514	27.1433	26.4667	20.6076	20.9375	22.9374
P68104	EEF1A1	5.7513	5.65954	13	32.5645	32.3828	32.3708	26.9897	26.5882	26.7615
Q8NC51	SERBP1	2.55905	5.66124	13	28.8687	29.1188	29.6632	22.109	23.5822	24.9757
P63244	RACK1	3.96996	6.01382	13	28.4754	28.8519	28.3093	22.8935	22.889	21.8127
Q99714	HSD17B10	5.14727	6.60909	13	28.2562	27.8104	28.5557	21.658	21.5685	21.5685
P08865	RPSA	5.86481	6.68843	13	29.818	30.2255	30.2126	23.4201	23.4857	23.285
P0DMV9	HSPA1B	4.40528	6.78845	13	30.5895	30.4121	30.4532	24.3288	23.16	23.6006
O75390	CS	4.52806	7.0269	13	28.2781	28.8062	28.5754	21.231	21.231	22.1169
P17980	PSMC3	2.23369	8.6578	13	26.7064	27.0333	26.2172	16.3973	16.3973	21.1888
P35998	PSMC2	2.27584	8.962	13	26.9514	26.5731	27.3835	21.2274	16.3973	16.3973
P54136	RARS1	4.9001	9.05338	13	25.4393	26.0545	24.8583	16.3973	16.3973	16.3973
P28331	NDUFS1	6.08398	9.29308	13	25.5368	25.4871	26.0473	16.3973	16.3973	16.3973
P07910	HNRNPC	5.4983	9.29494	13	29.4438	29.7943	29.6328	20.1293	20.07	20.7867
P41252	IARS1	7.45217	9.50057	13	25.777	26.0574	25.8592	16.3973	16.3973	16.3973
Q9P2J5	LARS1	7.18422	9.68306	13	26.1918	25.883	26.1664	16.3973	16.3973	16.3973
Q8TCS8	PNPT1	5.31037	9.78024	13	25.5893	26.4926	26.4507	16.3973	16.3973	16.3973
P33992	MCM5	5.02127	10.1063	13	26.7071	26.9991	25.8048	16.3973	16.3973	16.3973
P55884	EIF3B	5.94458	10.362	13	26.7281	27.1486	26.4012	16.3973	16.3973	16.3973
O00410	IPO5	7.08253	10.4362	13	26.6132	26.8994	26.9879	16.3973	16.3973	16.3973
O14980	XPO1	6.6955	10.6854	13	27.0677	26.8399	27.3405	16.3973	16.3973	16.3973
P55786	NPEPPS	7.45913	10.7235	13	27.2875	26.9639	27.1111	16.3973	16.3973	16.3973
P00367	GLUD1	5.74591	10.853	13	27.1926	27.7163	26.8419	16.3973	16.3973	16.3973
P04844	RPN2	11.2026	11.5087	13	27.8836	27.9227	27.9117	16.3973	16.3973	16.3973
Q12905	ILF2	3.6342	11.8688	13	29.1089	29.1969	29.3243	16.3973	19.2289	16.3973
P23526	AHCY	7.10504	12.1189	13	28.3463	28.4315	28.7708	16.3973	16.3973	16.3973
P26599	PTBP1	4.34074	4.54952	14	29.3325	29.4734	29.4584	25.2048	24.9949	24.4161
O43175	PHGDH	3.38836	6.64607	14	28.8989	29.5155	29.597	22.6801	21.7071	23.686
P04406	GAPDH	3.91519	6.83772	14	31.8274	31.7065	32.1664	24.209	25.2946	25.6837
Q00341	HDLBP	2.26266	8.44952	14	26.5706	26.3393	26.263	21.0297	16.3973	16.3973
Q08J23	NSUN2	5.48082	10.1887	14	26.4207	26.2091	27.1283	16.3973	16.3973	16.3973
Q92598	HSPH1	5.16465	10.2498	14	27.3064	26.2087	26.4262	16.3973	16.3973	16.3973
Q16531	DDB1	8.8389	10.2882	14	26.6071	26.7427	26.7069	16.3973	16.3973	16.3973
P22234	PAICS	2.5399	10.4873	14	28.8586	28.5145	28.0698	16.3973	16.3973	21.1865
P26639	TARS1	7.3379	10.6438	14	27.2142	27.0398	26.8693	16.3973	16.3973	16.3973
P78347	GTF2I	5.65916	10.7693	14	27.0236	26.7961	27.6802	16.3973	16.3973	16.3973
P49915	GMPS	8.28069	11.0267	14	27.3207	27.5283	27.4229	16.3973	16.3973	16.3973
O00231	PSMD11	5.93667	11.0899	14	27.0303	27.64	27.7912	16.3973	16.3973	16.3973
Q9Y266	NUDC	7.89749	11.8437	14	28.0805	28.3174	28.3252	16.3973	16.3973	16.3973
Q9NZI8	IGF2BP1	10.0285	12.3337	14	28.7649	28.6834	28.7447	16.3973	16.3973	16.3973
P12268	IMPDH2	8.03455	12.4612	14	28.9909	28.8639	28.7207	16.3973	16.3973	16.3973
P27797	CALR	7.78417	12.6495	14	28.864	29.1302	29.1462	16.3973	16.3973	16.3973
Q9UQ80	PA2G4	8.54156	13.1301	14	29.4249	29.52	29.6373	16.3973	16.3973	16.3973
P54886	ALDH18A1	4.46525	4.14642	15	26.7767	27.005	27.3823	22.8071	22.8071	23.1105
Q12931	TRAP1	4.71742	5.71623	15	27.5464	28.1885	27.6317	21.9363	22.3426	21.9391
P06733	ENO1	5.83706	5.86879	15	32.3053	32.3098	32.6544	26.5285	26.6691	26.4655
Q16643	DBN1	3.06015	6.13453	15	26.2125	27.2157	27.4939	20.2731	21.9723	20.2731
P07195	LDHB	7.29742	6.40892	15	31.5461	31.4083	31.4809	25.1211	24.9762	25.1112
P05455	SSB	3.83863	6.46751	15	27.9669	28.2003	28.3007	20.8938	21.7334	22.4382
P60174	TPI1	3.69732	7.54607	15	30.7009	30.9036	31.0482	22.1988	23.8494	23.9664
P26640	VARS1	4.05798	9.19787	15	26.0474	24.459	26.2792	16.3973	16.3973	16.3973
Q9Y2L1	DIS3	6.02277	9.35847	15	25.4016	26.0354	25.8304	16.3973	16.3973	16.3973
P12277	CKB	2.43189	9.59024	15	31.1219	31.0526	30.8385	24.5644	19.839	19.839
Q9Y617	PSAT1	2.58743	9.84253	15	28.0992	27.2936	27.68	20.7505	16.3973	16.3973
Q9Y4L1	HYOU1	6.09691	10.3739	15	26.6033	26.5439	27.1664	16.3973	16.3973	16.3973
Q16658	FSCN1	5.60982	10.7349	15	27.1205	26.6674	27.6087	16.3973	16.3973	16.3973
O95202	LETM1	7.72659	10.866	15	27.2593	27.1246	27.4061	16.3973	16.3973	16.3973
Q99798	ACO2	6.38567	10.9766	15	27.4229	27.6543	27.0446	16.3973	16.3973	16.3973
O95831	AIFM1	6.62582	11.5495	15	28.0762	27.6233	28.1409	16.3973	16.3973	16.3973
P04843	RPN1	7.05382	11.6747	15	28.3151	27.8775	28.0236	16.3973	16.3973	16.3973
P08758	ANXA5	6.38261	12.0059	15	28.5727	28.6222	28.0149	16.3973	16.3973	16.3973
P40926	MDH2	6.27096	3.99403	16	31.3475	31.1876	31.177	27.2027	27.2008	27.3266
Q92945	KHSRP	5.07261	5.24098	16	28.4359	28.2068	28.5652	23.3526	22.8714	23.261
P00338	LDHA	4.14637	5.49848	16	31.0939	30.9168	31.3621	25.9897	25.0353	25.8523
P40227	CCT6A	4.23888	5.66681	16	29.1448	29.2332	29.3165	23.5918	23.009	24.0933
P14866	HNRNPL	2.41901	6.00181	16	28.2694	28.4371	27.8252	21.1971	24.1321	21.1971
Q15393	SF3B3	3.99269	6.10516	16	27.0369	27.57	26.5335	21.4556	20.6847	20.6847
P23396	RPS3	3.50528	6.64674	16	29.1312	29.3453	29.9615	22.1517	22.5049	23.8411
P49411	TUFM	2.60013	6.72935	16	28.2263	28.5164	28.2274	20.3867	20.8338	23.5616
P13010	XRCC5	5.4712	7.87767	16	28.1775	28.1046	28.6688	20.3156	20.3156	20.6866
Q02952	AKAP12	5.59881	9.37443	16	25.9581	25.2976	26.0596	16.3973	16.3973	16.3973
O43491	EPB41L2	7.32906	9.84031	16	26.0526	26.3337	26.3266	16.3973	16.3973	16.3973
Q9NR30	DDX21	4.17755	9.9632	16	27.3121	26.6799	26.7096	16.3973	16.3973	18.0174
P07814	EPRS1	4.73307	10.1027	16	25.6683	26.7682	27.0636	16.3973	16.3973	16.3973
P33993	MCM7	8.55106	10.3217	16	26.7958	26.7307	26.6306	16.3973	16.3973	16.3973
Q13435	SF3B2	6.02581	10.5925	16	26.6048	27.332	27.0327	16.3973	16.3973	16.3973
P33991	MCM4	7.73366	10.9044	16	27.3631	27.1407	27.4012	16.3973	16.3973	16.3973
Q9Y3F4	STRAP	5.99759	11.5315	16	28.3697	27.8416	27.5751	16.3973	16.3973	16.3973
P04075	ALDOA	5.68863	6.78622	17	30.1829	30.4532	30.3805	23.2669	23.7035	23.6876
P21796	VDAC1	4.69956	7.28161	17	30.2016	30.2193	30.0732	22.5745	22.5745	23.5002
P62258	YWHAE	5.73955	7.65231	17	31.1536	31.2839	31.1615	23.8857	23.302	23.4545
P25705	ATP5F1A	4.75567	7.69275	17	30.1576	30.3515	30.3491	22.24	23.2165	22.3235
Q13200	PSMD2	2.01725	8.52961	17	26.1789	27.0407	26.9915	16.3973	16.3973	21.8276
P27708	CAD	5.67435	9.90788	17	26.0992	26.0295	26.7869	16.3973	16.3973	16.3973
O75534	CSDE1	7.89719	10.1634	17	26.5628	26.4403	26.679	16.3973	16.3973	16.3973
Q00839	HNRNPU	2.45207	10.9553	17	29.2043	29.0863	29.1042	16.3973	21.7342	16.3973
Q9Y230	RUVBL2	5.85109	11.6269	17	28.4147	28.1163	27.5418	16.3973	16.3973	16.3973
P54577	YARS1	9.09792	12.1469	17	28.4733	28.6161	28.5434	16.3973	16.3973	16.3973
P50991	CCT4	4.42237	2.99642	18	29.1398	29.6146	29.3891	26.3221	26.5101	26.3221
Q14566	MCM6	6.56571	3.58706	18	27.1354	27.2241	27.2594	23.6935	23.5821	23.5821
Q14697	GANAB	3.12845	4.1217	18	27.1503	27.7938	28.3629	23.3757	23.3757	24.1905
P43243	MATR3	3.14058	6.1712	18	29.4755	29.008	29.1582	22.3984	22.3984	24.3312
P26641	EEF1G	4.59705	6.43988	18	29.5195	29.0379	29.4046	22.977	22.4003	23.2651
P61978	HNRNPK	3.88426	6.80491	18	31.0894	31.0842	31.2988	24.6494	23.4444	24.9638
Q4VCS5	AMOT	2.00393	9.20216	18	26.9825	27.7072	28.018	22.3066	16.3973	16.3973
P40939	HADHA	2.50636	10.14	18	27.8795	27.9068	28.5557	21.1273	16.3973	16.3973
Q9Y265	RUVBL1	2.87782	11.2446	18	28.9332	29.1088	29.098	16.3973	16.3973	20.6114
P07237	P4HB	3.36299	11.9355	18	29.5184	29.4596	29.367	19.7436	16.3973	16.3973
P29401	TKT	5.80798	12.2569	18	29.1976	28.4746	28.2905	16.3973	16.3973	16.3973
P17987	TCP1	4.06172	7.57994	19	28.842	29.0689	29.4047	21.2709	20.9209	22.3839
P07900	HSP90AA1	3.23005	7.67962	19	30.2133	30.1905	30.1055	23.5103	22.9943	20.9658
P08238	HSP90AB1	6.30352	7.82098	19	32.24	32.2019	32.2551	24.5524	24.148	24.5337
Q08211	DHX9	2.23497	9.68569	19	27.9094	27.8622	27.8919	16.3973	16.3973	21.8118
Q86VP6	CAND1	5.08582	10.2365	19	27.0209	26.9468	25.9336	16.3973	16.3973	16.3973
P28838	LAP3	9.17211	10.5636	19	26.8971	26.9707	27.015	16.3973	16.3973	16.3973
P55060	CSE1L	6.9913	11.5987	19	28.2082	28.0274	27.7525	16.3973	16.3973	16.3973
Q7KZF4	SND1	3.91599	4.77059	20	27.4572	27.8153	27.8609	22.6446	22.6446	23.5326
P46940	IQGAP1	7.04082	10.0593	20	26.4823	26.2516	26.6359	16.3973	16.3973	16.3973
Q02790	FKBP4	7.34655	12.1666	20	28.4004	28.7814	28.5098	16.3973	16.3973	16.3973
P49736	MCM2	4.72292	5.69018	21	27.4242	27.7411	27.3714	21.611	21.611	22.2441
P00558	PGK1	3.97891	7.84481	21	30.9712	31.2487	30.8714	22.4886	22.9173	24.1511
O75533	SF3B1	4.49729	9.86122	21	26.9383	26.4492	26.7478	16.3973	16.3973	17.757
P25205	MCM3	7.40253	11.1207	21	27.6145	27.622	27.3176	16.3973	16.3973	16.3973
P06576	ATP5F1B	7.55965	14.3157	21	30.9375	30.663	30.5385	16.3973	16.3973	16.3973
P27824	CANX	5.74767	4.82083	22	29.8465	30.0615	29.6722	25.0335	25.0507	25.0335
P49368	CCT3	5.5609	5.7986	22	29.4606	29.6818	29.6609	23.9406	23.5354	23.9315
P05023	ATP1A1	2.89328	9.50582	22	28.6352	28.8029	28.8446	21.6064	18.0794	18.0794
Q15029	EFTUD2	5.79835	11.146	22	27.4842	28.0083	27.1374	16.3973	16.3973	16.3973
Q14974	KPNB1	5.2896	4.45194	23	29.5458	29.66	29.9466	25.1632	25.2483	25.3851
P49588	AARS1	4.47821	4.63456	23	28.3955	28.1849	28.4391	23.4936	23.4936	24.1287
P52272	HNRNPM	5.04843	5.33181	23	30.099	30.1623	30.2896	25.0952	24.9553	24.5049
Q99832	CCT7	4.28291	7.45794	23	29.185	29.0066	29.2136	21.116	22.4557	21.4597
P49321	NASP	2.55389	10.3674	23	28.0907	28.2755	28.6441	16.3973	16.3973	21.1134
P31948	STIP1	2.5286	10.6024	23	28.8381	28.3516	28.7155	21.3032	16.3973	16.3973
P53396	ACLY	9.04031	11.7008	23	28.1214	28.1546	28.0182	16.3973	16.3973	16.3973
P31939	ATIC	7.13488	11.7507	23	28.2069	28.3265	27.9107	16.3973	16.3973	16.3973
Q13263	TRIM28	8.56703	12.5358	23	28.9354	29.032	28.8319	16.3973	16.3973	16.3973
P13667	PDIA4	8.22864	12.5378	23	28.9352	29.0568	28.8135	16.3973	16.3973	16.3973
P30101	PDIA3	4.67358	7.55443	24	29.6356	29.8448	30.0415	22.7786	22.3576	21.7225
P22102	GART	2.16593	9.31432	24	26.9215	27.5062	28.0608	16.3973	21.7509	16.3973
Q04637	EIF4G1	7.82643	11.8164	24	28.1243	28.1364	28.3805	16.3973	16.3973	16.3973
P19338	NCL	2.84767	13.0108	24	31.1696	31.1349	30.8826	16.3973	21.3599	16.3973
P11142	HSPA8	4.35874	7.32519	25	31.7857	32.0552	32.0598	24.0716	24.514	25.3395
Q12906	ILF3	7.45826	13.0024	25	29.1846	29.5699	29.4447	16.3973	16.3973	16.3973
P14618	PKM	5.84276	4.91899	26	31.3422	31.5107	31.5098	26.453	26.7216	26.4311
P13797	PLS3	3.35914	6.04393	26	29.9201	29.8978	29.9883	22.9974	24.9395	23.7376
P50990	CCT8	2.25186	6.14005	26	30.1213	30.2976	30.4382	22.9871	23.0481	26.4016
P48643	CCT5	3.88731	6.38349	26	28.8751	29.3009	29.2604	22.3449	22.3449	23.5962
P38646	HSPA9	7.83038	7.16321	26	30.6164	30.7526	30.7104	23.4716	23.5741	23.544
P11021	HSPA5	2.89367	12.6466	26	30.378	30.7292	30.7101	16.3973	16.3973	21.083
P08670	VIM	4.32221	7.63759	27	31.3924	31.2064	31.3815	22.8837	24.1064	24.0773
P78371	CCT2	3.74361	7.9893	27	30.2937	30.5094	30.2726	21.5089	22.0942	23.5047
P34932	HSPA4	4.97784	7.08723	28	29.2525	29.3546	28.9985	21.6436	22.3705	22.3299
P12956	XRCC6	2.11635	11.0404	28	29.831	29.7008	29.4359	16.3973	23.052	16.3973
Q14204	DYNC1H1	6.50339	9.7798	29	25.9982	26.0625	26.4707	16.3973	16.3973	16.3973
Q01082	SPTBN1	4.66895	4.57238	30	27.0116	27.5751	27.3827	22.6394	22.9736	22.6394
O75643	SNRNP200	5.61158	5.85955	30	27.4828	27.8113	27.9627	21.8491	21.8491	21.9799
P11586	MTHFD1	4.97222	6.36045	31	28.6744	29.298	29.407	22.8572	22.7204	22.7204
P14625	HSP90B1	2.02632	11.1231	31	29.788	29.923	29.9708	16.3973	16.3973	23.5178
P10809	HSPD1	4.67453	6.7001	32	32.1084	32.2802	32.5498	25.7179	25.1166	26.0036
P22314	UBA1	2.11607	7.35236	34	30.7248	30.7217	30.482	21.5008	26.2214	22.1494
Q00610	CLTC	10.4018	13.0564	35	29.4238	29.4434	29.494	16.3973	16.3973	16.3973
P35579	MYH9	8.76638	12.1114	36	28.4689	28.4497	28.6077	16.3973	16.3973	16.3973
P42704	LRPPRC	6.79825	6.92149	37	28.9597	29.0442	28.832	21.9606	21.9606	22.1504
P09874	PARP1	4.67085	7.96776	37	30.1994	29.9413	30.2759	21.824	22.8349	21.8543
Q9Y490	TLN1	5.34968	7.30923	40	27.681	27.7345	28.1345	20.3803	20.8619	20.3803
P13639	EEF2	3.78587	6.47175	41	31.6883	31.923	32.1635	25.498	24.6497	26.2118
P21333	FLNA	4.62227	9.09127	49	28.994	29.202	29.547	20.5073	19.4087	20.5532
P49327	FASN	4.79355	7.59602	66	30.7316	30.7394	30.513	23.3448	22.4674	23.3838

## Sheet: Table S7c
Table S7c. Identified RBPs from untreated HEK293T cells
Uniprot accession	Gene Symbol	-Log(BH-ajusted P-value）	Log2(Difference)	Unique peptides	Log2(Intensity.L.S1)	Log2(Intensity.L.S2)	Log2(Intensity.L.S3)	Log2(Intensity.H.S1)	Log2(Intensity.H.S2)	Log2(Intensity.H.S3)
Q9UEY8	ADD3	2.24388	1.06457	2	21.0114	21.0114	21.6031	20.1412	20.1498	20.1412
Q8WUA4	GTF3C2	2.76567	1.15681	2	21.4579	21.4579	21.8234	20.3274	20.3274	20.614
Q5T653	MRPL2	2.90697	1.21627	2	22.4911	22.1269	21.9905	20.9856	20.9884	20.9856
Q9Y646	CPQ	2.35285	1.30853	2	23.068	22.6015	22.3944	21.5422	21.1772	21.4189
P62942	FKBP1A	2.99965	1.36168	2	24.7541	24.3115	24.2761	23.0557	23.1592	23.0417
Q8NEW0	SLC30A7	2.93837	1.44533	2	23.2046	22.7547	22.736	21.6191	21.3701	21.3701
Q9UI30	TRMT112	2.20253	1.46226	2	24.2917	23.6242	24.5015	22.8496	22.5905	22.5905
P82663	MRPS25	3.63978	1.55529	2	22.8629	23.1691	23.275	21.5458	21.5495	21.5458
P61019	RAB2A	2.98462	1.59775	2	22.4937	22.3017	21.9805	20.5484	20.5484	20.8859
Q9ULX3	NOB1	3.96746	1.61673	2	23.1655	22.8953	22.9562	21.2875	21.5166	21.3627
Q93009	USP7	2.60194	1.62929	2	22.1122	22.1122	22.5581	20.4417	20.4417	21.0112
Q9Y3C6	PPIL1	5.49305	1.63522	2	23.4341	23.4341	23.5572	21.8734	21.8232	21.8232
P58546	MTPN	2.60344	1.70513	2	24.7491	25.1925	25.0518	23.1308	23.7195	23.0277
Q71RC2	LARP4	2.79062	1.71181	2	22.4294	21.8613	21.758	20.405	20.1338	20.3744
P21281	ATP6V1B2	2.17082	1.71585	2	21.8391	22.7761	21.777	20.3336	20.5774	20.3336
Q14165	MLEC	2.17766	1.73381	2	22.3508	22.388	21.4792	20.65	20.1833	20.1833
P61224	RAP1B	2.56775	1.78082	2	24.4273	24.7842	24.2721	22.9165	22.9552	22.2695
Q9BZ95	NSD3	3.19733	1.80638	2	24.3205	24.5839	24.3715	22.6294	22.9046	22.3227
Q9H8S9	MOB1A	2.18376	1.83148	2	22.4655	22.9403	22.3568	20.968	21.1433	20.1568
O00487	PSMD14	2.21273	1.83258	2	24.4861	24.469	24.1065	23.1522	22.0814	22.3302
Q8NF91	SYNE1	2.37451	1.87199	2	25.7335	25.6965	25.0446	24.0487	23.5372	23.2728
P25440	BRD2	6.23252	1.87522	2	22.5132	22.5132	22.5312	20.6114	20.6114	20.7092
P49642	PRIM1	2.58196	1.92384	2	23.6166	23.3566	22.677	21.2251	21.4285	21.2251
Q9UBB9	TFIP11	3.36986	1.95183	2	23.272	22.7334	22.7334	20.9324	21.0184	20.9324
P30044	PRDX5	2.93548	1.97446	2	24.6835	24.7818	24.5756	23.135	22.6386	22.3438
O00767	SCD	4.0619	2.046	2	23.4443	23.2435	23.2435	21.1565	21.1565	21.4801
P62140	PPP1CB	5.62729	2.05526	2	22.388	22.3934	22.309	20.3788	20.3176	20.2282
P62979	RPS27A	4.10299	2.05857	2	30.2193	29.9185	29.9807	28.1298	27.9761	27.837
Q5VTL8	PRPF38B	4.04825	2.0833	2	24.6286	24.3396	24.3396	22.5281	22.2649	22.2649
Q8NI60	COQ8A	3.91814	2.08406	2	22.1698	22.2505	22.245	19.9995	19.9995	20.4141
Q9NS86	LANCL2	2.52402	2.10881	2	22.5557	21.6189	21.5653	19.7426	19.9283	19.7426
P42677	RPS27	4.3967	2.19195	2	28.2078	28.2115	28.4681	26.0045	26.0646	26.2426
O00264	PGRMC1	3.55467	2.2204	2	23.6005	23.969	23.4114	21.3528	21.6141	21.3528
O15260	SURF4	6.20758	2.22602	2	22.8943	22.9087	22.9138	20.6401	20.6401	20.7586
P20073	ANXA7	2.98671	2.27683	2	22.7163	22.5648	22.7222	19.8679	20.6565	20.6484
O15173	PGRMC2	2.2324	2.2782	2	24.1863	24.0265	23.759	22.3207	20.941	21.8755
P62857	RPS28	2.83558	2.29296	2	25.9114	25.6406	25.0543	23.5363	23.0427	23.1484
O43929	ORC4	2.38127	2.34323	2	23.2034	24.3648	23.2034	21.1554	21.1554	21.431
Q9NSD9	FARSB	2.60747	2.34454	2	23.8044	23.3159	23.5155	20.5774	21.4293	21.5955
Q13547	HDAC1	3.55944	2.36224	2	24.6667	24.5992	24.6931	22.6609	22.0009	22.2104
P60866	RPS20	4.68629	2.36228	2	27.4565	27.3175	27.1272	24.8935	25.0092	24.9117
P09001	MRPL3	2.20861	2.38432	2	21.9907	21.3488	21.3488	18.7804	18.7804	19.9745
P04080	CSTB	2.81993	2.39448	2	24.9956	25.2751	24.6782	22.9246	22.7588	22.082
P35080	PFN2	2.37002	2.41993	2	22.4877	23.5929	22.2948	20.284	20.5476	20.284
P18077	RPL35A	2.83715	2.46173	2	26.2485	25.3319	25.3921	23.41	23.0537	23.1236
P22392	NME2	2.15773	2.47492	2	24.4362	24.7558	23.513	22.3785	21.4903	21.4115
P07437	TUBB	3.40215	2.50961	2	29.6665	29.2106	29.2327	27.1659	26.8546	26.5604
Q16778	H2BC21	2.73537	2.52107	2	31.9989	32.4531	32.3207	29.1857	29.7429	30.2809
P55039	DRG2	2.1523	2.52945	2	23.3522	22.8991	22.8991	21.468	20.047	20.047
Q9H6Z4	RANBP3	3.67911	2.54676	2	20.9184	21.4378	20.9184	18.7357	18.4493	18.4493
P40222	TXLNA	5.19709	2.60992	2	22.5767	22.5767	22.8137	20.0177	20.102	20.0177
P0DKX0	ZNF728	5.43666	2.64865	2	25.2586	25.1212	25.284	22.5315	22.5063	22.68
P47914	RPL29	4.37854	2.65016	2	27.506	27.6533	27.4328	24.7257	25.1178	24.7983
P13693	TPT1	3.38504	2.6623	2	24.5203	23.8548	24.0281	21.2252	21.4677	21.7233
Q9NR31	SAR1A	4.78666	2.6921	2	23.8751	24.1075	23.7941	21.2936	21.2866	21.1203
O75663	TIPRL	3.1567	2.71664	2	22.7183	23.6149	23.4219	20.6089	20.642	20.3542
Q86WX3	RPS19BP1	2.71669	2.74113	2	22.9412	22.9886	22.8901	19.4471	20.6245	20.5248
Q562R1	ACTBL2	4.20316	2.77958	2	25.2569	25.059	24.8676	22.1693	22.5061	22.1693
Q9GZT3	SLIRP	3.64503	2.80684	2	23.6526	24.2349	24.0051	21.2375	20.8777	21.3568
Q99880	H2BC13	4.28477	2.82903	2	29.4916	29.256	29.3069	26.638	26.2504	26.6791
Q9BVA1	TUBB2B	3.82955	2.82982	2	23.9018	23.8742	23.4142	20.776	20.776	21.1487
O95299	NDUFA10	3.04758	2.87543	2	23.4985	22.4451	23.3051	20.2525	20.185	20.185
Q9NP79	VTA1	3.1384	2.97699	2	24.6337	24.8195	24.6416	21.4089	22.3461	21.4089
P67936	TPM4	3.75095	3.08112	2	24.5036	25.0024	24.7255	21.3075	21.8145	21.8661
Q15654	TRIP6	4.76567	3.09269	2	21.5101	21.4653	21.5472	18.2896	18.6655	18.2896
P30040	ERP29	3.20752	3.12926	2	24.137	24.0564	23.2331	20.8122	20.827	20.3996
Q9UKD2	MRTO4	2.06776	3.1417	2	22.9733	23.3822	21.6028	18.7731	19.8645	19.8955
P10606	COX5B	4.9279	3.31395	2	24.5264	24.3362	24.5388	21.1896	20.9545	21.3153
Q15819	UBE2V2	3.57316	3.3608	2	24.749	25.2689	25.692	21.8237	21.8237	21.9801
Q96BK5	PINX1	3.49068	3.37089	2	22.9463	22.6648	22.1066	19.3226	18.8906	19.3919
P08579	SNRPB2	2.76298	3.60776	2	19.4346	18.787	20.1422	16.4152	15.5626	15.5626
Q06124	PTPN11	3.83071	3.67108	2	21.4609	21.4284	21.3998	17.4985	17.4985	18.2789
P05114	HMGN1	4.43693	5.13708	2	19.4103	19.0286	18.5252	13.851	13.851	13.851
P30085	CMPK1	3.15758	5.19242	2	20.1408	18.4947	18.4947	13.851	13.851	13.851
O94927	HAUS5	4.68546	5.42392	2	19.0406	19.0406	19.7435	13.851	13.851	13.851
Q9P013	CWC15	2.12466	5.75526	2	21.9096	18.4546	18.4546	13.851	13.851	13.851
Q68E01	INTS3	4.50705	5.84822	2	19.6601	19.2347	20.2028	13.851	13.851	13.851
O00291	HIP1	5.36909	5.88039	2	19.5603	20.0735	19.5603	13.851	13.851	13.851
Q08378	GOLGA3	7.00905	5.98167	2	19.765	19.9679	19.765	13.851	13.851	13.851
Q9ULH0	KIDINS220	5.7157	6.08367	2	19.7897	19.7897	20.2245	13.851	13.851	13.851
Q04724	TLE1	6.78945	6.29839	2	20.0685	20.311	20.0685	13.851	13.851	13.851
P62306	SNRPF	5.79895	6.33483	2	23.1224	23.5336	23.5264	17.0121	17.0121	17.1536
P57737	CORO7	3.3923	6.36101	2	21.3814	19.6273	19.6273	13.851	13.851	13.851
Q9Y2X9	ZNF281	5.2359	6.3995	2	20.2208	19.918	20.6126	13.851	13.851	13.851
Q13526	PIN1	8.49643	6.43446	2	20.2545	20.3472	20.2545	13.851	13.851	13.851
A0AVT1	UBA6	2.59127	6.44902	2	22.2212	19.3394	19.3394	13.851	13.851	13.851
Q96GM5	SMARCD1	5.99588	6.45708	2	20.5698	20.1772	20.1772	13.851	13.851	13.851
P98194	ATP2C1	5.48217	6.48408	2	20.1583	20.6885	20.1583	13.851	13.851	13.851
Q96KB5	PBK	2.74768	6.50738	2	19.4778	22.1195	19.4778	13.851	13.851	13.851
Q9Y312	AAR2	2.20779	6.54203	2	21.8849	21.7317	21.2376	13.851	17.5262	13.851
Q9NQW6	ANLN	6.11964	6.55791	2	20.2851	20.6564	20.2851	13.851	13.851	13.851
P69849	NOMO3	4.96067	6.58195	2	20.4328	20.8529	20.013	13.851	13.851	13.851
P53384	NUBP1	2.73072	6.59981	2	22.2555	19.5484	19.5484	13.851	13.851	13.851
Q9UJA5	TRMT6	6.91059	6.65986	2	20.4311	20.6702	20.4311	13.851	13.851	13.851
Q5W0B1	OBI1	4.06544	6.67529	2	21.3041	20.3799	19.8948	13.851	13.851	13.851
P46063	RECQL	3.04229	6.67883	2	22.0404	19.8398	19.7092	13.851	13.851	13.851
P53992	SEC24C	3.72994	6.6825	2	21.5404	20.03	20.03	13.851	13.851	13.851
Q9UBC2	EPS15L1	5.66747	6.70402	2	20.3908	20.8834	20.3908	13.851	13.851	13.851
Q9NX14	NDUFB11	2.83936	6.7191	2	22.2898	19.7102	19.7102	13.851	13.851	13.851
Q13576	IQGAP2	3.59812	6.72648	2	21.6726	20.0298	20.0298	13.851	13.851	13.851
O14578	CIT	9.95156	6.73187	2	20.5689	20.6108	20.5689	13.851	13.851	13.851
Q9UBE0	SAE1	3.49821	6.73838	2	19.833	20.2017	21.7334	13.851	13.851	13.851
Q8N999	RLIG1	3.86794	6.81001	2	21.6075	20.1877	20.1877	13.851	13.851	13.851
Q9HAU0	PLEKHA5	4.31495	6.91345	2	21.2973	20.9432	20.0527	13.851	13.851	13.851
Q07866	KLC1	4.78427	6.9407	2	21.3579	20.5085	20.5085	13.851	13.851	13.851
P61160	ACTR2	7.75591	6.94542	2	20.8607	20.6955	20.833	13.851	13.851	13.851
Q5JRA6	MIA3	4.81895	6.96555	2	20.538	20.538	21.3735	13.851	13.851	13.851
Q13601	KRR1	4.09643	7.00085	2	20.098	20.8857	21.5717	13.851	13.851	13.851
Q92643	PIGK	5.30205	7.02466	2	20.6632	21.3005	20.6632	13.851	13.851	13.851
Q9UHR5	SAP30BP	4.46058	7.02866	2	20.5337	20.5337	21.5714	13.851	13.851	13.851
O60488	ACSL4	7.5546	7.03054	2	20.8235	20.8235	20.9976	13.851	13.851	13.851
P29144	TPP2	5.29744	7.03622	2	21.3139	20.6738	20.6738	13.851	13.851	13.851
Q13395	TARBP1	3.77882	7.05079	2	20.3855	20.3855	21.9342	13.851	13.851	13.851
O60524	NEMF	3.8229	7.05198	2	20.4589	21.907	20.3429	13.851	13.851	13.851
P21283	ATP6V1C1	3.62351	7.05491	2	22.0375	20.3401	20.3401	13.851	13.851	13.851
P25685	DNAJB1	3.62807	7.11102	2	20.3932	22.0996	20.3932	13.851	13.851	13.851
Q86Y07	VRK2	5.66816	7.11108	2	21.3102	20.788	20.788	13.851	13.851	13.851
P00450	CP	2.96885	7.11115	2	20.1206	20.1206	22.6452	13.851	13.851	13.851
P07384	CAPN1	10.6641	7.12012	2	20.9613	20.9907	20.9613	13.851	13.851	13.851
P52594	AGFG1	6.256	7.14798	2	20.8742	20.8742	21.2483	13.851	13.851	13.851
Q13769	THOC5	6.27744	7.15374	2	21.2512	20.8814	20.8814	13.851	13.851	13.851
P05091	ALDH2	3.90448	7.18	2	22.0078	20.5425	20.5425	13.851	13.851	13.851
O95218	ZRANB2	3.92391	7.18015	2	20.5482	20.5482	21.9969	13.851	13.851	13.851
Q9H6T3	RPAP3	4.10019	7.19093	2	20.4807	20.7437	21.9013	13.851	13.851	13.851
P43246	MSH2	4.41771	7.20002	2	20.6877	21.7775	20.6877	13.851	13.851	13.851
Q9Y2L5	TRAPPC8	3.54706	7.23527	2	22.2849	20.3207	20.6531	13.851	13.851	13.851
Q9BYB4	GNB1L	4.70307	7.24009	2	20.7815	21.7102	20.7815	13.851	13.851	13.851
Q96P11	NSUN5	8.17457	7.2404	2	21.175	21.0495	21.0495	13.851	13.851	13.851
Q7Z5K2	WAPL	4.16433	7.25005	2	21.5129	21.5367	20.2535	13.851	13.851	13.851
Q9Y3C1	NOP16	3.39422	7.26118	2	20.4455	22.4455	20.4455	13.851	13.851	13.851
Q9H089	LSG1	3.68085	7.26797	2	20.5553	22.2461	20.5553	13.851	13.851	13.851
O15127	SCAMP2	4.25623	7.2758	2	20.7236	20.7236	21.9331	13.851	13.851	13.851
Q6P2H3	CEP85	3.31604	7.29829	2	22.4674	20.9081	20.0722	13.851	13.851	13.851
O94822	LTN1	5.08611	7.30161	2	21.4753	20.6601	21.3223	13.851	13.851	13.851
P55145	MANF	8.30401	7.30852	2	21.234	21.1011	21.1435	13.851	13.851	13.851
Q9UJX3	ANAPC7	3.80732	7.31572	2	21.986	21.3306	20.1835	13.851	13.851	13.851
O75083	WDR1	6.4828	7.32688	2	21.4006	21.0897	21.0433	13.851	13.851	13.851
P28331	NDUFS1	6.70791	7.32877	2	21.0583	21.3749	21.106	13.851	13.851	13.851
O95248	SBF1	5.86283	7.33411	2	21.5061	21.0246	21.0246	13.851	13.851	13.851
P50748	KNTC1	3.94921	7.36137	2	20.7245	20.7245	22.188	13.851	13.851	13.851
P48507	GCLM	6.65209	7.39056	2	21.1389	21.4468	21.1389	13.851	13.851	13.851
Q05682	CALD1	5.21159	7.39652	2	21.6389	21.2793	20.8243	13.851	13.851	13.851
Q9HB07	MYG1	6.34462	7.40397	2	21.019	21.4317	21.3141	13.851	13.851	13.851
Q15102	PAFAH1B3	3.43073	7.40476	2	19.9336	22.0472	21.7864	13.851	13.851	13.851
O94832	MYO1D	4.09179	7.40749	2	20.8105	22.1619	20.803	13.851	13.851	13.851
P35520	CBS	6.38605	7.41087	2	21.4947	21.1953	21.0955	13.851	13.851	13.851
P31350	RRM2	4.46577	7.41759	2	21.9964	20.9046	20.9046	13.851	13.851	13.851
Q53S33	BOLA3	3.99011	7.42879	2	22.2411	20.7991	20.7991	13.851	13.851	13.851
Q63HN8	RNF213	3.25878	7.42916	2	22.7429	20.7343	20.3633	13.851	13.851	13.851
O75150	RNF40	3.79272	7.43477	2	20.6377	22.3578	20.8617	13.851	13.851	13.851
Q00535	CDK5	3.76145	7.44288	2	20.4618	21.0854	22.3343	13.851	13.851	13.851
O95714	HERC2	10.7204	7.44312	2	21.314	21.2842	21.2842	13.851	13.851	13.851
Q7Z3J2	VPS35L	4.30078	7.44355	2	20.7322	22.0732	21.0782	13.851	13.851	13.851
Q9NR50	EIF2B3	11.3479	7.4625	2	21.3065	21.3273	21.3065	13.851	13.851	13.851
O14579	COPE	3.19969	7.50355	2	22.9011	20.5812	20.5812	13.851	13.851	13.851
P99999	CYCS	4.4989	7.50713	2	21.2164	20.8153	22.0426	13.851	13.851	13.851
Q7Z2T5	TRMT1L	6.43908	7.51145	2	21.3286	21.5815	21.1772	13.851	13.851	13.851
Q9Y2K7	KDM2A	3.15374	7.51481	2	22.9552	20.4935	20.6487	13.851	13.851	13.851
O15126	SCAMP1	4.03019	7.52079	2	20.8964	22.3225	20.8964	13.851	13.851	13.851
Q96RR1	TWNK	3.7915	7.52885	2	22.4741	20.8327	20.8327	13.851	13.851	13.851
Q96A65	EXOC4	3.73956	7.56573	2	20.8499	22.5503	20.8499	13.851	13.851	13.851
Q86YQ8	CPNE8	4.69409	7.56641	2	21.0922	21.0922	22.0678	13.851	13.851	13.851
Q32P41	TRMT5	9.73957	7.57008	2	21.4033	21.4566	21.4033	13.851	13.851	13.851
Q14674	ESPL1	4.56025	7.57789	2	20.733	21.8688	21.6848	13.851	13.851	13.851
Q0VDF9	HSPA14	5.04986	7.59499	2	21.9406	21.0305	21.3668	13.851	13.851	13.851
Q9H223	EHD4	5.1414	7.59588	2	21.8893	21.0164	21.4349	13.851	13.851	13.851
Q15070	OXA1L	6.47806	7.59649	2	21.3309	21.3309	21.6807	13.851	13.851	13.851
Q6P9B9	INTS5	6.29421	7.59784	2	21.3192	21.3192	21.7081	13.851	13.851	13.851
Q9NPF4	OSGEP	3.71434	7.60986	2	21.9667	22.1093	20.3065	13.851	13.851	13.851
P52888	THOP1	4.5194	7.61083	2	20.9995	21.2105	22.1754	13.851	13.851	13.851
O43826	SLC37A4	3.24452	7.61249	2	21.27	22.8726	20.2478	13.851	13.851	13.851
Q9Y2R5	MRPS17	6.2314	7.61696	2	21.7375	21.3331	21.3331	13.851	13.851	13.851
Q9Y4I1	MYO5A	8.94895	7.61723	2	21.4358	21.5243	21.4444	13.851	13.851	13.851
Q9HC52	CBX8	5.36567	7.63918	2	21.2675	21.2675	21.9355	13.851	13.851	13.851
Q9P289	STK26	4.56098	7.64368	2	21.1398	22.2044	21.1398	13.851	13.851	13.851
Q5TC12	ATPAF1	5.59522	7.64631	2	21.1146	21.7558	21.6214	13.851	13.851	13.851
O75122	CLASP2	4.16199	7.64999	2	21.8052	22.0784	20.6194	13.851	13.851	13.851
P29992	GNA11	4.62447	7.65644	2	21.1648	22.1927	21.1648	13.851	13.851	13.851
Q86TB9	PATL1	7.23011	7.6661	2	21.6697	21.4408	21.4408	13.851	13.851	13.851
Q9NQP4	PFDN4	4.0278	7.6749	2	22.4975	21.0401	21.0401	13.851	13.851	13.851
Q9C0C9	UBE2O	3.9604	7.68426	2	22.5471	21.0293	21.0293	13.851	13.851	13.851
Q9BT22	ALG1	6.46609	7.69477	2	21.4268	21.7836	21.4268	13.851	13.851	13.851
Q9C0C2	TNKS1BP1	10.1664	7.70313	2	21.54	21.5824	21.54	13.851	13.851	13.851
Q9NQ88	TIGAR	4.83269	7.72348	2	22.0763	21.6279	21.0191	13.851	13.851	13.851
Q6P1M0	SLC27A4	4.8755	7.72584	2	21.878	20.9789	21.8735	13.851	13.851	13.851
P28340	POLD1	3.44556	7.73899	2	22.9686	20.9006	20.9006	13.851	13.851	13.851
Q8TB61	SLC35B2	3.75265	7.744	2	22.7464	21.0192	21.0192	13.851	13.851	13.851
Q8NFC6	BOD1L1	5.8536	7.74643	2	21.9098	21.3231	21.5593	13.851	13.851	13.851
Q9ULT8	HECTD1	3.81502	7.74705	2	22.7041	20.9584	21.1315	13.851	13.851	13.851
Q02413	DSG1	5.49232	7.75003	2	21.391	21.391	22.021	13.851	13.851	13.851
Q9ULX6	AKAP8L	5.22328	7.76727	2	22.1099	21.3724	21.3724	13.851	13.851	13.851
Q1ED39	KNOP1	5.10685	7.79025	2	22.1686	21.3775	21.3775	13.851	13.851	13.851
Q99829	CPNE1	5.71356	7.7958	2	21.4608	22.0186	21.4608	13.851	13.851	13.851
Q7Z739	YTHDF3	3.9973	7.83515	2	22.6936	21.1245	21.2402	13.851	13.851	13.851
Q86Y82	STX12	7.5701	7.83622	2	21.6231	21.8155	21.6231	13.851	13.851	13.851
Q01581	HMGCS1	5.30622	7.84046	2	21.7299	22.0805	21.2639	13.851	13.851	13.851
Q6IAN0	DHRS7B	3.66681	7.85405	2	22.9332	21.0909	21.0909	13.851	13.851	13.851
Q14738	PPP2R5D	4.18716	7.85581	2	21.2536	22.6131	21.2536	13.851	13.851	13.851
Q9H2H8	PPIL3	3.84447	7.86429	2	22.7948	20.9587	21.3923	13.851	13.851	13.851
Q9H2W6	MRPL46	3.97936	7.86626	2	21.3854	22.7224	21.0438	13.851	13.851	13.851
Q99614	TTC1	3.44558	7.87719	2	23.1314	21.0266	21.0266	13.851	13.851	13.851
Q86XI2	NCAPG2	3.88353	7.89497	2	21.2023	22.8333	21.2023	13.851	13.851	13.851
Q6L8Q7	PDE12	5.57886	7.89582	2	22.1538	21.5433	21.5433	13.851	13.851	13.851
Q9BV86	NTMT1	4.39278	7.90106	2	21.3476	21.3476	22.5609	13.851	13.851	13.851
Q9BUF5	TUBB6	3.39834	7.914	2	20.321	22.3751	22.5988	13.851	13.851	13.851
Q9Y2W2	WBP11	5.55522	7.92549	2	22.1907	21.5694	21.5694	13.851	13.851	13.851
Q86Y39	NDUFA11	3.00459	7.94472	2	23.636	20.8755	20.8755	13.851	13.851	13.851
O60762	DPM1	3.81052	7.94867	2	21.3717	21.0962	22.931	13.851	13.851	13.851
Q9UQ88	CDK11A	5.68328	7.9536	2	21.6115	22.1906	21.6115	13.851	13.851	13.851
P22059	OSBP	7.30657	7.95961	2	21.6811	21.9437	21.807	13.851	13.851	13.851
Q96SU4	OSBPL9	4.19712	8.00544	2	21.3973	21.3973	22.7747	13.851	13.851	13.851
Q6P1J9	CDC73	5.17796	8.00601	2	22.3772	21.5969	21.5969	13.851	13.851	13.851
P17858	PFKL	5.16576	8.00876	2	21.5977	22.3838	21.5977	13.851	13.851	13.851
Q04323	UBXN1	5.05482	8.02919	2	21.3296	22.245	22.0659	13.851	13.851	13.851
O75027	ABCB7	4.21922	8.05133	2	21.5542	22.8061	21.3466	13.851	13.851	13.851
Q8NEV1	CSNK2A3	5.10494	8.06525	2	21.4615	21.8808	22.4063	13.851	13.851	13.851
Q9BRL6	SRSF8	4.48475	8.06745	2	21.5964	21.4614	22.6975	13.851	13.851	13.851
Q7Z4V5	HDGFL2	6.50826	8.07104	2	21.873	21.7399	22.1531	13.851	13.851	13.851
Q9Y324	FCF1	4.95847	8.07791	2	21.6309	22.5248	21.6309	13.851	13.851	13.851
Q13505	MTX1	6.65079	8.07986	2	22.1554	21.8185	21.8185	13.851	13.851	13.851
O00442	RTCA	3.92201	8.08486	2	23.009	21.2406	21.5578	13.851	13.851	13.851
Q92890	UFD1	6.29036	8.11666	2	21.8288	22.2453	21.8288	13.851	13.851	13.851
Q9UBI6	GNG12	6.0572	8.13081	2	22.2961	21.8674	21.7819	13.851	13.851	13.851
Q15382	RHEB	4.9678	8.16323	2	22.2823	22.3439	21.4163	13.851	13.851	13.851
P11310	ACADM	5.83822	8.20684	2	21.9317	21.8249	22.4169	13.851	13.851	13.851
Q7L4I2	RSRC2	4.96365	8.2203	2	21.769	21.769	22.6758	13.851	13.851	13.851
Q99426	TBCB	4.85845	8.23296	2	22.6958	21.9507	21.6054	13.851	13.851	13.851
Q76FK4	NOL8	9.4385	8.24787	2	22.0758	22.0758	22.1449	13.851	13.851	13.851
P21912	SDHB	4.15838	8.25221	2	21.3293	22.9939	21.9863	13.851	13.851	13.851
Q9NPF5	DMAP1	12.0415	8.26686	2	22.1127	22.1281	22.1127	13.851	13.851	13.851
Q9UHV9	PFDN2	3.1831	8.27161	2	23.8444	21.2617	21.2617	13.851	13.851	13.851
P54920	NAPA	3.71026	8.29526	2	20.8832	22.8297	22.7258	13.851	13.851	13.851
O15027	SEC16A	4.5567	8.30669	2	22.4179	22.6581	21.397	13.851	13.851	13.851
Q14409	GK3	7.58525	8.31118	2	22.2801	22.1599	22.0465	13.851	13.851	13.851
Q15293	RCN1	5.48545	8.31523	2	22.5511	22.1797	21.7678	13.851	13.851	13.851
P48739	PITPNB	5.04032	8.31718	2	21.8756	21.8756	22.7533	13.851	13.851	13.851
Q6NXE6	ARMC6	4.3326	8.32908	2	22.3175	22.8667	21.3559	13.851	13.851	13.851
O00217	NDUFS8	5.40571	8.34225	2	22.5785	22.2416	21.7596	13.851	13.851	13.851
Q8IUF8	RIOX2	3.92149	8.34439	2	22.1796	21.2299	23.1766	13.851	13.851	13.851
P30519	HMOX2	3.79722	8.35679	2	22.833	20.9974	22.7929	13.851	13.851	13.851
P40763	STAT3	5.13752	8.36458	2	22.6314	21.6875	22.3278	13.851	13.851	13.851
P08047	SP1	8.03032	8.36926	2	22.2471	22.2948	22.1188	13.851	13.851	13.851
Q96E11	MRRF	7.00822	8.37387	2	22.3766	22.0508	22.2472	13.851	13.851	13.851
Q9NX24	NHP2	9.94092	8.37511	2	22.2086	22.2086	22.2611	13.851	13.851	13.851
P78345	RPP38	4.87057	8.38757	2	22.4772	22.6437	21.5947	13.851	13.851	13.851
O95340	PAPSS2	5.49098	8.38934	2	22.0128	22.6953	22.0128	13.851	13.851	13.851
Q8WW12	PCNP	3.67196	8.39389	2	21.2861	21.9529	23.4956	13.851	13.851	13.851
P84157	MXRA7	5.98824	8.39418	2	22.532	22.2627	21.9408	13.851	13.851	13.851
Q9NPI6	DCP1A	4.27597	8.4258	2	23.124	22.1708	21.5356	13.851	13.851	13.851
P51665	PSMD7	2.55399	8.43114	2	24.0453	23.0201	19.7808	13.851	13.851	13.851
Q13442	PDAP1	4.09113	8.43557	2	21.2844	22.9906	22.5846	13.851	13.851	13.851
P11216	PYGB	4.49982	8.44836	2	21.8929	23.1121	21.8929	13.851	13.851	13.851
P11766	ADH5	5.25318	8.46742	2	22.2354	22.8104	21.9094	13.851	13.851	13.851
Q5VW36	FOCAD	6.78432	8.48655	2	22.2283	22.5559	22.2283	13.851	13.851	13.851
O43765	SGTA	3.74128	8.54128	2	21.753	23.6708	21.753	13.851	13.851	13.851
Q7KZI7	MARK2	4.35012	8.5468	2	23.2452	22.2285	21.7196	13.851	13.851	13.851
P55327	TPD52	4.40327	8.56445	2	23.2869	21.9797	21.9797	13.851	13.851	13.851
O60231	DHX16	6.48469	8.57736	2	22.1685	22.5894	22.5271	13.851	13.851	13.851
Q9H3Z4	DNAJC5	6.85954	8.57979	2	22.325	22.325	22.6422	13.851	13.851	13.851
P37840	SNCA	4.95337	8.61483	2	21.8364	22.8674	22.6936	13.851	13.851	13.851
Q9NVV0	TMEM38B	6.09236	8.6159	2	22.2302	22.7848	22.3857	13.851	13.851	13.851
O43504	LAMTOR5	4.97649	8.62912	2	23.11	22.1651	22.1651	13.851	13.851	13.851
Q6PK04	CCDC137	4.22582	8.64091	2	23.4619	22.0898	21.9239	13.851	13.851	13.851
Q9H9Y2	RPF1	5.90232	8.64245	2	22.6988	22.6569	22.1245	13.851	13.851	13.851
O00193	SMAP	4.23957	8.73809	2	23.0547	23.1008	21.6116	13.851	13.851	13.851
O75530	EED	4.8955	8.749	2	22.2653	22.2653	23.2693	13.851	13.851	13.851
Q15785	TOMM34	5.05994	8.75675	2	22.4459	23.1972	22.18	13.851	13.851	13.851
P61106	RAB14	6.38098	8.76975	2	22.9054	22.4783	22.4783	13.851	13.851	13.851
Q8NCW5	NAXE	4.80996	8.78671	2	22.097	23.3016	22.5144	13.851	13.851	13.851
Q9Y5Q9	GTF3C3	6.47833	8.78906	2	22.5051	22.9098	22.5051	13.851	13.851	13.851
P54727	RAD23B	8.68157	8.79251	2	22.6055	22.7194	22.6055	13.851	13.851	13.851
P06493	CDK1	3.75857	8.81733	2	22.0647	21.9666	23.9736	13.851	13.851	13.851
Q9Y3B9	RRP15	7.30392	8.82067	2	22.5875	22.8399	22.5875	13.851	13.851	13.851
Q15477	SKIC2	3.54349	8.83358	2	21.9419	21.9419	24.1698	13.851	13.851	13.851
P48556	PSMD8	4.09999	8.8622	2	23.6272	22.7473	21.765	13.851	13.851	13.851
Q9UBW8	COPS7A	8.91217	8.87413	2	22.6916	22.6916	22.7922	13.851	13.851	13.851
P62310	LSM3	7.52152	8.88861	2	22.8892	22.6648	22.6648	13.851	13.851	13.851
Q9HBH5	RDH14	3.86044	8.89614	2	23.6471	21.556	23.0381	13.851	13.851	13.851
Q7Z434	MAVS	5.57401	8.89703	2	22.3298	23.123	22.7912	13.851	13.851	13.851
Q99496	RNF2	8.01708	8.92118	2	22.7157	22.7157	22.885	13.851	13.851	13.851
P00441	SOD1	4.44056	8.95952	2	22.235	22.5079	23.6886	13.851	13.851	13.851
Q8N1G2	CMTR1	6.15653	8.96186	2	23.144	22.6473	22.6473	13.851	13.851	13.851
Q6IBS0	TWF2	5.36266	8.99045	2	22.3693	22.8784	23.2765	13.851	13.851	13.851
O43818	RRP9	7.47635	9.00577	2	23.0081	22.8121	22.7499	13.851	13.851	13.851
Q9NQG5	RPRD1B	6.45156	9.03807	2	23.1708	22.7482	22.7482	13.851	13.851	13.851
P12955	PEPD	6.38818	9.04363	2	23.187	22.7484	22.7484	13.851	13.851	13.851
Q9NVH2	INTS7	4.66737	9.0964	2	22.5503	22.5503	23.7415	13.851	13.851	13.851
P61158	ACTR3	5.40169	9.12097	2	22.7115	22.7115	23.4928	13.851	13.851	13.851
Q92665	MRPS31	5.05702	9.16586	2	23.6473	22.7897	22.6134	13.851	13.851	13.851
O43399	TPD52L2	5.22568	9.28753	2	23.4643	22.5526	23.3986	13.851	13.851	13.851
Q15843	NEDD8	5.66038	9.30782	2	23.603	23.0327	22.8407	13.851	13.851	13.851
O75964	ATP5MG	3.52807	9.34033	2	24.7761	22.3989	22.3989	13.851	13.851	13.851
Q9Y6M9	NDUFB9	5.67203	9.3431	2	22.9658	23.6505	22.9658	13.851	13.851	13.851
Q9BYC8	MRPL32	5.96337	9.35105	2	23.3843	23.4057	22.816	13.851	13.851	13.851
P60520	GABARAPL2	3.05784	9.39354	2	25.3519	22.1908	22.1908	13.851	13.851	13.851
Q92979	EMG1	5.78694	9.3992	2	23.6799	23.0353	23.0353	13.851	13.851	13.851
Q9NPJ3	ACOT13	4.20069	9.44621	2	22.2218	23.7369	23.9328	13.851	13.851	13.851
P60900	PSMA6	4.96428	9.46936	2	23.4382	23.8556	22.6672	13.851	13.851	13.851
Q9H1E3	NUCKS1	5.19077	9.47935	2	23.9417	23.0246	23.0247	13.851	13.851	13.851
Q9GZR2	REXO4	13.4858	9.51173	2	23.3601	23.3679	23.3601	13.851	13.851	13.851
Q8IXK0	PHC2	6.20938	9.56656	2	23.7604	23.2461	23.2461	13.851	13.851	13.851
P30405	PPIF	7.45327	9.62296	2	23.6424	23.3897	23.3897	13.851	13.851	13.851
Q86U42	PABPN1	7.22135	9.62784	2	23.6664	23.3472	23.4228	13.851	13.851	13.851
O00148	DDX39A	6.28105	9.71108	2	23.3471	23.8909	23.4482	13.851	13.851	13.851
P62314	SNRPD1	2.28667	9.74424	2	25.3547	25.4493	25.249	19.1184	13.851	13.851
Q15836	VAMP3	5.1248	9.78468	2	23.9155	22.9823	24.0092	13.851	13.851	13.851
O75531	BANF1	4.90573	9.87803	2	23.9245	24.2594	23.0031	13.851	13.851	13.851
P12235	SLC25A4	6.50063	9.93692	2	23.5095	23.8275	24.0266	13.851	13.851	13.851
Q9NX55	HYPK	6.32525	10.0467	2	23.5612	24.0523	24.0794	13.851	13.851	13.851
P62318	SNRPD3	6.66641	11.2116	2	25.3696	24.9374	24.8806	13.851	13.851	13.851
P09972	ALDOC	9.04249	13.3223	2	27.2635	27.149	27.1072	13.851	13.851	13.851
Q9H857	NT5DC2	4.06708	1.65358	3	23.5882	23.3104	23.2623	21.71	21.7392	21.7509
Q8IX01	SUGP2	3.48103	1.74742	3	23.4929	23.2707	23.0743	21.4391	21.4391	21.7174
Q9UJS0	SLC25A13	2.23056	1.82766	3	24.8352	24.5003	25.0411	23.5534	22.5462	22.7941
P06730	EIF4E	2.4336	1.88806	3	23.64	24.1172	23.716	21.6477	21.68	22.4812
Q96RQ3	MCCC1	2.65744	1.96701	3	24.4387	23.6842	23.945	22.3834	21.7918	21.9916
O43670	ZNF207	3.97916	2.02784	3	24.7208	24.703	24.7573	22.9612	22.5767	22.5598
O75683	SURF6	2.6299	2.03367	3	23.5311	22.5732	22.8286	20.87	20.87	21.092
Q9BY32	ITPA	3.30409	2.04109	3	24.3487	23.7518	24.3308	22.1531	22.0774	22.0774
Q9NSE4	IARS2	2.3346	2.04424	3	23.7906	23.0712	22.5968	21.0228	21.2804	21.0228
Q01081	U2AF1	2.44464	2.05743	3	24.6435	25.2052	25.3573	22.5356	23.4136	23.0844
Q71DI3	H3C13	3.9418	2.06261	3	33.1871	32.8813	32.9237	30.9406	31.1023	30.7614
P18085	ARF4	2.49922	2.06276	3	23.7366	23.8906	22.853	21.5033	21.3942	21.3942
P08134	RHOC	2.16642	2.08225	3	23.6776	23.9266	24.4154	22.5054	21.9487	21.3188
P63208	SKP1	2.66808	2.12057	3	24.0547	23.5829	23.4391	22.0423	21.2864	21.3864
P52209	PGD	2.97684	2.15794	3	24.0814	23.4457	23.8636	21.4741	21.4587	21.9841
Q04917	YWHAH	2.52021	2.17726	3	23.9063	24.2917	23.2898	21.792	21.855	21.3091
P09651	HNRNPA1	3.09645	2.20531	3	28.8902	28.5428	28.5374	26.8366	26.4111	26.1067
Q8WVX9	FAR1	3.32781	2.21312	3	24.5254	24.7719	24.7351	22.8302	22.1551	22.4077
Q9H3K6	BOLA2	3.76366	2.24087	3	24.9602	24.8457	25.1912	22.7767	22.5231	22.9746
P63000	RAC1	3.03145	2.2499	3	24.8547	24.7357	24.1434	22.511	22.4009	22.0722
Q9Y3U8	RPL36	2.30347	2.25248	3	27.4046	26.1741	27.3389	24.8015	24.6867	24.672
P23588	EIF4B	3.70115	2.26966	3	23.895	23.4251	23.6441	21.288	21.2652	21.602
P62244	RPS15A	3.9903	2.29158	3	27.6062	27.5585	27.3928	25.3593	25.3628	24.9608
P29372	MPG	3.24306	2.34135	3	24.1991	23.4603	23.6093	21.5476	21.3485	21.3485
Q08170	SRSF4	4.34712	2.37387	3	26.7879	27.0574	26.9507	24.3657	24.677	24.6317
Q9NYY8	FASTKD2	3.265	2.42429	3	22.6568	23.3923	22.8039	20.4415	20.697	20.4415
P62081	RPS7	3.9397	2.47392	3	26.4169	26.5586	26.1524	23.9809	24.0479	23.6772
Q9Y2R9	MRPS7	3.07079	2.4924	3	21.3697	22.2464	21.7799	19.3865	19.4496	19.0827
Q8NCA5	FAM98A	3.64542	2.52012	3	23.8575	23.9454	24.058	21.5181	21.0687	21.7136
P62873	GNB1	2.29693	2.54748	3	24.802	23.8583	23.3347	21.6284	21.5812	21.143
P12236	SLC25A6	2.95037	2.55484	3	28.3075	28.1331	27.556	25.4195	25.8101	25.1023
Q01650	SLC7A5	2.19849	2.56654	3	22.9127	24.025	24.137	20.7218	20.9536	21.6996
P35659	DEK	3.6487	2.57677	3	25.0914	24.6871	24.8429	21.9775	22.5358	22.3777
P08754	GNAI3	3.51272	2.57755	3	24.9734	24.9477	24.9153	22.8015	22.0862	22.216
Q8NF37	LPCAT1	3.53095	2.59865	3	22.7664	22.4241	23.1408	20.2454	20.261	20.0291
Q9Y5K5	UCHL5	2.52152	2.62658	3	23.047	23.5174	22.1662	20.4701	20.1259	20.2549
P00390	GSR	4.77556	2.62844	3	23.2644	23.2025	23.108	20.7154	20.5932	20.381
P46778	RPL21	2.3401	2.63535	3	27.1051	27.6253	26.705	24.6866	25.051	23.7917
P11802	CDK4	2.34901	2.64546	3	21.7279	23.2162	22.4035	19.6454	19.6454	20.1203
Q92530	PSMF1	2.69067	2.64926	3	24.2098	23.8962	23.302	20.8275	21.6644	20.9683
Q16576	RBBP7	4.07527	2.65462	3	23.5692	23.1707	23.528	20.6425	20.6883	20.9733
Q9UBF2	COPG2	2.29624	2.66335	3	23.3943	23.2932	21.9819	19.9658	20.249	20.4645
P63173	RPL38	3.09705	2.70391	3	23.8841	23.3054	24.2602	21.2553	21.1705	20.912
Q8WU90	ZC3H15	2.37343	2.70394	3	24.2379	23.8054	22.7752	21.2123	20.7028	20.7916
P42766	RPL35	4.36222	2.70881	3	27.1158	26.9951	26.8816	24.3929	24.4312	24.0419
O95819	MAP4K4	4.30328	2.71351	3	23.5147	23.8078	23.6898	20.7426	21.1534	20.9758
Q6P1L8	MRPL14	4.32057	2.73371	3	23.5171	23.1322	23.076	20.479	20.5974	20.4478
P14174	MIF	3.73956	2.79121	3	26.8271	26.5055	26.5314	24.1939	23.6482	23.6482
P61088	UBE2N	2.70476	2.82048	3	24.6181	24.5979	23.7116	21.9947	21.2116	21.2598
P61803	DAD1	3.70911	2.8442	3	25.1459	24.5868	24.4898	21.8242	21.8242	22.0416
Q13243	SRSF5	2.37271	2.85718	3	24.4328	25.2925	24.9262	21.2105	22.2672	22.6023
Q8IWA0	WDR75	2.15932	2.86639	3	23.5352	22.9187	21.9117	20.5243	19.6211	19.6211
Q53H96	PYCR3	2.70213	2.86701	3	23.7904	23.5337	23.3318	21.2787	20.7884	19.9879
Q9H7B2	RPF2	3.68976	2.88153	3	25.0598	24.6394	24.9441	22.1621	22.2033	21.6333
P30086	PEBP1	3.1138	2.91644	3	26.6134	26.8869	26.5493	24.2659	23.8023	23.2321
O15355	PPM1G	3.01922	2.94999	3	24.6955	25.0254	24.6955	21.5352	21.5352	22.4961
P35611	ADD1	3.60107	2.97012	3	22.5365	23.0687	22.5365	19.5801	19.5801	20.0712
P49755	TMED10	4.13286	2.98113	3	24.619	24.5093	24.3758	21.2945	21.8367	21.4296
P54819	AK2	2.62717	2.98128	3	24.4005	24.3104	23.1401	21.17	20.6653	21.0719
Q14527	HLTF	2.24636	2.98583	3	23.4896	23.317	21.79	20.1112	19.7639	19.7639
P62847	RPS24	2.0462	3.0212	3	26.8603	26.2843	26.0966	23.2058	24.5011	22.4707
Q8TC12	RDH11	2.85624	3.05903	3	24.4397	24.4336	24.3047	22.0886	21.0872	20.8251
Q15637	SF1	2.20981	3.09986	3	24.2168	23.1254	24.6736	20.2363	20.9845	21.4955
P84103	SRSF3	4.32305	3.16824	3	24.9417	25.3934	25.1976	21.9389	22.2193	21.8698
P35268	RPL22	3.15326	3.19039	3	27.4198	27.3989	26.9527	23.8112	24.668	23.7211
Q09028	RBBP4	7.24561	3.22474	3	25.6714	25.6841	25.6626	22.4243	22.5098	22.4098
Q15287	RNPS1	4.67775	3.23056	3	26.7032	26.6882	26.6477	23.7171	23.3805	23.2499
Q53GQ0	HSD17B12	2.84942	3.23075	3	25.472	24.8851	25.3204	22.7063	21.8251	21.4539
Q13595	TRA2A	6.47089	3.33932	3	24.4775	24.3759	24.3622	21.0377	21.0217	21.1381
Q96FW1	OTUB1	3.36942	3.43359	3	24.1574	23.4898	23.8347	19.9284	20.8086	20.4442
Q7L1Q6	BZW1	3.19673	3.43595	3	22.8693	23.0397	23.2092	20.1038	19.7544	18.9522
Q9NZ01	TECR	2.94273	3.44952	3	24.3531	23.0542	24.1307	20.2911	20.6073	20.2911
O95292	VAPB	2.44189	3.52894	3	24.9846	24.8436	23.9078	21.1758	21.789	20.1843
P16403	H1-2	6.07054	3.57448	3	32.5474	32.5484	32.3743	28.9615	28.9457	28.8395
P48735	IDH2	2.48979	3.58749	3	23.7625	22.2594	21.9064	19.0669	19.0495	19.0495
O60884	DNAJA2	4.21034	3.64715	3	24.0419	23.4762	23.5054	20.0333	20.191	19.8577
P63010	AP2B1	2.39501	3.64823	3	25.3594	24.5703	24.9751	22.4594	20.7977	20.703
P13073	COX4I1	2.46806	3.65636	3	24.1028	25.0169	25.0776	20.1281	21.2956	21.8045
Q14019	COTL1	2.89638	3.70201	3	24.4002	24.3494	23.6569	21.2081	20.1233	19.969
P26583	HMGB2	2.17704	3.74405	3	23.0184	24.5027	22.0318	19.6276	19.339	19.3541
Q86V81	ALYREF	2.91706	3.96198	3	26.8164	26.2515	25.5521	22.8483	22.1088	21.7769
O00154	ACOT7	5.19523	4.01272	3	24.189	24.4099	24.0433	20.0606	20.3043	20.239
P84085	ARF5	2.63675	4.06182	3	25.5725	25.4321	25.8706	20.4177	22.1989	22.0731
O75874	IDH1	2.97025	4.2956	3	21.1879	21.6494	22.8336	17.4614	17.4614	17.8613
Q13765	NACA	3.24813	4.6965	3	25.6676	25.8913	25.8767	20.7039	22.0427	20.5995
Q5C9Z4	NOM1	2.57728	4.72509	3	20.0143	22.3359	21.6806	16.4558	16.9439	16.4558
Q96IZ0	PAWR	2.06985	4.7478	3	17.3688	17.8817	20.5459	13.851	13.851	13.851
P35637	FUS	3.40178	5.10951	3	26.7506	26.6835	25.8865	20.6368	21.927	21.4283
O15047	SETD1A	2.3681	5.68013	3	21.4716	18.4447	18.6771	13.851	13.851	13.851
P55011	SLC12A2	6.3551	5.98269	3	19.6866	20.0209	19.7934	13.851	13.851	13.851
Q86UK7	ZNF598	4.79855	6.28307	3	21.7556	21.6518	21.6382	15.9018	15.1473	15.1473
P62995	TRA2B	3.76001	6.43001	3	26.199	26.5338	25.2746	19.9687	19.0048	19.7437
Q8N8S7	ENAH	3.83682	6.48292	3	19.8751	19.8751	21.2515	13.851	13.851	13.851
O00273	DFFA	5.21275	6.62982	3	20.2697	20.903	20.2697	13.851	13.851	13.851
P02786	TFRC	2.48572	6.69601	3	22.6769	19.482	19.482	13.851	13.851	13.851
Q6UXN9	WDR82	2.61119	6.73368	3	18.6192	21.3494	21.7854	13.851	13.851	13.851
Q9H3P7	ACBD3	4.49977	6.75479	3	20.2808	20.2808	21.2556	13.851	13.851	13.851
Q13724	MOGS	2.4358	6.7778	3	21.7617	21.5762	21.8746	13.851	13.851	17.1771
P48147	PREP	11.6042	6.8426	3	20.7046	20.6881	20.6881	13.851	13.851	13.851
O60333	KIF1B	6.87432	6.89392	3	20.6607	20.9134	20.6607	13.851	13.851	13.851
Q9NPH2	ISYNA1	6.33252	6.89589	3	20.6317	20.6317	20.9771	13.851	13.851	13.851
Q9UPN4	CEP131	4.53325	6.99718	3	20.9623	20.2279	21.3542	13.851	13.851	13.851
O14497	ARID1A	4.27393	7.00466	3	21.5878	20.6912	20.2878	13.851	13.851	13.851
P42224	STAT1	2.66771	7.03331	3	19.8848	19.8848	22.8832	13.851	13.851	13.851
Q15398	DLGAP5	3.81108	7.04661	3	21.9101	20.3913	20.3913	13.851	13.851	13.851
P20810	CAST	4.68538	7.09136	3	21.5012	20.4456	20.8802	13.851	13.851	13.851
Q99567	NUP88	5.44138	7.10363	3	20.7564	21.3511	20.7564	13.851	13.851	13.851
Q93050	ATP6V0A1	2.37939	7.13504	3	19.773	19.773	23.412	13.851	13.851	13.851
Q8N3C0	ASCC3	4.87839	7.14733	3	20.9973	21.477	20.5206	13.851	13.851	13.851
Q6PJG6	BRAT1	3.84563	7.15979	3	20.4586	20.5563	22.0174	13.851	13.851	13.851
P82673	MRPS35	2.70593	7.16623	3	20.0224	20.0224	23.0068	13.851	13.851	13.851
Q7Z4Q2	HEATR3	2.69802	7.1685	3	22.3511	19.0615	21.6458	13.851	13.851	13.851
Q5JTV8	TOR1AIP1	2.20013	7.20602	3	22.3765	22.5345	22.3765	13.851	17.9676	13.851
Q9NZJ4	SACS	4.64679	7.24528	3	20.7762	21.7364	20.7762	13.851	13.851	13.851
Q9Y4W6	AFG3L2	5.07093	7.3226	3	20.9205	21.6797	20.9205	13.851	13.851	13.851
Q92614	MYO18A	3.61318	7.33668	3	20.3253	22.3214	20.9162	13.851	13.851	13.851
Q16555	DPYSL2	4.28083	7.36158	3	20.8104	20.8104	22.0168	13.851	13.851	13.851
Q9UL54	TAOK2	6.35883	7.41109	3	21.5058	21.1402	21.1402	13.851	13.851	13.851
Q9UJU6	DBNL	4.43076	7.45859	3	20.9361	20.9361	22.0565	13.851	13.851	13.851
P55735	SEC13	2.73526	7.4604	3	23.2138	19.7359	20.9844	13.851	13.851	13.851
Q02952	AKAP12	5.28869	7.55343	3	21.1742	21.8648	21.1742	13.851	13.851	13.851
Q7L7X3	TAOK1	3.14013	7.56012	3	20.5344	23.0236	20.6752	13.851	13.851	13.851
Q9H0H0	INTS2	4.54597	7.5884	3	21.4491	20.819	22.05	13.851	13.851	13.851
O43847	NRDC	3.39803	7.66162	3	22.9163	20.8107	20.8107	13.851	13.851	13.851
Q7Z4H3	HDDC2	4.63045	7.70625	3	22.239	21.292	21.1407	13.851	13.851	13.851
Q9NZM5	NOP53	4.04739	7.73261	3	22.5502	21.1415	21.0591	13.851	13.851	13.851
Q9UBQ0	VPS29	4.56775	7.76325	3	22.1895	20.9545	21.6987	13.851	13.851	13.851
Q14573	ITPR3	6.02371	7.7714	3	21.4674	21.4674	21.9324	13.851	13.851	13.851
Q8IYB8	SUPV3L1	3.12358	7.79368	3	21.4389	23.1924	20.3026	13.851	13.851	13.851
Q96K17	BTF3L4	5.84981	7.79632	3	21.5982	21.9665	21.3771	13.851	13.851	13.851
Q5JSL3	DOCK11	3.75628	7.81867	3	21.0896	22.8297	21.0896	13.851	13.851	13.851
P21266	GSTM3	4.04943	7.82663	3	22.656	21.1884	21.1884	13.851	13.851	13.851
Q96HC4	PDLIM5	5.57366	7.84823	3	22.105	21.4963	21.4963	13.851	13.851	13.851
Q9BSH4	TACO1	3.2116	7.85944	3	20.1503	22.8295	22.1515	13.851	13.851	13.851
Q66K74	MAP1S	3.36688	7.88747	3	21.0024	23.2105	21.0024	13.851	13.851	13.851
O75955	FLOT1	3.81429	7.89759	3	22.8812	21.1822	21.1822	13.851	13.851	13.851
Q5JTZ9	AARS2	4.6569	7.9135	3	21.0694	22.1115	22.1125	13.851	13.851	13.851
Q9UK61	TASOR	5.21122	7.95758	3	22.1258	21.3072	21.9926	13.851	13.851	13.851
Q9NQT5	EXOSC3	4.80564	7.963	3	22.2184	22.0433	21.1803	13.851	13.851	13.851
P0DPB6	POLR1D	3.3254	7.98914	3	20.3978	22.1241	22.9984	13.851	13.851	13.851
O60885	BRD4	4.86546	7.98947	3	21.2187	22.1641	22.1386	13.851	13.851	13.851
A6NDG6	PGP	3.50055	7.99012	3	23.219	21.1521	21.1521	13.851	13.851	13.851
P00568	AK1	3.03829	7.99321	3	20.037	22.6076	22.888	13.851	13.851	13.851
Q6PI48	DARS2	5.2351	7.99579	3	22.3494	21.5954	21.5954	13.851	13.851	13.851
Q8N3U4	STAG2	4.2026	8.02113	3	20.9909	22.5329	22.0925	13.851	13.851	13.851
P30837	ALDH1B1	3.75464	8.03029	3	22.7082	20.7235	22.2121	13.851	13.851	13.851
P15374	UCHL3	10.7247	8.04304	3	21.8833	21.9154	21.8833	13.851	13.851	13.851
Q8N5C6	SRBD1	5.58582	8.05414	3	21.5176	22.224	21.9736	13.851	13.851	13.851
P17252	PRKCA	6.04839	8.06177	3	21.6625	22.2064	21.8693	13.851	13.851	13.851
O43396	TXNL1	5.57383	8.06863	3	21.8056	21.6291	22.3241	13.851	13.851	13.851
O60563	CCNT1	5.57662	8.08026	3	21.7227	21.7227	22.3483	13.851	13.851	13.851
Q96KG9	SCYL1	3.96311	8.09135	3	22.0907	20.9559	22.7803	13.851	13.851	13.851
Q9NR12	PDLIM7	8.01479	8.12158	3	22.0065	22.0397	21.8714	13.851	13.851	13.851
Q96DV4	MRPL38	4.08044	8.13109	3	22.9775	21.4199	21.5488	13.851	13.851	13.851
O43719	HTATSF1	4.78361	8.1354	3	21.9767	22.5662	21.4162	13.851	13.851	13.851
O75521	ECI2	4.59101	8.156	3	21.6349	21.6349	22.7512	13.851	13.851	13.851
P51956	NEK3	5.18262	8.15961	3	21.5467	22.4623	22.0227	13.851	13.851	13.851
P15927	RPA2	5.51741	8.16747	3	22.3671	22.0712	21.617	13.851	13.851	13.851
O00629	KPNA4	3.27677	8.1913	3	23.6029	21.614	20.91	13.851	13.851	13.851
P49815	TSC2	4.73515	8.20414	3	22.0233	21.4753	22.6668	13.851	13.851	13.851
P08574	CYC1	10.5474	8.2123	3	22.0512	22.0875	22.0512	13.851	13.851	13.851
Q96T23	RSF1	4.09637	8.22897	3	22.579	22.5818	21.079	13.851	13.851	13.851
O95251	KAT7	5.40548	8.23138	3	22.5513	21.8514	21.8443	13.851	13.851	13.851
Q9HAV7	GRPEL1	2.49782	8.23308	3	24.0753	22.5351	19.6418	13.851	13.851	13.851
P55196	AFDN	3.98475	8.26626	3	23.1903	21.5807	21.5807	13.851	13.851	13.851
Q12792	TWF1	3.98625	8.28139	3	21.0953	22.4088	22.893	13.851	13.851	13.851
P03915	MT-ND5	7.05682	8.28634	3	22.3196	22.0436	22.0488	13.851	13.851	13.851
Q92797	SYMPK	4.14054	8.2876	3	21.2226	22.2888	22.9043	13.851	13.851	13.851
P12814	ACTN1	3.72551	8.28899	3	21.4215	23.3875	21.6109	13.851	13.851	13.851
Q96DT7	ZBTB10	4.48014	8.2901	3	21.6591	22.9423	21.8219	13.851	13.851	13.851
P78406	RAE1	3.51391	8.33968	3	20.8352	23.2545	22.4822	13.851	13.851	13.851
Q9BS26	ERP44	4.77609	8.40239	3	22.2969	22.8269	21.6363	13.851	13.851	13.851
Q9NYU2	UGGT1	8.16179	8.41785	3	22.2198	22.3668	22.2198	13.851	13.851	13.851
Q9UNS2	COPS3	5.89261	8.43693	3	22.1064	22.6509	22.1064	13.851	13.851	13.851
P20618	PSMB1	3.72023	8.44309	3	23.5736	21.6543	21.6543	13.851	13.851	13.851
Q16740	CLPP	3.04504	8.48702	3	24.2567	21.3786	21.3786	13.851	13.851	13.851
A1X283	SH3PXD2B	6.30865	8.50648	3	22.2268	22.645	22.2005	13.851	13.851	13.851
O15446	POLR1G	5.42685	8.52974	3	22.8607	22.1407	22.1407	13.851	13.851	13.851
O96028	NSD2	3.58083	8.53564	3	21.0202	22.7906	23.3491	13.851	13.851	13.851
O14745	NHERF1	5.95947	8.5771	3	22.2506	22.7831	22.2506	13.851	13.851	13.851
Q8WWK9	CKAP2	4.10744	8.60269	3	22.9646	22.9823	21.414	13.851	13.851	13.851
Q7L8L6	FASTKD5	4.57978	8.61811	3	21.8367	23.1976	22.373	13.851	13.851	13.851
Q06787	FMR1	4.12076	8.61841	3	21.9526	21.9526	23.5029	13.851	13.851	13.851
Q9Y2T2	AP3M1	3.34569	8.62207	3	23.7102	20.9361	22.7728	13.851	13.851	13.851
Q96ST3	SIN3A	4.78832	8.6728	3	22.8805	21.8178	22.873	13.851	13.851	13.851
P10515	DLAT	5.5004	8.67787	3	22.9969	22.2948	22.2948	13.851	13.851	13.851
O60313	OPA1	7.80776	8.70017	3	22.5632	22.6522	22.4381	13.851	13.851	13.851
P37198	NUP62	7.80652	8.70589	3	22.4947	22.6812	22.4947	13.851	13.851	13.851
Q9UQR0	SCML2	6.80825	8.72077	3	22.3565	22.7241	22.6346	13.851	13.851	13.851
P82970	HMGN5	4.07824	8.72274	3	23.4939	21.6369	22.5904	13.851	13.851	13.851
P15170	GSPT1	4.63657	8.75271	3	23.3708	22.1084	22.3318	13.851	13.851	13.851
P84095	RHOG	5.6597	8.80287	3	23.0414	22.6277	22.2925	13.851	13.851	13.851
Q9Y697	NFS1	4.91153	8.80913	3	23.2033	22.7247	22.0523	13.851	13.851	13.851
P53701	HCCS	3.97473	8.83942	3	22.7367	23.666	21.6684	13.851	13.851	13.851
Q5TDH0	DDI2	9.37017	8.85292	3	22.7553	22.6782	22.6782	13.851	13.851	13.851
P31150	GDI1	4.25951	8.86849	3	22.729	21.8651	23.5642	13.851	13.851	13.851
Q8TCT9	HM13	3.73788	8.90337	3	23.6065	23.2187	21.4379	13.851	13.851	13.851
P49419	ALDH7A1	5.30938	8.93609	3	22.6925	23.2932	22.3755	13.851	13.851	13.851
Q9BW92	TARS2	4.24891	8.95151	3	23.7988	22.3043	22.3043	13.851	13.851	13.851
Q01968	OCRL	6.02317	8.95437	3	23.1626	22.6267	22.6267	13.851	13.851	13.851
Q96SK2	TMEM209	8.01058	8.98867	3	22.9538	22.7826	22.7826	13.851	13.851	13.851
Q9Y570	PPME1	4.35595	8.99224	3	23.7837	22.373	22.373	13.851	13.851	13.851
Q15361	TTF1	11.5908	8.99903	3	22.8427	22.8427	22.8646	13.851	13.851	13.851
O75832	PSMD10	6.03951	9.02136	3	22.5259	23.1187	22.9724	13.851	13.851	13.851
O00425	IGF2BP3	4.0656	9.06063	3	23.4292	21.7907	23.515	13.851	13.851	13.851
P42126	ECI1	7.7846	9.08456	3	23.067	22.8698	22.8698	13.851	13.851	13.851
P35241	RDX	6.89781	9.0934	3	22.8348	22.8348	23.1636	13.851	13.851	13.851
Q01469	FABP5	4.77336	9.10023	3	22.5776	23.6984	22.5776	13.851	13.851	13.851
Q96A35	MRPL24	7.48901	9.10035	3	23.1074	22.8733	22.8733	13.851	13.851	13.851
P43686	PSMC4	3.77052	9.14146	3	24.123	23.0583	21.796	13.851	13.851	13.851
Q8TAQ2	SMARCC2	6.8603	9.14665	3	23.2229	22.885	22.885	13.851	13.851	13.851
Q12849	GRSF1	7.42206	9.14694	3	22.9638	23.153	22.8769	13.851	13.851	13.851
O00566	MPHOSPH10	4.58714	9.20538	3	22.6829	22.5897	23.8965	13.851	13.851	13.851
Q12893	TMEM115	4.89396	9.24851	3	23.8076	22.7454	22.7454	13.851	13.851	13.851
P16989	YBX3	4.73313	9.27322	3	22.922	22.5735	23.8771	13.851	13.851	13.851
Q99805	TM9SF2	5.46713	9.31441	3	23.6711	22.9827	22.8423	13.851	13.851	13.851
P36957	DLST	5.85879	9.33233	3	23.4442	23.3261	22.7796	13.851	13.851	13.851
O14744	PRMT5	3.74016	9.33307	3	23.9864	21.7915	23.7742	13.851	13.851	13.851
P45973	CBX5	5.90624	9.40256	3	23.5559	22.8738	23.3309	13.851	13.851	13.851
Q6DD88	ATL3	6.24947	9.41054	3	23.4171	22.9321	23.4353	13.851	13.851	13.851
P82912	MRPS11	5.61567	9.41556	3	23.6114	23.3772	22.811	13.851	13.851	13.851
P43034	PAFAH1B1	6.14911	9.53861	3	23.2544	23.7405	23.1739	13.851	13.851	13.851
Q9UNQ2	DIMT1	5.27872	9.54893	3	23.9853	23.1072	23.1072	13.851	13.851	13.851
A1L0T0	ILVBL	4.06148	9.55529	3	23.6977	22.2648	24.2562	13.851	13.851	13.851
Q9HC07	TMEM165	3.98621	9.55884	3	24.6491	22.7584	22.8219	13.851	13.851	13.851
Q96I99	SUCLG2	5.71274	9.61091	3	23.0899	23.8803	23.4154	13.851	13.851	13.851
Q01831	XPC	4.27308	9.68471	3	23.5897	24.428	22.5894	13.851	13.851	13.851
Q96A72	MAGOHB	4.25636	9.7521	3	23.6134	24.5338	22.662	13.851	13.851	13.851
Q9UBT2	UBA2	5.57146	9.86402	3	24.1768	23.6728	23.2953	13.851	13.851	13.851
P25787	PSMA2	5.84019	10.0361	3	24.3321	23.6646	23.6646	13.851	13.851	13.851
P67775	PPP2CA	7.0947	10.1036	3	24.172	23.8458	23.8458	13.851	13.851	13.851
Q9Y2P8	RCL1	7.00231	10.1792	3	23.9146	24.2612	23.9146	13.851	13.851	13.851
P42285	MTREX	6.35107	10.4553	3	24.6476	24.1812	24.0901	13.851	13.851	13.851
P22061	PCMT1	2.4282	1.29942	4	25.2706	24.7545	25.0567	23.8705	23.4216	23.8914
O75947	ATP5PD	3.60492	1.57754	4	24.4375	24.2468	24.0956	22.8053	22.7127	22.5293
P63220	RPS21	2.83639	1.72742	4	26.0626	25.5384	25.7828	24.3281	23.7715	24.1019
Q9NXE4	SMPD4	2.1772	1.84143	4	23.3145	22.3145	22.3349	20.6793	21.081	20.6793
Q15008	PSMD6	2.4093	1.85768	4	23.9562	24.529	24.1132	22.4957	22.6924	21.8373
Q3ZCQ8	TIMM50	2.39919	1.9959	4	25.2631	25.3145	24.6997	23.5694	23.0899	22.6302
O75390	CS	2.73447	2.08305	4	25.5959	24.7905	25.5601	23.247	23.038	23.4123
O00203	AP3B1	3.78713	2.10075	4	23.4756	22.986	23.1814	21.0572	21.0572	21.2265
Q12768	WASHC5	3.27284	2.13078	4	22.7309	22.8749	23.4203	20.8672	20.8672	20.8995
Q96P16	RPRD1A	2.03025	2.17614	4	23.6196	23.6092	23.1751	21.6292	20.4202	21.8261
Q13206	DDX10	3.09382	2.23571	4	23.9826	24.0026	23.4759	21.8742	21.2703	21.6095
P62854	RPS26	3.95842	2.25025	4	29.3073	28.9247	28.9578	26.9321	26.6514	26.8556
Q9BXS5	AP1M1	3.78752	2.27192	4	23.7526	23.8883	24.291	21.6701	21.776	21.6701
P19105	MYL12A	4.13104	2.30399	4	24.3288	24.2389	24.3537	21.9282	22.2613	21.8199
Q5T9A4	ATAD3B	4.11463	2.31118	4	24.9692	25.0825	24.8812	22.7522	22.8293	22.4179
P11413	G6PD	2.18464	2.31471	4	23.0656	24.0464	23.0331	20.7704	20.7704	21.6602
Q13330	MTA1	2.47232	2.32149	4	23.3331	23.428	22.5663	20.3686	21.2439	20.7504
P60660	MYL6	3.56478	2.34456	4	25.3578	25.5534	25.498	23.3853	22.7654	23.2247
O95433	AHSA1	3.93932	2.36991	4	24.1393	24.0205	24.2036	22.0484	21.6026	21.6026
P15531	NME1	4.63556	2.3722	4	29.1587	29.0351	28.9338	26.829	26.5487	26.6333
Q9UBU9	NXF1	2.52535	2.40484	4	23.0319	23.5252	23.8456	20.7742	21.6398	20.7742
Q9UNM6	PSMD13	3.24719	2.43502	4	23.3802	23.488	23.5819	21.0288	21.4681	20.6482
P61619	SEC61A1	3.01171	2.4669	4	26.3575	25.7221	25.4332	23.5208	23.2477	23.3435
P55769	SNU13	3.68251	2.48815	4	25.2187	24.6024	24.8859	22.457	22.5149	22.2706
O43837	IDH3B	3.30247	2.49559	4	23.286	22.6576	22.9406	20.3061	20.3061	20.7852
P62899	RPL31	3.23379	2.50855	4	27.03	26.2545	26.3058	24.0621	23.9447	24.058
Q9H910	JPT2	2.91219	2.52407	4	23.4772	23.7495	23.3397	21.56	20.7965	20.6378
Q9NVN8	GNL3L	2.57633	2.52995	4	25.4235	24.139	24.8438	22.4358	22.1791	22.2016
Q9NX20	MRPL16	2.63831	2.56945	4	23.8542	23.9078	22.8175	20.8461	21.179	20.8461
Q99570	PIK3R4	2.65827	2.57065	4	23.5208	22.2879	22.7319	20.2054	20.2054	20.4179
P23284	PPIB	3.75513	2.58118	4	26.0208	26.0094	26.0064	23.7139	23.5134	23.0658
P43897	TSFM	4.67678	2.62227	4	24.5839	24.8241	24.8156	22.2834	22.0367	22.0367
P39656	DDOST	2.66319	2.64883	4	24.7903	24.64	24.0918	21.6881	22.4639	21.4237
P61513	RPL37A	2.93855	2.66461	4	26.4565	27.0905	26.0123	23.781	23.9999	23.7846
Q9BVI4	NOC4L	3.44836	2.70951	4	23.9577	24.2852	23.8349	21.5341	20.917	21.4981
Q15645	TRIP13	3.41163	2.72558	4	24.2583	24.1423	23.9427	21.422	20.975	21.7694
Q15366	PCBP2	3.08525	2.7595	4	27.837	27.6446	27.2612	25.1885	24.9398	24.3359
Q9Y3A4	RRP7A	2.75592	2.80161	4	25.3683	24.8304	24.826	22.845	21.7324	22.0425
P53985	SLC16A1	2.92297	2.80322	4	26.3427	26.2677	25.8515	22.7474	23.5759	23.729
P61353	RPL27	3.66315	2.8353	4	27.3641	27.6358	27.3786	24.3193	25.0111	24.5421
Q9BU76	MMTAG2	2.70764	2.85178	4	24.3078	23.8849	23.3019	21.514	20.7126	20.7126
Q71UI9	H2AZ2	3.79507	2.85251	4	29.4804	29.3015	28.8747	26.5248	26.3998	26.1744
P51148	RAB5C	2.79663	2.85978	4	25.1285	24.882	25.0579	22.3285	21.4585	22.702
P83731	RPL24	7.88526	2.87193	4	29.1411	29.1852	29.1985	26.286	26.3173	26.3056
Q9P035	HACD3	2.92709	2.90506	4	26.3575	26.5908	25.903	23.7041	23.6297	22.8024
P09622	DLD	2.93418	2.94273	4	24.3072	23.4136	23.1767	20.6006	20.8682	20.6006
Q15185	PTGES3	2.57421	2.94333	4	25.0801	25.8325	25.1236	22.8261	22.7151	21.665
Q13838	DDX39B	4.49831	2.94973	4	27.3083	26.9445	26.8918	24.0102	24.0857	24.1995
P55084	HADHB	3.04362	2.95805	4	23.383	23.9298	23.8173	20.2188	21.2171	20.82
Q96EY1	DNAJA3	3.09691	2.96023	4	24.261	24.3611	24.6907	21.1801	22.0719	21.1801
P15311	EZR	3.40014	2.98861	4	24.7274	24.8496	24.8073	21.6693	22.3289	21.4202
P54578	USP14	2.44794	3.05285	4	22.8986	23.3865	24.3198	20.7694	19.9409	20.736
P24534	EEF1B2	2.27682	3.05609	4	26.9143	25.5542	26.0355	23.8661	22.8763	22.5934
O95861	BPNT1	3.02215	3.09603	4	23.0231	24.1273	23.9123	20.7109	20.376	20.6877
O00505	KPNA3	2.76684	3.09877	4	24.3557	22.97	23.3457	20.4345	20.4345	20.506
Q49A26	GLYR1	2.91272	3.10873	4	23.166	22.5625	23.8055	20.3225	19.9426	19.9426
O43747	AP1G1	2.49316	3.11552	4	23.2731	23.6028	24.2216	21.0284	20.9525	19.77
P49006	MARCKSL1	3.54566	3.11666	4	23.4238	22.9069	23.5838	19.8814	20.2432	20.44
P43487	RANBP1	3.22244	3.16168	4	26.29	25.8391	26.0182	22.7265	22.479	23.4568
Q05519	SRSF11	2.07268	3.16909	4	25.3789	25.0007	24.8484	23.1717	21.4047	21.1444
P24752	ACAT1	2.38085	3.30408	4	23.6415	24.4239	25.0471	20.5451	20.833	21.8222
P46783	RPS10	2.59916	3.44806	4	24.8839	26.1521	26.5664	22.5504	22.3055	22.4024
Q13618	CUL3	4.14521	3.50746	4	23.4451	23.6131	23.3066	20.3224	19.76	19.76
P61289	PSME3	2.25551	3.60965	4	24.1429	24.5296	24.5894	20.108	22.1073	20.2176
P84090	ERH	2.60533	3.6169	4	26.0992	25.8926	25.7975	21.2634	22.9147	22.7605
Q13242	SRSF9	3.65853	3.85573	4	22.4645	23.2486	22.2685	18.7162	18.8697	18.8285
Q15459	SF3A1	4.32601	3.87276	4	24.6477	24.3435	24.221	20.7443	20.6372	20.2124
P52907	CAPZA1	3.69164	3.90926	4	24.0707	24.8885	25.0382	20.7933	20.7382	20.7382
O75940	SMNDC1	3.50526	3.92646	4	24.5492	23.9755	23.8491	20.7181	19.9382	19.9382
P52815	MRPL12	3.21325	3.98349	4	25.2362	24.4693	24.3178	21.2741	20.3994	20.3994
Q92688	ANP32B	3.5094	4.01068	4	24.6448	24.4472	24.3828	21.0239	20.549	19.8699
Q96QU8	XPO6	4.33566	4.20459	4	22.2502	22.9651	22.8022	18.5719	18.414	18.4178
Q16527	CSRP2	2.97595	4.25341	4	24.2653	23.2382	24.0827	18.9956	19.5011	20.3293
P51572	BCAP31	2.76662	4.51266	4	23.3926	25.1746	24.9421	19.9157	19.6399	20.4157
P23526	AHCY	3.53432	4.51967	4	25.8993	25.7097	25.7076	21.0596	21.9797	20.7183
P83881	RPL36A	5.01984	4.67222	4	27.5936	27.0775	27.4483	22.7793	22.7487	22.5748
O14818	PSMA7	3.43318	5.55539	4	25.4103	25.546	24.7927	19.253	20.5768	19.253
Q92522	H1-10	4.00261	5.58684	4	26.9628	26.6587	25.8196	20.7679	21.1111	20.8015
P54132	BLM	6.88197	6.67181	4	20.6851	20.4416	20.4416	13.851	13.851	13.851
O00139	KIF2A	2.10113	6.70544	4	22.4032	22.2499	20.8096	13.851	13.851	17.6444
P50579	METAP2	2.24157	6.70861	4	22.4277	21.0508	18.2002	13.851	13.851	13.851
Q8IY67	RAVER1	2.06151	6.73353	4	20.8122	22.8949	18.0464	13.851	13.851	13.851
Q14781	CBX2	4.62674	6.90673	4	21.3659	20.3621	20.5451	13.851	13.851	13.851
Q14997	PSME4	3.09497	7.05228	4	22.4506	20.1296	20.1296	13.851	13.851	13.851
Q13409	DYNC1I2	5.29915	7.11084	4	21.3926	20.7464	20.7464	13.851	13.851	13.851
Q8IZL8	PELP1	3.64666	7.14419	4	20.4299	20.4299	22.1256	13.851	13.851	13.851
Q8IXT5	RBM12B	3.68072	7.21606	4	21.1309	22.6093	22.6835	15.4049	14.6853	14.6853
Q13136	PPFIA1	3.31964	7.22749	4	22.3522	20.9172	19.9659	13.851	13.851	13.851
Q9UBD5	ORC3	5.22267	7.2464	4	23.2329	22.4907	22.6175	15.524	15.554	15.524
P13861	PRKAR2A	5.15652	7.31417	4	20.8578	20.9982	21.6395	13.851	13.851	13.851
O95140	MFN2	4.65135	7.40732	4	20.6076	21.5386	21.6286	13.851	13.851	13.851
P21359	NF1	3.55436	7.49586	4	20.6454	20.7991	22.596	13.851	13.851	13.851
Q8N5F7	NKAP	3.49132	7.54783	4	22.7075	20.7444	20.7444	13.851	13.851	13.851
Q03164	KMT2A	4.83089	7.57725	4	21.6686	20.8303	21.7858	13.851	13.851	13.851
Q13557	CAMK2D	3.83703	7.77743	4	22.6645	20.7887	21.432	13.851	13.851	13.851
P42356	PI4KA	3.46235	7.80021	4	22.4186	22.2564	20.2785	13.851	13.851	13.851
P35269	GTF2F1	6.37201	7.84791	4	21.8613	21.4462	21.7892	13.851	13.851	13.851
Q9H5V9	STEEP1	8.41176	7.91096	4	21.8409	21.732	21.7128	13.851	13.851	13.851
Q12872	SFSWAP	4.68235	7.96858	4	22.3386	21.9533	21.1667	13.851	13.851	13.851
O14974	PPP1R12A	3.99478	8.05098	4	21.1899	21.6026	22.9133	13.851	13.851	13.851
Q8WUA2	PPIL4	2.90973	8.10622	4	22.8509	23.0484	19.9722	13.851	13.851	13.851
Q9NUQ7	UFSP2	4.42198	8.1127	4	22.7726	21.463	21.6554	13.851	13.851	13.851
Q9NWT1	PAK1IP1	3.95978	8.11882	4	21.4351	21.4351	23.0392	13.851	13.851	13.851
O95747	OXSR1	5.2755	8.23186	4	21.7015	22.561	21.986	13.851	13.851	13.851
P09884	POLA1	3.86349	8.24352	4	23.2381	21.6163	21.4291	13.851	13.851	13.851
P06737	PYGL	2.95819	8.24902	4	24.0526	20.9334	21.314	13.851	13.851	13.851
Q8N122	RPTOR	3.65217	8.2593	4	23.3938	21.2755	21.6616	13.851	13.851	13.851
P57740	NUP107	3.81535	8.30327	4	22.0918	21.1562	23.2147	13.851	13.851	13.851
A0FGR8	ESYT2	3.5486	8.43021	4	23.5207	21.0737	22.2491	13.851	13.851	13.851
Q8WXI9	GATAD2B	5.35444	8.46631	4	21.891	22.3095	22.7514	13.851	13.851	13.851
P00491	PNP	4.26146	8.47581	4	22.3884	21.4867	23.1052	13.851	13.851	13.851
P47755	CAPZA2	4.7782	8.49521	4	21.7611	22.3131	22.9644	13.851	13.851	13.851
Q8TCS8	PNPT1	6.70363	8.50903	4	22.3957	22.1459	22.5384	13.851	13.851	13.851
Q99549	MPHOSPH8	4.4171	8.53048	4	21.5213	22.7778	22.8452	13.851	13.851	13.851
Q96F86	EDC3	5.0575	8.53744	4	22.6253	22.7424	21.7975	13.851	13.851	13.851
Q8N201	INTS1	3.60948	8.70231	4	23.6979	22.6901	21.2717	13.851	13.851	13.851
P49189	ALDH9A1	4.18214	8.76541	4	23.6076	22.3068	21.9348	13.851	13.851	13.851
O95336	PGLS	4.72786	8.78019	4	21.9045	23.1162	22.8728	13.851	13.851	13.851
Q15020	SART3	2.70762	8.78165	4	24.306	23.3284	20.2634	13.851	13.851	13.851
O60306	AQR	5.46888	8.81349	4	23.0425	22.7374	22.2135	13.851	13.851	13.851
Q15019	SEPTIN2	6.7608	8.82124	4	22.7488	22.446	22.8218	13.851	13.851	13.851
Q15369	ELOC	2.0576	8.83917	4	25.2575	24.4176	23.7912	13.851	13.851	19.2469
Q9BSJ2	TUBGCP2	6.02264	8.86445	4	22.5026	23.0666	22.5771	13.851	13.851	13.851
Q9UNZ2	NSFL1C	5.94843	8.90865	4	23.073	22.7752	22.4307	13.851	13.851	13.851
O75822	EIF3J	3.60215	8.91428	4	23.8404	23.0676	21.3877	13.851	13.851	13.851
O75165	DNAJC13	5.57523	8.9718	4	22.5782	22.6041	23.286	13.851	13.851	13.851
Q6Y7W6	GIGYF2	7.62138	8.98969	4	22.7146	22.8455	22.9619	13.851	13.851	13.851
P36871	PGM1	7.51546	8.99306	4	22.8731	22.7004	22.9586	13.851	13.851	13.851
P27105	STOM	3.51887	9.03915	4	21.4221	23.2154	24.0329	13.851	13.851	13.851
Q8NFW8	CMAS	7.04211	9.06512	4	22.9796	23.0496	22.7191	13.851	13.851	13.851
Q05655	PRKCD	4.03174	9.09982	4	21.8397	23.2517	23.761	13.851	13.851	13.851
Q9UMX0	UBQLN1	3.40044	9.18863	4	24.4387	23.1472	21.5329	13.851	13.851	13.851
O43159	RRP8	4.4184	9.18876	4	23.4923	22.113	23.5139	13.851	13.851	13.851
Q6YN16	HSDL2	4.47343	9.21431	4	23.9654	22.6152	22.6152	13.851	13.851	13.851
Q07864	POLE	6.88399	9.30725	4	23.343	23.1788	22.9529	13.851	13.851	13.851
Q9UKY7	CDV3	7.51325	9.39374	4	23.3665	23.0955	23.2721	13.851	13.851	13.851
Q9BRJ6	CHLSN	4.069	9.46753	4	24.4611	22.5289	22.9654	13.851	13.851	13.851
O15258	RER1	6.57627	9.47863	4	23.1008	23.5761	23.3119	13.851	13.851	13.851
Q86VM9	ZC3H18	3.19429	9.50185	4	24.2175	23.9819	24.7307	13.851	13.851	16.7225
Q96CX2	KCTD12	7.06836	9.60677	4	23.4373	23.287	23.6489	13.851	13.851	13.851
P23381	WARS1	5.17106	9.62723	4	23.2451	23.0897	24.0998	13.851	13.851	13.851
Q13561	DCTN2	6.60695	9.77778	4	23.7189	23.3553	23.8121	13.851	13.851	13.851
Q8TEM1	NUP210	2.81559	9.81531	4	26.215	22.3919	22.3919	13.851	13.851	13.851
Q9Y285	FARSA	5.25568	9.81854	4	24.2637	23.253	23.4918	13.851	13.851	13.851
P41227	NAA10	7.03013	9.83923	4	23.9098	23.589	23.5718	13.851	13.851	13.851
Q16531	DDB1	5.55935	9.87037	4	23.6607	23.3091	24.1942	13.851	13.851	13.851
P68036	UBE2L3	4.95611	10.1712	4	24.7734	23.6465	23.6465	13.851	13.851	13.851
Q92734	TFG	6.61066	10.2599	4	23.9777	23.9525	24.4023	13.851	13.851	13.851
Q01813	PFKP	6.40815	10.3528	4	24.3344	24.4017	23.8751	13.851	13.851	13.851
O14737	PDCD5	6.27127	10.5793	4	24.4229	24.7507	24.1171	13.851	13.851	13.851
O43264	ZW10	2.12439	1.58272	5	22.4513	22.5623	22.9289	20.6738	21.6123	20.9082
Q13642	FHL1	4.67328	1.65929	5	25.525	25.4649	25.3253	23.8416	23.7947	23.701
P39748	FEN1	3.02022	1.72467	5	25.5141	25.4578	24.9429	23.5433	23.7306	23.4669
Q9NZB2	FAM120A	2.15847	1.78889	5	23.6177	23.3483	23.7158	21.1067	22.1012	22.1072
P08243	ASNS	2.57656	1.79247	5	24.2763	23.4859	23.8374	22.2409	21.7904	22.1909
P62191	PSMC1	4.04	1.82891	5	24.8374	25.1934	24.8808	23.1164	23.192	23.1164
O94905	ERLIN2	3.52239	1.94883	5	25.2081	25.0797	25.6014	23.2423	23.3814	23.419
P31942	HNRNPH3	2.36848	2.02129	5	25.6979	25.001	24.6076	23.334	23.033	22.8756
P47756	CAPZB	2.88234	2.04935	5	23.2905	23.9384	24.1251	21.7026	21.8084	21.695
Q9NUU7	DDX19A	2.49145	2.09855	5	24.1679	24.2673	23.8326	22.6005	21.7178	21.6538
P62913	RPL11	2.7156	2.17643	5	27.799	27.5227	28.0284	25.3623	25.3272	26.1312
P30050	RPL12	3.29106	2.20604	5	27.8448	27.2959	27.2911	25.491	25.1218	25.2009
P50914	RPL14	4.35283	2.33461	5	28.9305	28.6095	28.5726	26.457	26.3457	26.3061
Q9H9B4	SFXN1	2.59832	2.35057	5	25.5762	26.199	25.9154	23.0651	24.093	23.4809
P55036	PSMD4	2.31503	2.35325	5	25.1898	24.8775	24.2301	23.0119	22.004	22.2218
P25398	RPS12	2.44349	2.40052	5	27.0958	26.7902	26.7075	23.7166	24.8522	24.8231
P26038	MSN	2.8076	2.41254	5	26.1608	25.6318	25.1248	23.2683	23.3717	23.0398
O60216	RAD21	2.13129	2.41955	5	23.5218	23.0622	21.9454	20.3082	20.3082	20.6544
P00387	CYB5R3	4.29506	2.41998	5	25.5776	25.7294	25.5529	23.031	23.4294	23.1394
P36542	ATP5F1C	3.07836	2.46289	5	24.5974	25.4515	25.03	22.7798	22.532	22.3784
P39019	RPS19	2.75633	2.463	5	25.0798	25.7566	25.2991	23.3581	22.9463	22.442
Q5T8P6	RBM26	2.39546	2.50285	5	24.0019	23.7317	23.0835	20.8304	21.7428	20.7352
O15347	HMGB3	2.07539	2.50861	5	24.3644	25.5054	25.5219	21.9583	22.7648	23.1426
P27695	APEX1	2.04683	2.51488	5	25.2922	24.4085	23.7294	22.4794	21.8654	21.5407
P78347	GTF2I	2.9288	2.59837	5	24.3367	24.3903	24.324	21.2234	22.3111	21.7216
O76003	GLRX3	2.73475	2.60039	5	24.3448	24.262	25.1542	21.5807	22.0856	22.2935
P57088	TMEM33	2.72326	2.61517	5	25.9372	25.74	24.8277	22.8263	23.101	22.7322
P82933	MRPS9	2.24961	2.62227	5	22.7333	23.6536	24.0003	21.2163	21.062	20.242
Q13347	EIF3I	3.06165	2.6323	5	23.9181	24.2726	23.6483	21.69	20.8887	21.3634
P10599	TXN	3.59664	2.6544	5	28.2524	27.943	27.7725	25.6369	25.2969	25.071
Q9Y383	LUC7L2	5.22779	2.65564	5	27.3353	27.337	27.0868	24.6167	24.5787	24.5967
Q9H078	CLPB	3.1219	2.66237	5	24.6386	24.6844	24.4378	22.3193	21.3899	22.0645
P09936	UCHL1	4.2087	2.66773	5	26.2346	26.6648	26.6424	23.7274	23.9139	23.8973
Q5SY16	NOL9	3.2334	2.68481	5	25.4001	24.7844	24.8392	22.6754	22.04	22.2538
Q16630	CPSF6	4.60892	2.70538	5	25.1701	25.1227	25.0725	22.6027	22.4512	22.1954
O95793	STAU1	4.8864	2.72538	5	24.5327	24.8911	24.7384	21.9814	22.0233	21.9814
Q9ULV4	CORO1C	2.53777	2.72927	5	23.7852	24.0622	24.6489	20.8709	22.0281	21.4094
P62263	RPS14	3.61596	2.73369	5	27.6434	27.7271	27.5483	24.6332	24.7564	25.3281
O94854	MACF1	4.53959	2.76217	5	28.8353	28.4796	28.7443	26.0577	25.8021	25.9128
P62851	RPS25	3.61926	2.80485	5	27.3504	27.5789	27.1852	24.57	24.9019	24.2282
Q8IWX8	CHERP	3.16397	2.86099	5	24.7993	24.4198	23.9653	21.8423	21.5419	21.2171
O75116	ROCK2	2.51163	2.86445	5	23.9762	23.8666	24.0922	20.4565	20.9267	21.9583
Q14258	TRIM25	2.33561	2.88875	5	23.9343	22.5295	22.4206	20.3204	19.872	20.0257
O75396	SEC22B	2.03747	2.89668	5	25.2076	24.099	24.6566	22.7776	21.0413	21.4543
Q15365	PCBP1	3.77103	2.94332	5	28.0195	27.7975	27.5195	24.926	25.058	24.5225
P13804	ETFA	2.57481	2.95399	5	24.1849	22.9408	22.862	20.2567	20.2567	20.6122
P60891	PRPS1	3.26707	2.96633	5	25.8648	25.3218	24.8483	22.3734	22.3746	22.3879
P50502	ST13	2.24624	2.97035	5	25.7319	25.3876	25.3519	23.3992	22.6119	21.5492
Q9UHD8	SEPTIN9	2.27061	3.00067	5	22.0099	23.4311	22.3617	18.9819	20.1576	19.6612
O75616	ERAL1	2.14554	3.01993	5	21.8064	23.4814	23.6658	20.1144	19.8897	19.8897
P11171	EPB41	3.74045	3.04892	5	23.5723	23.2538	23.449	19.99	20.7061	20.4323
P53007	SLC25A1	2.85972	3.06677	5	25.7392	25.2817	25.421	22.9887	22.5112	21.7417
P52597	HNRNPF	2.79277	3.07308	5	25.2885	26.2064	26.1501	23.3104	22.7513	22.364
P32969	RPL9	4.59755	3.1102	5	28.976	28.7611	28.4883	25.6464	25.6318	25.6167
Q13620	CUL4B	2.81337	3.12281	5	23.565	23.972	23.3748	20.1487	21.246	20.1487
Q13185	CBX3	3.66443	3.15796	5	26.3634	26.2386	26.3664	23.6299	22.8063	23.0583
P61254	RPL26	2.02409	3.16608	5	25.9831	26.9744	26.8176	22.2247	24.1181	23.934
P49591	SARS1	4.74325	3.20394	5	23.3736	23.0293	23.1193	20.1398	19.9013	19.8692
Q9NNW5	WDR6	3.83007	3.24547	5	24.1738	23.6618	23.5005	20.4238	20.7521	20.4238
Q96CW1	AP2M1	2.35534	3.26769	5	24.9135	24.477	24.375	22.3994	20.7815	20.7815
Q9BWF3	RBM4	3.3187	3.29471	5	24.1386	23.1246	23.8868	20.5912	20.3373	20.3373
P54709	ATP1B3	2.59697	3.36223	5	24.5144	25.0043	25.1775	22.1529	21.8148	20.6418
Q9UI26	IPO11	4.25212	3.39815	5	23.9441	23.9823	23.9515	20.3727	20.3727	20.9379
P19623	SRM	2.51535	3.43342	5	24.9365	24.66	24.3406	22.2276	20.7046	20.7046
P30084	ECHS1	2.4985	3.45093	5	25.2579	25.4317	24.8608	22.6525	20.8614	21.6838
Q13523	PRP4K	3.09353	3.51135	5	23.7	23.8774	23.0407	19.6188	20.5876	19.8776
Q8NAV1	PRPF38A	3.01918	3.51357	5	24.1936	25.3181	24.1927	20.9059	21.3519	20.9059
P53597	SUCLG1	5.87577	3.55704	5	24.8401	24.8414	24.7728	21.1872	21.4088	21.1872
Q9H2U1	DHX36	2.61457	3.60063	5	23.9062	23.7149	22.4934	19.4816	19.4816	20.3495
P24666	ACP1	2.86469	3.60844	5	25.4138	25.2395	24.3834	20.7546	21.7391	21.7177
Q99729	HNRNPAB	3.44657	3.67426	5	25.7349	25.4995	25.3264	21.263	22.2923	21.9827
P08758	ANXA5	2.06602	3.71062	5	25.21	24.1601	23.9872	21.6322	19.4287	21.1645
P52565	ARHGDIA	2.40271	3.93228	5	26.7543	26.3311	25.5395	21.4617	22.0318	23.3346
P37837	TALDO1	2.76707	4.29371	5	25.0513	23.4847	23.7904	20.4466	19.518	19.4806
Q13155	AIMP2	2.43254	4.30432	5	25.102	25.5714	24.1964	21.8141	20.0315	20.1112
P35606	COPB2	3.19106	4.3155	5	23.8803	23.4553	22.7904	18.7314	19.6897	18.7583
Q68CQ4	UTP25	4.79862	4.46864	5	24.052	24.5101	24.5619	19.8258	19.8258	20.0664
P40925	MDH1	2.12201	4.51059	5	24.9235	25.5698	25.5393	19.9543	19.9543	22.5923
P00505	GOT2	3.00893	4.67803	5	25.7352	25.9123	25.9424	20.2488	21.1999	22.1071
Q16629	SRSF7	2.19849	5.70727	5	28.0205	26.6213	26.0641	22.1998	22.0273	19.357
Q01105	SET	4.34202	6.14685	5	26.3302	25.8031	26.2488	19.7009	20.5397	19.7009
Q9NS69	TOMM22	3.5288	6.22868	5	25.7194	26.4181	26.4298	19.4873	19.4873	20.9066
P46821	MAP1B	3.48435	6.88381	5	21.9311	20.0734	20.1999	13.851	13.851	13.851
P05783	KRT18	7.26294	7.80107	5	21.5758	21.5758	21.8044	13.851	13.851	13.851
Q8N1G4	LRRC47	3.86583	8.07723	5	23.0089	21.6553	21.1203	13.851	13.851	13.851
P30260	CDC27	3.02456	8.33736	5	24.0768	21.4815	21.0067	13.851	13.851	13.851
O60318	MCM3AP	3.973	8.34673	5	23.2887	21.6522	21.6522	13.851	13.851	13.851
O95163	ELP1	4.94626	8.3628	5	22.8336	21.867	21.9407	13.851	13.851	13.851
P07954	FH	4.54646	8.4682	5	22.5421	22.8667	21.5487	13.851	13.851	13.851
Q15022	SUZ12	3.81663	8.50665	5	21.841	21.6604	23.5715	13.851	13.851	13.851
Q9BZF1	OSBPL8	9.3448	8.55516	5	22.4565	22.3809	22.3809	13.851	13.851	13.851
Q8ND82	ZNF280C	2.31591	8.58872	5	23.4998	24.3764	23.9389	18.3471	13.851	13.851
P41214	EIF2D	11.5771	8.59184	5	22.4373	22.4567	22.4344	13.851	13.851	13.851
Q96P70	IPO9	4.69726	8.62211	5	22.1041	23.2129	22.1023	13.851	13.851	13.851
Q86Y56	DNAAF5	4.17893	8.68499	5	23.5181	21.853	22.2368	13.851	13.851	13.851
Q5SW79	CEP170	5.84885	8.70165	5	22.7913	22.6938	22.1729	13.851	13.851	13.851
Q9NYV4	CDK12	5.60934	8.78394	5	22.2372	23.0065	22.6611	13.851	13.851	13.851
Q9Y4L1	HYOU1	3.16911	8.80211	5	24.1069	22.9137	20.9387	13.851	13.851	13.851
O43865	AHCYL1	5.5215	8.87044	5	22.3309	23.1473	22.686	13.851	13.851	13.851
P62316	SNRPD2	2.0194	8.93679	5	25.3888	24.2423	24.3776	13.851	13.851	19.4964
Q9Y6G9	DYNC1LI1	4.59217	8.96176	5	22.044	22.957	23.4372	13.851	13.851	13.851
Q9BQ67	GRWD1	4.05743	9.00238	5	23.7011	21.7954	23.0635	13.851	13.851	13.851
Q99700	ATXN2	3.81394	9.00829	5	24.1134	21.9625	22.5019	13.851	13.851	13.851
O94913	PCF11	5.23608	9.03479	5	22.9521	22.3643	23.3408	13.851	13.851	13.851
Q9BW27	NUP85	4.4545	9.30291	5	23.8564	22.2897	23.3155	13.851	13.851	13.851
Q969X6	UTP4	4.69472	9.30914	5	22.7237	23.9589	22.7977	13.851	13.851	13.851
O00151	PDLIM1	10.4453	9.56531	5	23.4013	23.4462	23.4013	13.851	13.851	13.851
Q9NQC3	RTN4	5.33221	9.6143	5	22.9263	23.5703	23.8992	13.851	13.851	13.851
P28074	PSMB5	6.11816	9.81556	5	23.301	23.7952	23.9033	13.851	13.851	13.851
P35613	BSG	4.12293	10.3194	5	24.8165	24.7597	22.9349	13.851	13.851	13.851
Q8N684	CPSF7	6.1862	11.1871	5	25.2129	25.2682	24.633	13.851	13.851	13.851
P06454	PTMA	7.23448	11.3661	5	25.0121	25.2375	25.4014	13.851	13.851	13.851
P11177	PDHB	2.91915	1.44793	6	24.5203	24.4989	24.684	23.3744	22.8064	23.1788
Q13162	PRDX4	4.70041	1.85159	6	25.852	25.7852	25.7813	23.8502	23.9112	24.1022
Q96QK1	VPS35	3.03626	1.85685	6	23.9934	24.496	24.3352	22.4351	22.6693	22.1497
Q96AE4	FUBP1	3.48206	1.92509	6	24.8776	25.1747	25.11	22.8816	23.3717	23.1338
Q12904	AIMP1	3.5132	2.02966	6	25.5274	25.1011	25.0004	23.2575	23.0532	23.2292
P48047	ATP5PO	2.44672	2.14076	6	25.4798	25.7329	25.0869	23.8291	23.2318	22.8164
Q7L576	CYFIP1	2.33497	2.17092	6	23.9183	25.2254	24.6938	22.4525	22.4361	22.4361
O75821	EIF3G	3.43776	2.18486	6	25.803	25.4965	25.4158	23.6987	23.2359	23.2261
P05141	SLC25A5	4.77496	2.20315	6	31.6035	31.4382	31.3741	29.387	29.2116	29.2077
P27635	RPL10	5.37892	2.2226	6	29.4638	29.4103	29.2973	27.2495	27.1402	27.1138
P63241	EIF5A	4.1422	2.24993	6	26.9363	26.6859	26.5084	24.531	24.4822	24.3676
P49207	RPL34	3.26187	2.2566	6	28.2967	28.3007	27.7507	26.042	25.9281	25.6082
P62495	ETF1	2.25717	2.34431	6	24.7402	23.811	23.6874	22.0518	21.1895	21.9644
Q02978	SLC25A11	3.17314	2.35742	6	25.8891	25.773	25.586	23.6194	23.6255	22.931
P30876	POLR2B	3.16102	2.37266	6	24.4013	24.7522	24.4804	21.7378	22.277	22.5011
P46776	RPL27A	3.81014	2.37561	6	28.7053	28.6311	28.4688	26.4206	26.3398	25.918
P62269	RPS18	3.31447	2.39454	6	26.4423	25.9233	26.4886	23.7798	23.718	24.1728
Q9UI10	EIF2B4	2.05201	2.41172	6	22.6134	23.5308	23.9536	20.3236	21.2975	21.2416
Q6PJT7	ZC3H14	2.4489	2.41915	6	23.6939	23.2465	22.6341	20.5261	20.5261	21.2649
Q16643	DBN1	3.64969	2.48859	6	24.7163	24.7691	24.5865	22.0131	22.5799	22.0131
P62910	RPL32	5.15861	2.60243	6	28.2304	28.4588	28.4581	25.7568	25.7268	25.8563
Q99497	PARK7	3.74565	2.7188	6	26.6656	27.0704	26.7187	24.1598	24.3384	23.8001
P42167	TMPO	2.4082	2.75276	6	25.7365	25.5534	24.5796	22.9665	22.6519	21.9928
P29966	MARCKS	2.94775	2.76431	6	23.9725	24.4217	24.092	21.8055	20.806	21.5818
Q9NVU7	SDAD1	4.22322	2.78199	6	23.7261	23.6794	23.8319	20.9444	21.2337	20.7133
P62829	RPL23	3.67702	2.83474	6	28.9529	28.8044	28.7107	25.9983	26.3441	25.6213
P29692	EEF1D	5.47422	2.88547	6	25.8341	26.0282	26.0821	23.0559	23.1384	23.0938
Q13564	NAE1	2.72487	2.93053	6	24.0453	22.9473	23.8221	20.452	20.452	21.1191
P62750	RPL23A	3.90279	2.9797	6	29.3327	29.0925	28.6667	26.0973	25.9376	26.118
Q02241	KIF23	4.68092	3.09826	6	23.503	23.7133	23.2699	20.3571	20.3571	20.4771
Q96CS3	FAF2	2.66612	3.25468	6	24.6526	23.4418	23.3076	20.8278	20.591	20.219
P08708	RPS17	2.06638	3.28412	6	26.5204	26.8966	25.7325	23.3881	23.9458	21.9632
O00232	PSMD12	2.72181	3.29187	6	23.3831	24.2337	22.7639	20.4735	20.0158	20.0158
P00918	CA2	2.48868	3.34484	6	27.255	26.7157	25.791	23.8019	23.2133	22.712
Q9NX58	LYAR	4.12538	3.40296	6	24.7579	25.0905	24.9594	21.7603	21.6589	21.1797
Q15386	UBE3C	2.74071	3.40314	6	23.6965	24.1006	23.6614	19.9759	21.2973	19.9759
P08237	PFKM	3.98824	3.42705	6	23.955	24.2443	23.6679	20.3817	20.3817	20.8225
P00367	GLUD1	3.07587	3.54022	6	24.1396	24.1395	24.4445	21.4589	20.2875	20.3566
Q96RP9	GFM1	4.08049	3.57866	6	23.9921	23.7068	23.6917	20.344	20.4782	19.8325
Q16850	CYP51A1	2.60396	3.60317	6	24.6197	23.9926	24.0138	20.1143	20.1143	21.588
Q92552	MRPS27	2.54048	3.70196	6	24.7209	23.9552	23.8704	20.9451	19.4797	21.0158
Q8IYB3	SRRM1	6.06514	3.71804	6	26.2569	26.2966	26.1503	22.6292	22.4379	22.4825
Q9Y450	HBS1L	2.84343	3.76639	6	23.933	23.7477	24.8015	20.7472	20.7504	19.6853
O94826	TOMM70	5.36051	3.80034	6	24.0924	24.3436	24.4582	20.4717	20.4717	20.5498
P31946	YWHAB	3.06433	3.81471	6	25.7956	25.743	24.897	21.9496	22	21.0419
Q12905	ILF2	3.32313	3.81666	6	26.8365	26.0772	26.4031	23.022	22.0539	22.791
O00231	PSMD11	2.73132	3.96152	6	24.9542	23.9717	23.124	19.9388	20.2877	19.9388
Q09161	NCBP1	2.0759	4.04047	6	25.9214	25.6361	25.4751	20.7781	20.8476	23.2855
P04181	OAT	2.23435	4.06753	6	25.1912	25.1333	24.5742	22.3542	20.3122	20.0297
Q9ULW0	TPX2	3.29243	4.09291	6	24.1716	24.0117	24.2141	20.1817	20.6404	19.2966
P62937	PPIA	3.92915	4.09655	6	28.8794	28.997	28.813	24.3978	25.3114	24.6905
Q7Z4W1	DCXR	2.07843	4.10724	6	24.2417	23.8005	23.216	18.0873	20.6834	20.1658
P51858	HDGF	4.35884	4.11848	6	26.8102	26.496	26.6678	22.9235	22.29	22.4049
P16152	CBR1	3.57408	4.29283	6	25.4531	24.7098	24.8563	20.4416	21.2575	20.4416
Q96PZ0	PUS7	6.25638	4.33274	6	23.5981	23.6459	23.441	19.1856	19.1856	19.3157
Q07021	C1QBP	3.33926	4.53094	6	27.6613	27.5218	26.6757	22.5481	23.3462	22.3716
O95602	POLR1A	2.94161	4.57595	6	22.1207	23.7215	23.762	18.8341	18.5211	18.5211
P09661	SNRPA1	2.87667	4.77497	6	25.9013	25.7637	25.9308	22.211	20.1825	20.8774
P05387	RPLP2	3.01894	6.55649	6	28.5961	28.2709	28.1428	23.0863	21.7321	20.5219
P62633	CNBP	3.80211	6.66028	6	22.7145	22.9789	22.4797	15.1554	16.4067	16.6301
Q9Y2U8	LEMD3	2.0221	6.66191	6	21.3759	21.6899	22.6051	17.9832	13.851	13.851
Q96Q15	SMG1	4.50652	6.86917	6	20.5627	21.3524	20.2453	13.851	13.851	13.851
O75475	PSIP1	2.5988	7.95126	6	23.6954	23.1029	20.3835	13.851	15.6261	13.851
P49454	CENPF	4.55104	8.31195	6	21.7748	21.7748	22.9392	13.851	13.851	13.851
Q6ZNB6	NFXL1	3.68183	8.79804	6	23.3441	23.3176	21.2854	13.851	13.851	13.851
Q9BWH6	RPAP1	6.82871	8.85582	6	22.5026	22.8847	22.733	13.851	13.851	13.851
Q9BY44	EIF2A	4.97396	8.97037	6	22.1973	23.308	22.9587	13.851	13.851	13.851
Q9HC35	EML4	4.49202	9.33192	6	22.3719	23.93	23.2468	13.851	13.851	13.851
P42695	NCAPD3	5.47906	9.65364	6	23.241	24.0318	23.241	13.851	13.851	13.851
P61981	YWHAG	3.14136	9.81113	6	24.7639	24.7021	24.6596	16.9904	13.851	13.851
Q14562	DHX8	4.94405	9.81704	6	23.1567	24.3752	23.4721	13.851	13.851	13.851
Q7Z417	NUFIP2	5.16231	9.81756	6	23.6257	24.2462	23.1337	13.851	13.851	13.851
O43395	PRPF3	6.83415	9.96004	6	23.8996	23.5651	23.9683	13.851	13.851	13.851
Q9ULK4	MED23	4.95552	10.0309	6	24.5285	23.8722	23.2448	13.851	13.851	13.851
Q9UIA9	XPO7	4.71703	10.237	6	24.8443	23.3403	24.0793	13.851	13.851	13.851
Q13573	SNW1	5.92595	10.5472	6	24.8096	24.3397	24.0453	13.851	13.851	13.851
P22695	UQCRC2	3.30863	1.40702	7	24.8376	24.7793	24.4786	23.2693	23.1687	23.4364
Q9NVI7	ATAD3A	2.52392	1.68907	7	27.0835	26.8785	26.8125	25.7142	25.1184	24.8748
P62826	RAN	3.14434	1.72928	7	27.9605	28.0335	28.0289	26.0669	26.126	26.6421
P62277	RPS13	2.42616	1.93174	7	27.5631	26.9386	26.8234	25.3792	24.735	25.4158
P05198	EIF2S1	3.71949	2.06432	7	25.3163	25.0769	24.9407	23.2684	22.9596	22.9129
P18621	RPL17	4.52378	2.14327	7	28.7771	28.806	28.8595	26.4928	26.8339	26.6862
P28288	ABCD3	2.39823	2.19624	7	24.7387	25.1005	25.5243	22.4223	22.9226	23.4298
P30041	PRDX6	3.5318	2.2631	7	26.6439	26.3227	26.2801	24.4499	23.9388	24.0687
P60228	EIF3E	3.12344	2.28272	7	25.5492	25.182	25.5128	23.5304	23.0804	22.785
P78344	EIF4G2	2.57516	2.31652	7	23.7268	23.0408	22.5658	20.7057	20.9724	20.7057
P46977	STT3A	2.71845	2.3445	7	25.7573	25.6107	26.1104	23.4962	22.9776	23.9712
Q53H12	AGK	3.90934	2.46147	7	25.1244	24.9616	24.6312	22.5941	22.309	22.4297
O00116	AGPS	2.01595	2.47078	7	24.7063	23.9094	23.7829	22.2328	21.9692	20.7843
Q8WXF1	PSPC1	2.87868	2.47501	7	24.6241	24.9461	24.6632	22.6395	22.4762	21.6928
P31153	MAT2A	2.91627	2.72448	7	25.6172	25.5054	25.1127	22.8459	23.1012	22.1148
Q9UMS4	PRPF19	2.07913	2.73235	7	26.1731	25.6565	25.2595	23.6068	23.2999	21.9853
P35232	PHB1	2.82203	2.77577	7	26.6814	26.0185	26.6931	24.0098	23.1278	23.9281
Q9Y3I0	RTCB	2.21982	2.82942	7	25.5915	25.2823	25.5674	23.57	22.6243	21.7587
Q15050	RRS1	2.6315	2.83641	7	26.0573	26.067	25.3962	22.5714	23.6906	22.7492
O95232	LUC7L3	3.23097	2.83686	7	27.4066	26.9038	26.8554	24.6082	24.2233	23.8238
Q9Y617	PSAT1	4.02173	2.84831	7	24.3492	24.6497	24.8056	21.8228	21.9203	21.5165
Q99848	EBNA1BP2	3.10828	3.01849	7	26.6273	26.029	25.5058	23.1234	23.0473	22.9359
Q9Y678	COPG1	2.06679	3.11051	7	25.2953	24.4944	23.6829	22.189	20.6395	21.3127
Q13123	IK	3.27314	3.11719	7	23.9236	23.4065	24.2578	20.5631	21.1101	20.5631
O00299	CLIC1	3.444	3.14974	7	26.7661	26.6879	26.6391	23.9508	23.6793	23.0138
O43707	ACTN4	3.09924	3.15078	7	26.309	25.8665	25.7593	22.2587	23.2824	22.9414
P08865	RPSA	3.0584	3.16081	7	28.3008	28.0297	27.9583	25.1667	25.3714	24.2684
Q14978	NOLC1	2.52555	3.16258	7	24.9914	25.1281	24.997	22.7489	21.059	21.8209
Q99615	DNAJC7	2.55072	3.18461	7	23.9678	24.7624	24.7162	21.9986	21.3243	20.5698
Q96A33	CCDC47	2.68693	3.19875	7	24.4799	24.3403	24.7507	20.8921	20.8921	22.1904
Q9Y2A7	NCKAP1	3.27184	3.19967	7	24.6876	24.8151	24.6024	22.0584	21.4599	20.9877
Q9UJZ1	STOML2	3.3691	3.25452	7	24.7457	25.2214	24.4998	21.4779	21.9806	21.2449
O60832	DKC1	2.40696	3.32163	7	25.4184	24.4253	25.4516	22.4897	20.9701	21.8705
P04844	RPN2	2.28092	3.38118	7	27.1175	25.5066	25.9494	23.565	22.486	22.379
Q9NQ55	PPAN	4.0433	3.41276	7	25.9342	25.8566	25.4959	22.6756	22.1313	22.2416
O75152	ZC3H11A	4.37948	3.4418	7	23.763	24.1822	23.6471	20.3509	20.5652	20.3509
P28838	LAP3	3.50011	3.46988	7	24.351	24.6075	24.0671	20.4767	21.3497	20.7895
P12004	PCNA	3.7815	3.47837	7	26.8318	26.4434	26.9074	22.9294	23.1739	23.6442
O14979	HNRNPDL	3.88083	3.60193	7	26.2441	26.5919	26.0552	22.3711	22.6776	23.0368
Q9H8H2	DDX31	3.13898	3.60654	7	24.2087	23.9749	23.3246	19.9492	19.9492	20.7901
P19367	HK1	2.65203	3.75423	7	25.1637	25.0892	25.0166	22.3964	20.66	20.9504
Q16637	SMN1	2.67027	3.79606	7	26.4856	26.4483	25.4354	21.695	23.1074	22.1788
Q6NSI4	RADX	2.72853	3.82857	7	24.0846	22.5723	23.1456	20.0062	19.1553	19.1553
Q8NI27	THOC2	2.78093	3.82939	7	25.1498	24.9989	24.1751	20.5376	21.7603	20.5376
P31040	SDHA	3.9996	4.00165	7	23.5106	23.5106	24.2396	19.9224	19.6667	19.6667
P09211	GSTP1	2.91382	4.00372	7	27.5029	26.2927	26.5357	23.3819	22.2901	22.6483
Q9BYG3	NIFK	3.02809	4.12613	7	26.0257	26.0739	25.573	20.9147	22.4083	21.9712
Q14157	UBAP2L	5.36241	4.25385	7	25.7295	25.3455	25.4085	21.2047	21.2047	21.3127
P42166	TMPO	2.76559	4.27993	7	26.7184	26.0232	25.5961	22.4527	20.9101	22.1352
Q9UHI6	DDX20	3.02849	4.33456	7	24.9384	23.2565	24.1754	19.9731	19.6968	19.6968
Q8TED0	UTP15	4.99497	4.59663	7	24.0138	24.4376	24.5355	19.6885	19.6885	19.8199
P50395	GDI2	2.51146	4.91737	7	26.7566	25.935	26.4625	20.0254	22.3987	21.9779
Q13535	ATR	4.61463	7.93487	7	21.6984	22.4434	21.2157	13.851	13.851	13.851
O75717	WDHD1	3.42112	8.26153	7	20.78	22.1954	23.3621	13.851	13.851	13.851
P51608	MECP2	3.22892	9.13515	7	24.6346	21.4339	22.8898	13.851	13.851	13.851
Q99590	SCAF11	3.59577	9.19378	7	23.5917	21.5626	23.9799	13.851	13.851	13.851
Q9BTC0	DIDO1	6.87185	9.58962	7	23.5774	23.2071	23.5373	13.851	13.851	13.851
Q14247	CTTN	4.37011	10.632	7	23.3843	24.9491	25.1154	13.851	13.851	13.851
Q86UE4	MTDH	5.34961	11.3009	7	25.6235	25.322	24.51	13.851	13.851	13.851
O00159	MYO1C	5.83953	11.3767	7	25.2498	25.6532	24.78	13.851	13.851	13.851
Q8WUH6	TMEM263	7.87988	14.3164	7	28.0551	28.0844	28.3627	13.851	13.851	13.851
Q06830	PRDX1	4.59232	1.48489	8	29.7397	29.866	29.6844	28.2174	28.3568	28.2613
O95478	NSA2	2.06782	1.78458	8	26.1741	26.0104	25.9902	23.918	23.8973	25.0056
P48444	ARCN1	2.42731	1.79622	8	24.8797	24.7895	24.0807	22.6233	23.0965	22.6414
P62249	RPS16	3.4772	1.82523	8	29.3516	29.115	28.8764	27.2965	27.4265	27.1443
P40429	RPL13A	3.74282	1.84662	8	29.1199	29.0297	28.8626	27.2789	26.9261	27.2673
Q99733	NAP1L4	4.38781	1.95309	8	25.9064	25.6404	25.7114	23.6944	23.9059	23.7986
Q5VTE0	EEF1A1P5	3.60056	2.01585	8	31.3105	31.2046	30.9004	29.1286	29.3073	28.9319
Q02543	RPL18A	5.18874	2.06654	8	29.8635	29.6389	29.7603	27.6589	27.712	27.6923
P84098	RPL19	3.02543	2.09495	8	27.8255	27.9005	27.8143	25.4079	25.6385	26.209
P37802	TAGLN2	3.03932	2.12281	8	27.0852	26.6877	26.4676	24.774	24.7921	24.3059
P61313	RPL15	4.27327	2.17358	8	29.0156	29.2579	29.2234	26.8153	27.1258	27.0351
Q00325	SLC25A3	5.16378	2.24426	8	27.6195	27.5541	27.5314	25.2509	25.4612	25.2601
Q07020	RPL18	3.16994	2.25613	8	30.9134	30.8277	30.3136	28.5731	28.5739	28.1394
P33991	MCM4	3.56747	2.35998	8	26.2261	25.8603	25.9022	23.9465	23.5317	23.4306
Q92499	DDX1	2.857	2.3703	8	25.5951	25.1609	25.2734	23.4109	22.479	23.0285
P51149	RAB7A	2.68584	2.39367	8	26.6143	26.0118	25.4598	23.6082	23.7225	23.5741
Q8IWS0	PHF6	3.85087	2.43279	8	25.2305	25.1696	24.8736	22.8314	22.741	22.4029
P62805	H4C1	4.32437	2.52782	8	32.2768	31.9539	31.9302	29.6752	29.4387	29.4636
Q8IY37	DHX37	4.12442	2.55956	8	24.5083	24.1298	24.1718	21.8512	21.7517	21.5285
Q9UGP8	SEC63	2.06557	2.57786	8	24.7522	23.6814	23.4801	22.1162	20.9763	21.0877
P09960	LTA4H	2.30994	2.58436	8	25.0649	24.7633	24.5905	21.3564	22.7679	22.5413
Q96I24	FUBP3	2.58957	2.60069	8	24.9285	25.6002	24.8703	21.9586	22.6197	23.0185
Q14103	HNRNPD	3.51613	2.62792	8	28.7685	28.6523	28.1887	26.0677	25.6337	26.0242
P55786	NPEPPS	3.79596	2.63657	8	25.188	25.0728	24.9761	22.7903	22.1816	22.3553
Q9Y295	DRG1	4.26023	2.65962	8	25.7895	25.8988	25.7297	22.9369	23.4079	23.0942
P0DMV9	HSPA1B	4.30585	2.69519	8	29.3965	29.2175	29.0166	26.6599	26.5488	26.3362
Q9BXJ9	NAA15	2.67204	2.74374	8	25.4352	25.4317	25.4183	21.9206	23.1921	22.9413
P08621	SNRNP70	3.78658	2.79934	8	27.3723	27.0623	27.0284	24.547	24.5066	24.0114
Q7Z3K3	POGZ	2.5922	2.85606	8	24.6005	23.2571	23.8356	20.8701	20.8701	21.3847
Q9NR09	BIRC6	3.21191	2.92502	8	23.3101	22.6906	22.2807	19.8305	19.8453	19.8305
Q07955	SRSF1	4.06691	2.95312	8	25.9096	25.6378	25.5656	23.0157	22.4974	22.7405
P04637	TP53	2.74981	2.95943	8	25.6157	25.5499	25.8208	22.5699	22.1008	23.4375
Q96C36	PYCR2	2.00533	2.98668	8	27.1278	25.4063	25.9759	23.9576	22.9828	22.6096
P26368	U2AF2	3.58761	3.07995	8	27.6014	27.5401	27.0231	24.5905	24.341	23.9932
P46060	RANGAP1	3.37367	3.12097	8	25.3084	24.4725	25.3405	21.8816	22.0339	21.8429
P22102	GART	3.18694	3.15966	8	26.1663	25.4875	25.6236	22.0941	22.8027	22.9016
Q15084	PDIA6	2.49049	3.17254	8	26.8636	26.7735	26.0859	23.9332	23.7415	22.5307
P46459	NSF	2.27244	3.22254	8	24.7286	23.3734	23.1391	21.1516	20.211	20.211
Q12874	SF3A3	2.1171	3.27933	8	25.4243	24.3624	24.4839	20.4856	21.495	22.452
P05388	RPLP0	4.2113	3.32683	8	27.7655	27.8949	27.4109	24.4241	24.5381	24.1287
Q9Y266	NUDC	2.54181	3.33934	8	26.6525	25.8272	25.5525	21.8951	23.1565	22.9626
P38432	COIL	2.25852	3.35832	8	24.2168	25.2689	25.2576	20.5529	22.1995	21.9159
P52948	NUP98	3.52509	3.37195	8	24.0176	24.7765	24.6169	20.9779	20.884	21.4332
Q9BQ52	ELAC2	4.76506	3.40043	8	23.8222	23.6472	23.4389	20.1497	20.4077	20.1497
P08133	ANXA6	2.76261	3.45886	8	24.9573	25.014	24.4585	20.9222	22.2089	20.9222
Q96ME7	ZNF512	3.07328	3.46828	8	24.3476	25.041	23.7653	21.0894	20.9539	20.7057
P32322	PYCR1	2.42189	3.5436	8	26.1605	26.0421	24.8431	22.8348	21.4198	22.1602
O95831	AIFM1	2.44476	3.55663	8	25.8893	25.2287	24.811	22.7255	21.1929	21.3407
P09429	HMGB1	4.19187	3.63276	8	26.695	26.412	26.8014	23.2581	22.6714	23.0806
Q96I25	RBM17	2.90569	3.71352	8	24.7784	25.727	24.2519	20.9931	21.4923	21.1314
Q9Y277	VDAC3	3.23458	3.73815	8	28.6291	28.2221	27.4608	24.6829	24.2014	24.2133
Q5T3I0	GPATCH4	4.34199	3.74934	8	24.1768	24.7232	24.229	20.7796	20.6446	20.4568
Q8TEQ6	GEMIN5	6.00693	3.80562	8	24.3925	24.3925	24.5845	20.6087	20.6087	20.7352
P18669	PGAM1	2.12181	3.8562	8	26.6915	26.3031	25.4978	23.5924	22.0956	21.2357
Q5QJE6	DNTTIP2	2.54553	3.89488	8	25.2755	24.8919	23.7806	19.9827	21.2785	21.0021
P34897	SHMT2	3.43328	3.9438	8	24.9524	24.4841	24.5169	21.3463	20.4203	20.3554
P29401	TKT	5.26575	4.08831	8	26.4964	26.6613	26.2562	22.3582	22.3187	22.4721
Q8WWQ0	PHIP	4.00193	4.11242	8	24.4303	23.8396	24.1295	20.4245	19.8188	19.8188
Q99460	PSMD1	4.09397	4.31978	8	24.382	24.1698	23.5454	19.844	19.7217	19.5722
P60174	TPI1	3.01851	4.62327	8	27.3595	26.4934	26.7169	21.6349	23.145	21.92
P14314	PRKCSH	2.26808	4.73277	8	25.5839	25.8132	25.1711	19.9472	22.4755	19.9472
P12277	CKB	3.3061	5.31483	8	29.5211	29.0889	29.3678	24.9993	23.4051	23.6288
Q14202	ZMYM3	3.63517	8.18276	8	24.7658	23.277	24.148	16.5345	16.1821	14.9259
Q8NCM8	DYNC2H1	3.93013	9.05014	8	23.3811	23.6258	21.6964	13.851	13.851	13.851
Q92620	DHX38	3.53091	9.14847	8	24.3861	21.707	22.9053	13.851	13.851	13.851
Q9UPU5	USP24	4.82226	9.17479	8	22.3807	23.6485	23.0481	13.851	13.851	13.851
Q92576	PHF3	7.98053	9.89378	8	23.836	23.6215	23.7768	13.851	13.851	13.851
Q9BY77	POLDIP3	5.26048	10.3411	8	24.8031	24.0535	23.7197	13.851	13.851	13.851
P31943	HNRNPH1	3.4575	1.85766	9	28.9969	28.6838	28.8061	26.8958	26.7813	27.2366
P00338	LDHA	2.69834	2.01284	9	29.1078	28.7594	28.5242	27.2297	26.5993	26.5239
P46779	RPL28	3.30397	2.03298	9	27.9652	27.7936	27.3212	25.7424	25.6276	25.611
P26373	RPL13	2.68657	2.08539	9	28.731	28.1314	28.8312	26.8689	26.3019	26.2666
P62753	RPS6	3.55461	2.12787	9	29.1969	29.3501	29.6691	27.3622	27.0582	27.4122
Q14566	MCM6	2.15351	2.12834	9	25.1451	25.4237	24.9977	23.6554	22.3027	23.2233
Q9NY93	DDX56	3.19909	2.14011	9	25.553	25.5198	25.7561	23.8778	23.1973	23.3333
P55209	NAP1L1	2.30862	2.2083	9	28.5067	28.294	27.8494	26.6847	25.7531	25.5874
P42696	RBM34	3.59862	2.25084	9	25.7473	25.5594	25.953	23.2812	23.7718	23.4541
P41091	EIF2S3	3.11081	2.31623	9	25.7094	25.4379	25.1571	23.1177	23.4564	22.7817
P17812	CTPS1	3.23263	2.32257	9	26.1547	25.6815	25.7113	23.2286	23.8441	23.5071
P52292	KPNA2	4.23845	2.33316	9	26.9022	26.7652	26.9682	24.5308	24.3518	24.7534
P26639	TARS1	2.38231	2.37774	9	24.8039	23.5681	23.9428	21.557	22.0676	21.557
Q9Y262	EIF3L	2.83059	2.44728	9	26.8191	26.2178	26.3674	24.4718	23.5788	24.012
Q9Y230	RUVBL2	3.28874	2.49055	9	25.9023	25.5944	25.2222	23.368	22.9148	22.9644
P22087	FBL	4.94681	2.58539	9	27.8045	27.8557	27.5659	25.131	25.1126	25.2263
P23528	CFL1	2.77	2.60792	9	28.8363	28.3951	27.9227	26.0887	25.9068	25.3347
Q12769	NUP160	3.54017	2.62344	9	24.9307	25.2408	24.9213	22.7818	22.1288	22.3119
P22234	PAICS	2.30197	2.68468	9	26.9474	26.5124	26.3375	24.5749	24.0975	23.0709
Q7Z2W4	ZC3HAV1	2.37241	2.73591	9	23.2305	22.9461	23.6394	20.2778	21.3604	19.9701
Q16658	FSCN1	2.7813	2.7421	9	25.5738	24.3616	24.6941	22.0833	22.2066	22.1133
P48634	PRRC2A	3.2454	2.76393	9	24.5379	23.8069	24.6341	21.748	21.4696	21.4696
Q8WTT2	NOC3L	4.84599	2.79073	9	26.0434	25.8553	25.766	23.123	22.9596	23.21
Q7Z478	DHX29	2.21142	2.86395	9	23.6081	22.5289	21.7578	19.6925	19.6925	19.9181
Q07666	KHDRBS1	4.03327	3.01268	9	27.528	27.3041	27.4925	24.3398	24.1768	24.77
Q96AG4	LRRC59	5.20152	3.12799	9	27.8912	27.7947	27.6568	24.7901	24.5379	24.6307
P06748	NPM1	4.54862	3.14213	9	30.1583	29.7718	29.8166	26.8135	26.6161	26.8908
Q9BTW9	TBCD	2.74408	3.17132	9	24.2663	25.1897	23.823	21.123	21.0851	21.5569
O00267	SUPT5H	2.29386	3.19331	9	23.4275	24.9709	24.0669	20.604	20.604	21.6773
Q9Y4P3	TBL2	2.74633	3.19451	9	25.016	23.946	25.3862	21.5616	21.6415	21.5616
O75367	MACROH2A1	4.13778	3.36789	9	28.115	27.6707	27.6274	24.4749	24.6317	24.2028
Q9P275	USP36	3.38405	3.39929	9	24.0702	23.4838	23.7162	20.8848	20.0938	20.0938
Q9NWH9	SLTM	4.47625	3.41465	9	24.6199	24.7211	24.3907	20.9489	21.1269	21.4119
Q2NL82	TSR1	2.21133	3.42684	9	25.85	25.7127	26.0708	23.272	21.1903	22.8907
Q15393	SF3B3	2.70633	3.50855	9	25.4337	25.2223	24.7152	22.3993	21.5606	20.8858
Q9Y5J1	UTP18	2.61223	3.52573	9	25.2616	24.4972	23.9295	21.4889	21.2653	20.3569
O43491	EPB41L2	2.66391	3.66594	9	25.775	24.5774	24.6565	21.2395	20.7839	21.9877
P27824	CANX	2.78604	3.68797	9	26.759	26.9475	27.0992	23.6147	23.8269	22.3002
Q96T37	RBM15	3.51561	3.71152	9	24.7962	24.2271	24.6794	20.3924	21.312	20.8637
Q00341	HDLBP	3.05369	3.95728	9	23.4012	24.677	24.5789	20.0885	20.0885	20.6083
Q9BPX3	NCAPG	3.30487	4.05979	9	25.1896	25.1752	24.8355	21.0858	20.3206	21.6145
P67809	YBX1	4.94121	4.25539	9	26.9229	26.9532	26.8918	22.9456	22.4002	22.6559
O96008	TOMM40	3.86252	4.28138	9	27.6643	27.2908	27.2735	23.6588	22.948	22.7776
Q9P258	RCC2	2.60845	4.41045	9	26.1307	26.6986	26.736	20.8717	22.7438	22.7183
Q7L0Y3	TRMT10C	4.69877	4.82652	9	23.4727	23.8221	24.1751	19.0266	19.0482	18.9155
Q9H2P0	ADNP	2.75045	5.07321	9	24.6399	23.4846	24.1517	18.4209	20.2148	18.4209
Q9NTI5	PDS5B	4.80264	8.24539	9	24.0731	24.4609	23.6995	16.0375	16.1246	15.3352
Q6P158	DHX57	5.54094	9.14237	9	23.3653	23.0724	22.5422	13.851	13.851	13.851
O75592	MYCBP2	8.18784	9.23039	9	23.1433	23.1248	22.976	13.851	13.851	13.851
P46782	RPS5	5.90914	1.68862	10	27.6193	27.5688	27.4962	25.8775	25.8642	25.8769
P14868	DARS1	2.12498	1.73297	10	24.8646	25.9085	25.8061	23.6064	23.9445	23.8294
O94776	MTA2	3.05925	1.96202	10	26.0176	25.5369	25.8486	24.1766	23.6586	23.6819
Q9UHB9	SRP68	2.80397	2.06035	10	25.134	25.3794	24.8204	23.4655	22.9452	22.7421
P62917	RPL8	4.26048	2.08799	10	29.4405	29.2162	29.1097	27.2805	27.1542	27.0677
P62241	RPS8	6.54107	2.25858	10	30.7111	30.6773	30.6458	28.4747	28.3911	28.3927
P56182	RRP1	2.27043	2.26411	10	24.2344	24.6039	23.5791	21.344	22.3121	21.969
P11940	PABPC1	4.15661	2.28284	10	27.7806	27.5101	27.5136	25.4776	25.3433	25.1349
Q5SRE5	NUP188	3.59054	2.33196	10	24.4554	24.3727	24.7761	22.492	22.027	22.0893
P60842	EIF4A1	4.37046	2.40318	10	29.5384	29.3271	29.172	27.0711	26.8589	26.8979
P51991	HNRNPA3	5.75782	2.45954	10	27.7741	27.6934	27.8206	25.2184	25.3286	25.3624
Q03252	LMNB2	2.69136	2.46972	10	26.0848	25.7643	25.4696	23.8576	23.2097	22.8423
P49756	RBM25	3.30062	2.55428	10	26.5661	26.5767	26.7465	24.5387	23.9586	23.7291
Q15717	ELAVL1	2.456	2.58877	10	26.6557	26.2745	25.6654	24.2182	23.2802	23.3309
P23921	RRM1	2.34302	2.59244	10	25.4796	24.8169	24.4694	22.1922	22.9749	21.8216
Q9BXP5	SRRT	2.87758	2.60393	10	25.2055	25.0362	24.8454	22.7584	22.7082	21.8087
Q92598	HSPH1	3.56765	2.6138	10	25.2122	24.9917	24.7086	22.6259	22.0714	22.3737
P51659	HSD17B4	2.49104	2.6197	10	26.7074	26.1966	25.8782	24.2751	23.5261	23.1219
P27348	YWHAQ	3.4833	2.67795	10	27.1148	26.9836	26.6569	24.1117	24.6134	23.9963
Q14739	LBR	3.25159	2.707	10	26.8774	26.4892	26.7581	24.491	23.7507	23.7619
Q5BKZ1	ZNF326	3.88393	2.70994	10	24.9077	25.1439	25.0291	22.0423	22.2703	22.6384
Q8WWM7	ATXN2L	2.36752	2.75473	10	24.7391	24.649	24.6409	22.3188	22.4623	20.9837
P61221	ABCE1	2.76376	2.7886	10	26.1449	26.0098	25.9598	23.3416	23.8387	22.5685
P25705	ATP5F1A	4.12333	2.89124	10	28.8019	28.586	28.333	25.7273	25.4775	25.8424
Q8NI36	WDR36	4.12969	2.93168	10	24.9898	25.1112	24.5964	22.0196	22.0728	21.8099
P49790	NUP153	2.22922	3.02371	10	24.0589	24.1964	23.9455	20.4824	20.4824	22.165
Q9H6R4	NOL6	2.93857	3.09328	10	26.1035	26.1102	25.9416	22.2862	23.0322	23.5571
Q12788	TBL3	3.47345	3.14648	10	25.1129	24.4665	24.6328	21.9748	21.3294	21.4686
P51532	SMARCA4	2.65425	3.26552	10	25.8132	25.3249	25.1358	22.712	21.3301	22.4353
Q9Y3F4	STRAP	3.65325	3.29475	10	26.3141	26.3633	26.3124	22.5178	23.3198	23.268
P40939	HADHA	2.51591	3.31117	10	25.3964	25.8467	25.933	22.8129	21.4409	22.9888
P08195	SLC3A2	2.9599	3.40419	10	25.6874	24.5803	25.2786	22.2222	21.3806	21.7309
P07737	PFN1	3.22143	3.40663	10	28.6572	28.5252	28.2278	25.293	25.4705	24.4267
P63104	YWHAZ	3.83111	3.41471	10	27.3081	27.4373	27.2791	23.6883	24.4018	23.6902
Q9P0M6	MACROH2A2	3.66447	3.54236	10	26.4394	26.0219	26.6414	22.531	23.2293	22.7154
Q99623	PHB2	3.96025	4.01895	10	26.5861	26.0726	26.3522	22.5632	22.5099	21.8809
Q9H0D6	XRN2	2.87487	4.44864	10	25.8407	26.2974	26.0539	20.8884	21.2839	22.6737
P49711	CTCF	2.80269	4.52338	10	25.2997	24.6455	24.3433	21.28	19.7216	19.7168
P06576	ATP5F1B	3.9462	5.10384	10	28.1606	27.727	27.5651	22.9761	23.0275	22.1376
O95202	LETM1	2.29464	5.66661	10	25.7771	25.6898	24.8347	21.7092	18.7963	18.7963
P42858	HTT	4.27301	9.92045	10	24.0972	24.5083	22.7088	13.851	13.851	13.851
Q5VZL5	ZMYM4	5.3144	9.96984	10	23.2763	24.3086	23.8775	13.851	13.851	13.851
Q9Y3T9	NOC2L	4.02278	1.77476	11	26.4974	26.638	26.8743	24.8504	24.9346	24.9003
P49588	AARS1	2.48752	2.04151	11	24.5201	24.5763	24.7251	23.0702	21.9766	22.6502
Q92973	TNPO1	2.56463	2.10974	11	26.8379	26.394	25.9128	24.2129	24.6005	24.002
P12268	IMPDH2	4.61752	2.27141	11	26.2606	26.0059	25.9929	23.9174	23.7882	23.7395
P15880	RPS2	4.40915	2.32154	11	28.2608	28.2854	28.0604	26.0549	25.7338	25.8532
P04843	RPN1	3.77657	2.32401	11	26.7498	26.6569	26.5822	24.5166	24.4875	24.0127
P07900	HSP90AA1	3.67315	2.33195	11	27.9368	28.3106	27.9032	25.5833	25.9706	25.6008
P63244	RACK1	3.5522	2.36784	11	27.4018	27.5843	27.7078	24.8476	25.4214	25.3214
P07195	LDHB	4.2757	2.40648	11	29.862	29.625	29.5204	27.406	27.2691	27.1129
Q9Y4W2	LAS1L	2.27831	2.44214	11	25.7809	25.5394	24.8746	23.4844	23.0899	22.2942
Q9NZI8	IGF2BP1	3.27005	2.46862	11	27.77	27.3393	27.471	25.3175	24.6466	25.2102
P31689	DNAJA1	2.47119	2.48005	11	26.9913	26.6488	26.1465	24.5326	24.3123	23.5017
Q7Z406	MYH14	4.4159	2.54203	11	25.2503	25.1352	25.4423	22.8904	22.572	22.7394
P20042	EIF2S2	4.99459	2.60666	11	26.6101	26.5702	26.6062	23.8214	24.0012	24.1439
Q5SSJ5	HP1BP3	3.01466	2.69979	11	27.1457	26.2414	26.2069	23.919	23.7622	23.8133
Q99714	HSD17B10	4.8128	2.85884	11	26.5928	26.6555	26.4869	23.9261	23.6304	23.6021
Q96PK6	RBM14	4.01109	2.86612	11	27.2207	27.0662	26.961	24.385	24.3819	23.8826
Q08945	SSRP1	3.23486	2.87263	11	27.9346	28.2236	27.9567	25.2603	25.5869	24.6498
P57678	GEMIN4	3.23307	2.9795	11	26.0967	25.8998	25.1434	22.891	22.6524	22.658
P26599	PTBP1	2.68986	3.22891	11	28.0655	27.6555	27.7455	24.708	23.7887	25.2832
P18754	RCC1	3.29608	3.25771	11	27.9507	27.825	27.7056	24.2572	25.1874	24.2636
Q14C86	GAPVD1	4.1705	3.46903	11	24.3713	23.9864	24.1797	21.0477	20.5413	20.5413
P18206	VCL	2.00174	3.5435	11	25.3561	25.5187	24.6915	20.2236	22.6112	22.101
O15371	EIF3D	3.38315	3.66529	11	27.5384	27.1003	27.0631	24.142	23.1151	23.4488
P07237	P4HB	4.86848	3.70052	11	26.6178	26.8774	26.494	22.8974	22.8517	23.1384
Q9H2G2	SLK	2.90443	3.74284	11	25.0602	24.1723	24.454	21.0038	21.3633	20.0909
Q6PKG0	LARP1	3.17243	3.99067	11	24.7353	24.2708	25.0952	20.9215	20.0385	21.1694
Q13435	SF3B2	3.1625	4.09261	11	24.107	23.636	24.2611	19.5207	19.5207	20.6849
P27797	CALR	3.36088	7.01227	11	26.3039	25.7683	24.5197	18.1287	18.1287	19.2976
P78316	NOP14	4.10064	1.86889	12	25.7001	25.8656	25.7636	23.9062	23.7305	24.0859
Q99613	EIF3C	3.5444	1.96793	12	25.9003	26.2932	26.1376	23.9045	24.2824	24.2404
P18124	RPL7	3.84546	2.07631	12	29.2467	29.2262	29.5597	27.2355	27.1155	27.4526
P62280	RPS11	4.11182	2.1402	12	29.2206	28.9485	28.9457	27.0804	26.8136	26.8002
P46781	RPS9	4.10095	2.19362	12	29.2961	29.176	28.9005	27.0496	26.9079	26.8343
Q9UG63	ABCF2	2.59204	2.30762	12	26.5491	25.654	25.5765	23.895	23.5499	23.4118
O94906	PRPF6	2.73283	2.33958	12	25.3481	25.0889	24.3652	22.8359	22.5282	22.4194
P04406	GAPDH	2.91824	2.41972	12	29.9351	29.1872	29.2042	27.3428	26.909	26.8156
Q12931	TRAP1	3.27921	2.48373	12	28.371	27.896	27.7157	25.7722	25.4932	25.2662
P62701	RPS4X	4.98096	2.49584	12	29.6433	29.6203	29.5318	27.1444	26.9403	27.2232
O15226	NKRF	2.45143	2.56758	12	25.9484	26.0769	26.3113	22.7496	24.0616	23.8226
Q14151	SAFB2	3.62878	2.63171	12	26.7719	26.9891	27.2829	24.4096	24.6275	24.1117
Q5VYK3	ECPAS	2.53409	2.68057	12	24.706	24.4539	23.5973	21.7995	21.0882	21.8278
Q9Y2X3	NOP58	3.19702	2.83919	12	27.5866	27.419	26.9609	24.9261	24.1874	24.3355
Q14974	KPNB1	2.81386	2.84505	12	27.6083	26.5228	26.7379	24.3774	24.1418	23.8147
P30101	PDIA3	3.28828	2.86008	12	27.1731	26.8517	26.2383	23.8482	23.8313	24.0034
O15213	WDR46	3.19521	2.94236	12	26.4133	26.1296	26.0759	23.6648	22.7114	23.4154
Q9BVP2	GNL3	2.60063	2.98444	12	27.7223	27.5707	28.4023	25.019	24.2437	25.4792
O95782	AP2A1	3.58548	3.04906	12	24.7742	24.1569	24.2789	21.137	21.6758	21.2501
Q9BVJ6	UTP14A	3.36679	3.19417	12	25.058	24.6127	24.6262	21.2029	22.0728	21.4386
Q14498	RBM39	3.84273	3.24276	12	27.8919	27.7391	27.3351	24.4777	24.6465	24.1137
Q13823	GNL2	2.29307	3.24603	12	26.7816	26.408	25.4808	23.0791	23.6768	22.1764
P45880	VDAC2	4.85409	3.2852	12	29.082	28.9246	29.0199	25.741	25.5071	25.9227
P38159	RBMX	3.70296	3.37494	12	28.6226	28.3026	27.9479	25.0194	25.1443	24.5846
O00411	POLRMT	2.27933	3.42291	12	25.4166	25.2529	24.484	22.6716	21.4044	20.8087
Q99459	CDC5L	4.4503	3.6822	12	25.8935	25.911	25.6731	22.4226	21.8501	22.1583
Q8NE71	ABCF1	2.59949	3.79519	12	25.496	25.5437	24.9994	21.2395	20.8208	22.5932
P07910	HNRNPC	4.02016	3.90139	12	29.1496	28.8348	28.5902	25.3145	24.8778	24.6781
P04075	ALDOA	4.09346	3.99422	12	28.4381	28.5107	28.1831	24.0402	24.7991	24.3099
P06733	ENO1	5.13749	4.12038	12	30.62	30.2041	30.3936	26.4122	26.1915	26.2528
Q15029	EFTUD2	3.06121	4.22908	12	25.09	25.5964	25.3842	21.6609	20.233	21.4894
Q13428	TCOF1	3.9354	4.25084	12	26.3883	26.0475	26.3287	22.4544	22.0169	21.5408
P31939	ATIC	2.9773	4.51845	12	25.2789	25.38	24.7416	21.4432	20.6667	19.7353
P52701	MSH6	2.57273	4.74981	12	26.7743	25.0332	24.4507	20.3539	20.8418	20.8131
O43175	PHGDH	3.47673	1.75542	13	27.3794	27.4184	27.0923	25.4315	25.7692	25.4231
P46777	RPL5	4.76614	1.85034	13	29.1799	29.0304	28.9233	27.1908	27.2248	27.1669
O95373	IPO7	2.94929	1.92728	13	26.7009	25.9943	26.2458	24.4258	24.5408	24.1926
P26641	EEF1G	5.39325	2.07619	13	28.1779	28.331	28.3703	26.2344	26.217	26.1992
Q8N1F7	NUP93	3.56342	2.19004	13	26.5039	26.2645	26.0351	24.3205	23.9422	23.9707
P54577	YARS1	2.92985	2.26817	13	26.1841	25.8548	26.0758	23.82	24.1884	23.3019
O95347	SMC2	2.78274	2.34408	13	25.5586	25.2954	25.4614	23.5502	22.5264	23.2066
P47897	QARS1	3.82012	2.53153	13	25.6725	25.8649	25.3637	23.2816	22.9119	23.113
Q9UQ80	PA2G4	3.55822	2.56819	13	27.5201	27.7775	27.5806	25.4237	25.0127	24.7373
Q02878	RPL6	5.18762	2.5874	13	30.6089	30.4411	30.5981	28.0414	27.8361	28.0083
P39023	RPL3	4.22557	2.7573	13	29.7758	29.512	29.3415	26.965	26.7212	26.6713
O00567	NOP56	4.41929	2.84777	13	27.4416	27.2158	27.0795	24.2147	24.5462	24.4326
P48643	CCT5	3.0978	2.85105	13	27.0131	26.7205	26.4859	23.8748	24.3675	23.4239
O00410	IPO5	2.93653	2.86238	13	26.1573	26.4145	26.3419	23.7947	23.763	22.7689
Q01780	EXOSC10	4.50546	2.86665	13	26.0891	25.8093	25.6745	23.0922	22.8751	23.0057
P13010	XRCC5	4.65188	2.90337	13	27.0835	26.9257	26.8696	24.2367	23.855	24.077
O76094	SRP72	3.25166	3.0191	13	25.9359	25.8437	26.1259	23.0321	22.4109	23.4052
Q9Y265	RUVBL1	2.35121	3.04501	13	26.7096	26.479	25.8065	23.8855	23.5738	22.4008
O75400	PRPF40A	3.66584	3.19172	13	26.0104	25.7238	26.0364	22.9161	22.2771	23.0023
O60841	EIF5B	4.41386	3.39683	13	25.8727	26.0823	25.6255	22.6772	22.3998	22.313
Q14203	DCTN1	3.8052	3.55796	13	24.7672	24.9499	24.6746	21.5104	21.454	20.7535
Q14146	URB2	2.73645	3.83202	13	24.9845	24.7275	25.2662	20.5899	20.7384	22.1538
P62258	YWHAE	4.08638	3.91778	13	28.5878	27.9958	28.0359	24.5776	24.1609	24.1277
P19338	NCL	5.7119	4.0423	13	28.9309	28.8308	28.757	24.9309	24.6472	24.8137
Q96KR1	ZFR	2.00935	4.14587	13	25.8698	25.4256	25.0897	21.9664	22.3804	19.6006
Q14966	ZNF638	8.35123	11.4318	13	25.387	25.2811	25.1803	13.851	13.851	13.851
Q8WUM4	PDCD6IP	2.51881	1.44903	14	26.4398	25.8118	26.156	24.9313	24.4687	24.6605
Q86XP3	DDX42	2.45228	2.14067	14	23.7337	24.1604	23.5045	22.0987	21.7654	21.1123
P62424	RPL7A	4.65332	2.205	14	29.2955	29.253	29.5572	27.195	27.1673	27.1285
P40227	CCT6A	4.1045	2.25036	14	28.1633	27.9624	27.8629	25.9511	25.6687	25.6177
Q93008	USP9X	4.82994	2.30921	14	25.6374	25.8397	25.7773	23.5141	23.3031	23.5095
P61247	RPS3A	3.96637	2.33931	14	28.2352	28.7161	28.3977	26.0334	26.0689	26.2287
P43243	MATR3	3.509	2.6645	14	27.8983	27.6289	27.4103	25.012	24.6557	25.2764
P31948	STIP1	4.5354	2.72424	14	27.458	27.6818	27.255	24.8019	24.7426	24.6777
Q14692	BMS1	2.95359	2.79253	14	26.417	25.8746	26.2017	23.9585	23.1117	23.0456
P22626	HNRNPA2B1	5.05309	2.92542	14	29.4384	29.4809	29.3638	26.3165	26.6389	26.5514
P49411	TUFM	5.17241	3.03382	14	28.0469	27.8077	27.8593	24.7367	24.9358	24.9398
Q9HAV4	XPO5	3.27394	3.08249	14	25.8905	25.8652	25.3386	22.4942	23.0874	22.2652
O15042	U2SURP	4.95493	3.09859	14	26.9355	26.8877	26.7823	23.8107	23.5708	23.9283
O75694	NUP155	3.10788	3.60661	14	26.0064	25.8233	26.4782	22.9587	21.8314	22.6981
P33992	MCM5	2.92853	3.70607	14	26.1796	25.6165	25.7305	21.6398	21.8077	22.9608
O00541	PES1	2.46803	3.75651	14	27.4512	27.1087	27.1529	24.4288	22.3856	23.6288
P49321	NASP	2.26682	4.31951	14	26.1399	26.1383	25.1343	22.2446	22.1518	20.0576
P00558	PGK1	3.86778	4.47585	14	28.0764	27.9579	27.4665	23.7719	22.9118	23.3896
P23396	RPS3	3.75767	1.87139	15	29.8366	29.8834	29.6176	28.0911	27.7048	27.9275
Q9Y2L1	DIS3	3.36807	2.33911	15	26.4255	26.3229	26.2223	24.1773	23.5648	24.2113
P23246	SFPQ	3.37456	2.45203	15	28.2879	27.8983	27.7004	25.8035	25.4049	25.3221
Q9NRL2	BAZ1A	2.16145	2.47055	15	25.6715	24.2653	25.131	23.0342	22.1644	22.4576
P11387	TOP1	3.83558	2.55255	15	27.7797	27.7188	27.5962	25.4827	24.913	25.0414
P78371	CCT2	4.40596	2.57583	15	27.9082	27.7088	27.706	24.9899	25.2301	25.3755
Q03701	CEBPZ	3.1211	2.76606	15	26.3794	26.1457	25.4354	23.271	23.351	23.0403
P35251	RFC1	3.96539	2.81786	15	24.885	25.3709	24.9548	22.1177	22.1782	22.4612
P12956	XRCC6	2.70397	2.94899	15	28.4686	28.0511	27.8642	25.9049	24.9301	24.702
Q9UKV3	ACIN1	3.13183	3.03143	15	26.9469	26.3228	26.4855	23.9313	23.69	23.0397
O60506	SYNCRIP	2.51879	3.07054	15	28.1514	27.8029	27.657	25.3325	25.1733	23.8938
P38919	EIF4A3	4.92971	3.15126	15	26.9007	26.7898	26.6283	23.5018	23.7927	23.5705
Q9GZR7	DDX24	2.44581	3.20272	15	26.0351	25.4977	25.4668	21.5261	22.6948	23.1705
P11021	HSPA5	5.48777	3.29019	15	28.1196	27.975	27.8617	24.7935	24.6514	24.641
P25205	MCM3	3.22133	3.35445	15	25.747	26.0463	26.2398	22.7257	22.0889	23.1551
Q9H307	PNN	3.62514	3.50025	15	27.1465	26.9713	26.7487	23.2055	23.1935	23.9667
Q8NC51	SERBP1	3.16314	3.70633	15	27.7625	27.473	26.796	24.1106	23.609	23.1929
Q13263	TRIM28	4.0511	4.5794	15	27.6005	27.3189	26.9467	22.7954	22.3027	23.0299
P13667	PDIA4	2.81587	5.18431	15	26.6623	26.2402	26.7739	21.6778	20.1226	22.323
O43242	PSMD3	4.85337	1.96242	16	27.4526	27.6384	27.4977	25.6689	25.5406	25.4919
Q9P2J5	LARS1	4.27181	2.1589	16	26.4923	26.5861	26.612	24.179	24.5127	24.5221
P49736	MCM2	2.20903	2.29706	16	26.3142	26.4703	26.8635	23.6243	24.1275	25.0049
P53618	COPB1	2.34517	2.37801	16	26.7429	26.6792	26.108	24.4144	24.5652	23.4165
P08238	HSP90AB1	3.81303	2.5122	16	31.1515	30.6013	30.6807	28.4023	28.2152	28.2794
Q07065	CKAP4	2.22536	2.53159	16	26.1345	25.9768	25.0863	23.3246	23.7265	22.5518
Q9BUQ8	DDX23	2.37637	2.59804	16	26.4629	25.7354	25.5208	23.6257	23.6674	22.6318
P36578	RPL4	3.9881	2.61824	16	31.4973	31.2879	30.9746	28.6223	28.7717	28.5112
O43143	DHX15	3.39145	2.75693	16	27.5919	27.1919	26.8858	24.6468	24.5834	24.1685
Q14684	RRP1B	3.548	2.85177	16	26.9267	26.4633	26.3508	24.0498	23.5374	23.5983
P51610	HCFC1	3.44369	2.91483	16	25.7931	25.5761	25.8936	22.3975	22.8876	23.2332
O43390	HNRNPR	3.1634	2.91586	16	28.6267	28.0938	27.7827	25.6035	25.1653	24.9869
Q9NVP1	DDX18	4.11022	3.02743	16	27.6843	27.5371	27.6364	24.6924	24.2468	24.8362
Q9Y2W1	THRAP3	4.67798	3.05871	16	27.411	26.9553	27.1415	24.1301	24.095	24.1066
O43795	MYO1B	4.05248	4.02304	16	25.9247	25.5347	25.1929	21.452	21.7907	21.3406
Q99832	CCT7	4.44102	2.05789	17	28.398	28.1933	28.1822	26.3327	26.0744	26.1928
P49368	CCT3	3.6426	2.30134	17	27.8899	27.7626	28.2419	25.8769	25.4925	25.621
P33993	MCM7	3.76144	2.47482	17	27.082	27.0559	26.7498	24.194	24.6756	24.5937
P14866	HNRNPL	3.88353	2.56894	17	28.1754	27.8126	27.595	25.3841	25.2854	25.2066
Q15424	SAFB	3.36377	2.7018	17	28.7947	28.4333	28.4476	26.2833	25.5292	25.7577
Q9UQE7	SMC3	3.07609	3.34286	17	25.979	25.3157	25.2295	22.6867	21.7031	22.1058
O14617	AP3D1	3.25883	3.61625	17	26.9158	26.6718	25.8519	23.1822	22.7443	22.6643
P21796	VDAC1	3.12983	5.36701	17	29.1403	29.1538	28.8018	24.6073	23.7341	22.6536
P17844	DDX5	4.49976	1.9494	18	29.0464	29.1312	28.8878	27.1083	26.9537	27.1552
P50990	CCT8	4.36651	2.17698	18	28.3886	28.4243	28.1856	26.0507	26.0921	26.3248
O14980	XPO1	5.21329	2.21128	18	27.3688	27.4234	27.3852	25.0895	25.1388	25.3152
Q86VP6	CAND1	3.39104	2.3583	18	28.79	28.2512	28.2314	26.1887	26.1761	25.833
P46940	IQGAP1	3.13627	2.55033	18	25.5921	25.553	25.5459	23.2341	22.4713	23.3347
Q9UIG0	BAZ1B	3.30217	2.70154	18	27.3766	26.8596	26.8387	24.5865	24.4391	23.9447
Q7KZF4	SND1	3.29659	2.93907	18	27.1486	26.8162	26.2315	23.8809	23.9037	23.5945
O60287	URB1	3.3621	2.98142	18	25.6925	25.8083	25.086	22.2754	22.5178	22.8494
Q9NYF8	BCLAF1	6.15	3.32819	18	27.7697	27.7976	27.6859	24.4628	24.4857	24.3201
Q01082	SPTBN1	2.8261	3.90988	18	25.2517	24.9271	24.62	20.0946	21.6175	21.357
Q8WYP5	AHCTF1	2.67183	4.15375	18	25.8364	25.3624	25.6623	21.0807	20.7264	22.5928
P55072	VCP	2.49983	6.40338	18	26.867	26.8677	26.8528	19.4497	22.4781	19.4497
Q92841	DDX17	3.19521	1.97897	19	30.0603	29.4236	29.5141	27.7821	27.6364	27.6426
O00571	DDX3X	3.79804	2.00838	19	28.8735	28.609	28.8051	26.9578	26.5363	26.7684
P16615	ATP2A2	5.15615	2.26907	19	27.603	27.5003	27.5021	25.2995	25.3608	25.1379
Q92945	KHSRP	4.7755	2.28864	19	27.2249	27.1318	27.0992	24.6981	24.987	24.9049
P22314	UBA1	3.34398	2.36229	19	28.3674	28.2347	27.9124	26.1185	25.8072	25.5019
O60264	SMARCA5	4.05824	2.4238	19	27.0508	27.3545	27.0533	24.5106	24.8814	24.7952
P26640	VARS1	3.87806	2.58066	19	26.4954	25.9431	26.3953	23.7469	23.5893	23.7555
Q9BZE4	GTPBP4	3.23137	2.62764	19	28.1247	27.7079	27.7315	25.5035	25.4046	24.7731
Q8IY81	FTSJ3	2.56729	2.66508	19	28.7702	28.1528	27.9485	26.2521	25.409	25.2151
P54886	ALDH18A1	4.09023	2.86685	19	27.1183	27.2155	27.2793	24.0656	24.3008	24.6462
P61978	HNRNPK	3.33498	2.88792	19	30.272	29.6827	29.5148	27.2331	26.8263	26.7464
O14654	IRS4	3.91443	3.14966	19	27.3623	27.1943	27.236	23.7447	24.1386	24.4603
P55265	ADAR	3.33173	3.1675	19	26.1318	25.1864	25.7542	22.6899	22.6011	22.2789
Q15233	NONO	3.37107	3.17441	19	29.8986	29.7931	29.7368	26.9559	26.8966	26.0528
P14625	HSP90B1	3.94755	3.40956	19	27.8647	27.7478	27.4718	24.118	24.6718	24.0659
Q99575	POP1	5.25444	3.65393	19	26.122	26.3028	26.1799	22.4878	22.4117	22.7433
Q5T4S7	UBR4	3.2381	3.77324	19	24.8291	25.2232	24.7391	20.4602	21.5577	21.4538
A5YKK6	CNOT1	3.3368	3.94829	19	25.4351	25.3239	25.4248	21.7712	20.7016	21.8661
P11586	MTHFD1	2.94206	1.73132	20	28.3052	27.6261	27.7584	26.1453	26.1631	26.1874
P54136	RARS1	5.3644	1.85404	20	27.1964	27.2736	27.1199	25.3874	25.3571	25.2833
P55060	CSE1L	2.84367	1.91371	20	28.0096	27.7275	27.8235	26.394	25.6514	25.7742
P13797	PLS3	3.38401	2.43002	20	28.2273	28.0791	27.9183	26.0463	25.3641	25.5243
O75534	CSDE1	2.8405	2.54887	20	26.7619	26.3589	25.669	23.6068	23.7003	23.8361
P53621	COPA	3.70094	2.60024	20	28.1461	28.1169	27.6873	25.2221	25.6472	25.2803
P17987	TCP1	3.31304	2.68156	20	28.4237	28.3242	28.3709	25.178	25.9578	25.9384
O76021	RSL1D1	5.04858	2.8865	20	29.7114	29.6728	29.7343	26.9102	26.621	26.9277
Q8TDD1	DDX54	3.61699	3.03929	20	27.22	26.7641	26.7787	23.8144	23.585	24.2455
Q9Y4A5	TRRAP	2.95377	3.47704	20	26.0101	26.1009	24.8961	21.8949	22.3701	22.3109
P12270	TPR	4.66863	3.68518	20	25.0171	25.2074	25.0556	21.235	21.2828	21.7067
P26358	DNMT1	3.24275	3.69426	20	25.8968	25.1627	25.7344	21.3137	22.2564	22.1411
P10809	HSPD1	4.3767	3.85893	20	29.911	29.8813	29.4055	26.0743	25.8662	25.6806
P14618	PKM	3.6507	2.17925	21	29.9814	29.6994	29.6494	27.8699	27.4937	27.4289
Q7L2E3	DHX30	3.57076	2.19049	21	27.3163	26.9576	26.8792	25.0895	24.6762	24.816
Q9Y5B9	SUPT16H	3.94587	2.48667	21	28.4862	28.5077	28.531	26.2585	25.7052	26.1012
Q96GQ7	DDX27	4.76705	2.57839	21	27.4015	27.568	27.2683	24.7438	24.8073	24.9514
P52272	HNRNPM	3.45629	2.64609	21	28.7096	28.7835	28.321	25.8678	26.3149	25.6931
Q00839	HNRNPU	4.19163	2.84342	21	31.3069	31.3805	31.1519	28.6578	28.4984	28.1527
Q15021	NCAPD2	3.06175	2.88414	21	26.6267	26.061	25.8615	23.1381	23.7476	23.0112
O75691	UTP20	3.58268	2.93536	21	26.8861	26.7944	26.546	24.2409	23.5432	23.6363
P11142	HSPA8	3.74831	2.95967	21	30.824	30.7909	30.5389	27.9282	27.9896	27.3571
Q7L014	DDX46	4.37784	3.49556	21	27.1215	26.9825	26.9842	23.2562	23.4895	23.8559
P11498	PC	3.52352	1.14241	22	28.0913	28.0445	27.7861	26.8679	26.8316	26.7953
Q04637	EIF4G1	2.79802	1.98599	22	26.9659	26.5656	26.6398	25.1967	24.4875	24.529
P08670	VIM	3.12171	2.06206	22	29.4668	29.2807	29.0285	27.4618	27.2821	26.8459
P53396	ACLY	4.19483	2.49271	22	27.8253	27.5365	27.4225	24.9474	25.1583	25.2005
Q9Y490	TLN1	2.74261	2.49788	22	25.6194	25.4337	25.0787	22.2919	23.2755	23.0709
P41252	IARS1	2.95434	2.52376	22	28.0138	27.0879	27.2636	24.8495	25.1318	24.8128
P46087	NOP2	3.92971	2.88052	22	29.3055	29.0085	28.7523	26.3259	26.1479	25.9509
Q15149	PLEC	4.65423	4.58988	22	24.8343	24.3764	24.2903	19.7998	19.7998	20.1318
Q16891	IMMT	2.91918	1.56279	23	27.9461	27.9501	27.5117	26.3201	26.4013	25.9981
Q14152	EIF3A	3.63171	2.37062	23	27.2961	27.3319	27.2103	24.5407	25.0498	25.136
Q14683	SMC1A	2.97751	2.45441	23	26.935	26.6386	26.4955	24.6764	24.2476	23.7818
Q5JTH9	RRP12	3.02765	2.53454	23	28.1104	27.9502	27.6546	25.5124	25.7272	24.8719
P27708	CAD	3.34673	2.83171	23	26.4624	26.7434	26.2066	23.2261	23.725	23.966
O75369	FLNB	2.1997	3.78578	23	26.1038	25.7634	25.7893	21.566	23.5123	21.2208
Q13813	SPTAN1	3.40341	4.51363	23	25.5997	24.5036	25.3931	20.4135	20.4135	21.1286
Q5UIP0	RIF1	3.02339	4.83362	23	26.0886	25.3282	24.6472	21.0967	20.6214	19.845
P05023	ATP1A1	5.26409	2.32682	24	27.8376	27.6846	27.915	25.5112	25.437	25.5085
P11388	TOP2A	3.94301	2.56755	24	28.6036	28.3203	28.2868	26.0903	25.6157	25.8021
P34932	HSPA4	2.71853	3.54224	24	26.5649	26.5609	26.6333	22.6401	24.0144	22.4779
P20700	LMNB1	5.06352	3.35593	25	29.6219	29.6992	29.446	26.3641	26.2725	26.0627
P27816	MAP4	4.6788	3.27256	26	27.7856	27.8179	27.4571	24.4682	24.5229	24.2518
Q9UQ35	SRRM2	4.2653	4.08837	26	28.4324	28.6677	28.4404	24.0207	24.5184	24.7362
Q12906	ILF3	4.29874	3.70046	27	29.5068	29.3546	29.1038	25.9205	25.5787	25.3645
Q14676	MDC1	3.32054	5.859	27	26.8003	26.5634	26.2708	19.8844	20.4578	21.7152
P42704	LRPPRC	3.27101	2.01459	28	27.7189	27.946	27.367	25.5237	25.8708	25.5938
P07814	EPRS1	3.17651	2.23038	28	27.8615	27.4506	27.2867	25.5091	25.4072	24.9913
Q00610	CLTC	2.97759	2.39892	28	29.1609	28.6915	28.5061	26.7501	26.3689	26.0428
P38646	HSPA9	4.80698	2.98205	28	28.7014	28.5688	28.481	25.7848	25.586	25.4342
P49792	RANBP2	4.11107	3.24442	28	27.2474	27.1942	26.9258	24.0631	24.0294	23.5418
Q08211	DHX9	3.83712	2.20572	29	29.5523	29.2912	29.1812	27.2326	27.2598	26.915
P15924	DSP	2.96356	2.45213	30	26.5586	26.3937	25.867	23.8762	24.1418	23.4448
Q4VCS5	AMOT	4.02593	2.80143	30	29.5677	29.1841	28.997	26.5488	26.35	26.4458
P13639	EEF2	4.28451	2.15038	31	30.5529	30.3493	30.2111	28.2975	28.2674	28.0973
O75643	SNRNP200	3.81452	2.68727	31	28.2249	27.9868	27.6905	25.4921	25.0967	25.2516
Q92621	NUP205	3.25951	2.92338	31	28.6127	28.1651	27.6366	25.3551	25.1377	25.1514
O75533	SF3B1	3.5102	2.26221	32	28.2891	27.7204	28.0471	25.9148	25.5651	25.7901
Q9BQG0	MYBBP1A	4.04189	3.3397	32	29.2271	28.6408	28.6548	25.6586	25.46	25.3849
P21333	FLNA	4.19408	3.4868	32	27.0693	26.9058	26.9598	23.8057	23.5329	23.1359
Q14690	PDCD11	3.33061	2.3579	34	28.2305	28.1619	28.1637	25.4653	25.7812	26.2359
Q14839	CHD4	2.8764	2.5985	35	27.9505	27.8726	27.5619	24.7287	25.0976	25.7632
P09874	PARP1	4.28016	2.03169	36	30.3477	30.1314	30.0462	28.2638	28.1274	28.039
Q9NR30	DDX21	5.17257	2.85173	36	30.7617	30.6977	30.4919	27.8281	27.7106	27.8575
Q6P2Q9	PRPF8	3.34693	2.36691	39	28.7861	28.4285	28.5203	26.2861	26.5074	25.8406
Q9H583	HEATR1	3.65008	2.85463	39	28.4379	28.2741	27.975	25.6504	25.4367	25.036
P35580	MYH10	4.79368	2.7071	42	28.6414	28.6118	28.3758	25.7264	25.9681	25.8132
Q92616	GCN1	3.17272	2.56707	43	28.3167	28.258	28.0739	26.1655	25.4183	25.3636
P35579	MYH9	3.65415	2.70519	53	29.5986	29.2523	29.2991	27.0326	26.5831	26.4189
Q14980	NUMA1	4.94748	2.73321	57	28.4151	28.4471	28.434	25.6668	25.8877	25.5421
P49327	FASN	5.38056	2.46971	67	30.7587	30.64	30.5797	28.2792	28.1137	28.1763
P46013	MKI67	4.06017	3.14598	73	29.0603	29.109	29.0934	26.0215	26.232	25.5712
Q14204	DYNC1H1	4.56829	2.60955	88	29.8449	29.6707	29.5394	27.2159	27.0785	26.9319
P78527	PRKDC	4.78156	2.62324	108	31.5976	31.3804	31.2485	28.8441	28.7276	28.7851
