# Supplementary material for: An approach for the systematic profiling of drug-induced remodeling of RNA–RBP (RNA-binding protein) interactions
Source: Royal Society of Chemistry journal article supplement (doi:10.1039/d6ra00871b), 2026-05-19
Supplement: d6ra00871b8.xlsx [file d6ra00871b8.xlsx]

## Sheet: Table S8
Table S8. List of identified proteins from risdiplam-treated and untreated HEK293T cells
Uniprot accession	Gene Symbol	Non treatment	Drug treatment
A0A024RBG1	NUDT4B	√	√
A0A075B6L6	TRBV7-3	√	√
A0A096LP01	SMIM26	√
A0A0B4J2F0	PIGBOS1	√	√
A0A0U1RRE5	NBDY	√	√
A0A0U1RRL7	MMP24OS	√	√
A0A1W2PQ72	MSANTD7	√	√
A0A2R8Y4L2	HNRNPA1L3	√	√
A0A2Z4LIS9	FOXO3B	√	√
A0A3B3IU46	RAMACL	√	√
A0AV96	RBM47	√	√
A0AVF1	IFT56	√	√
A0AVT1	UBA6	√	√
A0FGR8	ESYT2	√	√
A0JNW5	BLTP3B	√	√
A0MZ66	SHTN1	√	√
A0PJW6	TMEM223	√	√
A0PK00	TMEM120B	√	√
A1A4S6	ARHGAP10	√
A1KXE4	FAM168B	√	√
A1L020	MEX3A	√	√
A1L0T0	ILVBL	√	√
A1L170	C1orf226	√	√
A1L188	NDUFAF8	√	√
A1L390	PLEKHG3	√	√
A1L3X0	ELOVL7	√	√
A1X283	SH3PXD2B	√	√
A1XBS5	CIBAR1	√
A2A3K4	PTPDC1	√
A2RRD8	ZNF320	√	√
A2RRP1	NBAS	√	√
A2RTX5	TARS3	√	√
A2RU67	FAM234B	√	√
A2RUB1	MEIOC	√
A2RUC4	TYW5	√	√
A2RUS2	DENND3	√
A2VDF0	FUOM	√
A2VDJ0	TMEM131L	√	√
A3KMH1	VWA8	√	√
A3KN83	SBNO1	√	√
A4D1E9	GTPBP10	√	√
A4D1P6	WDR91	√	√
A4D1S0	KLRG2	√	√
A4D1U4	DENND11	√	√
A5A3E0	POTEF	√	√
A5D8V6	VPS37C	√	√
A5PL33	KRBA1	√
A5PLL7	PEDS1	√	√
A5PLN9	TRAPPC13	√	√
A5YKK6	CNOT1	√	√
A6H8Y1	BDP1	√	√
A6NCE7	MAP1LC3B2	√	√
A6NDB9	PALM3	√	√
A6NDG6	PGP	√	√
A6NDU8	RIMOC1	√	√
A6NED2	RCCD1	√	√
A6NFI3	ZNF316	√	√
A6NFN3	RBFOX3	√	√
A6NFY7	SDHAF1	√	√
A6NGB9	WIPF3	√	√
A6NHL2	TUBAL3	√	√
A6NHQ2	FBLL1	√	√
A6NHR9	SMCHD1	√	√
A6NHX0	CASTOR2	√	√
A6NIH7	UNC119B	√	√
A6NJ78	METTL15	√	√
A6NJT0	UNCX	√	√
A6NK58	LIPT2	√	√
A6NKD9	CCDC85C	√	√
A6NKF1	SAC3D1	√	√
A6NKF2	ARID3C	√
A6NNL5	C15orf61	√
A6NNY8	USP27X	√	√
A6PVS8	LRRIQ3	√
A6QL63	ABTB3	√	√
A6ZKI3	RTL8C	√	√
A7E2V4	ZSWIM8	√
A7MCY6	TBKBP1	√	√
A8CG34	POM121C	√	√
A8K0R7	ZNF839	√
A8K855	EFCAB7	√	√
A8MPP1	DDX11L8	√	√
A8MPS7	YDJC	√	√
A8MT69	CENPX	√	√
A8MTT3	CEBPZOS	√	√
A8MVW0	FAM171A2	√	√
A8MW92	PHF20L1	√
A8MWD9	SNRPGP15	√	√
A8MWY0	ELAPOR2	√	√
A8MXV4	NUDT19	√	√
A9UHW6	MIF4GD	√	√
B2RBV5	MRFAP1L2	√	√
B2RUZ4	SMIM1	√
B7ZAP0	RABGAP1L	√	√
B7ZAQ6	GPR89A	√	√
C0HMD6	PIDD1	√
C4AMC7	WASH3P	√	√
C9J069	AJM1	√
C9J798	RASA4B	√
C9JLW8	MCRIP1	√	√
C9JRZ8	AKR1B15	√	√
C9JTQ0	ANKRD63	√	√
C9JVW0	INAFM1	√
E9PAV3	NACA	√	√
E9PRG8	C11orf98	√	√
G9CGD6	CNK3/IPCEF1	√
I6L899	GOLGA8R	√	√
K7EIQ3	ZNF561-AS1	√	√
L0R6Q1	SLC35A4	√	√
L0R819	ASDURF	√	√
L0R8F8	MIEF1	√
O00115	DNASE2	√	√
O00116	AGPS	√	√
O00124	UBXN8	√	√
O00139	KIF2A	√	√
O00148	DDX39A	√	√
O00151	PDLIM1	√	√
O00154	ACOT7	√	√
O00159	MYO1C	√	√
O00161	SNAP23	√	√
O00165	HAX1	√	√
O00170	AIP	√	√
O00178	GTPBP1	√	√
O00186	STXBP3	√	√
O00189	AP4M1	√
O00192	ARVCF	√	√
O00193	SMAP	√	√
O00203	AP3B1	√	√
O00213	APBB1	√	√
O00217	NDUFS8	√	√
O00221	NFKBIE	√	√
O00231	PSMD11	√	√
O00232	PSMD12	√	√
O00233	PSMD9	√	√
O00244	ATOX1	√	√
O00255	MEN1	√	√
O00257	CBX4	√	√
O00258	GET1	√	√
O00264	PGRMC1	√	√
O00267	SUPT5H	√	√
O00268	TAF4	√	√
O00273	DFFA	√	√
O00287	RFXAP	√	√
O00291	HIP1	√	√
O00299	CLIC1	√	√
O00303	EIF3F	√	√
O00308	WWP2	√	√
O00311	CDC7	√	√
O00330	PDHX	√	√
O00338	SULT1C2	√
O00399	DCTN6	√	√
O00400	SLC33A1	√	√
O00401	WASL	√	√
O00410	IPO5	√	√
O00411	POLRMT	√	√
O00418	EEF2K	√	√
O00422	SAP18	√	√
O00423	EML1	√	√
O00425	IGF2BP3	√	√
O00429	DNM1L	√	√
O00442	RTCA	√	√
O00443	PIK3C2A	√	√
O00458	IFRD1	√	√
O00459	PIK3R2	√	√
O00461	GOLIM4	√	√
O00468	AGRN	√	√
O00469	PLOD2	√	√
O00470	MEIS1	√	√
O00471	EXOC5	√	√
O00479	HMGN4	√	√
O00483	NDUFA4	√	√
O00487	PSMD14	√	√
O00488	ZNF593	√	√
O00499	BIN1	√	√
O00505	KPNA3	√	√
O00506	STK25	√	√
O00512	BCL9	√	√
O00522	KRIT1	√	√
O00541	PES1	√	√
O00559	EBAG9	√	√
O00560	SDCBP	√	√
O00566	MPHOSPH10	√	√
O00567	NOP56	√	√
O00571	DDX3X	√	√
O00584	RNASET2	√	√
O00592	PODXL	√	√
O00625	PIR	√	√
O00628	PEX7	√	√
O00629	KPNA4	√	√
O00716	E2F3	√	√
O00743	PPP6C	√	√
O00746	NME4	√	√
O00750	PIK3C2B	√	√
O00754	MAN2B1	√	√
O00762	UBE2C	√	√
O00763	ACACB	√
O00764	PDXK	√	√
O00767	SCD	√	√
O14494	PLPP1	√	√
O14495	PLPP3	√	√
O14497	ARID1A	√	√
O14519	CDK2AP1	√	√
O14521	SDHD	√	√
O14523	C2CD2L	√	√
O14524	NEMP1	√	√
O14530	TXNDC9	√	√
O14531	DPYSL4	√	√
O14545	TRAFD1	√	√
O14548	COX7A2L	√	√
O14561	NDUFAB1	√	√
O14562	UBFD1	√	√
O14569	CYB561D2	√	√
O14578	CIT	√	√
O14579	COPE	√	√
O14593	RFXANK	√	√
O14595	CTDSP2	√	√
O14613	CDC42EP2	√	√
O14617	AP3D1	√	√
O14618	CCS	√	√
O14628	ZNF195	√
O14639	ABLIM1	√	√
O14640	DVL1	√	√
O14641	DVL2	√	√
O14646	CHD1	√	√
O14647	CHD2	√	√
O14653	GOSR2	√	√
O14654	IRS4	√	√
O14656	TOR1A	√	√
O14657	TOR1B	√	√
O14662	STX16	√	√
O14672	ADAM10	√	√
O14681	EI24	√	√
O14683	TP53I11	√	√
O14686	KMT2D	√	√
O14713	ITGB1BP1	√	√
O14715	RGPD8	√	√
O14717	TRDMT1	√	√
O14727	APAF1	√	√
O14730	RIOK3	√	√
O14732	IMPA2	√	√
O14733	MAP2K7	√	√
O14734	ACOT8	√	√
O14735	CDIPT	√	√
O14737	PDCD5	√	√
O14744	PRMT5	√	√
O14745	NHERF1	√	√
O14746	TERT	√	√
O14757	CHEK1	√	√
O14763	TNFRSF10B	√	√
O14770	MEIS2	√
O14772	FPGT	√	√
O14773	TPP1	√	√
O14776	TCERG1	√	√
O14777	NDC80	√	√
O14782	KIF3C	√	√
O14786	NRP1	√	√
O14787	TNPO2	√	√
O14795	UNC13B	√	√
O14802	POLR3A	√	√
O14810	CPLX1	√	√
O14818	PSMA7	√	√
O14828	SCAMP3	√	√
O14832	PHYH	√	√
O14867	BACH1	√	√
O14874	BCKDK	√	√
O14880	MGST3	√	√
O14893	GEMIN2	√	√
O14907	TAX1BP3	√	√
O14908	GIPC1	√	√
O14910	LIN7A	√	√
O14920	IKBKB	√	√
O14925	TIMM23	√	√
O14929	HAT1	√	√
O14936	CASK	√	√
O14939	PLD2	√	√
O14949	UQCRQ	√	√
O14950	MYL12B	√	√
O14964	HGS	√	√
O14965	AURKA	√	√
O14966	RAB29	√	√
O14967	CLGN	√	√
O14972	VPS26C	√	√
O14974	PPP1R12A	√	√
O14975	SLC27A2	√	√
O14976	GAK	√	√
O14979	HNRNPDL	√	√
O14980	XPO1	√	√
O14981	BTAF1	√	√
O15013	ARHGEF10	√	√
O15014	ZNF609	√	√
O15015	ZNF646	√	√
O15020	SPTBN2	√	√
O15027	SEC16A	√	√
O15031	PLXNB2	√	√
O15037	KHNYN	√	√
O15040	TECPR2	√	√
O15042	U2SURP	√	√
O15047	SETD1A	√	√
O15054	KDM6B	√
O15056	SYNJ2	√	√
O15063	GARRE1	√	√
O15066	KIF3B	√	√
O15067	PFAS	√	√
O15068	MCF2L	√	√
O15075	DCLK1	√	√
O15078	CEP290	√	√
O15084	ANKRD28	√	√
O15085	ARHGEF11	√	√
O15090	ZNF536	√	√
O15091	PRORP	√	√
O15111	CHUK	√	√
O15116	LSM1	√	√
O15118	NPC1	√	√
O15119	TBX3	√	√
O15120	AGPAT2	√	√
O15121	DEGS1	√	√
O15126	SCAMP1	√	√
O15127	SCAMP2	√	√
O15131	KPNA5	√	√
O15143	ARPC1B	√	√
O15144	ARPC2	√	√
O15145	ARPC3	√	√
O15151	MDM4	√
O15155	BET1	√	√
O15160	POLR1C	√	√
O15164	TRIM24	√	√
O15169	AXIN1	√
O15173	PGRMC2	√	√
O15182	CETN3	√	√
O15194	CTDSPL	√	√
O15212	PFDN6	√	√
O15213	WDR46	√	√
O15217	GSTA4	√	√
O15226	NKRF	√	√
O15228	GNPAT	√	√
O15231	ZNF185	√	√
O15234	CASC3	√	√
O15235	MRPS12	√	√
O15243	LEPROT	√	√
O15254	ACOX3	√	√
O15258	RER1	√	√
O15259	NPHP1	√
O15260	SURF4	√	√
O15269	SPTLC1	√	√
O15270	SPTLC2	√	√
O15287	FANCG	√	√
O15294	OGT	√	√
O15304	SIVA1	√	√
O15305	PMM2	√	√
O15315	RAD51B	√
O15318	POLR3G	√	√
O15321	TM9SF1	√	√
O15344	MID1	√	√
O15347	HMGB3	√	√
O15350	TP73	√	√
O15355	PPM1G	√	√
O15357	INPPL1	√	√
O15360	FANCA	√	√
O15371	EIF3D	√	√
O15372	EIF3H	√	√
O15379	HDAC3	√	√
O15381	NVL	√	√
O15382	BCAT2	√	√
O15391	YY2	√	√
O15392	BIRC5	√	√
O15397	IPO8	√	√
O15400	STX7	√	√
O15409	FOXP2	√
O15417	TNRC18	√	√
O15431	SLC31A1	√	√
O15439	ABCC4	√	√
O15440	ABCC5	√	√
O15442	MPPED1	√	√
O15446	POLR1G	√	√
O15460	P4HA2	√	√
O15479	MAGEB2	√	√
O15498	YKT6	√	√
O15504	NUP42	√	√
O15511	ARPC5	√	√
O15514	POLR2D	√	√
O15522	NKX2-8	√	√
O15525	MAFG	√	√
O15527	OGG1	√
O15530	PDPK1	√	√
O15533	TAPBP	√
O15534	PER1	√	√
O15541	RNF113A	√	√
O15550	KDM6A	√	√
O43143	DHX15	√	√
O43148	RNMT	√	√
O43149	ZZEF1	√	√
O43150	ASAP2	√	√
O43156	TTI1	√	√
O43159	RRP8	√	√
O43164	PJA2	√	√
O43166	SIPA1L1	√	√
O43167	ZBTB24	√	√
O43169	CYB5B	√	√
O43172	PRPF4	√	√
O43175	PHGDH	√	√
O43181	NDUFS4	√	√
O43189	PHF1	√
O43237	DYNC1LI2	√	√
O43242	PSMD3	√	√
O43248	HOXC11	√
O43251	RBFOX2	√	√
O43252	PAPSS1	√	√
O43257	ZNHIT1	√
O43264	ZW10	√	√
O43281	EFS	√	√
O43290	SART1	√	√
O43291	SPINT2	√	√
O43292	GPAA1	√	√
O43293	DAPK3	√	√
O43295	SRGAP3	√
O43298	ZBTB43	√	√
O43299	AP5Z1	√	√
O43301	HSPA12A	√	√
O43303	CCP110	√	√
O43310	CTIF	√	√
O43314	PPIP5K2	√	√
O43318	MAP3K7	√	√
O43324	EEF1E1	√	√
O43325	LYRM1	√
O43347	MSI1	√	√
O43353	RIPK2	√	√
O43379	WDR62	√	√
O43390	HNRNPR	√	√
O43395	PRPF3	√	√
O43396	TXNL1	√	√
O43399	TPD52L2	√	√
O43402	EMC8	√	√
O43414	ERI3	√	√
O43422	THAP12	√	√
O43426	SYNJ1	√	√
O43427	FIBP	√	√
O43432	EIF4G3	√	√
O43439	CBFA2T2	√	√
O43447	PPIH	√	√
O43463	SUV39H1	√	√
O43464	HTRA2	√	√
O43482	OIP5	√	√
O43488	AKR7A2	√	√
O43491	EPB41L2	√	√
O43493	TGOLN2	√	√
O43502	RAD51C	√	√
O43504	LAMTOR5	√	√
O43505	B4GAT1	√	√
O43513	MED7	√	√
O43516	WIPF1	√	√
O43521	BCL2L11	√
O43524	FOXO3	√	√
O43542	XRCC3	√	√
O43567	RNF13	√	√
O43570	CA12	√
O43572	AKAP10	√	√
O43583	DENR	√	√
O43592	XPOT	√	√
O43598	DNPH1	√	√
O43614	HCRTR2	√	√
O43615	TIMM44	√	√
O43617	TRAPPC3	√	√
O43633	CHMP2A	√	√
O43639	NCK2	√	√
O43657	TSPAN6	√	√
O43660	PLRG1	√	√
O43663	PRC1	√	√
O43665	RGS10	√	√
O43670	ZNF207	√	√
O43674	NDUFB5	√	√
O43676	NDUFB3	√	√
O43677	NDUFC1	√	√
O43678	NDUFA2	√	√
O43681	GET3	√	√
O43683	BUB1	√	√
O43684	BUB3	√	√
O43707	ACTN4	√	√
O43708	GSTZ1	√	√
O43709	BUD23	√	√
O43715	TRIAP1	√	√
O43716	GATC	√	√
O43719	HTATSF1	√	√
O43736	ITM2A	√	√
O43739	CYTH3	√
O43741	PRKAB2	√	√
O43747	AP1G1	√	√
O43752	STX6	√	√
O43759	SYNGR1	√	√
O43760	SYNGR2	√	√
O43761	SYNGR3	√	√
O43765	SGTA	√	√
O43766	LIAS	√	√
O43768	ENSA	√	√
O43772	SLC25A20	√	√
O43776	NARS1	√	√
O43791	SPOP	√
O43795	MYO1B	√	√
O43805	SSNA1	√	√
O43808	SLC25A17	√	√
O43809	NUDT21	√	√
O43813	LANCL1	√	√
O43815	STRN	√	√
O43818	RRP9	√	√
O43819	SCO2	√	√
O43822	CFAP410	√	√
O43823	AKAP8	√	√
O43824	GTPBP6	√	√
O43826	SLC37A4	√	√
O43837	IDH3B	√	√
O43847	NRDC	√	√
O43852	CALU	√	√
O43861	ATP9B	√	√
O43865	AHCYL1	√	√
O43896	KIF1C	√	√
O43909	EXTL3	√
O43913	ORC5	√	√
O43920	NDUFS5	√	√
O43924	PDE6D	√	√
O43929	ORC4	√	√
O43933	PEX1	√	√
O60216	RAD21	√	√
O60220	TIMM8A	√	√
O60231	DHX16	√	√
O60232	ZNRD2	√	√
O60234	GMFG	√	√
O60239	SH3BP5	√	√
O60244	MED14	√	√
O60245	PCDH7	√	√
O60256	PRPSAP2	√	√
O60262	GNG7	√	√
O60264	SMARCA5	√	√
O60271	SPAG9	√	√
O60279	SUSD5	√
O60281	ZNF292	√	√
O60282	KIF5C	√	√
O60287	URB1	√	√
O60291	MGRN1	√	√
O60292	SIPA1L3	√	√
O60293	ZFC3H1	√	√
O60294	LCMT2	√	√
O60306	AQR	√	√
O60313	OPA1	√	√
O60315	ZEB2	√	√
O60318	MCM3AP	√	√
O60331	PIP5K1C	√
O60333	KIF1B	√	√
O60337	MARCHF6	√	√
O60341	KDM1A	√	√
O60343	TBC1D4	√	√
O60346	PHLPP1	√	√
O60347	TBC1D12	√	√
O60353	FZD6	√
O60361	NME2P1	√	√
O60427	FADS1	√	√
O60443	GSDME	√	√
O60447	EVI5	√	√
O60462	NRP2	√	√
O60476	MAN1A2	√	√
O60488	ACSL4	√	√
O60493	SNX3	√	√
O60499	STX10	√	√
O60502	OGA	√	√
O60503	ADCY9	√	√
O60504	SORBS3	√	√
O60506	SYNCRIP	√	√
O60507	TPST1	√	√
O60508	CDC40	√	√
O60512	B4GALT3	√	√
O60518	RANBP6	√	√
O60524	NEMF	√	√
O60547	GMDS	√	√
O60548	FOXD2	√	√
O60551	NMT2	√	√
O60563	CCNT1	√	√
O60566	BUB1B	√	√
O60568	PLOD3	√	√
O60573	EIF4E2	√	√
O60583	CCNT2	√
O60610	DIAPH1	√	√
O60613	SELENOF	√	√
O60637	TSPAN3	√	√
O60645	EXOC3	√	√
O60658	PDE8A	√	√
O60662	KLHL41	√
O60664	PLIN3	√	√
O60671	RAD1	√	√
O60673	REV3L	√	√
O60678	PRMT3	√	√
O60683	PEX10	√	√
O60684	KPNA6	√	√
O60701	UGDH	√	√
O60704	TPST2	√	√
O60716	CTNND1	√	√
O60725	ICMT	√	√
O60739	EIF1B	√	√
O60749	SNX2	√	√
O60762	DPM1	√	√
O60763	USO1	√	√
O60765	ZNF354A	√	√
O60779	SLC19A2	√	√
O60783	MRPS14	√	√
O60784	TOM1	√	√
O60814	H2BC12	√	√
O60825	PFKFB2	√	√
O60826	CCDC22	√	√
O60828	PQBP1	√	√
O60830	TIMM17B	√	√
O60831	PRAF2	√	√
O60832	DKC1	√	√
O60841	EIF5B	√	√
O60869	EDF1	√	√
O60870	KIN	√	√
O60879	DIAPH2	√	√
O60884	DNAJA2	√	√
O60885	BRD4	√	√
O60888	CUTA	√	√
O60906	SMPD2	√	√
O60907	TBL1X	√	√
O60911	CTSV	√	√
O60921	HUS1	√	√
O60925	PFDN1	√	√
O60927	PPP1R11	√	√
O60930	RNASEH1	√	√
O60934	NBN	√	√
O60936	NOL3	√
O60941	DTNB	√	√
O60942	RNGTT	√	√
O75027	ABCB7	√	√
O75030	MITF	√
O75037	KIF21B	√
O75044	SRGAP2	√	√
O75051	PLXNA2	√
O75052	NOS1AP	√	√
O75054	IGSF3	√	√
O75056	SDC3	√	√
O75061	DNAJC6	√	√
O75063	FAM20B	√	√
O75078	ADAM11	√	√
O75083	WDR1	√	√
O75084	FZD7	√	√
O75110	ATP9A	√	√
O75113	N4BP1	√	√
O75116	ROCK2	√	√
O75122	CLASP2	√	√
O75127	PTCD1	√	√
O75128	COBL	√	√
O75131	CPNE3	√	√
O75132	ZBED4	√
O75140	DEPDC5	√	√
O75143	ATG13	√	√
O75145	PPFIA3	√	√
O75146	HIP1R	√	√
O75147	OBSL1	√	√
O75150	RNF40	√	√
O75152	ZC3H11A	√	√
O75153	CLUH	√	√
O75155	CAND2	√	√
O75157	TSC22D2	√	√
O75161	NPHP4	√
O75164	KDM4A	√	√
O75165	DNAJC13	√	√
O75167	PHACTR2	√	√
O75170	PPP6R2	√	√
O75175	CNOT3	√	√
O75177	SS18L1	√	√
O75179	ANKRD17	√	√
O75182	SIN3B	√	√
O75190	DNAJB6	√	√
O75191	XYLB	√	√
O75204	TMEM127	√	√
O75208	COQ9	√	√
O75223	GGCT	√	√
O75251	NDUFS7	√	√
O75298	RTN2	√	√
O75306	NDUFS2	√	√
O75312	ZPR1	√	√
O75319	DUSP11	√	√
O75323	NIPSNAP2	√	√
O75330	HMMR	√	√
O75340	PDCD6	√	√
O75347	TBCA	√	√
O75348	ATP6V1G1	√	√
O75351	VPS4B	√	√
O75352	MPDU1	√	√
O75354	ENTPD6	√	√
O75356	ENTPD5	√	√
O75362	ZNF217	√	√
O75367	MACROH2A1	√	√
O75368	SH3BGRL	√	√
O75369	FLNB	√	√
O75376	NCOR1	√	√
O75379	VAMP4	√	√
O75380	NDUFS6	√	√
O75381	PEX14	√	√
O75382	TRIM3	√	√
O75385	ULK1	√	√
O75386	TULP3	√
O75390	CS	√	√
O75391	SPAG7	√	√
O75394	MRPL33	√	√
O75396	SEC22B	√	√
O75398	DEAF1	√	√
O75400	PRPF40A	√	√
O75410	TACC1	√	√
O75414	NME6	√	√
O75419	CDC45	√	√
O75420	GIGYF1	√	√
O75427	LRCH4	√	√
O75431	MTX2	√	√
O75436	VPS26A	√	√
O75438	NDUFB1	√	√
O75439	PMPCB	√	√
O75444	MAF	√
O75446	SAP30	√	√
O75448	MED24	√	√
O75449	KATNA1	√	√
O75460	ERN1	√	√
O75461	E2F6	√	√
O75474	FRAT2	√
O75475	PSIP1	√	√
O75477	ERLIN1	√	√
O75478	TADA2A	√	√
O75486	SUPT3H	√	√
O75487	GPC4	√	√
O75489	NDUFS3	√	√
O75494	SRSF10	√	√
O75496	GMNN	√	√
O75503	CLN5	√	√
O75506	HSBP1	√	√
O75521	ECI2	√	√
O75525	KHDRBS3	√	√
O75528	TADA3	√	√
O75529	TAF5L	√	√
O75530	EED	√	√
O75531	BANF1	√	√
O75533	SF3B1	√	√
O75534	CSDE1	√	√
O75554	WBP4	√	√
O75569	PRKRA	√	√
O75570	MTRF1	√
O75575	CRCP	√	√
O75581	LRP6	√	√
O75582	RPS6KA5	√	√
O75586	MED6	√	√
O75592	MYCBP2	√	√
O75600	GCAT	√	√
O75607	NPM3	√	√
O75608	LYPLA1	√	√
O75616	ERAL1	√	√
O75643	SNRNP200	√	√
O75648	TRMU	√	√
O75663	TIPRL	√	√
O75665	OFD1	√	√
O75674	TOM1L1	√	√
O75676	RPS6KA4	√	√
O75683	SURF6	√	√
O75688	PPM1B	√	√
O75691	UTP20	√	√
O75694	NUP155	√	√
O75695	RP2	√	√
O75716	STK16	√
O75717	WDHD1	√	√
O75718	CRTAP	√	√
O75746	SLC25A12	√	√
O75771	RAD51D	√	√
O75781	PALM	√	√
O75787	ATP6AP2	√	√
O75792	RNASEH2A	√	√
O75794	CDC123	√	√
O75808	CAPN15	√	√
O75815	BCAR3	√
O75817	POP7	√	√
O75818	RPP40	√	√
O75821	EIF3G	√	√
O75822	EIF3J	√	√
O75828	CBR3	√	√
O75832	PSMD10	√	√
O75843	AP1G2	√	√
O75844	ZMPSTE24	√	√
O75874	IDH1	√	√
O75879	GATB	√	√
O75880	SCO1	√	√
O75882	ATRN	√	√
O75884	RBBP9	√	√
O75886	STAM2	√	√
O75907	DGAT1	√	√
O75909	CCNK	√	√
O75911	DHRS3	√	√
O75915	ARL6IP5	√	√
O75925	PIAS1	√	√
O75928	PIAS2	√	√
O75934	BCAS2	√	√
O75935	DCTN3	√	√
O75937	DNAJC8	√	√
O75940	SMNDC1	√	√
O75943	RAD17	√	√
O75947	ATP5PD	√	√
O75955	FLOT1	√	√
O75962	TRIO	√	√
O75964	ATP5MG	√	√
O75969	AKAP3	√	√
O75970	MPDZ	√	√
O75976	CPD	√	√
O76003	GLRX3	√	√
O76011	KRT34	√
O76021	RSL1D1	√	√
O76024	WFS1	√	√
O76031	CLPX	√	√
O76041	NEBL	√	√
O76054	SEC14L2	√	√
O76061	STC2	√	√
O76064	RNF8	√	√
O76070	SNCG	√	√
O76071	CIAO1	√	√
O76074	PDE5A	√	√
O76075	DFFB	√	√
O76080	ZFAND5	√	√
O76083	PDE9A	√	√
O76094	SRP72	√	√
O76095	JTB	√
O94760	DDAH1	√	√
O94761	RECQL4	√	√
O94762	RECQL5	√	√
O94763	URI1	√	√
O94766	B3GAT3	√	√
O94768	STK17B	√	√
O94776	MTA2	√	√
O94782	USP1	√	√
O94788	ALDH1A2	√	√
O94804	STK10	√	√
O94806	PRKD3	√	√
O94808	GFPT2	√	√
O94813	SLIT2	√	√
O94818	NOL4	√
O94819	KBTBD11	√	√
O94822	LTN1	√
O94826	TOMM70	√	√
O94829	IPO13	√	√
O94830	DDHD2	√	√
O94832	MYO1D	√	√
O94842	TOX4	√	√
O94851	MICAL2	√	√
O94854	MACF1	√	√
O94855	SEC24D	√	√
O94864	SUPT7L	√	√
O94868	FCHSD2	√	√
O94874	UFL1	√	√
O94880	PHF14	√	√
O94885	SASH1	√	√
O94886	TMEM63A	√	√
O94887	FARP2	√	√
O94888	UBXN7	√	√
O94889	KLHL18	√	√
O94898	LRIG2	√	√
O94901	SUN1	√	√
O94903	PLPBP	√	√
O94905	ERLIN2	√	√
O94906	PRPF6	√	√
O94910	ADGRL1	√
O94913	PCF11	√	√
O94915	FRYL	√
O94916	NFAT5	√	√
O94919	ENDOD1	√	√
O94923	GLCE	√	√
O94925	GLS	√	√
O94927	HAUS5	√	√
O94952	FBXO21	√	√
O94953	KDM4B	√	√
O94955	RHOBTB3	√	√
O94964	MTCL2	√	√
O94966	USP19	√	√
O94967	WDR47	√	√
O94972	TRIM37	√
O94973	AP2A2	√	√
O94979	SEC31A	√	√
O94985	CLSTN1	√	√
O94986	CEP152	√
O94991	SLITRK5	√	√
O94992	HEXIM1	√	√
O95049	TJP3	√
O95057	DIRAS1	√	√
O95067	CCNB2	√	√
O95070	YIF1A	√	√
O95071	UBR5	√	√
O95081	AGFG2	√
O95104	SCAF4	√	√
O95139	NDUFB6	√	√
O95140	MFN2	√	√
O95149	SNUPN	√	√
O95155	UBE4B	√	√
O95158	NXPH4	√
O95159	ZFPL1	√	√
O95163	ELP1	√	√
O95164	UBL3	√	√
O95166	GABARAP	√
O95167	NDUFA3	√	√
O95168	NDUFB4	√	√
O95169	NDUFB8	√	√
O95182	NDUFA7	√	√
O95185	UNC5C	√	√
O95197	RTN3	√	√
O95202	LETM1	√	√
O95208	EPN2	√	√
O95210	STBD1	√	√
O95214	LEPROTL1	√	√
O95218	ZRANB2	√	√
O95219	SNX4	√	√
O95229	ZWINT	√	√
O95232	LUC7L3	√	√
O95235	KIF20A	√	√
O95239	KIF4A	√	√
O95243	MBD4	√	√
O95248	SBF1	√	√
O95249	GOSR1	√	√
O95251	KAT7	√	√
O95258	SLC25A14	√	√
O95260	ATE1	√	√
O95273	CCNDBP1	√	√
O95292	VAPB	√	√
O95295	SNAPIN	√	√
O95297	MPZL1	√	√
O95298	NDUFC2	√	√
O95299	NDUFA10	√	√
O95302	FKBP9	√	√
O95319	CELF2	√	√
O95336	PGLS	√	√
O95340	PAPSS2	√	√
O95347	SMC2	√	√
O95352	ATG7	√	√
O95359	TACC2	√	√
O95363	FARS2	√	√
O95365	ZBTB7A	√	√
O95372	LYPLA2	√	√
O95373	IPO7	√	√
O95376	ARIH2	√	√
O95379	TNFAIP8	√	√
O95382	MAP3K6	√	√
O95391	SLU7	√	√
O95394	PGM3	√	√
O95396	MOCS3	√	√
O95400	CD2BP2	√	√
O95402	MED26	√	√
O95405	ZFYVE9	√	√
O95406	CNIH1	√
O95409	ZIC2	√	√
O95425	SVIL	√	√
O95429	BAG4	√	√
O95433	AHSA1	√	√
O95453	PARN	√	√
O95455	TGDS	√	√
O95456	PSMG1	√	√
O95461	LARGE1	√
O95470	SGPL1	√	√
O95476	CTDNEP1	√	√
O95478	NSA2	√	√
O95479	H6PD	√	√
O95486	SEC24A	√	√
O95487	SEC24B	√	√
O95490	ADGRL2	√	√
O95503	CBX6	√	√
O95544	NADK	√	√
O95551	TDP2	√	√
O95562	SFT2D2	√	√
O95563	MPC2	√	√
O95568	METTL18	√
O95571	ETHE1	√	√
O95573	ACSL3	√	√
O95602	POLR1A	√	√
O95613	PCNT	√	√
O95619	YEATS4	√	√
O95620	DUS4L	√
O95625	ZBTB11	√	√
O95628	CNOT4	√	√
O95630	STAMBP	√	√
O95639	CPSF4	√	√
O95644	NFATC1	√	√
O95671	ASMTL	√	√
O95674	CDS2	√	√
O95677	EYA4	√	√
O95684	CEP43	√	√
O95685	PPP1R3D	√	√
O95696	BRD1	√	√
O95707	POP4	√	√
O95714	HERC2	√	√
O95716	RAB3D	√	√
O95721	SNAP29	√	√
O95747	OXSR1	√	√
O95749	GGPS1	√	√
O95755	RAB36	√
O95757	HSPA4L	√	√
O95758	PTBP3	√	√
O95772	STARD3NL	√	√
O95777	LSM8	√	√
O95782	AP2A1	√	√
O95785	WIZ	√	√
O95793	STAU1	√	√
O95801	TTC4	√	√
O95807	TMEM50A	√	√
O95816	BAG2	√	√
O95817	BAG3	√	√
O95819	MAP4K4	√	√
O95822	MLYCD	√	√
O95825	CRYZL1	√	√
O95831	AIFM1	√	√
O95834	EML2	√	√
O95835	LATS1	√	√
O95837	GNA14	√	√
O95857	TSPAN13	√	√
O95858	TSPAN15	√	√
O95861	BPNT1	√	√
O95864	FADS2	√
O95865	DDAH2	√	√
O95870	ABHD16A	√	√
O95872	GPANK1	√
O95873	C6orf47	√	√
O95881	TXNDC12	√	√
O95900	TRUB2	√	√
O95905	ECD	√	√
O95926	SYF2	√	√
O95948	ONECUT2	√
O95983	MBD3	√	√
O95985	TOP3B	√	√
O95989	NUDT3	√	√
O95997	PTTG1	√	√
O95999	BCL10	√	√
O96000	NDUFB10	√	√
O96005	CLPTM1	√	√
O96006	ZBED1	√	√
O96007	MOCS2	√	√
O96008	TOMM40	√	√
O96011	PEX11B	√	√
O96013	PAK4	√	√
O96017	CHEK2	√	√
O96018	APBA3	√	√
O96019	ACTL6A	√	√
O96028	NSD2	√	√
O96033	MOCS2	√	√
P00156	MT-CYB	√	√
P00167	CYB5A	√	√
P00338	LDHA	√	√
P00367	GLUD1	√	√
P00374	DHFR	√	√
P00387	CYB5R3	√	√
P00390	GSR	√	√
P00403	MT-CO2	√	√
P00414	MT-CO3	√	√
P00441	SOD1	√	√
P00491	PNP	√	√
P00492	HPRT1	√	√
P00505	GOT2	√	√
P00519	ABL1	√	√
P00533	EGFR	√	√
P00558	PGK1	√	√
P00568	AK1	√	√
P00813	ADA	√	√
P00846	MT-ATP6	√	√
P00918	CA2	√	√
P00966	ASS1	√	√
P01034	CST3	√	√
P01106	MYC	√	√
P01111	NRAS	√	√
P01112	HRAS	√	√
P01116	KRAS	√
P01130	LDLR	√	√
P01135	TGFA	√
P01137	TGFB1	√	√
P01138	NGF	√
P01889	HLA-B	√	√
P02042	HBD	√	√
P02452	COL1A1	√
P02533	KRT14	√	√
P02545	LMNA	√	√
P02647	APOA1	√	√
P02649	APOE	√	√
P02654	APOC1	√
P02765	AHSG	√	√
P02768	ALB	√	√
P02786	TFRC	√	√
P02792	FTL	√
P02794	FTH1	√	√
P03886	MT-ND1	√	√
P03897	MT-ND3	√	√
P03905	MT-ND4	√	√
P03915	MT-ND5	√	√
P03923	MT-ND6	√	√
P03928	MT-ATP8	√	√
P04035	HMGCR	√
P04040	CAT	√	√
P04049	RAF1	√	√
P04062	GBA1	√	√
P04066	FUCA1	√	√
P04075	ALDOA	√	√
P04080	CSTB	√	√
P04083	ANXA1	√	√
P04114	APOB	√	√
P04150	NR3C1	√	√
P04156	PRNP	√	√
P04179	SOD2	√	√
P04181	OAT	√	√
P04183	TK1	√	√
P04259	KRT6B	√	√
P04264	KRT1	√	√
P04350	TUBB4A	√	√
P04406	GAPDH	√	√
P04424	ASL	√	√
P04439	HLA-A	√	√
P04626	ERBB2	√	√
P04632	CAPNS1	√	√
P04637	TP53	√	√
P04792	HSPB1	√	√
P04818	TYMS	√	√
P04843	RPN1	√	√
P04844	RPN2	√	√
P04899	GNAI2	√	√
P04920	SLC4A2	√	√
P04921	GYPC	√
P05023	ATP1A1	√	√
P05026	ATP1B1	√	√
P05067	APP	√	√
P05091	ALDH2	√	√
P05107	ITGB2	√
P05114	HMGN1	√	√
P05141	SLC25A5	√	√
P05161	ISG15	√
P05165	PCCA	√	√
P05166	PCCB	√	√
P05186	ALPL	√	√
P05198	EIF2S1	√	√
P05204	HMGN2	√	√
P05386	RPLP1	√	√
P05387	RPLP2	√	√
P05388	RPLP0	√	√
P05412	JUN	√	√
P05423	POLR3D	√	√
P05455	SSB	√	√
P05549	TFAP2A	√	√
P05556	ITGB1	√	√
P05771	PRKCB	√	√
P05783	KRT18	√	√
P05787	KRT8	√	√
P06132	UROD	√	√
P06213	INSR	√	√
P06241	FYN	√	√
P06276	BCHE	√
P06280	GLA	√	√
P06396	GSN	√	√
P06400	RB1	√	√
P06454	PTMA	√	√
P06493	CDK1	√	√
P06576	ATP5F1B	√	√
P06730	EIF4E	√	√
P06733	ENO1	√	√
P06737	PYGL	√	√
P06744	GPI	√	√
P06746	POLB	√	√
P06748	NPM1	√	√
P06753	TPM3	√	√
P06756	ITGAV	√	√
P06865	HEXA	√	√
P07099	EPHX1	√	√
P07108	DBI	√	√
P07195	LDHB	√	√
P07196	NEFL	√	√
P07197	NEFM	√	√
P07199	CENPB	√	√
P07203	GPX1	√	√
P07205	PGK2	√	√
P07237	P4HB	√	√
P07305	H1-0	√	√
P07311	ACYP1	√	√
P07339	CTSD	√	√
P07355	ANXA2	√	√
P07384	CAPN1	√	√
P07437	TUBB	√	√
P07477	PRSS1	√	√
P07602	PSAP	√	√
P07686	HEXB	√	√
P07711	CTSL	√	√
P07737	PFN1	√	√
P07738	BPGM	√	√
P07741	APRT	√	√
P07814	EPRS1	√	√
P07858	CTSB	√	√
P07864	LDHC	√	√
P07900	HSP90AA1	√	√
P07902	GALT	√	√
P07910	HNRNPC	√	√
P07919	UQCRH	√	√
P07942	LAMB1	√	√
P07947	YES1	√	√
P07948	LYN	√	√
P07951	TPM2	√	√
P07954	FH	√	√
P07992	ERCC1	√	√
P08047	SP1	√	√
P08048	ZFY	√	√
P08069	IGF1R	√	√
P08133	ANXA6	√	√
P08134	RHOC	√	√
P08174	CD55	√	√
P08183	ABCB1	√	√
P08195	SLC3A2	√	√
P08236	GUSB	√	√
P08237	PFKM	√	√
P08238	HSP90AB1	√	√
P08240	SRPRA	√	√
P08243	ASNS	√	√
P08247	SYP	√	√
P08397	HMBS	√	√
P08514	ITGA2B	√
P08559	PDHA1	√	√
P08572	COL4A2	√	√
P08574	CYC1	√	√
P08579	SNRPB2	√	√
P08581	MET	√	√
P08582	MELTF	√	√
P08621	SNRNP70	√	√
P08648	ITGA5	√	√
P08651	NFIC	√	√
P08670	VIM	√	√
P08708	RPS17	√	√
P08754	GNAI3	√	√
P08758	ANXA5	√	√
P08865	RPSA	√	√
P08962	CD63	√	√
P09001	MRPL3	√	√
P09012	SNRPA	√	√
P09104	ENO2	√	√
P09105	HBQ1	√	√
P09110	ACAA1	√	√
P09132	SRP19	√	√
P09211	GSTP1	√	√
P09234	SNRPC	√	√
P09382	LGALS1	√	√
P09417	QDPR	√	√
P09429	HMGB1	√	√
P09455	RBP1	√	√
P09471	GNAO1	√	√
P09486	SPARC	√	√
P09493	TPM1	√	√
P09496	CLTA	√	√
P09497	CLTB	√	√
P09525	ANXA4	√	√
P09543	CNP	√	√
P09601	HMOX1	√	√
P09622	DLD	√	√
P09651	HNRNPA1	√	√
P09661	SNRPA1	√	√
P09668	CTSH	√	√
P09669	COX6C	√	√
P09874	PARP1	√	√
P09884	POLA1	√	√
P09936	UCHL1	√	√
P09960	LTA4H	√	√
P09972	ALDOC	√	√
P0C024	NUDT7	√
P0C0S5	H2AZ1	√	√
P0C1Z6	TFPT	√	√
P0C5J1	FAM86B2	√	√
P0C7P0	CISD3	√	√
P0C7T5	ATXN1L	√	√
P0C860	MSL3B	√
P0C869	PLA2G4B	√	√
P0C870	JMJD7	√	√
P0CAP2	POLR2M	√	√
P0CG12	DERPC	√	√
P0CG13	CHTF8	√	√
P0CG34	TMSB15A	√
P0CG38	POTEI	√	√
P0CG39	POTEJ	√
P0CG40	SP9	√
P0CJ78	ZNF865	√	√
P0CW24	PNMA6A	√	√
P0DI81	TRAPPC2	√	√
P0DI83	RAB34	√	√
P0DJ07	PET100	√	√
P0DJ93	SMIM13	√	√
P0DJD0	RGPD1	√	√
P0DMM9	SULT1A3	√	√
P0DMQ5	INAFM2	√	√
P0DMU7	CT45A6	√
P0DMV8	HSPA1A	√	√
P0DP23	CALM1	√	√
P0DPB6	POLR1D	√	√
P0DPD8	EEF1AKMT4-ECE2	√
P0DPI2	GATD3	√	√
P10070	GLI2	√
P10109	FDX1	√	√
P10114	RAP2A	√	√
P10155	RO60	√	√
P10176	COX8A	√	√
P10244	MYBL2	√	√
P10253	GAA	√	√
P10265	ERVK-10	√
P10276	RARA	√	√
P10301	RRAS	√	√
P10321	HLA-C	√	√
P10398	ARAF	√	√
P10412	H1-4	√	√
P10515	DLAT	√	√
P10586	PTPRF	√	√
P10588	NR2F6	√	√
P10589	NR2F1	√	√
P10599	TXN	√	√
P10606	COX5B	√	√
P10619	CTSA	√	√
P10620	MGST1	√	√
P10636	MAPT	√	√
P10644	PRKAR1A	√	√
P10721	KIT	√
P10746	Mgu	√	√
P10768	ESD	√	√
P10809	HSPD1	√	√
P10909	CLU	√	√
P11021	HSPA5	√	√
P11047	LAMC1	√	√
P11055	MYH3	√
P11117	ACP2	√	√
P11142	HSPA8	√	√
P11166	SLC2A1	√
P11171	EPB41	√	√
P11172	UMPS	√	√
P11177	PDHB	√	√
P11182	DBT	√	√
P11216	PYGB	√	√
P11233	RALA	√	√
P11234	RALB	√	√
P11274	BCR	√	√
P11277	SPTB	√
P11279	LAMP1	√	√
P11310	ACADM	√	√
P11362	FGFR1	√	√
P11387	TOP1	√	√
P11388	TOP2A	√	√
P11413	G6PD	√	√
P11441	UBL4A	√	√
P11474	ESRRA	√	√
P11498	PC	√	√
P11532	DMD	√	√
P11586	MTHFD1	√	√
P11717	IGF2R	√	√
P11766	ADH5	√	√
P11802	CDK4	√	√
P11831	SRF	√	√
P11908	PRPS2	√	√
P11940	PABPC1	√	√
P12004	PCNA	√	√
P12081	HARS1	√	√
P12109	COL6A1	√	√
P12235	SLC25A4	√	√
P12236	SLC25A6	√	√
P12268	IMPDH2	√	√
P12270	TPR	√	√
P12277	CKB	√	√
P12429	ANXA3	√	√
P12532	CKMT1A	√	√
P12694	BCKDHA	√	√
P12755	SKI	√	√
P12757	SKIL	√
P12814	ACTN1	√	√
P12830	CDH1	√	√
P12931	SRC	√	√
P12955	PEPD	√	√
P12956	XRCC6	√	√
P13010	XRCC5	√	√
P13051	UNG	√	√
P13056	NR2C1	√	√
P13073	COX4I1	√	√
P13164	IFITM1	√	√
P13196	ALAS1	√	√
P13224	GP1BB	√	√
P13284	IFI30	√	√
P13473	LAMP2	√	√
P13489	RNH1	√	√
P13498	CYBA	√	√
P13591	NCAM1	√	√
P13612	ITGA4	√	√
P13637	ATP1A3	√	√
P13639	EEF2	√	√
P13645	KRT10	√	√
P13667	PDIA4	√	√
P13674	P4HA1	√	√
P13693	TPT1	√	√
P13716	ALAD	√	√
P13747	HLA-E	√	√
P13796	LCP1	√	√
P13797	PLS3	√	√
P13798	APEH	√	√
P13804	ETFA	√	√
P13807	GYS1	√	√
P13861	PRKAR2A	√	√
P13984	GTF2F2	√	√
P13987	CD59	√	√
P13995	MTHFD2	√	√
P14174	MIF	√	√
P14209	CD99	√	√
P14314	PRKCSH	√	√
P14324	FDPS	√	√
P14373	TRIM27	√	√
P14384	CPM	√
P14406	COX7A2	√	√
P14543	NID1	√	√
P14550	AKR1A1	√	√
P14618	PKM	√	√
P14625	HSP90B1	√	√
P14635	CCNB1	√	√
P14649	MYL6B	√	√
P14678	SNRPB	√	√
P14735	IDE	√	√
P14854	COX6B1	√	√
P14859	POU2F1	√	√
P14866	HNRNPL	√	√
P14868	DARS1	√	√
P14923	JUP	√	√
P14927	UQCRB	√	√
P15056	BRAF	√	√
P15104	GLUL	√	√
P15121	AKR1B1	√	√
P15151	PVR	√	√
P15153	RAC2	√
P15170	GSPT1	√	√
P15260	IFNGR1	√	√
P15289	ARSA	√	√
P15291	B4GALT1	√	√
P15311	EZR	√	√
P15336	ATF2	√	√
P15374	UCHL3	√	√
P15529	CD46	√	√
P15531	NME1	√	√
P15559	NQO1	√	√
P15586	GNS	√	√
P15735	PHKG2	√	√
P15880	RPS2	√	√
P15882	CHN1	√
P15923	TCF3	√	√
P15924	DSP	√	√
P15927	RPA2	√	√
P15954	COX7C	√	√
P16083	NQO2	√	√
P16152	CBR1	√	√
P16157	ANK1	√	√
P16219	ACADS	√	√
P16220	CREB1	√	√
P16260	SLC25A16	√	√
P16278	GLB1	√	√
P16298	PPP3CB	√	√
P16333	NCK1	√	√
P16383	GCFC2	√	√
P16402	H1-3	√	√
P16403	H1-2	√	√
P16435	POR	√	√
P16591	FER	√	√
P16615	ATP2A2	√	√
P16870	CPE	√	√
P16885	PLCG2	√	√
P16930	FAH	√	√
P16949	STMN1	√	√
P16989	YBX3	√	√
P17028	ZNF24	√	√
P17029	ZKSCAN1	√	√
P17039	ZNF30	√
P17050	NAGA	√	√
P17066	HSPA6	√	√
P17096	HMGA1	√	√
P17098	ZNF8	√	√
P17152	TMEM11	√	√
P17174	GOT1	√	√
P17252	PRKCA	√	√
P17275	JUNB	√	√
P17301	ITGA2	√	√
P17302	GJA1	√	√
P17480	UBTF	√	√
P17482	HOXB9	√	√
P17509	HOXB6	√	√
P17516	AKR1C4	√
P17535	JUND	√	√
P17544	ATF7	√	√
P17568	NDUFB7	√	√
P17612	PRKACA	√	√
P17655	CAPN2	√	√
P17676	CEBPB	√	√
P17677	GAP43	√	√
P17706	PTPN2	√	√
P17707	AMD1	√	√
P17812	CTPS1	√	√
P17844	DDX5	√	√
P17858	PFKL	√	√
P17900	GM2A	√	√
P17931	LGALS3	√	√
P17980	PSMC3	√	√
P17987	TCP1	√	√
P18031	PTPN1	√	√
P18065	IGFBP2	√	√
P18074	ERCC2	√	√
P18077	RPL35A	√	√
P18085	ARF4	√	√
P18124	RPL7	√	√
P18206	VCL	√	√
P18433	PTPRA	√	√
P18440	NAT1	√	√
P18510	IL1RN	√	√
P18583	SON	√	√
P18615	NELFE	√	√
P18621	RPL17	√	√
P18669	PGAM1	√	√
P18754	RCC1	√	√
P18827	SDC1	√	√
P18846	ATF1	√	√
P18847	ATF3	√
P18848	ATF4	√	√
P18850	ATF6	√	√
P18858	LIG1	√	√
P18859	ATP5PF	√	√
P18887	XRCC1	√	√
P19022	CDH2	√	√
P19086	GNAZ	√	√
P19174	PLCG1	√	√
P19256	CD58	√
P19320	VCAM1	√
P19338	NCL	√	√
P19367	HK1	√	√
P19387	POLR2C	√	√
P19388	POLR2E	√	√
P19404	NDUFV2	√	√
P19419	ELK1	√	√
P19447	ERCC3	√	√
P19474	TRIM21	√	√
P19484	TFEB	√	√
P19525	EIF2AK2	√	√
P19532	TFE3	√	√
P19544	WT1	√	√
P19622	EN2	√
P19623	SRM	√	√
P19634	SLC9A1	√	√
P19784	CSNK2A2	√	√
P19793	RXRA	√	√
P19838	NFKB1	√	√
P20020	ATP2B1	√	√
P20042	EIF2S2	√	√
P20073	ANXA7	√	√
P20226	TBP	√	√
P20248	CCNA2	√	√
P20265	POU3F2	√	√
P20290	BTF3	√	√
P20336	RAB3A	√	√
P20337	RAB3B	√	√
P20338	RAB4A	√	√
P20339	RAB5A	√	√
P20340	RAB6A	√	√
P20585	MSH3	√	√
P20618	PSMB1	√	√
P20645	M6PR	√	√
P20648	ATP4A	√
P20671	H2AC7	√
P20674	COX5A	√	√
P20700	LMNB1	√	√
P20719	HOXA5	√	√
P20742	PZP	√	√
P20810	CAST	√	√
P20839	IMPDH1	√	√
P20929	NEB	√
P20936	RASA1	√	√
P20962	PTMS	√	√
P21127	CDK11B	√	√
P21266	GSTM3	√	√
P21281	ATP6V1B2	√	√
P21283	ATP6V1C1	√	√
P21333	FLNA	√	√
P21359	NF1	√	√
P21399	ACO1	√	√
P21580	TNFAIP3	√	√
P21675	TAF1	√
P21796	VDAC1	√	√
P21802	FGFR2	√	√
P21810	BGN	√
P21912	SDHB	√	√
P21926	CD9	√	√
P21953	BCKDHB	√	√
P21964	COMT	√	√
P21980	TGM2	√	√
P22033	MMUT	√	√
P22059	OSBP	√	√
P22061	PCMT1	√	√
P22083	FUT4	√
P22087	FBL	√	√
P22102	GART	√	√
P22223	CDH3	√	√
P22234	PAICS	√	√
P22307	SCP2	√	√
P22314	UBA1	√	√
P22392	NME2	√
P22413	ENPP1	√	√
P22415	USF1	√	√
P22455	FGFR4	√
P22466	GAL	√
P22492	H1-6	√	√
P22570	FDXR	√	√
P22607	FGFR3	√	√
P22626	HNRNPA2B1	√	√
P22670	RFX1	√	√
P22681	CBL	√	√
P22694	PRKACB	√	√
P22695	UQCRC2	√	√
P22830	FECH	√	√
P23025	XPA	√	√
P23142	FBLN1	√	√
P23193	TCEA1	√	√
P23229	ITGA6	√	√
P23246	SFPQ	√	√
P23258	TUBG1	√	√
P23284	PPIB	√	√
P23368	ME2	√	√
P23378	GLDC	√	√
P23381	WARS1	√	√
P23396	RPS3	√	√
P23434	GCSH	√	√
P23443	RPS6KB1	√	√
P23458	JAK1	√	√
P23468	PTPRD	√	√
P23470	PTPRG	√	√
P23508	MCC	√	√
P23511	NFYA	√	√
P23526	AHCY	√	√
P23527	H2BC17	√
P23528	CFL1	√	√
P23588	EIF4B	√	√
P23610	F8A1	√	√
P23634	ATP2B4	√	√
P23677	ITPKA	√	√
P23743	DGKA	√	√
P23760	PAX3	√	√
P23771	GATA3	√
P23786	CPT2	√	√
P23919	DTYMK	√	√
P23921	RRM1	√	√
P24311	COX7B	√	√
P24386	CHM	√	√
P24390	KDELR1	√	√
P24468	NR2F2	√	√
P24534	EEF1B2	√	√
P24539	ATP5PB	√	√
P24588	AKAP5	√
P24593	IGFBP5	√
P24666	ACP1	√	√
P24723	PRKCH	√	√
P24752	ACAT1	√	√
P24863	CCNC	√	√
P24864	CCNE1	√
P24928	POLR2A	√	√
P24941	CDK2	√	√
P25054	APC	√	√
P25098	GRK2	√	√
P25205	MCM3	√	√
P25208	NFYB	√	√
P25325	MPST	√	√
P25391	LAMA1	√
P25398	RPS12	√	√
P25440	BRD2	√	√
P25445	FAS	√	√
P25490	YY1	√	√
P25685	DNAJB1	√	√
P25686	DNAJB2	√	√
P25705	ATP5F1A	√	√
P25786	PSMA1	√	√
P25787	PSMA2	√	√
P25788	PSMA3	√	√
P25789	PSMA4	√	√
P25942	CD40	√	√
P25963	NFKBIA	√	√
P26038	MSN	√	√
P26045	PTPN3	√	√
P26196	DDX6	√	√
P26232	CTNNA2	√
P26358	DNMT1	√	√
P26367	PAX6	√	√
P26368	U2AF2	√	√
P26373	RPL13	√	√
P26374	CHML	√	√
P26440	IVD	√	√
P26572	MGAT1	√
P26583	HMGB2	√	√
P26599	PTBP1	√	√
P26639	TARS1	√	√
P26640	VARS1	√	√
P26641	EEF1G	√	√
P26885	FKBP2	√	√
P26992	CNTFR	√	√
P27037	ACVR2A	√	√
P27105	STOM	√	√
P27144	AK4	√	√
P27338	MAOB	√	√
P27348	YWHAQ	√	√
P27361	MAPK3	√	√
P27448	MARK3	√	√
P27449	ATP6V0C	√	√
P27540	ARNT	√	√
P27544	CERS1	√	√
P27635	RPL10	√	√
P27694	RPA1	√	√
P27695	APEX1	√	√
P27707	DCK	√	√
P27708	CAD	√	√
P27797	CALR	√	√
P27815	PDE4A	√
P27816	MAP4	√	√
P27824	CANX	√	√
P27986	PIK3R1	√	√
P28065	PSMB9	√	√
P28066	PSMA5	√	√
P28070	PSMB4	√	√
P28072	PSMB6	√	√
P28074	PSMB5	√	√
P28161	GSTM2	√	√
P28288	ABCD3	√	√
P28289	TMOD1	√	√
P28290	ITPRID2	√	√
P28324	ELK4	√	√
P28328	PEX2	√	√
P28330	ACADL	√	√
P28331	NDUFS1	√	√
P28340	POLD1	√	√
P28347	TEAD1	√	√
P28370	SMARCA1	√	√
P28482	MAPK1	√	√
P28676	GCA	√	√
P28702	RXRB	√	√
P28715	ERCC5	√	√
P28749	RBL1	√	√
P28799	GRN	√	√
P28838	LAP3	√	√
P29083	GTF2E1	√	√
P29084	GTF2E2	√	√
P29144	TPP2	√	√
P29218	IMPA1	√	√
P29317	EPHA2	√	√
P29320	EPHA3	√	√
P29323	EPHB2	√	√
P29350	PTPN6	√	√
P29353	SHC1	√	√
P29372	MPG	√	√
P29373	CRABP2	√	√
P29374	ARID4A	√	√
P29375	KDM5A	√	√
P29400	COL4A5	√
P29401	TKT	√	√
P29475	NOS1	√
P29558	RBMS1	√	√
P29590	PML	√	√
P29597	TYK2	√	√
P29692	EEF1D	√	√
P29728	OAS2	√
P29966	MARCKS	√	√
P29992	GNA11	√	√
P30038	ALDH4A1	√	√
P30039	PBLD	√
P30040	ERP29	√	√
P30041	PRDX6	√	√
P30043	BLVRB	√	√
P30044	PRDX5	√	√
P30046	DDT	√	√
P30047	GCHFR	√	√
P30048	PRDX3	√	√
P30049	ATP5F1D	√	√
P30050	RPL12	√	√
P30084	ECHS1	√	√
P30085	CMPK1	√	√
P30086	PEBP1	√	√
P30101	PDIA3	√	√
P30153	PPP2R1A	√	√
P30154	PPP2R1B	√	√
P30260	CDC27	√	√
P30291	WEE1	√
P30307	CDC25C	√	√
P30405	PPIF	√	√
P30414	NKTR	√	√
P30419	NMT1	√	√
P30519	HMOX2	√	√
P30520	ADSS2	√	√
P30533	LRPAP1	√	√
P30536	TSPO	√	√
P30566	ADSL	√	√
P30613	PKLR	√	√
P30622	CLIP1	√	√
P30626	SRI	√	√
P30740	SERPINB1	√	√
P30825	SLC7A1	√	√
P30837	ALDH1B1	√	√
P30876	POLR2B	√	√
P31040	SDHA	√	√
P31146	CORO1A	√	√
P31150	GDI1	√	√
P31153	MAT2A	√	√
P31260	HOXA10	√	√
P31270	HOXA11	√
P31271	HOXA13	√	√
P31274	HOXC9	√	√
P31276	HOXC13	√	√
P31277	HOXD11	√	√
P31321	PRKAR1B	√	√
P31323	PRKAR2B	√	√
P31327	CPS1	√	√
P31350	RRM2	√	√
P31431	SDC4	√
P31483	TIA1	√	√
P31512	FMO4	√
P31629	HIVEP2	√	√
P31641	SLC6A6	√	√
P31689	DNAJA1	√	√
P31749	AKT1	√	√
P31751	AKT2	√	√
P31930	UQCRC1	√	√
P31937	HIBADH	√	√
P31939	ATIC	√	√
P31942	HNRNPH3	√	√
P31943	HNRNPH1	√	√
P31946	YWHAB	√	√
P31947	SFN	√	√
P31948	STIP1	√	√
P31949	S100A11	√	√
P32019	INPP5B	√	√
P32119	PRDX2	√	√
P32121	ARRB2	√	√
P32189	GK	√	√
P32242	OTX1	√
P32321	DCTD	√	√
P32322	PYCR1	√	√
P32418	SLC8A1	√
P32519	ELF1	√	√
P32780	GTF2H1	√	√
P32856	STX2	√	√
P32929	CTH	√	√
P32969	RPL9	√	√
P33121	ACSL1	√	√
P33176	KIF5B	√	√
P33240	CSTF2	√	√
P33316	DUT	√	√
P33402	GUCY1A2	√
P33527	ABCC1	√	√
P33552	CKS2	√	√
P33897	ABCD1	√	√
P33908	MAN1A1	√	√
P33981	TTK	√	√
P33991	MCM4	√	√
P33992	MCM5	√	√
P33993	MCM7	√	√
P34059	GALNS	√	√
P34741	SDC2	√	√
P34896	SHMT1	√	√
P34897	SHMT2	√	√
P34913	EPHX2	√	√
P34931	HSPA1L	√	√
P34932	HSPA4	√	√
P34949	MPI	√	√
P35052	GPC1	√	√
P35080	PFN2	√	√
P35219	CA8	√	√
P35221	CTNNA1	√	√
P35222	CTNNB1	√	√
P35226	BMI1	√	√
P35232	PHB1	√	√
P35237	SERPINB6	√	√
P35240	NF2	√	√
P35241	RDX	√	√
P35244	RPA3	√	√
P35249	RFC4	√	√
P35250	RFC2	√	√
P35251	RFC1	√	√
P35268	RPL22	√	√
P35269	GTF2F1	√	√
P35270	SPR	√	√
P35453	HOXD13	√	√
P35520	CBS	√	√
P35527	KRT9	√	√
P35548	MSX2	√	√
P35556	FBN2	√	√
P35573	AGL	√	√
P35579	MYH9	√	√
P35580	MYH10	√	√
P35606	COPB2	√	√
P35610	SOAT1	√	√
P35611	ADD1	√	√
P35612	ADD2	√	√
P35613	BSG	√	√
P35625	TIMP3	√
P35637	FUS	√	√
P35658	NUP214	√	√
P35659	DEK	√	√
P35670	ATP7B	√	√
P35749	MYH11	√
P35754	GLRX	√	√
P35790	CHKA	√	√
P35813	PPM1A	√	√
P35869	AHR	√
P35908	KRT2	√	√
P35914	HMGCL	√	√
P35916	FLT4	√	√
P35998	PSMC2	√	√
P36021	SLC16A2	√	√
P36402	TCF7	√
P36404	ARL2	√	√
P36405	ARL3	√	√
P36507	MAP2K2	√	√
P36542	ATP5F1C	√	√
P36543	ATP6V1E1	√	√
P36551	CPOX	√	√
P36578	RPL4	√	√
P36639	NUDT1	√	√
P36776	LONP1	√	√
P36871	PGM1	√	√
P36873	PPP1CC	√	√
P36894	BMPR1A	√	√
P36897	TGFBR1	√	√
P36915	GNL1	√	√
P36954	POLR2I	√	√
P36955	SERPINF1	√	√
P36957	DLST	√	√
P36959	GMPR	√	√
P36969	GPX4	√	√
P37108	SRP14	√	√
P37173	TGFBR2	√
P37198	NUP62	√	√
P37235	HPCAL1	√	√
P37268	FDFT1	√	√
P37275	ZEB1	√	√
P37287	PIGA	√	√
P37802	TAGLN2	√	√
P37837	TALDO1	√	√
P37840	SNCA	√	√
P38117	ETFB	√	√
P38159	RBMX	√	√
P38398	BRCA1	√	√
P38432	COIL	√	√
P38435	GGCX	√	√
P38570	ITGAE	√	√
P38571	LIPA	√	√
P38606	ATP6V1A	√	√
P38646	HSPA9	√	√
P38919	EIF4A3	√	√
P38935	IGHMBP2	√	√
P39019	RPS19	√	√
P39023	RPL3	√	√
P39060	COL18A1	√	√
P39656	DDOST	√	√
P39687	ANP32A	√	√
P39748	FEN1	√	√
P39880	CUX1	√	√
P40121	CAPG	√	√
P40123	CAP2	√	√
P40222	TXLNA	√	√
P40227	CCT6A	√	√
P40337	VHL	√	√
P40424	PBX1	√	√
P40425	PBX2	√	√
P40426	PBX3	√
P40429	RPL13A	√	√
P40616	ARL1	√	√
P40763	STAT3	√	√
P40818	USP8	√	√
P40855	PEX19	√	√
P40925	MDH1	√	√
P40926	MDH2	√	√
P40937	RFC5	√	√
P40938	RFC3	√	√
P40939	HADHA	√	√
P41091	EIF2S3	√	√
P41134	ID1	√
P41162	ETV3	√	√
P41208	CETN2	√	√
P41214	EIF2D	√	√
P41219	PRPH	√	√
P41223	BUD31	√	√
P41227	NAA10	√	√
P41229	KDM5C	√	√
P41236	PPP1R2	√	√
P41240	CSK	√	√
P41247	PNPLA4	√	√
P41250	GARS1	√	√
P41252	IARS1	√	√
P41273	TNFSF9	√	√
P41440	SLC19A1	√	√
P41567	EIF1	√	√
P41587	VIPR2	√	√
P41732	TSPAN7	√	√
P41743	PRKCI	√	√
P42025	ACTR1B	√	√
P42126	ECI1	√	√
P42166	TMPO	√	√
P42167	TMPO	√	√
P42224	STAT1	√	√
P42226	STAT6	√	√
P42262	GRIA2	√
P42285	MTREX	√	√
P42336	PIK3CA	√	√
P42338	PIK3CB	√
P42345	MTOR	√	√
P42356	PI4KA	√	√
P42566	EPS15	√	√
P42574	CASP3	√	√
[truncated: 6,586 more rows]
