# Supplementary material for: An approach for the systematic profiling of drug-induced remodeling of RNA–RBP (RNA-binding protein) interactions
Source: Royal Society of Chemistry journal article supplement (doi:10.1039/d6ra00871b), 2026-05-19
Supplement: d6ra00871b9.xlsx [file d6ra00871b9.xlsx]

## Sheet: Table S9
Table S9. Altered RBPs upon risdiplam treatment
Uniprot accession	Gene Symbol	-Log(BH-ajusted P-value）	Log2 FC_RBPome	Log2 FC_global proteome	Log2 FC_corrected
Q9H0A0	NAT10	4.29621e-05	4.36691	-9.1157	-0.0102267	-9.10547
P53621	COPA	4.76928e-06	5.32155	-8.75524	-0.229517	-8.52573
P78527	PRKDC	7.65792e-07	6.11589	-8.04816	0.405456	-8.45361
Q14690	PDCD11	7.77365e-06	5.10937	-8.1	-0.577617	-7.52239
P46087	NOP2	3.0245e-05	4.51935	-5.93102	0.757387	-6.68841
Q9H583	HEATR1	5.19385e-07	6.28451	-6.70296	-0.198072	-6.50489
Q8IY81	FTSJ3	8.72578e-07	6.0592	-6.03041	0.348464	-6.37888
Q07020	RPL18	0.000172426	3.7634	-5.4822	0.792089	-6.27429
P20700	LMNB1	6.1965e-06	5.20785	-5.93939	0.305723	-6.24511
O76021	RSL1D1	1.26714e-07	6.89718	-5.73897	0.449016	-6.18798
Q9UKV3	ACIN1	1.00172e-06	5.99925	-5.78449	0.387044	-6.17153
Q9UQ35	SRRM2	7.65108e-07	6.11628	-6.26901	-0.119758	-6.14925
P62854	RPS26	0.000174546	3.75809	-5.64731	0.399258	-6.04657
Q92522	H1-10	0.000284736	3.54556	-5.06926	0.949658	-6.01892
P11388	TOP2A	2.06057e-05	4.68601	-5.93734	0.00746307	-5.9448
O15226	NKRF	8.00411e-06	5.09669	-6.06657	-0.327872	-5.7387
Q9NYF8	BCLAF1	1.54139e-07	6.81209	-5.99114	-0.265954	-5.72518
P46776	RPL27A	2.29985e-05	4.6383	-5.42752	0.212309	-5.63983
P42696	RBM34	0.000109842	3.95923	-4.9475	0.61588	-5.56338
Q99575	POP1	2.85384e-05	4.54457	-5.57975	-0.0180107	-5.56174
O14654	IRS4	1.01638e-07	6.99294	-5.58074	-0.129924	-5.45081
P83731	RPL24	9.94768e-06	5.00228	-5.04803	0.394625	-5.44265
O15042	U2SURP	1.94853e-06	5.71029	-5.70856	-0.284466	-5.4241
Q7L2E3	DHX30	1.46103e-05	4.83534	-5.48498	-0.163475	-5.32151
Q9NVP1	DDX18	2.07865e-07	6.68222	-5.40128	-0.213008	-5.18827
O00541	PES1	1.41157e-05	4.8503	-5.341	-0.165107	-5.17589
Q6P2Q9	PRPF8	1.20018e-06	5.92075	-4.85078	0.267235	-5.11802
P51532	SMARCA4	3.96183e-07	6.4021	-5.40766	-0.317904	-5.08975
Q9Y2W1	THRAP3	0.00665412	2.17691	-5.11776	-0.0671959	-5.05056
P16403	H1-2	2.5894e-07	6.5868	-4.52652	0.52315	-5.04967
Q9NR30	DDX21	8.21695e-07	6.08529	-4.75849	0.260196	-5.01868
P62995	TRA2B	3.11938e-05	4.50593	-4.5382	0.469561	-5.00776
Q9BQG0	MYBBP1A	3.59113e-05	4.44477	-4.7885	0.157404	-4.9459
O95232	LUC7L3	1.85685e-06	5.73122	-4.96518	-0.0574979	-4.90768
Q9BVP2	GNL3	6.78555e-06	5.16842	-4.78558	0.0887383	-4.87432
Q8NI36	WDR36	9.44036e-05	4.02501	-5.10776	-0.323828	-4.78393
Q9H307	PNN	8.68564e-05	4.0612	-4.36285	0.407728	-4.77058
Q15287	RNPS1	2.13923e-07	6.66974	-4.81146	-0.111013	-4.70045
Q14204	DYNC1H1	2.56595e-07	6.59075	-4.69534	-0.0466285	-4.64871
P35580	MYH10	0.000168031	3.77461	-4.86179	-0.217893	-4.6439
Q9UG63	ABCF2	0.00100829	2.99642	-4.76379	-0.162873	-4.60092
P15924	DSP	3.28547e-06	5.4834	-5.12462	-0.557785	-4.56683
P46977	STT3A	1.32548e-06	5.87763	-4.22466	0.277735	-4.50239
Q02543	RPL18A	8.41207e-07	6.0751	-3.93261	0.551689	-4.4843
Q6Y7W6	GIGYF2	0.0179631	1.74562	-5.008	-0.544131	-4.46387
Q9BZE4	GTPBP4	9.6763e-07	6.01429	-4.3145	0.136928	-4.45142
Q01780	EXOSC10	7.64877e-06	5.11641	-4.53363	-0.0838941	-4.44974
P62241	RPS8	4.7991e-07	6.31884	-4.09518	0.339318	-4.4345
Q5UIP0	RIF1	5.23208e-06	5.28133	-4.80373	-0.377515	-4.42622
P38159	RBMX	2.75816e-05	4.55938	-3.96332	0.43391429016572	-4.39723
P62244	RPS15A	3.81115e-05	4.41894	-4.26798	0.0681429	-4.33613
Q13428	TCOF1	5.55637e-06	5.25521	-3.59793	0.723315	-4.32124
P47897	QARS1	5.9662e-06	5.2243	-4.64019	-0.341004	-4.29918
Q14839	CHD4	0.000347452	3.4591	-4.63906	-0.348198	-4.29087
Q9H6R4	NOL6	1.68204e-06	5.77416	-4.87295	-0.609822	-4.26313
P04637	TP53	0.000180023	3.74467	-4.90044	-0.646079	-4.25436
Q8NE71	ABCF1	7.34583e-05	4.13396	-4.05256	0.0653167	-4.11788
Q9BYG3	NIFK	7.26975e-07	6.13848	-3.93144	0.165166	-4.0966
P61254	RPL26	0.00550506	2.25924	-3.68513	0.381196	-4.06633
Q8IYB3	SRRM1	2.08505e-05	4.68088	-3.58078	0.458153	-4.03893
P61513	RPL37A	0.000186899	3.72839	-3.15608	0.866804	-4.02288
P39023	RPL3	3.95902e-05	4.40241	-3.53707	0.460599	-3.99767
Q96KR1	ZFR	0.000173217	3.76141	-3.75475	0.188393	-3.94314
P40429	RPL13A	0.000144664	3.83964	-3.31331	0.607864	-3.92117
P61313	RPL15	4.69642e-06	5.32823	-3.47737	0.436024	-3.91339
Q7Z6Z7	HUWE1	0.000645212	3.1903	-3.97894	-0.0888959	-3.89004
Q6PKG0	LARP1	0.000798603	3.09767	-3.66356	0.218928	-3.88249
O95793	STAU1	1.07194e-06	5.96983	-4.18665	-0.344778	-3.84188
O43747	AP1G1	1.18314e-05	4.92697	-3.86144	-0.0460401	-3.8154
P36578	RPL4	4.43833e-06	5.35278	-3.17982	0.630115	-3.80994
P57088	TMEM33	0.000852223	3.06945	-3.57495	0.217023	-3.79197
Q99459	CDC5L	0.000155899	3.80716	-4.01695	-0.227936	-3.78901
O95782	AP2A1	0.000124446	3.90502	-3.96949	-0.185501	-3.78399
P27816	MAP4	4.73557e-06	5.32463	-2.99419	0.76873	-3.76292
Q02878	RPL6	8.63953e-06	5.06351	-3.22583	0.531832	-3.75766
P62750	RPL23A	2.08582e-05	4.68072	-3.53034	0.226883	-3.75722
O75717	WDHD1	0.0019603	2.70768	-3.26713	0.46317	-3.7303
O00571	DDX3X	1.9359e-06	5.71312	-4.04053	-0.325952	-3.71458
P62424	RPL7A	2.00996e-05	4.69681	-2.83146	0.852521	-3.68398
O75367	MACROH2A1	3.11465e-06	5.50659	-3.50288	0.167855	-3.67073
P46779	RPL28	2.48753e-05	4.60423	-3.03785	0.628017	-3.66586
O75616	ERAL1	0.000721212	3.14194	-3.57744	0.064475	-3.64191
P48634	PRRC2A	0.000220024	3.65753	-3.6643	-0.0400732	-3.62423
O75400	PRPF40A	0.00013592	3.86672	-3.79865	-0.175237	-3.62341
P62910	RPL32	0.000201623	3.69546	-3.2164	0.398395	-3.6148
O95104	SCAF4	0.000211894	3.67388	-4.22112	-0.612101	-3.60902
O43242	PSMD3	9.52889e-05	4.02096	-3.48812	0.109654	-3.59777
O75694	NUP155	0.00029671	3.52767	-4.10219	-0.517852	-3.58433
Q00839	HNRNPU	2.1347e-06	5.67066	-3.34514	0.224876	-3.57002
Q8WTT2	NOC3L	2.5617e-06	5.59147	-3.5137	0.0530654	-3.56677
Q01130	SRSF2	0.000551016	3.25884	-3.35737	0.156724	-3.51409
Q99848	EBNA1BP2	0.000813891	3.08943	-3.62199	-0.135443	-3.48655
Q14980	NUMA1	0.022853	1.64106	-3.44399	0.037787	-3.48178
P12235	SLC25A4	0.00104864	2.97937	-2.83087	0.613152	-3.44402
P27635	RPL10	2.11095e-05	4.67552	-3.21394	0.227154	-3.4411
O15371	EIF3D	0.000106905	3.971	-3.6023	-0.163316	-3.43899
Q5QJE6	DNTTIP2	2.42766e-05	4.61481	-3.9636	-0.526013	-3.43759
P61353	RPL27	5.68332e-05	4.2454	-3.4042	0.032827	-3.43702
P18621	RPL17	0.000822822	3.08469	-3.6071	-0.185253	-3.42184
P83881	RPL36A	0.00144602	2.83983	-2.86513	0.509031	-3.37416
Q9NW13	RBM28	0.000680283	3.16731	-3.04133	0.213748	-3.25507
P62266	RPS23	0.00035498	3.4498	-3.02872	0.223424	-3.25215
P62753	RPS6	0.000217777	3.66199	-3.0586	0.185578	-3.24418
P62280	RPS11	3.31976e-06	5.47889	-3.23825	0.00439038	-3.24264
P11387	TOP1	6.51356e-05	4.18618	-3.96362	-0.721693	-3.24193
P51858	HDGF	0.000358376	3.44566	-2.94193	0.296147	-3.23808
Q9Y3T9	NOC2L	5.48942e-06	5.26047	-3.46496	-0.242414	-3.22255
Q14498	RBM39	3.43924e-05	4.46354	-3.21356	0.00753881	-3.2211
Q8NCA5	FAM98A	2.31394e-06	5.63565	-3.71341	-0.496335	-3.21708
P08621	SNRNP70	0.00137232	2.86254	-3.07087	0.140078	-3.21095
Q08945	SSRP1	0.000608593	3.21567	-3.34425	-0.154995	-3.18926
Q8IX12	CCAR1	0.0473821	1.32439	-2.74567	0.42149	-3.16716
P62917	RPL8	7.05759e-05	4.15134	-2.73366	0.427997	-3.16165
Q8TEQ6	GEMIN5	7.03303e-06	5.15286	-3.4113	-0.251215	-3.16009
Q8IWX8	CHERP	1.81409e-05	4.74134	-3.47063	-0.314994	-3.15564
P05141	SLC25A5	4.45648e-05	4.35101	-2.2182	0.934165	-3.15237
Q09161	NCBP1	6.05488e-05	4.21789	-3.76368	-0.645056	-3.11862
Q5SY16	NOL9	9.66357e-06	5.01486	-3.48765	-0.373003	-3.11465
Q5VYK3	ECPAS	6.38839e-05	4.19461	-3.59189	-0.4874	-3.10449
P09429	HMGB1	0.000569812	3.24427	-2.57702	0.525782	-3.1028
Q96PK6	RBM14	1.98319e-05	4.70264	-3.15302	-0.0551319	-3.09789
Q9NVU7	SDAD1	0.00155721	2.80765	-3.03998	0.0423293	-3.08231
Q9HAV4	XPO5	6.42649e-05	4.19203	-3.7989	-0.769795	-3.02911
Q9ULV4	CORO1C	0.00927571	2.03265	-2.46854	0.558903	-3.02745
Q03701	CEBPZ	0.000954977	3.02001	-3.67553	-0.652235	-3.0233
P62829	RPL23	6.14167e-05	4.21171	-2.45957	0.557493	-3.01706
Q9BW92	TARS2	4.40637e-05	4.35592	-2.86655	0.14181	-3.00836
P49792	RANBP2	0.000212862	3.6719	-3.17649	-0.182969	-2.99352
Q53GQ0	HSD17B12	7.52104e-06	5.12372	-3.30931	-0.316872	-2.99244
Q9Y383	LUC7L2	2.69705e-05	4.56911	-3.16042	-0.226819	-2.9336
Q08170	SRSF4	0.000227065	3.64385	-3.04348	-0.181064	-2.86241
Q7Z2W4	ZC3HAV1	8.49102e-05	4.07104	-2.98003	-0.128023	-2.85201
O15347	HMGB3	0.00291654	2.53513	-2.30609	0.517018	-2.82311
P46781	RPS9	2.73684e-05	4.56275	-2.81887	-0.0334912	-2.78538
Q15149	PLEC	6.89798e-05	4.16128	-3.08263	-0.316968	-2.76566
Q3ZCQ8	TIMM50	0.00139841	2.85436	-2.23031	0.523722	-2.75403
P30876	POLR2B	0.000339072	3.46971	-2.83158	-0.082477	-2.74911
Q15233	NONO	2.85423e-05	4.54451	-2.5976	0.145176	-2.74278
A1L0T0	ILVBL	0.00699199	2.1554	-2.16433	0.568985	-2.73332
Q8WUM0	NUP133	0.0039561	2.40273	-2.85572	-0.134609	-2.72112
Q9P258	RCC2	0.000247583	3.60628	-2.50024	0.218443	-2.71868
Q96AG4	LRRC59	0.000272304	3.56495	-3.2977	-0.580684	-2.71701
P41252	IARS1	4.38683e-05	4.35785	-2.63576	0.0789266	-2.71469
Q13423	NNT	0.00403532	2.39412	-2.68921	0.00232957	-2.69154
P47914	RPL29	0.000238073	3.62329	-2.13769	0.543739	-2.68143
Q9UBX3	SLC25A10	0.00273347	2.56329	-2.44905	0.224956	-2.67401
P12955	PEPD	3.51429e-05	4.45416	-2.75066	-0.107705	-2.64295
Q13595	TRA2A	5.80578e-05	4.23614	-2.57141	0.0628015	-2.63421
Q9NRZ9	HELLS	3.84038e-05	4.41563	-3.39226	-0.759117	-2.63314
P18124	RPL7	0.000219172	3.65921	-2.08516	0.503344	-2.58851
Q16629	SRSF7	0.0402136	1.39563	-2.17506	0.403996	-2.57906
P62701	RPS4X	2.83142e-05	4.548	-2.38626	0.191192	-2.57745
Q13618	CUL3	3.14757e-05	4.50202	-3.00722	-0.464011	-2.54321
O76094	SRP72	8.24391e-05	4.08387	-2.8603	-0.347033	-2.51327
O43395	PRPF3	0.000138437	3.85875	-2.89802	-0.411832	-2.48619
O43143	DHX15	0.000398015	3.4001	-2.50477	-0.0215711	-2.4832
Q9Y2R4	DDX52	0.00843993	2.07366	-3.15427	-0.676145	-2.47812
Q86VP6	CAND1	6.58489e-05	4.18145	-3.00847	-0.549595	-2.45888
Q00325	SLC25A3	0.000485485	3.31382	-1.53699	0.915997	-2.45299
Q9H0D6	XRN2	3.37461e-05	4.47178	-3.06051	-0.62871	-2.4318
Q9NZB2	FAM120A	1.14586e-05	4.94087	-3.00373	-0.59974	-2.40399
Q14152	EIF3A	0.000102044	3.99121	-2.53378	-0.130241	-2.40353
Q13573	SNW1	0.000109079	3.96226	-2.88593	-0.482905	-2.40302
P07814	EPRS1	0.000785131	3.10506	-2.40437	-0.0244867	-2.37989
P11498	PC	0.000401855	3.39593	-2.19703	0.179718	-2.37675
P42677	RPS27	4.86511e-05	4.31291	-3.32563	-0.960084	-2.36555
P29372	MPG	1.22185e-05	4.91298	-3.13379	-0.773564	-2.36023
Q96SB4	SRPK1	0.000245429	3.61007	-3.14187	-0.784398	-2.35748
P50570	DNM2	0.00226746	2.64446	-2.52539	-0.170406	-2.35498
P18077	RPL35A	0.0037775	2.4228	-2.04278	0.299304	-2.34209
Q96ST3	SIN3A	9.65811e-05	4.01511	-2.73488	-0.410488	-2.3244
Q16513	PKN2	0.000695376	3.15778	-2.43214	-0.112889	-2.31925
Q9BUQ8	DDX23	5.4207e-05	4.26594	-2.99027	-0.680713	-2.30956
Q07666	KHDRBS1	2.06068e-05	4.68599	-2.48074	-0.173021	-2.30772
P42167	TMPO	0.00194138	2.71189	-2.45401	-0.172789	-2.28122
Q13155	AIMP2	0.00192424	2.71574	-1.88812	0.39216	-2.28028
P32969	RPL9	3.77588e-05	4.42298	-2.43229	-0.164869	-2.26742
Q92841	DDX17	7.01525e-06	5.15396	-2.80738	-0.556458	-2.25092
P26373	RPL13	9.88754e-05	4.00491	-2.31644	-0.081828	-2.23461
P27105	STOM	0.0368207	1.43391	-1.76855	0.46194	-2.23049
Q92734	TFG	0.0007583	3.12016	-1.75718	0.471539	-2.22872
P35579	MYH9	8.91392e-05	4.04993	-1.97871	0.241624	-2.22033
P55265	ADAR	0.00155259	2.80894	-2.0738	0.12235	-2.19615
P61619	SEC61A1	0.000739161	3.13126	-1.51789	0.675834	-2.19372
Q9NVI7	ATAD3A	0.00103391	2.98552	-2.44339	-0.255816	-2.18758
Q08211	DHX9	8.86211e-06	5.05246	-2.55885	-0.372129	-2.18672
Q7Z3K3	POGZ	0.000907521	3.04214	-2.42106	-0.257181	-2.16388
O75475	PSIP1	0.000133046	3.876	-2.05202	0.0750735	-2.12709
O60762	DPM1	0.033454	1.47555	-1.94101	0.158266	-2.09928
P53597	SUCLG1	0.0150722	1.82182	-1.84533	0.217826	-2.06316
O75533	SF3B1	4.83072e-05	4.31599	-2.44197	-0.389434	-2.05253
O60506	SYNCRIP	0.000449774	3.34701	-1.89812	0.143277	-2.04139
P54136	RARS1	0.000113837	3.94372	-2.69795	-0.661133	-2.03681
Q4VCS5	AMOT	8.70162e-05	4.0604	-2.83259	-0.814117	-2.01847
P35268	RPL22	0.00216402	2.66474	-1.84024	0.170413	-2.01066
P17612	PRKACA	0.00894705	2.04832	-1.89725	0.100482	-1.99773
Q8TC12	RDH11	0.00119373	2.9231	-1.40979	0.58733	-1.99712
Q5T8P6	RBM26	8.44027e-05	4.07364	-2.30045	-0.309291	-1.99115
P51610	HCFC1	0.000359108	3.44478	-1.90692	0.0772846	-1.98421
O60264	SMARCA5	9.16472e-05	4.03788	-2.62079	-0.647461	-1.97333
P84098	RPL19	0.000339266	3.46946	-2.0258	-0.0539274	-1.97187
Q12904	AIMP1	7.84589e-05	4.10536	-1.99605	-0.0484966	-1.94756
P52948	NUP98	0.0454299	1.34266	-2.22034	-0.276045	-1.9443
O75152	ZC3H11A	0.000269768	3.56901	-1.92631	0.0104609	-1.93677
O43390	HNRNPR	0.000334879	3.47511	-1.78472	0.139851	-1.92457
Q9H2G2	SLK	0.000367767	3.43443	-1.79298	0.127797	-1.92077
Q14683	SMC1A	0.000142439	3.84637	-2.29806	-0.385997	-1.91207
Q14258	TRIM25	0.0242184	1.61585	-2.03598	-0.143303	-1.89268
O95602	POLR1A	0.00485812	2.31353	-2.06563	-0.174206	-1.89143
Q9BPX3	NCAPG	2.14458e-05	4.66866	-2.26901	-0.392097	-1.87692
Q9H9A6	LRRC40	0.00153116	2.81498	-1.93513	-0.0643955	-1.87073
P20042	EIF2S2	8.62471e-05	4.06426	-1.83211	0.0330141	-1.86512
Q9Y450	HBS1L	0.020836	1.68119	-2.04047	-0.184106	-1.85637
O43670	ZNF207	0.0232952	1.63273	-1.88548	-0.038349	-1.84713
Q8IYB8	SUPV3L1	0.0058298	2.23435	-1.90676	-0.076221	-1.83054
Q13151	HNRNPA0	0.0182482	1.73878	-1.48652	0.340131	-1.82665
P17858	PFKL	0.00255834	2.59204	-1.49973	0.324744	-1.82447
Q6PJT7	ZC3H14	0.000520919	3.28323	-1.88817	-0.0684378	-1.81973
Q86Y56	DNAAF5	0.000994378	3.00245	-2.63198	-0.816024	-1.81595
Q9Y5B9	SUPT16H	9.79259e-05	4.0091	-2.53079	-0.718128	-1.81266
P43897	TSFM	0.00831829	2.07997	-1.61217	0.200458	-1.81263
P50914	RPL14	0.000169212	3.77157	-2.44555	-0.644754	-1.80079
Q9BRJ6	CHLSN	0.0290899	1.53626	-1.95294	-0.154294	-1.79864
P56182	RRP1	0.00917176	2.03755	-2.12152	-0.323801	-1.79772
Q92973	TNPO1	0.00541862	2.26611	-2.23727	-0.466396	-1.77087
O43290	SART1	0.000538485	3.26883	-2.30565	-0.566968	-1.73868
Q15717	ELAVL1	0.00460643	2.33664	-1.70472	0.0294285	-1.73415
P49642	PRIM1	0.000242786	3.61478	-1.74827	-0.0153472	-1.73293
Q9P2J5	LARS1	0.000650142	3.18699	-1.49183	0.233174	-1.725
Q9NYK5	MRPL39	0.00320253	2.49451	-1.65442	0.0609873	-1.71541
Q93009	USP7	0.0378562	1.42186	-1.80475	-0.0906655	-1.71409
Q16527	CSRP2	0.0124385	1.90523	-1.18942	0.512843	-1.70226
P09972	ALDOC	0.0495708	1.30477	-1.34207	0.351723	-1.69379
P35611	ADD1	0.0281067	1.55119	-1.69669	-0.00566859	-1.69102
P09661	SNRPA1	0.00329061	2.48272	-1.4467	0.242344	-1.68904
Q9NWU5	MRPL22	0.00533214	2.2731	-1.3921	0.294658	-1.68676
P18754	RCC1	0.0025948	2.5859	-1.55773	0.120578	-1.67831
P61803	DAD1	0.00339912	2.46863	-1.26076	0.415839	-1.6766
P35241	RDX	0.00995921	2.00177	-2.08573	-0.421694	-1.66403
Q02978	SLC25A11	0.00554582	2.25603	-1.10952	0.553389	-1.66291
Q9Y295	DRG1	0.000190746	3.71954	-2.3677	-0.72456	-1.64314
Q15003	NCAPH	0.00833785	2.07895	-1.96837	-0.331106	-1.63726
P16615	ATP2A2	0.000305059	3.51562	-1.70758	-0.0886771	-1.6189
P62263	RPS14	0.000142559	3.84601	-1.91697	-0.299053	-1.61792
P31689	DNAJA1	3.80034e-05	4.42018	-2.57366	-0.958521	-1.61514
P16989	YBX3	0.0145805	1.83623	-1.76151	-0.151675	-1.60983
Q9BY32	ITPA	0.00195127	2.70968	-1.66007	-0.0570926	-1.60298
Q9BXS5	AP1M1	0.00108797	2.96338	-2.24845	-0.662008	-1.58644
Q9NX20	MRPL16	0.00346734	2.46	-2.01312	-0.427236	-1.58588
P17844	DDX5	4.66406e-05	4.33124	-2.30063	-0.722527	-1.57811
Q06124	PTPN11	0.0121611	1.91503	-1.51804	0.0600479	-1.57809
P56192	MARS1	0.0378538	1.42189	-1.66577	-0.0929691	-1.5728
Q14103	HNRNPD	0.00398375	2.39971	-1.02974	0.53244	-1.56218
Q99613	EIF3C	0.0010506	2.97856	-2.14008	-0.580823	-1.55926
O60832	DKC1	0.00155574	2.80806	-1.48028	0.0774999	-1.55778
Q09666	AHNAK	0.039989	1.39806	-1.43589	0.1173	-1.55319
P53618	COPB1	0.000272431	3.56474	-1.99556	-0.460692	-1.53487
Q9BVJ6	UTP14A	0.000579448	3.23699	-2.20191	-0.669763	-1.53215
Q9Y262	EIF3L	0.0192078	1.71652	-1.84968	-0.335266	-1.51441
Q9GZN8	ADISSP	0.0206025	1.68608	-1.80113	-0.295089	-1.50604
Q7L5D6	GET4	0.0248649	1.60441	-1.37124	0.134595	-1.50583
P19367	HK1	0.00691014	2.16051	-1.3	0.205015	-1.50502
Q92530	PSMF1	0.00256463	2.59098	-1.26682	0.229943	-1.49676
O00429	DNM1L	0.00231949	2.63461	-1.54193	-0.0473112	-1.49462
Q03252	LMNB2	0.002316	2.63526	-1.48325	-0.00256282	-1.48069
O75683	SURF6	0.0085156	2.06978	-1.37957	0.0780741	-1.45764
Q16850	CYP51A1	0.000841049	3.07518	-1.43251	0.0165216	-1.44903
O00267	SUPT5H	0.00863801	2.06359	-1.68749	-0.24077	-1.44672
Q9NYH9	UTP6	0.000578695	3.23755	-2.35364	-0.913867	-1.43977
P33993	MCM7	0.000616632	3.20997	-1.3506	0.0826786	-1.43328
O75821	EIF3G	0.00410047	2.38717	-1.14423	0.271314	-1.41555
P26640	VARS1	0.0132039	1.8793	-1.76094	-0.356864	-1.40408
P32322	PYCR1	0.00313585	2.50364	-1.55521	-0.160713	-1.39449
Q14C86	GAPVD1	0.00371191	2.4304	-1.56403	-0.220022	-1.344
P15880	RPS2	0.0322202	1.49187	-0.748862	0.593542	-1.3424
Q05519	SRSF11	0.00107163	2.96996	-1.40815	-0.0772104	-1.33094
Q15645	TRIP13	0.0170588	1.76805	-1.38008	-0.0718854	-1.3082
P46777	RPL5	0.00453525	2.3434	-0.972847	0.332777	-1.30562
Q9H078	CLPB	0.00228076	2.64192	-1.7328	-0.430078	-1.30272
P23396	RPS3	0.0108591	1.96421	-0.979817	0.322091	-1.30191
P62249	RPS16	0.000550931	3.2589	-1.36763	-0.0751728	-1.29245
P09874	PARP1	0.00290714	2.53653	-1.09334	0.188081	-1.28143
P25440	BRD2	0.000273441	3.56314	-1.79469	-0.516838	-1.27785
Q16891	IMMT	0.000540816	3.26695	-1.63142	-0.363056	-1.26836
P02545	LMNA	0.00665395	2.17692	-1.00686	0.260299	-1.26716
P54886	ALDH18A1	0.00266312	2.57461	-1.24648	0.0161282	-1.26261
O95573	ACSL3	0.00301279	2.52103	-1.41716	-0.168713	-1.24845
Q5BKZ1	ZNF326	0.00542783	2.26537	-0.878991	0.367075	-1.24607
O75153	CLUH	0.0125762	1.90045	-1.57934	-0.334773	-1.24457
O60232	ZNRD2	0.0241809	1.61653	-1.29248	-0.0680989	-1.22438
O95251	KAT7	0.0250801	1.60067	-1.49038	-0.267148	-1.22323
O95347	SMC2	0.000922774	3.0349	-1.24994	-0.035878	-1.21406
Q53S33	BOLA3	0.0286604	1.54272	-1.04353	0.151929	-1.19546
Q8N9T8	KRI1	0.01662	1.77937	-1.80554	-0.610711	-1.19483
Q53H12	AGK	0.000972644	3.01205	-1.5805	-0.409426	-1.17108
P51991	HNRNPA3	0.00158811	2.79912	-1.41489	-0.251174	-1.16371
Q9Y2L1	DIS3	0.000985173	3.00649	-1.50757	-0.369603	-1.13797
O94906	PRPF6	0.000239887	3.61999	-1.76758	-0.633182	-1.1344
Q12931	TRAP1	0.00246668	2.60789	-1.20845	-0.0827114	-1.12574
Q6P1L8	MRPL14	0.00620015	2.2076	-1.3115	-0.209635	-1.10186
P49327	FASN	0.00138031	2.86002	-1.10656	-0.00823369	-1.09833
Q14137	BOP1	0.0301863	1.52019	-1.70369	-0.619418	-1.08427
O14980	XPO1	0.000641937	3.19251	-1.55805	-0.490811	-1.06724
P23246	SFPQ	0.00302016	2.51997	-1.15209	-0.0873093	-1.06478
Q6DD88	ATL3	0.0100006	1.99997	-1.30655	-0.264871	-1.04168
Q8WWM7	ATXN2L	0.0221548	1.65453	-1.19216	-0.154324	-1.03784
O75794	CDC123	0.0129838	1.8866	-1.59487	-0.560525	-1.03435
P53007	SLC25A1	0.0436056	1.36046	-0.621372	0.408131	-1.0295
P20290	BTF3	0.00153742	2.81321	-1.37725	-0.349589	-1.02766
Q12906	ILF3	0.00322872	2.49097	-1.01766	0.00068605	-1.01835
O43896	KIF1C	0.017706	1.75188	-1.01739	-0.0165212	-1.00087
O75643	SNRNP200	0.00174157	2.75906	-1.27429	-0.273838	-1.00045
Q9Y266	NUDC	0.0109994	1.95863	1.1298	0.122585	1.00721
Q9H0U4	RAB1B	0.00419305	2.37747	1.10059	0.0887542	1.01184
Q14847	LASP1	0.0180602	1.74328	1.49538	0.476319	1.01906
Q15056	EIF4H	0.00171301	2.76624	1.85392	0.827743	1.02618
P78344	EIF4G2	0.0205446	1.6873	0.970692	-0.057829	1.02852
P61106	RAB14	0.0416119	1.38078	0.585192	-0.446603	1.03179
Q9HB40	SCPEP1	0.00607097	2.21674	1.11727	0.0847083	1.03256
P50995	ANXA11	0.00381441	2.41857	0.949641	-0.0858233	1.03546
Q9NTK5	OLA1	0.0490554	1.30931	0.97985	-0.0593731	1.03922
Q8NBU5	ATAD1	0.0236011	1.62707	0.806225	-0.24022	1.04644
P26639	TARS1	0.00160805	2.7937	1.84354	0.796489	1.04705
Q9UHV9	PFDN2	0.00417779	2.37905	1.23454	0.185968	1.04858
P04406	GAPDH	0.00139835	2.85438	1.47035	0.419797	1.05055
Q9UBC2	EPS15L1	0.00864469	2.06325	1.37103	0.317884	1.05314
Q14566	MCM6	0.00923575	2.03453	0.884977	-0.168904	1.05388
O94826	TOMM70	0.00287176	2.54185	1.10172	0.0445394	1.05718
P09012	SNRPA	0.0176358	1.75361	1.28613	0.224153	1.06198
Q9BZZ5	API5	0.0154646	1.81066	1.0859	0.0200639	1.06584
Q15019	SEPTIN2	0.0345233	1.46189	1.3193	0.249158	1.07014
P35998	PSMC2	0.0476759	1.3217	1.26924	0.193767	1.07547
O75369	FLNB	0.00427813	2.36875	1.09121	0.00172976	1.08948
Q00341	HDLBP	0.0341064	1.46716	1.10715	0.017109	1.09004
Q9UBI6	GNG12	0.00140897	2.8511	1.35719	0.266503	1.09069
P04075	ALDOA	0.00504771	2.29691	1.06801	-0.0311817	1.0992
Q9BZE1	MRPL37	0.0203051	1.69239	1.19833	0.0906009	1.10773
P29401	TKT	0.00474969	2.32333	1.15833	0.0472629	1.11107
P14174	MIF	0.00322038	2.49209	1.18696	0.0656616	1.1213
P61163	ACTR1A	0.00485109	2.31416	1.61641	0.489833	1.12657
P08579	SNRPB2	0.00981925	2.00792	1.84866	0.720371	1.12829
P30040	ERP29	0.00804964	2.09422	1.13556	0.00365672	1.13191
P27695	APEX1	0.0230628	1.63709	1.18576	0.0449562	1.1408
Q15084	PDIA6	0.0287553	1.54128	0.741907	-0.40676	1.14867
Q04917	YWHAH	0.0319514	1.49551	1.45314	0.303933	1.1492
P34932	HSPA4	0.00041464	3.38233	1.42679	0.273979	1.15281
P31150	GDI1	0.0286653	1.54264	1.56397	0.401666	1.1623
Q9UNZ2	NSFL1C	0.0368024	1.43412	1.27116	0.102242	1.16892
Q13435	SF3B2	0.00492082	2.30796	1.27629	0.100373	1.17592
P62310	LSM3	0.000499502	3.30146	1.36328	0.180085	1.18319
P78371	CCT2	0.000230701	3.63695	1.57949	0.393784	1.1857
P19338	NCL	0.00121465	2.91555	1.16426	-0.0258432	1.1901
P67809	YBX1	0.0305497	1.51499	0.657578	-0.53348	1.19106
P62269	RPS18	0.0107656	1.96796	1.3971	0.182424	1.21467
P13667	PDIA4	0.00135197	2.86903	1.37804	0.156678	1.22137
P37840	SNCA	0.0242064	1.61607	1.20625	-0.0214319	1.22769
P52815	MRPL12	0.00092663	3.03309	1.6682	0.438073	1.23013
P46459	NSF	0.00620478	2.20727	1.20415	-0.0298253	1.23397
P62306	SNRPF	0.00374176	2.42692	1.64137	0.403241	1.23813
P08559	PDHA1	0.00420013	2.37674	1.50441	0.264464	1.23994
Q9Y5L4	TIMM13	0.0298067	1.52569	1.62071	0.377308	1.2434
Q00796	SORD	0.00193527	2.71326	1.44034	0.19139	1.24895
Q9NPH2	ISYNA1	0.000825283	3.0834	1.45193	0.199196	1.25273
Q16658	FSCN1	0.0067414	2.17125	1.45989	0.19981	1.26008
Q5JRA6	MIA3	0.0195943	1.70787	1.0167	-0.248479	1.26517
Q01082	SPTBN1	0.00443002	2.35359	1.12385	-0.143672	1.26752
P48643	CCT5	0.00366415	2.43603	1.16554	-0.104654	1.27019
Q15029	EFTUD2	0.00680254	2.16733	1.00366	-0.267247	1.27091
P08195	SLC3A2	0.00741262	2.13003	1.48799	0.21546	1.27253
P22314	UBA1	0.000577764	3.23825	1.35272	0.0759784	1.27675
P62495	ETF1	0.0103796	1.98382	1.36118	0.081463	1.27972
P42126	ECI1	0.00249481	2.60296	1.71317	0.430156	1.28301
P15531	NME1	0.000445633	3.35102	1.4274	0.140432	1.28697
P05387	RPLP2	0.00486078	2.31329	0.925563	-0.361566	1.28713
O75439	PMPCB	0.00542535	2.26557	1.3447	0.0528663	1.29184
Q9HCC0	MCCC2	0.0045936	2.33785	0.942087	-0.356778	1.29887
Q9NQC3	RTN4	0.00706002	2.15119	1.51528	0.214889	1.30039
O43776	NARS1	0.00435904	2.36061	1.91952	0.610854	1.30867
P43487	RANBP1	0.000287054	3.54204	1.56286	0.249846	1.31302
P00338	LDHA	0.00257443	2.58932	1.10495	-0.210727	1.31568
Q9UNM6	PSMD13	0.00331112	2.48003	1.4189	0.102858	1.31604
P35244	RPA3	0.00588502	2.23025	1.90795	0.591269	1.31669
P14314	PRKCSH	0.0036671	2.43568	1.36829	0.0451845	1.3231
P07741	APRT	0.006739	2.1714	1.95921	0.63069	1.32852
P63104	YWHAZ	0.00014539	3.83747	1.73926	0.410365	1.32889
Q9Y490	TLN1	0.000902706	3.04445	1.40715	0.0690087	1.33815
Q5RKV6	EXOSC6	0.00497246	2.30343	1.35473	0.014586	1.34014
Q96CX2	KCTD12	0.00315082	2.50158	1.10022	-0.247907	1.34813
O43396	TXNL1	0.0287446	1.54144	1.24856	-0.105467	1.35402
Q5JTV8	TOR1AIP1	0.0117637	1.92946	1.0437	-0.310859	1.35456
P08133	ANXA6	0.00477459	2.32106	0.97998	-0.378309	1.35829
O43719	HTATSF1	0.00289299	2.53865	1.46683	0.10835	1.35848
P36542	ATP5F1C	0.00164591	2.78359	1.51677	0.157681	1.35909
P23526	AHCY	0.000547343	3.26174	1.53371	0.174393	1.35932
Q13442	PDAP1	0.0346247	1.46061	1.37107	-0.00247267	1.37354
P30086	PEBP1	0.00428514	2.36804	1.25072	-0.124778	1.37549
P35613	BSG	0.0399375	1.39862	1.33881	-0.040163	1.37897
P31930	UQCRC1	0.0138549	1.8584	1.23353	-0.148087	1.38162
P47985	UQCRFS1	0.00624203	2.20467	1.82326	0.439461	1.3838
Q9Y2R5	MRPS17	0.0303751	1.51748	1.34621	-0.0422913	1.38851
Q6UXN9	WDR82	0.00402508	2.39523	1.3537	-0.0453286	1.39903
Q0VDF9	HSPA14	0.00518871	2.28494	1.25672	-0.143771	1.40049
P55072	VCP	0.000154231	3.81183	1.81703	0.40833	1.4087
P05783	KRT18	0.000177499	3.7508	2.17751	0.758656	1.41885
P37837	TALDO1	0.00884786	2.05316	1.58247	0.161743	1.42073
O95777	LSM8	0.000313095	3.50432	2.18814	0.742789	1.44535
P28838	LAP3	0.000409066	3.38821	1.52916	0.0796491	1.44951
Q9BXW9	FANCD2	0.0133587	1.87424	0.980332	-0.469436	1.44977
O43615	TIMM44	0.00294608	2.53075	1.71698	0.261421	1.45556
Q8NCW5	NAXE	0.00309915	2.50876	1.88941	0.428481	1.46092
Q14671	PUM1	0.00134789	2.87034	1.41976	-0.0427641	1.46252
Q12792	TWF1	0.0404678	1.39289	1.33649	-0.127709	1.4642
Q9H773	DCTPP1	0.00564254	2.24853	1.41652	-0.0658468	1.48236
Q01469	FABP5	0.000617844	3.20912	2.33622	0.852122	1.48409
Q15417	CNN3	0.0479284	1.31941	1.78851	0.304121	1.48439
P46060	RANGAP1	0.00420707	2.37602	1.46441	-0.0333835	1.49779
Q8TBC4	UBA3	0.00107095	2.97023	1.8265	0.317579	1.50892
O14745	NHERF1	0.00318464	2.49694	1.58742	0.0600934	1.52733
P42771	CDKN2A	0.000248949	3.60389	1.8247	0.292149	1.53255
P22695	UQCRC2	0.00049908	3.30183	1.42008	-0.121968	1.54204
P43246	MSH2	0.0165732	1.78059	1.2822	-0.263529	1.54573
P00505	GOT2	0.000381383	3.41864	1.65948	0.112545	1.54693
P62258	YWHAE	0.000202803	3.69292	1.89183	0.340032	1.5518
P21281	ATP6V1B2	0.00387253	2.41201	1.89171	0.32978	1.56193
O00291	HIP1	0.00103615	2.98458	1.5582	-0.00722502	1.56543
Q9NTZ6	RBM12	0.0236512	1.62615	1.70627	0.129924	1.57634
O60664	PLIN3	0.0086133	2.06483	1.41483	-0.163094	1.57793
P62879	GNB2	0.0268458	1.57112	1.52297	-0.0619824	1.58495
P50502	ST13	0.000527551	3.27774	1.63629	0.0475812	1.5887
P31946	YWHAB	0.000631291	3.19977	2.0553	0.464176	1.59112
Q7L2H7	EIF3M	0.0433793	1.36272	1.48269	-0.109007	1.59169
O43504	LAMTOR5	0.0163672	1.78602	1.14063	-0.45362	1.59425
Q9Y617	PSAT1	0.000369553	3.43232	1.81969	0.224924	1.59477
P49321	NASP	0.00453328	2.34359	1.43401	-0.162418	1.59643
Q15459	SF3A1	0.000515117	3.28809	1.41386	-0.19063	1.60449
P61289	PSME3	0.018248	1.73878	1.12023	-0.487283	1.60752
Q9Y230	RUVBL2	0.00227819	2.64241	1.7544	0.144132	1.61026
P18859	ATP5PF	0.00520426	2.28364	1.23113	-0.386456	1.61758
P62942	FKBP1A	0.000150391	3.82278	1.76506	0.129119	1.63594
Q8WW12	PCNP	0.0187649	1.72665	1.82049	0.181656	1.63883
P55795	HNRNPH2	0.00209556	2.6787	1.38949	-0.256035	1.64553
Q9Y265	RUVBL1	0.00072669	3.13865	1.65784	0.00847822	1.64937
P25787	PSMA2	0.00013228	3.87851	2.22946	0.579065	1.65039
Q14974	KPNB1	0.00385861	2.41357	1.53318	-0.118456	1.65163
P11021	HSPA5	0.000263113	3.57986	1.54283	-0.110639	1.65347
P45954	ACADSB	0.00281097	2.55114	1.25985	-0.411893	1.67174
Q9UKY7	CDV3	0.00391582	2.40718	1.54909	-0.123022	1.67211
O60763	USO1	0.0199063	1.70101	1.03693	-0.63567	1.6726
P30044	PRDX5	0.00698983	2.15553	1.4822	-0.190972	1.67317
P78347	GTF2I	0.00102692	2.98846	1.72636	0.0502335	1.67612
Q08J23	NSUN2	0.0068513	2.16423	1.49329	-0.183958	1.67725
Q9P289	STK26	0.00217374	2.66279	1.77762	0.097777	1.67985
P49419	ALDH7A1	0.000561916	3.25033	1.78714	0.106376	1.68077
Q96FW1	OTUB1	0.0038461	2.41498	1.32314	-0.360715	1.68385
P28074	PSMB5	5.59283e-05	4.25237	2.12887	0.43457	1.6943
Q9NUJ1	ABHD10	0.000297455	3.52658	1.46751	-0.226841	1.69435
P43490	NAMPT	0.000493234	3.30695	1.75005	0.0520663	1.69799
P62993	GRB2	0.00287209	2.5418	1.79237	0.0928506	1.69952
P06576	ATP5F1B	0.000244408	3.61189	1.86192	0.156908	1.70501
P55084	HADHB	0.000180517	3.74348	1.83508	0.124519	1.71057
O95831	AIFM1	0.00252177	2.59829	1.61955	-0.0960415	1.7156
P08243	ASNS	9.42802e-05	4.02558	2.10412	0.381422	1.7227
P00558	PGK1	5.54941e-05	4.25575	2.1631	0.428053	1.73505
P12081	HARS1	0.00059149	3.22805	2.24096	0.503378	1.73758
P31939	ATIC	0.000331628	3.47935	1.97557	0.234303	1.74127
P61088	UBE2N	0.00033529	3.47458	1.9754	0.234074	1.74132
Q9NQG5	RPRD1B	0.000124105	3.90621	1.85122	0.102159	1.74906
Q16698	DECR1	0.00569653	2.24439	2.22664	0.468685	1.75795
Q9BQ69	MACROD1	3.1396e-05	4.50313	2.23488	0.475817	1.75907
Q7L1Q6	BZW1	0.00521364	2.28286	1.74603	-0.0162707	1.7623
Q99798	ACO2	0.000550034	3.25961	1.62228	-0.142745	1.76502
P40938	RFC3	0.00072887	3.13735	1.43385	-0.33767	1.77152
Q13838	DDX39B	0.000952326	3.02121	1.40578	-0.368334	1.77412
O15372	EIF3H	0.0346825	1.45989	1.7631	-0.0147002	1.7778
P00367	GLUD1	0.000349674	3.45634	1.87853	0.0995508	1.77898
P40925	MDH1	0.000109892	3.95903	2.44656	0.667453	1.7791
Q16643	DBN1	0.00780225	2.10778	1.48005	-0.306616	1.78667
P12268	IMPDH2	0.000107815	3.96732	1.79665	0.00840171	1.78824
P27824	CANX	0.000101855	3.99202	1.90785	0.105138	1.80271
P46063	RECQL	0.0121412	1.91574	2.13523	0.3293	1.80593
Q9UHX1	PUF60	0.00117142	2.93129	1.58075	-0.233108	1.81386
P61981	YWHAG	0.000184897	3.73307	1.83698	0.0153562	1.82163
Q99627	COPS8	0.000292882	3.53331	1.88557	0.0637406	1.82183
O43707	ACTN4	0.000539193	3.26826	1.77728	-0.0499503	1.82723
P11766	ADH5	0.00352881	2.45237	2.12418	0.294313	1.82987
P30837	ALDH1B1	0.0293994	1.53166	1.42448	-0.416559	1.84104
P40855	PEX19	0.0384678	1.4149	1.95302	0.104047	1.84897
P19388	POLR2E	0.00063522	3.19708	1.83143	-0.0177351	1.84916
Q9Y3Z3	SAMHD1	0.00542709	2.26543	1.69884	-0.162195	1.86103
P04181	OAT	0.000538096	3.26914	1.82466	-0.0490184	1.87368
Q16576	RBBP7	0.0473555	1.32463	1.01771	-0.857298	1.87501
O14818	PSMA7	0.00123894	2.90695	1.69128	-0.196991	1.88827
P36871	PGM1	0.00164017	2.78511	2.01039	0.120786	1.8896
P51571	SSR4	0.0238932	1.62173	1.22897	-0.664241	1.89321
P30048	PRDX3	0.000170359	3.76863	1.9728	0.0622164	1.91059
P34897	SHMT2	4.81529e-05	4.31738	2.31627	0.404827	1.91144
Q9C0C9	UBE2O	0.00730873	2.13616	1.64786	-0.278823	1.92669
Q9Y281	CFL2	0.00879325	2.05585	1.99242	0.0635969	1.92882
Q15293	RCN1	0.000168976	3.77217	2.36346	0.433969	1.92949
P22307	SCP2	3.55194e-05	4.44953	2.15289	0.223047	1.92985
P12814	ACTN1	0.016573	1.7806	1.7925	-0.144526	1.93702
Q13813	SPTAN1	0.0012483	2.90368	1.80978	-0.136612	1.94639
P39019	RPS19	9.67515e-05	4.01434	2.26364	0.316351	1.94729
O60220	TIMM8A	0.000516453	3.28697	2.11776	0.170195	1.94756
Q8IZL8	PELP1	0.0383707	1.416	1.72549	-0.228938	1.95442
P05386	RPLP1	9.00796e-05	4.04537	2.00337	0.0439099	1.95946
Q07021	C1QBP	0.000923036	3.03478	1.68931	-0.27184	1.96115
Q02790	FKBP4	0.000480346	3.31845	2.028	0.0643933	1.96361
P60900	PSMA6	2.63414e-05	4.57936	2.6137	0.64561	1.96809
Q8N4Q1	CHCHD4	0.0384845	1.41471	1.24003	-0.729404	1.96944
P13861	PRKAR2A	0.00708304	2.14978	2.09577	0.123461	1.97231
P82979	SARNP	0.0222414	1.65284	2.16205	0.185022	1.97703
P52907	CAPZA1	0.00318373	2.49706	1.58428	-0.396427	1.98071
P07237	P4HB	0.0011957	2.92238	1.77978	-0.205435	1.98522
P48147	PREP	0.0140829	1.85131	2.24088	0.241387	1.99949
P49755	TMED10	0.00514218	2.28885	1.24595	-0.754765	2.00072
P37198	NUP62	0.00208276	2.68136	1.42375	-0.581487	2.00524
P08574	CYC1	0.0114691	1.94047	1.39733	-0.611782	2.00911
Q9UJZ1	STOML2	0.000277372	3.55694	2.16984	0.154734	2.01511
O75390	CS	0.000339987	3.46854	1.96426	-0.0613365	2.0256
P30084	ECHS1	0.000390572	3.4083	2.02899	-0.00827579	2.03727
P30101	PDIA3	0.000368428	3.43365	2.10997	0.0578831	2.05209
Q99956	DUSP9	0.00312719	2.50485	1.44952	-0.609887	2.0594
Q9H1E3	NUCKS1	0.000231148	3.63611	2.13427	0.0692968	2.06497
P49588	AARS1	0.00071973	3.14283	2.31255	0.24389	2.06866
Q15907	RAB11B	0.00670751	2.17344	2.23506	0.163609	2.07145
P18669	PGAM1	0.00121823	2.91427	1.71563	-0.365551	2.08118
O76031	CLPX	0.000442897	3.3537	1.72438	-0.356976	2.08136
P11310	ACADM	0.000632883	3.19868	2.33784	0.253419	2.08442
P11177	PDHB	0.000615797	3.21056	1.85662	-0.227855	2.08447
Q16531	DDB1	0.000627684	3.20226	1.90273	-0.191576	2.09431
P30519	HMOX2	0.0376981	1.42368	1.87384	-0.223467	2.0973
P21912	SDHB	0.00397463	2.4007	2.4382	0.317952	2.12025
Q96KB5	PBK	0.0204756	1.68876	2.29692	0.161481	2.13544
P09622	DLD	4.09149e-05	4.38812	2.56282	0.424795	2.13803
P68036	UBE2L3	0.000531249	3.2747	2.13153	-0.00940668	2.14093
O75947	ATP5PD	8.75273e-05	4.05786	2.14398	-0.00470015	2.14868
Q13561	DCTN2	0.000273051	3.56376	1.88242	-0.271583	2.15401
P23434	GCSH	0.00542474	2.26562	2.3185	0.164252	2.15425
P13995	MTHFD2	0.00184197	2.73472	2.31629	0.160257	2.15603
Q9BQ67	GRWD1	0.00333718	2.47662	2.18534	0.0220456	2.16329
P40926	MDH2	3.12145e-05	4.50564	2.42787	0.257212	2.17066
P15374	UCHL3	0.00019753	3.70437	2.07294	-0.0980453	2.17099
P40222	TXLNA	0.000135143	3.86921	2.02804	-0.156861	2.1849
Q12905	ILF2	0.000464443	3.33307	1.94623	-0.239083	2.18531
P16949	STMN1	0.000417018	3.37985	2.63632	0.45044	2.18588
P49591	SARS1	0.000174545	3.75809	2.29138	0.104267	2.18711
P24534	EEF1B2	0.00700199	2.15478	1.40334	-0.802904	2.20624
Q8N163	CCAR2	0.000255972	3.59181	2.23725	0.0298407	2.20741
Q68E01	INTS3	0.019688	1.7058	1.84027	-0.375303	2.21557
Q96ER9	CCDC51	0.0010696	2.97078	2.05596	-0.165826	2.22179
Q01105	SET	0.000304743	3.51607	1.8963	-0.33107	2.22737
P32119	PRDX2	0.000323203	3.49052	2.3872	0.158475	2.22873
O75964	ATP5MG	0.00783573	2.10592	2.32878	0.0732533	2.25553
P21283	ATP6V1C1	0.00535647	2.27112	2.23993	-0.0273816	2.26731
Q13162	PRDX4	0.000229297	3.6396	1.5814	-0.689551	2.27095
P31350	RRM2	0.000744541	3.12811	2.11476	-0.157847	2.27261
P24752	ACAT1	0.00153639	2.8135	2.22392	-0.0608621	2.28478
Q02952	AKAP12	0.00010308	3.98682	2.68451	0.398996	2.28551
Q96K17	BTF3L4	0.000162472	3.78922	1.88651	-0.399219	2.28573
O00232	PSMD12	0.0011469	2.94048	2.11789	-0.168611	2.2865
P19404	NDUFV2	0.00016074	3.79388	2.47553	0.184631	2.2909
P05114	HMGN1	0.00036374	3.43921	3.0049	0.706916	2.29798
P48735	IDH2	0.00136144	2.866	2.59521	0.289941	2.30527
P28066	PSMA5	0.0210683	1.67637	2.37697	0.0713174	2.30566
Q9BQA1	WDR77	0.000927867	3.03251	2.2737	-0.0419134	2.31562
O75531	BANF1	0.000113632	3.9445	2.74359	0.420227	2.32336
P61160	ACTR2	2.84726e-05	4.54557	2.32267	-0.017231	2.33991
P01889	HLA-B	0.0016469	2.78333	2.2174	-0.133225	2.35062
P00441	SOD1	0.00642976	2.1918	1.88087	-0.48053	2.3614
O14744	PRMT5	0.00681141	2.16676	2.57867	0.212725	2.36595
P51659	HSD17B4	7.29126e-05	4.1372	2.16749	-0.232426	2.39992
P61026	RAB10	0.000111306	3.95348	2.58621	0.163274	2.42294
P06753	TPM3	0.000737696	3.13212	2.26268	-0.172132	2.43481
Q8TCS8	PNPT1	0.000102738	3.98827	2.72204	0.271664	2.45037
P00491	PNP	0.000298682	3.52479	3.06225	0.610237	2.45202
Q14697	GANAB	0.00274765	2.56104	2.55325	0.0770156	2.47624
O60749	SNX2	2.94722e-05	4.53059	2.71238	0.230474	2.48191
P04792	HSPB1	4.00968e-05	4.39689	2.70135	0.217692	2.48365
P49189	ALDH9A1	0.000297768	3.52612	2.88826	0.398967	2.48929
P25789	PSMA4	0.00591854	2.22779	3.0552	0.555742	2.49946
P30153	PPP2R1A	0.00159637	2.79687	2.63332	0.127669	2.50565
Q8N8S7	ENAH	0.0233407	1.63189	2.12546	-0.382632	2.50809
P60174	TPI1	3.70061e-05	4.43173	2.89692	0.384252	2.51267
P31040	SDHA	7.50939e-05	4.1244	2.41975	-0.0964897	2.51624
Q01581	HMGCS1	0.00300369	2.52235	1.95246	-0.564382	2.51684
P54727	RAD23B	0.000137937	3.86032	2.74537	0.223138	2.52223
P08758	ANXA5	0.000142982	3.84472	2.81391	0.281933	2.53198
O00170	AIP	0.00214082	2.66942	2.15693	-0.378361	2.53529
Q9UBQ7	GRHPR	1.20783e-05	4.91799	2.92003	0.378857	2.54117
P07954	FH	0.000212068	3.67352	2.69685	0.153584	2.54327
Q96IZ0	PAWR	0.0311616	1.50638	2.27641	-0.270492	2.5469
Q9NR45	NANS	6.76819e-06	5.16953	3.15309	0.605595	2.54749
Q04760	GLO1	6.57152e-05	4.18233	2.88159	0.311639	2.56995
O00264	PGRMC1	0.00107761	2.96754	1.99539	-0.5896	2.58499
P09211	GSTP1	0.000325641	3.48726	2.38579	-0.204089	2.58988
Q13895	BYSL	0.00830871	2.08047	1.94033	-0.655058	2.59539
P36957	DLST	1.65459e-05	4.78131	2.79139	0.179854	2.61153
P35520	CBS	0.000330354	3.48102	2.74376	0.120009	2.62375
Q92900	UPF1	0.00204757	2.68876	2.65636	0.0317632	2.6246
O00231	PSMD11	0.00176968	2.75211	2.353	-0.274342	2.62734
Q15758	SLC1A5	0.0278311	1.55547	3.29186	0.664407	2.62746
Q15691	MAPRE1	0.000216297	3.66495	2.38477	-0.248435	2.63321
Q16718	NDUFA5	9.49419e-05	4.02254	2.99237	0.333522	2.65885
P49915	GMPS	0.00787609	2.10369	2.60675	-0.0568749	2.66363
P43686	PSMC4	0.00264351	2.57782	2.57235	-0.0970867	2.66943
O95336	PGLS	0.00121125	2.91676	2.41167	-0.265852	2.67752
Q16740	CLPP	0.014422	1.84098	2.66528	-0.0141191	2.6794
P13804	ETFA	0.000137169	3.86274	2.83449	0.154501	2.67999
Q99471	PFDN5	6.55931e-05	4.18314	3.13311	0.441365	2.69174
P29966	MARCKS	7.98465e-05	4.09774	2.59501	-0.0989672	2.69398
Q8N1G4	LRRC47	0.000874751	3.05812	2.77022	0.0698806	2.70034
Q9NSE4	IARS2	8.29183e-05	4.08135	2.70206	-0.000510979	2.70257
P62333	PSMC6	0.000498692	3.30217	2.73738	0.033019	2.70436
P27797	CALR	0.00069586	3.15748	2.5483	-0.199597	2.74789
Q13409	DYNC1I2	0.00357349	2.44691	2.67471	-0.0901639	2.76487
P10515	DLAT	1.07745e-05	4.9676	3.19563	0.40981	2.78582
P06454	PTMA	1.79735e-05	4.74537	3.45035	0.661662	2.78869
O75083	WDR1	1.17514e-05	4.92991	2.69774	-0.102469	2.8002
Q9H3P7	ACBD3	0.00608945	2.21542	2.67379	-0.174723	2.84851
O43765	SGTA	0.000539241	3.26822	2.63321	-0.287816	2.92103
P14550	AKR1A1	4.84557e-06	5.31466	3.23197	0.272913	2.95906
P06744	GPI	1.62732e-05	4.78853	3.01071	0.0101622	3.00055
P28070	PSMB4	3.40833e-05	4.46746	3.46428	0.45046	3.01382
Q99567	NUP88	1.19177e-05	4.92381	2.97946	-0.0382194	3.01768
O60271	SPAG9	1.84973e-06	5.73289	3.32145	0.267103	3.05435
O95218	ZRANB2	0.00100457	2.99802	3.15515	0.00338406	3.15177
Q16763	UBE2S	0.000528977	3.27656	2.80207	-0.362791	3.16486
P61006	RAB8A	0.0426828	1.36975	3.38798	0.19673	3.19125
P54819	AK2	5.87407e-05	4.23106	3.51187	0.299834	3.21204
P49006	MARCKSL1	0.00011967	3.92202	2.86343	-0.36087	3.2243
Q9NX14	NDUFB11	0.0223007	1.65168	2.55163	-0.674839	3.22647
P05455	SSB	8.40111e-05	4.07566	2.98988	-0.270706	3.26058
P68400	CSNK2A1	0.000841732	3.07483	3.06472	-0.221785	3.28651
Q15102	PAFAH1B3	0.00594348	2.22596	3.01802	-0.291533	3.30955
Q13200	PSMD2	3.56341e-05	4.44813	3.56386	0.239447	3.32441
Q6P2E9	EDC4	7.89421e-05	4.10269	3.33436	-0.00410302	3.33846
Q04837	SSBP1	3.10772e-05	4.50756	4.00999	0.66411	3.34588
P67870	CSNK2B	6.12502e-06	5.21289	3.43876	0.0850159	3.35375
P61604	HSPE1	2.66804e-05	4.57381	3.29318	-0.0673807	3.36057
P52926	HMGA2	1.36897e-05	4.86361	3.7727	0.40186	3.37084
P10768	ESD	1.50336e-05	4.82294	3.01598	-0.36362	3.3796
Q16555	DPYSL2	7.52714e-05	4.12337	3.60114	0.217538	3.3836
Q9UBE0	SAE1	0.000223469	3.65078	3.90859	0.485675	3.42291
Q9BTT0	ANP32E	0.00656049	2.18306	3.58537	0.155164	3.4302
P28331	NDUFS1	2.05854e-05	4.68644	3.61267	0.128523	3.48415
Q05639	EEF1A2	2.6084e-05	4.58363	4.09707	0.59764	3.49943
P30085	CMPK1	0.000153112	3.81499	3.80903	0.212961	3.59607
P17980	PSMC3	0.000431879	3.36464	3.82984	0.179464	3.65037
P14209	CD99	0.000470189	3.32773	2.95933	-0.713425	3.67275
P60953	CDC42	2.61937e-05	4.5818	3.95556	0.21694	3.73862
Q7Z5L9	IRF2BP2	0.0227401	1.64321	3.73645	-0.00591263	3.74236
Q99584	S100A13	2.55276e-06	5.59299	3.79594	0.0509739	3.74497
O00273	DFFA	1.21403e-06	5.91577	4.34664	0.51943	3.82721
Q7KZ85	SUPT6H	0.0120497	1.91902	3.48287	-0.347353	3.83023
P07355	ANXA2	0.000859389	3.06581	3.93174	0.099474	3.83226
Q9Y4L1	HYOU1	0.00479295	2.3194	3.88593	0.0529759	3.83295
P38117	ETFB	2.54819e-05	4.59377	3.8534	0.00325233	3.85015
P99999	CYCS	4.59925e-05	4.33731	3.76155	-0.223196	3.98474
Q15155	NOMO1	9.84258e-06	5.00689	4.01951	0.00383769	4.01567
P61956	SUMO2	0.000416925	3.37994	4.54593	0.475584	4.07035
P29373	CRABP2	3.09448e-05	4.50941	4.4147	0.274715	4.13998
P25786	PSMA1	0.0261877	1.5819	4.14327	-0.0118857	4.15516
P62140	PPP1CB	0.00408978	2.3883	4.4248	0.134138	4.29067
Q15436	SEC23A	1.07847e-05	4.96719	4.32186	0.000289351	4.32157
P05091	ALDH2	2.34963e-05	4.629	4.81652	0.278219	4.5383
P0DPI2	GATD3	1.46333e-05	4.83466	4.88777	0.206578	4.68119
O43768	ENSA	3.5979e-06	5.44395	5.31117	0.619818	4.69135
Q8NBS9	TXNDC5	0.000426811	3.36976	5.43521	0.275843	5.15936
O43852	CALU	0.00169853	2.76993	5.40464	-0.523093	5.92773
